# Supplementary material for: N-Heterocyclic carbene-catalysed intramolecular hydroacylation to form basic nitrogen-containing heterocycles
Source: Royal Society of Chemistry journal article supplement (doi:10.1039/c6ob01956k), 2016-01-01

## Supporting Information

### ***N*-Heterocyclic Carbene-Catalysed Intramolecular Hydroacylation to Form Basic**

### **Nitrogen-Containing Heterocycles**

James A. Walker Jr., and Levi M. Stanley\*

Department of Chemistry, Iowa State University, Ames, IA 50011, United States

Email: lstanley@iastate.edu

### **Table of Contents**

|                                                                                                                      |      |
|----------------------------------------------------------------------------------------------------------------------|------|
| General Experimental Details                                                                                         | S-1  |
| Materials                                                                                                            | S-2  |
| General Procedure A: Synthesis of Compounds <b>1a-j</b>                                                              | S-3  |
| Characterization Data for Compounds <b>1a-j</b>                                                                      | S-4  |
| General Procedure B: Synthesis of Compounds <b>5a-f</b>                                                              | S-9  |
| Characterization Data for Compounds <b>5a-f</b>                                                                      | S-10 |
| General Procedure C: Synthesis of Compounds <b>3a-j, and 6a-f</b>                                                    | S-14 |
| Characterization Data for Compounds <b>3a-j and 6a-f</b>                                                             | S-15 |
| General Procedure D: Enantioselective Synthesis of Compounds <b>3e-j</b>                                             | S-23 |
| Characterization Data for Enantioselective Compounds <b>3e-j</b>                                                     | S-23 |
| Representative Procedure for Rh-Catalysed Hydroacylation of <b>1a</b>                                                | S-26 |
| Evaluation of Rh-Catalysed Hydroacylation of <b>1a</b> by <sup>31</sup> P NMR Spectroscopy (Figure S1)               | S-27 |
| Synthesis of Diketone <b>S1</b>                                                                                      | S-28 |
| Evaluation of NHC-Catalysed Reaction of <b>1a</b> by <sup>1</sup> H NMR Spectroscopy (Figure S2)                     | S-29 |
| References                                                                                                           | S-30 |
| <sup>1</sup> H, <sup>13</sup> C, and <sup>19</sup> F NMR Spectra for Compounds <b>1a-j, 5a-f, 3a-j, 6a-f, and S1</b> | S-32 |

### **General Experimental Details**

All air-sensitive procedures were conducted under inert atmosphere in a nitrogen-filled dry box or by standard Schlenk techniques. All reactions were performed under an atmosphere of nitrogen unless otherwise stated. All glassware for moisture sensitive

reactions was dried at 140 °C in an oven. Tetrahydrofuran, methylene chloride and *N,N*-dimethylformamide were degassed by purging with argon for 45 minutes and dried with a solvent purification system by passing through a one-meter column of activated alumina. Anhydrous 1,4-dioxane was purchased from Aldrich. Flash column chromatography was performed on SiliFlash® P60 silica gel (40-63 μm, 60Å) or using a Teledyne Isco Combiflash® Rf system with RediSep Gold™ columns using hexanes/ethyl acetate or dichloromethane/methanol mixtures as eluents. Reaction products were visualized on TLC by UV light or by staining with KMnO<sub>4</sub>.

HRMS (ESI) analysis was performed at the Iowa State University Chemical Instrumentation Facility on an Agilent 6540 QTOF spectrometer. NMR spectra were acquired on Varian MR-400 and Bruker Avance III 600 spectrometers at the Iowa State University Chemical Instrumentation Facility. Chemical shifts are reported in ppm relative to a residual solvent peak (CDCl<sub>3</sub> = 7.26 ppm for <sup>1</sup>H and 77.16 ppm for <sup>13</sup>C, DMSO-*d*<sub>6</sub> = 2.50 for <sup>1</sup>H and 39.52 for <sup>13</sup>C). <sup>19</sup>F NMR shifts are reported in ppm relative to trifluoroacetic acid as an external standard (F<sub>3</sub>CCO<sub>2</sub>H = -76.55 ppm). Coupling constants are reporting in hertz

## Materials

(*E*)-1-(3-Bromoprop-1-en-1-yl)-4-methoxybenzene (**S1c**), (*E*)-1-(3-Bromoprop-1-en-2-yl)-4-chlorobenzene (**S1d**) were synthesized according to reported literature procedures.<sup>1</sup> 1-(3-Bromoprop-1-en-2-yl)-4-fluorobenzene (**S1h**), 1-(3-bromoprop-1-en-2-yl)-4-chlorobenzene (**S1g**), 1-(3-bromoprop-1-en-2-yl)-4-methoxybenzene (**S1f**), 1-(3-bromoprop-1-en-2-yl)-3-fluorobenzene (**S1i**), 1(3-bromoprop-1-en-2-yl)-2-fluorobenzene (**S1j**), and (3-bromoprop-1-en-2-yl)benzene (**S1e**) were synthesized according to a literature procedure.<sup>2</sup> (1*H*-Benzo[*d*]imidazol-2-yl)methanol and (5,6-dimethyl-1*H*-

benzo[*d*]imidazol-2-yl)methanol were synthesized according to a literature procedure.<sup>3</sup> Cinnamyl bromide (**S1b**), allyl bromide (**S1a**), activated manganese dioxide, anhydrous 1,4-dioxane, 1,8-diazabicyclo[5.4.0]undec-7-ene (DBU) were purchased from Aldrich and used without further purification. Imidazole-2-carboxaldehyde was purchased from AK Scientific and used without further purification. Triazolium chloride **2** was synthesized according to a literature procedure.<sup>4</sup> Triazolium tetrafluoroborate **7** was synthesized according to a literature procedure.<sup>5</sup>

### General Procedure A: Synthesis of *N*-allylimidazole-2-carboxaldehydes (**1a-j**):

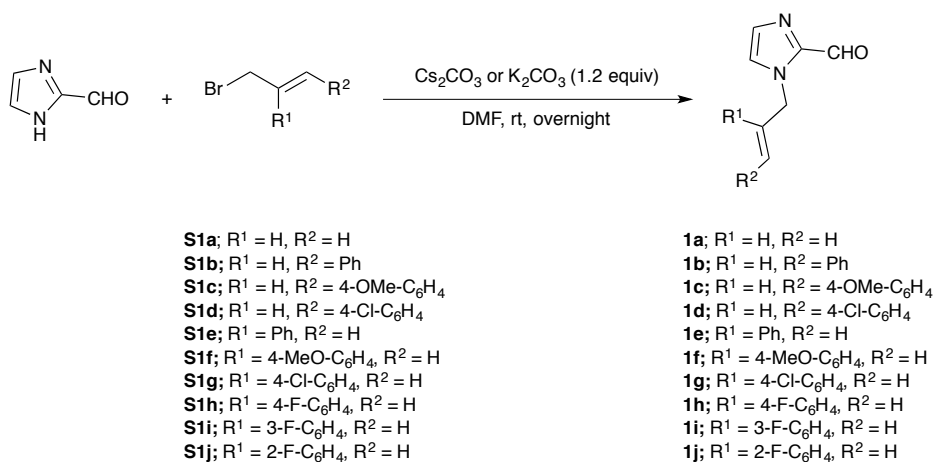

*N*-Allylimidazole-2-carboxaldehydes (**1a-j**) were prepared according to a modified literature procedure from the appropriate allyl bromides (**S1a-j**) and imidazole-2-carboxaldehyde.<sup>6</sup> To the appropriate *N*-allylimidazole-carboxaldehyde (1.0 equiv) and Cs<sub>2</sub>CO<sub>3</sub> or K<sub>2</sub>CO<sub>3</sub> (1.2 equiv) was added DMF (0.27 M). The resulting mixture was stirred at room temperature for 0.5 h. The appropriate allyl bromide (1.2 equiv) was added dropwise. The mixture was stirred at room temperature until the reaction was judged to be complete by thin-layer chromatography. Water was added to the reaction mixture and the resulting solution was extracted with EtOAc (3x). The combined organic layers were

washed with water and brine, dried over Na<sub>2</sub>SO<sub>4</sub>, and concentrated under reduced pressure. The crude product was purified by flash column chromatography on silica gel (hexane:EtOAc) to give the appropriate *N*-allylimidazole-2-carboxaldehyde (**1a-j**).

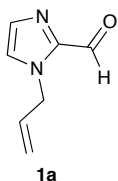

**1-allyl-1*H*-imidazole-2-carboxaldehyde (1a):** Prepared according to general procedure A from imidazole-2-carboxaldehyde (0.500 g, 5.20 mmol) and allyl bromide **S1a** (0.674 mL, 7.80 mmol). The crude reaction mixture was purified by flash column chromatography (90:10 hexane:EtOAc) to give **1a** as a brown oil in 49% yield (350 mg, 2.54 mmol) <sup>1</sup>H NMR (400 MHz, CDCl<sub>3</sub>) δ 4.96 (d, *J* = 6.0 Hz, 2H), 5.02 (dd, *J* = 16.0, 0.8 Hz, 1H), 5.17 (dd, *J* = 10.4, 0.8 Hz, 1H), 5.89 (ddt, *J* = 16.0, 10.4, 6.0 Hz, 1H), 7.11 (app s, 1H), 7.21 (app s, 1H), 9.72 (s, 1H). <sup>13</sup>C NMR (101 MHz, CDCl<sub>3</sub>) δ 49.7, 118.5, 126.0, 131.6, 132.4, 143.1, 181.9. HRMS (ESI): Calcd. for C<sub>7</sub>H<sub>9</sub>N<sub>2</sub>O<sup>+</sup> ([M+H]<sup>+</sup>): 137.0709, Found: 137.0718.

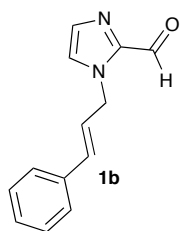

**1-cinnamyl-1*H*-imidazole-2-carboxaldehyde (1b):** Prepared according to general procedure A from imidazole-2-carboxaldehyde (1.44 g, 15.0 mmol) and cinnamyl bromide **S1b** (3.31 mL, 22.5 mmol). The crude reaction mixture was purified by flash column chromatography (70:30 hexanes:EtOAc) to give **1b** as a light yellow solid in 51% yield (1.63 g, 7.68 mmol). <sup>1</sup>H NMR (400 MHz, CDCl<sub>3</sub>) δ 5.12 (dd, *J* = 6.4, 1.2 Hz, 2H), 6.22 (dt, *J* = 15.6, 6.4 Hz, 1H), 6.47 (d, *J* = 15.6 Hz, 1H), 7.16 (app s, 1H), 7.18-7.30 (m, 6H), 9.77 (s, 1H). <sup>13</sup>C NMR (101 MHz, CDCl<sub>3</sub>) δ 49.5, 123.3, 126.0, 126.7, 128.4, 128.8, 131.9, 134.4, 135.8, 143.3, 182.3. HRMS (ESI): Calcd. for C<sub>13</sub>H<sub>13</sub>N<sub>2</sub>O<sup>+</sup> ([M+H]<sup>+</sup>): 213.1022, Found: 213.1026.

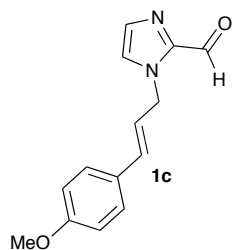

**(E)-1-(3-(4-methoxyphenyl)allyl)-1H-imidazole-2-carboxaldehyde**

**(1c):** Prepared according to general procedure A from imidazole-2-carboxaldehyde (62.0 mg, 0.640 mmol), and *trans-p*-methoxycinnamyl bromide **S1c** (0.219 g, 0.970 mmol). The crude reaction mixture was

purified by flash column chromatography (100:0 hexanes:EtOAc to 90:10 hexanes:EtOAc) to give **1c** as a brown oil in 39% yield (0.060 g, 0.25 mmol). **<sup>1</sup>H NMR** (400 MHz, CDCl<sub>3</sub>) δ 3.73 (s, 3H), 5.09 (d, *J* = 6.0 Hz, 2H), 6.09 (dt, *J* = 15.6, 6.0 Hz, 1H), 6.44 (d, *J* = 15.6 Hz, 1H), 6.78 (d, *J* = 8.0 Hz, 2H), 7.14-7.30 (m, 4H), 9.77 (s, 1H). **<sup>13</sup>C NMR** (101 MHz, CDCl<sub>3</sub>) δ 49.7, 55.4, 114.2, 120.9, 125.9, 128.0, 128.5, 131.9, 134.0, 143.3, 159.9, 182.3. **HRMS** (ESI): Calcd. for C<sub>14</sub>H<sub>15</sub>N<sub>2</sub>O<sub>2</sub><sup>+</sup> ([M+H]<sup>+</sup>): 243.1128, Found: 243.1135.

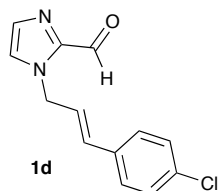

**(E)-1-(3-(4-chlorophenyl)allyl)-1H-imidazole-2-carboxaldehyde**

**(1d):** Prepared according to general procedure A from imidazole-2-carboxaldehyde (0.140 g, 1.44 mmol) and *trans-p*-chlorocinnamyl bromide **S1d** (0.500 g, 2.16 mmol). The crude reaction mixture was purified by flash

column chromatography (100:0 hexanes:EtOAc to 90:10 hexanes:EtOAc) to give **1d** as an off-white solid in 23% yield (0.082 g, 0.33 mmol). **<sup>1</sup>H NMR** (400 MHz, CDCl<sub>3</sub>) δ 5.11 (d, *J* = 8.0 Hz, 2H), 6.18 (dt, *J* = 16.0, 8.0 Hz, 1H), 6.38 (d, *J* = 16.0 Hz, 1H), 7.15 (app s, 1H), 7.17-7.22 (m, 4H), 7.25 (app s, 1H), 9.77 (s, 1H). **<sup>13</sup>C NMR** (101 MHz, CDCl<sub>3</sub>) δ 49.4, 124.1, 126.0, 127.9, 129.0, 132.0, 132.9, 134.1, 134.3, 143.3, 182.3. **HRMS** (ESI): Calcd. for C<sub>13</sub>H<sub>12</sub>ClN<sub>2</sub>O<sup>+</sup> ([M+H]<sup>+</sup>): 247.0633, Found: 247.0642.

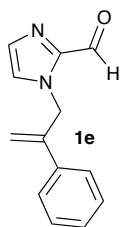

**1-(2-phenylallyl)-1H-imidazole-2-carboxaldehyde (1e):** Prepared according to general procedure A from imidazole-2-carboxaldehyde (0.200 g, 2.08 mmol) and 2-phenylallyl bromide **S1e** (0.615 g, 3.12 mmol). The crude reaction mixture was purified by flash column chromatography (100:0 hexanes:EtOAc to

90:10 hexanes:EtOAc) to give **1e** as a brown oil in 65% yield (0.286 g, 1.35 mmol). **<sup>1</sup>H NMR** (400 MHz, CDCl<sub>3</sub>) δ 4.81 (s, 1H), 5.38 (app s, 3H), 7.05 (app s, 1H), 7.16 (app s, 1H), 7.18-7.28 (m, 1H), 7.23 (d, *J* = 8.0 Hz, 2H), 7.31 (dd, *J* = 8.0, 1.2 Hz, 2H), 9.74 (s, 1H). **<sup>13</sup>C NMR** (101 MHz, CDCl<sub>3</sub>) δ 50.8, 115.2, 126.2, 126.3, 128.5, 128.7, 131.8, 137.8, 143.3, 143.6, 182.2. **HRMS** (ESI): Calcd. for C<sub>13</sub>H<sub>13</sub>N<sub>2</sub>O<sup>+</sup> ([M+H]<sup>+</sup>): 213.1022, Found: 213.1020

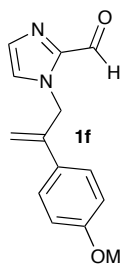

**1-(2-(4-methoxyphenyl)allyl)-1H-imidazole-2-carboxaldehyde (1f):**

Prepared according to general procedure A from imidazole-2-carbaldehyde (0.455 g, 4.74 mmol) and 1-(3-bromoprop-1-en-2-yl)-4-methoxybenzene **S1f** (1.29g, 5.68 mmol). The crude reaction mixture was purified by flash column chromatography (100:0 hexanes:EtOAc to 90:10 hexanes:EtOAc) to give **1f** as a light-brown solid in 12% yield (0.138 g, 0.570 mmol). **<sup>1</sup>H NMR** (400 MHz, CDCl<sub>3</sub>) δ 3.79 (s, 3H), 4.85 (s, 1H), 5.41 (s, 1H), 5.44 (s, 2H), 6.84 (d, *J* = 8.4 Hz, 2H), 7.13 (app s, 1H), 7.24 (app s, 1H), 7.33 (d, *J* = 8.4 Hz, 2H), 9.83 (s, 1H). **<sup>13</sup>C NMR** (101 MHz, CDCl<sub>3</sub>) δ 51.0, 55.4, 114.0, 114.1, 126.3, 127.4, 130.2, 131.8, 142.9, 143.4, 159.9, 182.3. **HRMS** (ESI): Calcd. for C<sub>14</sub>H<sub>15</sub>N<sub>2</sub>O<sub>2</sub><sup>+</sup> ([M+H]<sup>+</sup>): 243.1128, Found:243.1127

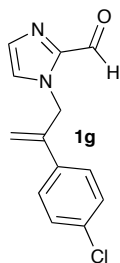

**1-(2-(4-chlorophenyl)allyl)-1H-imidazole-2-carboxaldehyde (1g):**

Prepared according to general procedure A from imidazole-2-carboxaldehyde (0.390 g, 4.11 mmol) and 1-(3-bromoprop-1-en-2-yl)-4-chlorobenzene **S1g** (1.14 g, 4.93 mmol). The crude reaction mixture was purified by flash column chromatography (100:0 hexanes:EtOAc to 90:10 hexanes:EtOAc) to give **1g** as a off-white solid in 30% yield (0.300 g, 1.23 mmol). **<sup>1</sup>H NMR** (400 MHz, CDCl<sub>3</sub>) δ 4.94 (s, 1H), 5.45 (s, 2H), 5.47 (s, 1H), 7.14 (app s, 1H), 7.27 (d, *J* = 8.4 Hz, 2H), 7.27 (app s, 1H), 7.46 (d, *J* = 8.4 Hz, 2H), 9.82 (s, 1H). **<sup>13</sup>C NMR** (101 MHz, CDCl<sub>3</sub>) δ 50.7, 115.9, 122.7, 126.3, 127.9, 131.9, 132.0, 136.8, 142.8, 143.3, 182.3. **HRMS** (ESI): Calcd. for C<sub>13</sub>H<sub>12</sub>ClN<sub>2</sub>O<sup>+</sup> ([M+H]<sup>+</sup>): 247.0633, Found: 247.0624

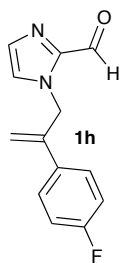

**1-(2-(4-fluorophenyl)allyl)-1H-imidazole-2-carboxaldehyde (1h):**

Prepared according to general procedure A from imidazole-2-carboxaldehyde (0.306 g, 3.19 mmol) and 1-(3-bromoprop-1-en-2-yl)-4-fluorobenzene **S1h** (0.823 g, 3.83 mmol). The crude reaction mixture was purified by flash column chromatography (100:0 hexanes:EtOAc to 90:10 hexanes:EtOAc) to give **1h** as a brown amorphous solid in 23% yield (0.168 g, 0.730 mmol). **<sup>1</sup>H NMR** (400 MHz, CDCl<sub>3</sub>) δ 4.88 (s, 1H), 5.40 (s, 1H), 5.43 (s, 2H), 7.00 (dd, *J* = 8.8, 8.8 Hz, 2H), 7.13 (app s, 1H), 7.25 (d, *J* = 0.8 Hz, 1H), 7.35 (dd, *J* = 8.8, 5.2 Hz, 2H), 9.81 (d, *J* = 1.2 Hz, 1H). **<sup>13</sup>C NMR** (101 MHz, CDCl<sub>3</sub>) δ 50.9, 115.3 (d, *J* = 1.2 Hz, 2C), 115.7 (d, *J* = 21.8 Hz, 2C), 126.3, 128.0 (d, *J* = 8 Hz, 1C), 131.9, 133.9 (d, *J* = 3.4 Hz, 1C), 142.8, 143.3, 162.9 (d, *J* = 249.5 Hz, 1C), 182.3. **<sup>19</sup>F NMR** (CDCl<sub>3</sub>, 376 MHz): δ -113.48 (m, 1F). **HRMS** (ESI): Calcd. for C<sub>13</sub>H<sub>12</sub>FN<sub>2</sub>O<sup>+</sup> ([M+H]<sup>+</sup>): 231.0928, Found: 231.0922

**1-(2-(3-fluorophenyl)allyl)-1H-imidazole-2-carboxaldehyde (1i):**

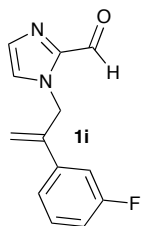

Prepared according to general procedure A from imidazole-2-carboxaldehyde (0.291 g, 3.03 mmol) and 1-(3-bromoprop-1-en-2-yl)-3-fluorobenzene **S1i** (0.784 g, 3.64 mmol). The crude reaction mixture was purified by flash column

chromatography (100:0 hexanes:EtOAc to 90:10 hexanes:EtOAc) to give **1i** as a brown oil in 28% yield (0.195 g, 0.846 mmol). **<sup>1</sup>H NMR** (400 MHz, CDCl<sub>3</sub>) δ 4.94 (s, 1H), 5.46 (s, 2H), 5.50 (s, 1H), 7.00 (m, 1H), 7.10 (app dt, *J* = 15.6, 2.4 Hz, 1H), 7.15 (app s, 1H), 7.18(ddd, *J* = 7.6, 1.6, 0.8 Hz, 1H), 7.28 (d, *J* = 0.8 Hz, 1H), 7.28-7.34 (m, 1H), 9.83 (d, *J* = 0.8 Hz, 1H). **<sup>13</sup>C NMR** (101 MHz, CDCl<sub>3</sub>) δ 50.6, 113.4 (d, *J* = 22.2 Hz, 1C), 115.4 (d, *J* = 21.2 Hz, 1C), 116.1, 121.9 (d, *J* = 3.0 Hz, 1C), 126.3, 130.3 (d, *J* = 8.4 Hz, 1C), 131.9, 140.1 (d, *J* = 7.6 Hz, 1C), 142.7 (d, *J* = 2.2 Hz, 1C), 143.3, 162.9 (d, *J* = 247.6 Hz, 1C), 182.2. **<sup>19</sup>F NMR** (CDCl<sub>3</sub> 376 MHz): δ -112.71 (m, 1F). **HRMS** (ESI): Calcd. for C<sub>13</sub>H<sub>12</sub>FN<sub>2</sub>O<sup>+</sup> ([M+H]<sup>+</sup>): 231.0928, Found: 231.0922

**1(2-(2-fluorophenyl)allyl)-1H-imidazole-2-carbaldehyde (1j):**

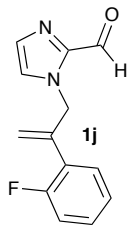

Prepared according to general procedure A from imidazole-2-carbaldehyde (0.570 g, 5.88 mmol) and 1-(3-bromoprop-1-en-2-yl)-2-fluorobenzene **S1j** (1.52 g, 7.01 mmol). The crude reaction mixture was purified by flash column

chromatography (100:0 hexanes:EtOAc to 90:10 hexanes:EtOAc) to give **1j** as a brown oil in 15% yield (0.200 g, 0.866 mmol). **<sup>1</sup>H NMR** (400 MHz, CDCl<sub>3</sub>) δ 5.12 (s, 1H), 5.38 (s, 1H), 5.42 (s, 2H), 7.02-7.12 (m, 2H), 7.14 (s, 1H), 7.20-7.32 (m, 3H), 9.80 (d, *J* = 0.8 Hz, 1H). **<sup>13</sup>C NMR** (101 MHz, CDCl<sub>3</sub>) δ 51.4, 115.9 (d, *J* = 22.4 Hz, 1C), 118.6 (d, *J* = 2.2 Hz, 1C), 124.5 (d, *J* = 3.4 Hz, 1C), 126.2 (d, *J* = 14.4 Hz, 1C), 126.6, 130.1 (d, *J* = 8.4 Hz, 1C), 130.2 (d, *J* = 3.8 Hz,



1C), 131.7, 140.0, 143.4, 159.9 (d,  $J = 248.6$  Hz, 1C), 181.9.  $^{19}\text{F}$  NMR ( $\text{CDCl}_3$ , 376 MHz):  $\delta$  -115.31 (m, 1F). HRMS (ESI): Calcd. for  $\text{C}_{13}\text{H}_{12}\text{FN}_2\text{O}^+$  ( $[\text{M}+\text{H}]^+$ ): 231.0928, Found: 231.0926.

### General Procedure B: Synthesis of *N*-allylbenzimidazole-2-carboxaldehyde (**5a-f**)

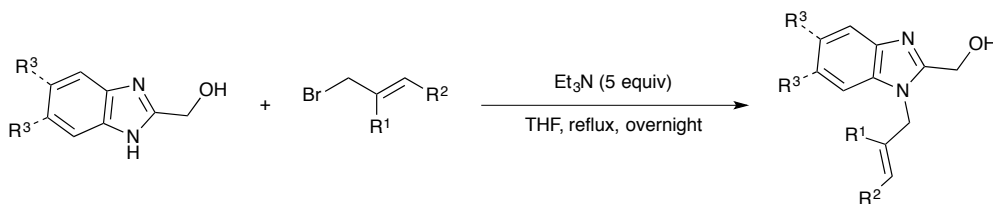

**S1a**;  $\text{R}^1 = \text{H}$ ,  $\text{R}^2 = \text{H}$   
**S1b**;  $\text{R}^1 = \text{H}$ ,  $\text{R}^2 = \text{Ph}$   
**S1c**;  $\text{R}^1 = \text{H}$ ,  $\text{R}^2 = 4\text{-Cl-C}_6\text{H}_4$   
**S1d**;  $\text{R}^1 = \text{Ph}$ ,  $\text{R}^2 = \text{H}$

**S2a**;  $\text{R}^1 = \text{H}$ ,  $\text{R}^2 = \text{H}$ ,  $\text{R}^3 = \text{H}$   
**S2b**;  $\text{R}^1 = \text{H}$ ,  $\text{R}^2 = \text{Ph}$ ,  $\text{R}^3 = \text{H}$   
**S2c**;  $\text{R}^1 = \text{H}$ ,  $\text{R}^2 = 4\text{-Cl-C}_6\text{H}_4$ ,  $\text{R}^3 = \text{H}$   
**S2d**;  $\text{R}^1 = \text{Ph}$ ,  $\text{R}^2 = \text{H}$ ,  $\text{R}^3 = \text{H}$   
**S2e**;  $\text{R}^1 = \text{H}$ ,  $\text{R}^2 = \text{H}$ ,  $\text{R}^3 = \text{CH}_3$   
**S2f**;  $\text{R}^1 = \text{H}$ ,  $\text{R}^2 = 4\text{-Cl-C}_6\text{H}_4$ ,  $\text{R}^3 = \text{CH}_3$

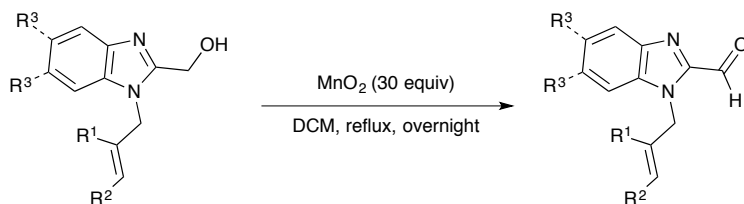

**S2a**;  $\text{R}^1 = \text{H}$ ,  $\text{R}^2 = \text{H}$ ,  $\text{R}^3 = \text{H}$   
**S2b**;  $\text{R}^1 = \text{H}$ ,  $\text{R}^2 = \text{Ph}$ ,  $\text{R}^3 = \text{H}$   
**S2c**;  $\text{R}^1 = \text{H}$ ,  $\text{R}^2 = 4\text{-Cl-C}_6\text{H}_4$ ,  $\text{R}^3 = \text{H}$   
**S2d**;  $\text{R}^1 = \text{Ph}$ ,  $\text{R}^2 = \text{H}$ ,  $\text{R}^3 = \text{H}$   
**S2e**;  $\text{R}^1 = \text{H}$ ,  $\text{R}^2 = \text{H}$ ,  $\text{R}^3 = \text{CH}_3$   
**S2f**;  $\text{R}^1 = \text{H}$ ,  $\text{R}^2 = 4\text{-Cl-C}_6\text{H}_4$ ,  $\text{R}^3 = \text{CH}_3$

**5a**;  $\text{R}^1 = \text{H}$ ,  $\text{R}^2 = \text{H}$ ,  $\text{R}^3 = \text{H}$   
**5b**;  $\text{R}^1 = \text{H}$ ,  $\text{R}^2 = \text{Ph}$ ,  $\text{R}^3 = \text{H}$   
**5c**;  $\text{R}^1 = \text{H}$ ,  $\text{R}^2 = 4\text{-Cl-C}_6\text{H}_4$ ,  $\text{R}^3 = \text{H}$   
**5d**;  $\text{R}^1 = \text{Ph}$ ,  $\text{R}^2 = \text{H}$ ,  $\text{R}^3 = \text{H}$   
**5e**;  $\text{R}^1 = \text{H}$ ,  $\text{R}^2 = \text{H}$ ,  $\text{R}^3 = \text{CH}_3$   
**5f**;  $\text{R}^1 = \text{H}$ ,  $\text{R}^2 = 4\text{-Cl-C}_6\text{H}_4$ ,  $\text{R}^3 = \text{CH}_3$

*N*-allylbenzimidazole-2-carboxaldehydes (**5a-f**) were prepared according to a modified literature procedure from (1*H*-benzo[*d*]imidazol-2-yl)methanol or (5,6-dimethyl-1*H*-benzo[*d*]imidazol-2-yl)methanol.<sup>7</sup> To a solution of (1*H*-benzo[*d*]imidazol-2-yl)methanol or (5,6-dimethyl-1*H*-benzo[*d*]imidazol-2-yl)methanol in THF (0.3M) was added  $\text{Et}_3\text{N}$  (5 equiv). The solution was refluxed for 1 h. The appropriate allyl bromide (1.2-5.0 equiv)(**S1a-d**) was added, and the mixture refluxed overnight. Water was added to the cooled reaction mixture. The resulting mixture was extracted with  $\text{Et}_2\text{O}$  (3x). The organic layer was dried ( $\text{Na}_2\text{SO}_4$ ) and concentrated under reduced pressure to afford the

appropriate crude *N*-allylbenzimidazol-2-methanol (**S2a-f**). To a solution of the crude *N*-allylbenzimidazol-2-methanol (1.00 equiv) in DCM (4 mM) was added activated MnO<sub>2</sub> (30.0 equiv). The resulting mixture was refluxed overnight. The cooled reaction mixture was filtered through a plug of celite. The combined organic layers were concentrated under reduced pressure. The crude product was purified by flash column chromatography on silica gel (DCM:EtOAc or hexanes:EtOAc) to give the appropriate *N*-allylbenzimidazole-2-carboxaldehyde (**5a-f**).

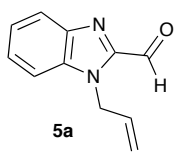

**1-allyl-1H-benzo[d]imidazole-2-carboxaldehyde (5a):** Prepared according to general procedure B from (1*H*-benzo[d]imidazol-2-yl)methanol (0.500 g, 3.37 mmol) and allyl bromide **S1a** (291  $\mu$ L, 3.37

mmol) to give the crude product **S2a** (0.201 g, 1.06 mmol). Oxidation with MnO<sub>2</sub> (0.929 mg, 10.69 mmol) generated crude **5a**. The crude reaction mixture was purified by flash column chromatography (100:0 hexanes:EtOAc to 90:10 hexanes EtOAc) to give **5a** as an orange solid in 20% yield over two-steps (0.128 g, 0.687 mmol). <sup>1</sup>H NMR (600 MHz, CDCl<sub>3</sub>)  $\delta$  5.03 (dd, *J* = 16.8, 0.6 Hz, 1H), 5.19 (dd, *J* = 10.2, 0.6 Hz, 1H), 5.25 (app dt, *J* = 5.4, 1.2 Hz, 2H), 5.98 (ddt, *J* = 16.8, 10.2, 5.4 Hz, 1H), 7.37-7.40 (m, 1H), 7.45-7.46 (m, 2H), 7.93 (d, *J* = 8.4 Hz, 1H), 10.10 (s, 1H). <sup>13</sup>C NMR (151 MHz, CDCl<sub>3</sub>)  $\delta$  46.9, 111.2, 117.8, 122.5, 124.3, 127.0, 132.1, 136.4, 143.0, 145.8, 184.9 HRMS (ESI): Calcd. for C<sub>11</sub>H<sub>11</sub>N<sub>2</sub>O<sup>+</sup> ([M+H]<sup>+</sup>): 187.0866, Found: 187.0872

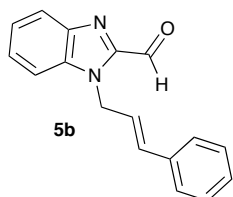

**1-cinnamyl-1H-benzo[d]imidazole-2-carboxaldehyde (5b):** Prepared according to general procedure B from (1*H*-benzo[d]imidazol-2-yl)methanol (0.801 g, 5.41 mmol) and **S1b** (4.00 mL, 27.0 mmol) to

give the crude product **S2b** (0.258 g, 0.980 mmol). Oxidation with MnO<sub>2</sub> (2.55 g, 29.3 mmol) generated crude **5b**. The crude reaction mixture was purified by flash column chromatography (100:0 DCM:EtOAc to 95:5 DCM:EtOAc) to give **5b** as a light-orange solid in 9% yield over two-steps (0.132 g, 0.500 mmol). **<sup>1</sup>H NMR** (600 MHz, CDCl<sub>3</sub>) δ 5.43 (dd, *J* = 6.0, 1.2, Hz, 2H), 6.34 (dt, *J* = 16.2, 6.0 Hz, 1H), 6.56 (d, *J* = 16.2 Hz, 1H), 7.25 (t, *J* = 7.2 Hz, 1H), 7.30 (t, *J* = 7.2 Hz, 2H), 7.33 (d, *J* = 7.2 Hz, 2H), 7.44 (ddd, *J* = 15.6, 8.4, 1.2 Hz, 1H), 7.50 (ddd, *J* = 15.6, 8.4, 1.2 Hz, 1H), 7.56 (d, *J* = 8.4 Hz, 1H), 7.99 (d, *J* = 8.4 Hz, 1H), 10.17 (s, 1H). **<sup>13</sup>C NMR** (151 MHz, CDCl<sub>3</sub>) δ 46.7, 111.2, 122.5, 123.2, 124.3, 126.6, 127.1, 128.2, 128.6, 133.4, 135.8, 136.3, 143.0, 145.8, 184.9. **HRMS** (ESI): Calcd. for C<sub>17</sub>H<sub>15</sub>N<sub>2</sub>O<sup>+</sup> ([M+H]<sup>+</sup>): 263.1179, Found: 263.1181.

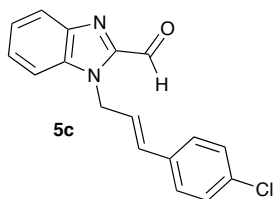

**(E)-1-(3-(4-chlorophenyl)allyl)-1H-benzo[d]imidazole-2-carboxaldehyde (5c)**: Prepared according to general procedure B from (1H-benzo[d]imidazol-2-yl)methanol (0.452 g, 3.05 mmol) and

**S1c** (3.53 g, 15.2 mmol) to give the crude product **S2c** (0.227 g, 0.765 mmol). Oxidation with MnO<sub>2</sub> (1.98 g, 22.8 mmol) generated crude **5c**. The crude reaction mixture was purified by flash column chromatography (100:0 hexanes:EtOAc to 85:15 hexanes:EtOAc) to give **5c** as a white solid in 7% yield over two-steps (0.059 g, 0.20 mmol). **<sup>1</sup>H NMR** (600 MHz, CDCl<sub>3</sub>) δ 5.40 (dd, *J* = 6.0, 1.2 Hz, 2H), 6.29 (dt, *J* = 15.6, 6.0 Hz, 1H), 6.46 (d, *J* = 15.6 Hz, 1H), 7.20-7.24 (m, 4H), 7.41 (ddd, *J* = 15.0, 8.4, 1.2 Hz, 1H), 7.48, (ddd, *J* = 15.0, 8.4, 1.2 Hz, 1H), 7.52 (d, *J* = 8.4 Hz, 1H), 7.96 (d, *J* = 8.4 Hz, 1H), 10.13 (s, 1H). **<sup>13</sup>C NMR** (151 MHz, CDCl<sub>3</sub>) δ 46.5, 111.1, 122.7, 123.9, 124.4, 127.2, 127.9, 128.9, 132.1, 133.9, 134.4, 136.4,

143.0, 145.8, 185.1. **HRMS** (ESI): Calcd. for  $C_{17}H_{14}ClN_2O^+$  ( $[M+H]^+$ ): 297.0789, Found: 297.0789.

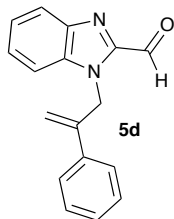

**1-(2-phenylallyl)-1H-benzo[d]imidazole-2-carboxaldehyde (5d):**

Prepared according to general procedure B from (1H-benzo[d]imidazol-2-yl)methanol (0.725 g, 4.89 mmol) and **S1d** (4.82 g, 24.5 mmol) to give the crude product **S2d** (0.437 g, 1.65 mmol), Oxidation with  $MnO_2$  (4.31 g, 49.6 mmol) generate crude **5d**. The crude reaction mixture was purified by flash column chromatography (100:0 hexanes:EtOAc to 90:10 hexanes:EtOAc) to give **5d** as an orange solid in 16% yield over two-steps (0.210 g, 0.801 mmol).  **$^1H$  NMR** (600 MHz,  $CDCl_3$ )  $\delta$  4.51 (s, 1H), 5.33 (s, 1H), 5.67 (s, 2H), 7.30-7.38 (m, 3H), 7.38-7.42 (m, 1H), 7.43-7.48 (m, 4H), 7.94 (d,  $J = 8.4$  Hz, 1H), 10.11 (s, 1H).  **$^{13}C$  NMR** (151 MHz,  $CDCl_3$ )  $\delta$  48.2, 111.6, 113.1, 122.5, 124.4, 126.4, 127.2, 128.5, 128.7, 136.7, 138.5, 142.9, 143.3, 146.0, 184.9. **HRMS** (ESI): Calcd. for  $C_{17}H_{15}N_2O^+$  ( $[M+H]^+$ ): 263.1179, Found: 263.1184.

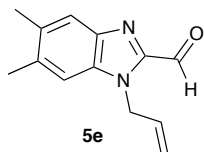

**1-allyl-5,6-dimethyl-1H-benzo[d]imidazole-2-carboxaldehyde (5e):**

Prepared according to general procedure B from (5,6-dimethyl-1H-benzo[d]imidazol-2-yl)methanol (1.00 g, 5.67 mmol) and **S1a** (0.589 ml, 6.81 mmol) to give the crude product **S2e** (0.289 g, 1.35 mmol). Oxidation with  $MnO_2$  (3.55 g, 41.9 mmol) generated crude **5e**. The crude reaction mixture was purified by flash column chromatography (100:0 DCM:EtOAc to 90:10 DCM:EtOAc) to give **5e** as a white solid in 4% yield over two-steps (0.047 g, 0.22 mmol).  **$^1H$  NMR** (400 MHz,  $CDCl_3$ )  $\delta$  2.39 (s, 3H), 2.42 (s, 3H), 5.00 (dd,  $J = 17.2, 0.8$  Hz, 1H), 5.18 (dd,  $J = 10.4, 0.8$  Hz, 1H), 5.21 (m, 2H), 5.93-6.02 (m, 1H), 7.20 (s, 1H), 7.66 (s, 1H), 10.05 (s, 1H).  **$^{13}C$  NMR** (101 MHz,  $CDCl_3$ )  $\delta$  20.6, 21.2,

46.9, 110.9, 117.5, 121.9, 132.3, 134.0, 135.2, 137.5, 141.9, 145.4, 184.7. **HRMS** (ESI): Calcd. for  $C_{13}H_{15}N_2O^+$  ( $[M+H]^+$ ): 215.1179, Found: 215.1184.

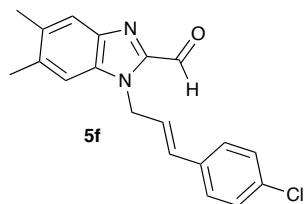

**(E)-1-(3-(4-chlorophenyl)allyl)-5,6-dimethyl-1H-benzo[d]imidazole-2-carboxaldehyde (5f)**: Prepared according to general procedure B from (5,6-dimethyl-1H-benzo[d]imidazol-2-yl)methanol (1.00 g, 5.74 mmol) and **S1c** (1.58 g, 6.81 mmol) to give the crude product **S2f** (0.330 g, 1.01 mmol). Oxidation with  $MnO_2$  (2.65 g, 30.5 mmol) generated crude **5f**. The crude reaction mixture was purified by flash column chromatography (100:0 DCM:EtOAc to 90:10 DCM:EtOAc) to give **5f** as a yellow oil in 3% yield over two-steps (0.050 g, 0.15 mmol).  **$^1H$  NMR** (400 MHz,  $CDCl_3$ )  $\delta$  2.40 (s, 3H), 2.42 (s, 3H), 5.34 (d,  $J = 5.6$  Hz, 2H), 6.28 (dt,  $J = 16.0, 5.6$  Hz, 1H), 6.41 (d,  $J = 16$  Hz, 1H), 7.18-7.23 (m, 4H), 7.25 (s, 1H), 7.68 (s, 1H), 10.07 (s, 1H).  **$^{13}C$  NMR** (101 MHz,  $CDCl_3$ )  $\delta$  20.6, 21.3, 46.3, 110.7, 122.0, 124.2, 127.8, 128.8, 131.7, 133.8, 134.1, 134.5, 135.1, 137.6, 141.9, 145.3, 184.7. **HRMS** (ESI): Calcd. for  $C_{19}H_{18}ClN_2O^+$  ( $[M+H]^+$ ): 325.1102, Found: 325.1093

**General Procedure C: Synthesis of dihydropyrroloimidazolones (3a-j), dihydrobenzopyrroloimidazolones (6a-f)**

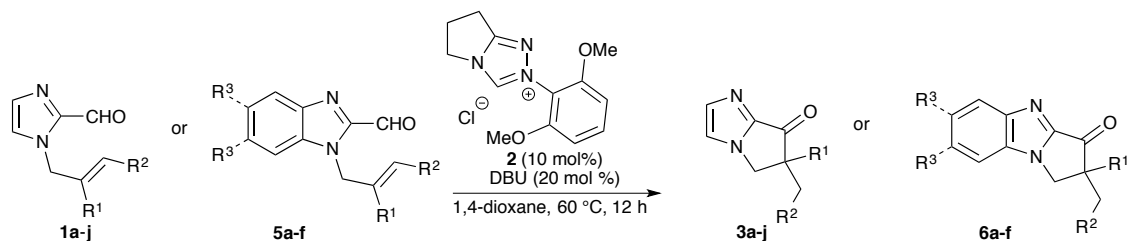

**1a**; R<sup>1</sup> = H, R<sup>2</sup> = H  
**1b**; R<sup>1</sup> = H, R<sup>2</sup> = Ph  
**1c**; R<sup>1</sup> = H, R<sup>2</sup> = 4-OMe-C<sub>6</sub>H<sub>4</sub>  
**1d**; R<sup>1</sup> = H, R<sup>2</sup> = 4-Cl-C<sub>6</sub>H<sub>4</sub>  
**1e**; R<sup>1</sup> = Ph, R<sup>2</sup> = H  
**1f**; R<sup>1</sup> = 4-MeO-C<sub>6</sub>H<sub>4</sub>, R<sup>2</sup> = H  
**1g**; R<sup>1</sup> = 4-Cl-C<sub>6</sub>H<sub>4</sub>, R<sup>2</sup> = H  
**1h**; R<sup>1</sup> = 4-F-C<sub>6</sub>H<sub>4</sub>, R<sup>2</sup> = H  
**1i**; R<sup>1</sup> = 3-F-C<sub>6</sub>H<sub>4</sub>, R<sup>2</sup> = H  
**1j**; R<sup>1</sup> = 2-F-C<sub>6</sub>H<sub>4</sub>, R<sup>2</sup> = H

**5a**; R<sup>1</sup> = H, R<sup>2</sup> = H, R<sup>3</sup> = H  
**5b**; R<sup>1</sup> = H, R<sup>2</sup> = Ph, R<sup>3</sup> = H  
**5c**; R<sup>1</sup> = H, R<sup>2</sup> = 4-Cl-C<sub>6</sub>H<sub>4</sub>, R<sup>3</sup> = H  
**5d**; R<sup>1</sup> = Ph, R<sup>2</sup> = H, R<sup>3</sup> = H  
**5e**; R<sup>1</sup> = H, R<sup>2</sup> = H, R<sup>3</sup> = CH<sub>3</sub>  
**5f**; R<sup>1</sup> = H, R<sup>2</sup> = 4-Cl-C<sub>6</sub>H<sub>4</sub>, R<sup>3</sup> = CH<sub>3</sub>

**3a**; R<sup>1</sup> = H, R<sup>2</sup> = H  
**3b**; R<sup>1</sup> = H, R<sup>2</sup> = Ph  
**3c**; R<sup>1</sup> = H, R<sup>2</sup> = 4-OMe-C<sub>6</sub>H<sub>4</sub>  
**3d**; R<sup>1</sup> = H, R<sup>2</sup> = 4-Cl-C<sub>6</sub>H<sub>4</sub>  
**3e**; R<sup>1</sup> = Ph, R<sup>2</sup> = H  
**3f**; R<sup>1</sup> = 4-MeO-C<sub>6</sub>H<sub>4</sub>, R<sup>2</sup> = H  
**3g**; R<sup>1</sup> = 4-Cl-C<sub>6</sub>H<sub>4</sub>, R<sup>2</sup> = H  
**3h**; R<sup>1</sup> = 4-F-C<sub>6</sub>H<sub>4</sub>, R<sup>2</sup> = H  
**3i**; R<sup>1</sup> = 3-F-C<sub>6</sub>H<sub>4</sub>, R<sup>2</sup> = H  
**3j**; R<sup>1</sup> = 2-F-C<sub>6</sub>H<sub>4</sub>, R<sup>2</sup> = H

**6a**; R<sup>1</sup> = H, R<sup>2</sup> = H, R<sup>3</sup> = H  
**6b**; R<sup>1</sup> = H, R<sup>2</sup> = Ph, R<sup>3</sup> = H  
**6c**; R<sup>1</sup> = H, R<sup>2</sup> = 4-Cl-C<sub>6</sub>H<sub>4</sub>, R<sup>3</sup> = H  
**6d**; R<sup>1</sup> = Ph, R<sup>2</sup> = H, R<sup>3</sup> = H  
**6e**; R<sup>1</sup> = H, R<sup>2</sup> = H, R<sup>3</sup> = CH<sub>3</sub>  
**6f**; R<sup>1</sup> = H, R<sup>2</sup> = 4-Cl-C<sub>6</sub>H<sub>4</sub>, R<sup>3</sup> = CH<sub>3</sub>

Dihydropyrroloimidazolones (**3a-j**) and dihydrobenzopyrroloimidazolones (**6a-f**) were prepared according to a modified literature procedure from the appropriate carboxaldehyde (**1a-j**) or (**5a-f**).<sup>4</sup> In a nitrogen-filled glovebox, to a 1-dram vial was added triazolium **2** (0.020 mmol, 0.10 equiv), the appropriate carboxaldehyde **1a-j** or **5a-f** (0.20 mmol, 1.0 equiv), DBU (6  $\mu$ L, 0.04 mmol, 0.2 equiv), and 1,4-dioxane (0.4 mL, 0.5 M). The vial was sealed with a teflon-lined septum cap. The reaction vessel was removed from the glovebox and the reaction mixture was stirred at 60 °C for 12 h. The reaction was cooled to room temperature and filtered through a plug of silica gel with EtOAc as eluent. The filtrate was concentrated under reduced pressure. The crude product was purified by flash column silica gel chromatography (hexane:EtOAc) to give the appropriate dihydropyrroloimidazolones (**3a-j**) and dihydrobenzopyrroloimidazolones (**6a-f**).

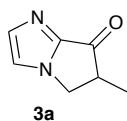

**6-methyl-5,6-dihydro-7H-pyrrolo[1,2-a]imidazole-7-one (3a):** Prepared according to general procedure C from 1-allyl-1H-imidazole-2-carbaldehyde **1a** (0.041 g, 0.30 mmol), DBU (9  $\mu$ L, 0.06 mmol) and triazolium **2** (9.0 mg, 0.030 mmol). The crude reaction mixture was purified by column chromatography (100:0 hexane:EtOAc to 90:10 hexane:EtOAc) to afford **3a** in 96% yield (0.039 g, 0.29 mmol) as a yellow oil. **<sup>1</sup>H NMR** (600 MHz, CDCl<sub>3</sub>)  $\delta$  1.40 (d,  $J$  = 7.8 Hz, 3H), 3.19-3.24 (m, 1H), 3.92 (dd,  $J$  = 12.0, 3.6 Hz, 1H), 4.58 (dd,  $J$  = 12.0, 7.8 Hz, 1H), 7.23 (app s, 1H), 7.57 (app s, 1H). **<sup>13</sup>C NMR** (151 MHz, CDCl<sub>3</sub>)  $\delta$  15.4, 44.9, 48.7, 120.0, 139.4, 146.5, 190.3. **HRMS** (ESI): Calcd. for C<sub>7</sub>H<sub>9</sub>N<sub>2</sub>O<sup>+</sup> ([M+H]<sup>+</sup>): 137.0709, Found 137.0716.

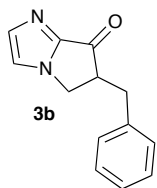

**6-benzyl-5,6-dihydro-7H-pyrrolo[1,2-a]imidazole-7-one (3b):** Prepared according to general procedure C from 1-cinnamyl-1H-imidazole-2-carbaldehyde **1b** (0.064 g, 0.30 mmol), DBU (8.97  $\mu$ L, 0.0600 mmol) and triazolium **2** (9.0 mg, 0.030 mmol). The crude reaction mixture was purified by flash column chromatography (90:10 hexanes:EtOAc) to afford **3b** in 96% yield (0.061 mg, 0.29 mmol) as an off-white solid. **<sup>1</sup>H NMR** (400 MHz, CDCl<sub>3</sub>)  $\delta$  2.82 (dd,  $J$  = 14.0, 10.4 Hz, 1H), 3.35 (dd,  $J$  = 14.0, 4.4 Hz, 1H), 3.45 (dddd,  $J$  = 10.4, 7.6, 4.4, 4.0 Hz, 1H), 3.98 (dd,  $J$  = 12.0, 4.0 Hz, 1H), 4.28 (dd,  $J$  = 12.0, 7.6 Hz, 1H), 7.11 (app s, 1H), 7.12-7.27 (m, 5H), 7.52 (app s, 1H). **<sup>13</sup>C NMR** (101 MHz, CDCl<sub>3</sub>)  $\delta$  36.1, 46.1, 51.5, 120.2, 127.1, 128.9, 129.0, 137.7, 139.5, 146.7, 188.8. **HRMS** (ESI): Calcd. for C<sub>13</sub>H<sub>13</sub>N<sub>2</sub>O<sup>+</sup> ([M+H]<sup>+</sup>): 213.1022, Found: 213.1019.

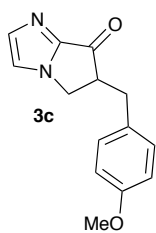

**6-(4-methoxybenzyl)-5,6-dihydro-7H-pyrrolo[1,2-a]imidazole-7-one**

**(3c):** Prepared according to general procedure C from (*E*)-1-(3-(4-methoxyphenyl)allyl)-1*H*-imidazole-2-carbaldehyde **1c** (0.048 g, 0.20 mmol), DBU (6  $\mu$ L, 0.04 mmol) and triazolium **2** (6 mg, 0.02 mmol). The crude

reaction mixture was purified by column chromatography (90:10 hexanes:EtOAc) to afford **3c** in 85% yield (0.041 g, 0.17 mmol) as an off-white solid. **<sup>1</sup>H NMR** (600 MHz, CDCl<sub>3</sub>)  $\delta$  2.87 (dd,  $J = 14.4, 9.6$  Hz, 1H), 3.32 (dd,  $J = 14.4, 4.8$  Hz, 1H), 3.43-3.49 (m, 1H), 3.77 (s, 3H), 4.03 (dd,  $J = 12.0, 3.6$  Hz, 1H), 4.33 (dd,  $J = 12.0, 7.8$  Hz, 1H), 6.82 (d,  $J = 7.8$  Hz, 2H), 7.11 (d,  $J = 7.8$  Hz, 2H), 7.16 (app s, 1H), 7.57 (app s, 1H). **<sup>13</sup>C NMR** (151 MHz, CDCl<sub>3</sub>)  $\delta$  35.2, 46.0, 51.7, 55.4, 114.4, 120.1, 129.5, 129.9, 139.5, 146.8, 158.7, 188.9. **HRMS** (ESI): Calcd. for C<sub>14</sub>H<sub>15</sub>N<sub>2</sub>O<sub>2</sub><sup>+</sup> ([M+H]<sup>+</sup>): 243.1128, Found 243.1121.

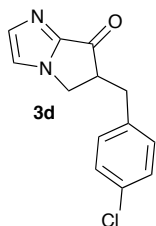

**6-(4-chlorobenzyl)-5,6-dihydro-7H-pyrrolo[1,2-a]imidazole-7-one (3d):**

Prepared according to general procedure C from (*E*)-1-(3-(4-chlorophenyl)allyl)-1*H*-imidazole-2-carbaldehyde **1d** (0.049 g, 0.20 mmol), triazolium **2** (6 mg, 0.02 mmol) and DBU (6  $\mu$ L, 0.04 mmol). The crude

reaction mixture was purified by flash column chromatography with (100:0 hexanes:EtOAc to 90:10 hexanes:EtOAc) to afford **3d** in 99% yield (0.049 g, 0.20 mmol) as an off-white solid. **<sup>1</sup>H NMR** (600 MHz, CDCl<sub>3</sub>)  $\delta$  2.88 (dd,  $J = 14.4, 10.2$  Hz, 1H), 3.32 (dd,  $J = 14.4, 4.2$  Hz, 1H), 3.43-3.49 (m, 1H), 4.00 (dd,  $J = 12.0, 4.2$  Hz, 1H), 4.36 (dd,  $J = 12.0, 7.8$  Hz, 1H), 7.13 (d,  $J = 7.8$  Hz, 2H), 7.17 (app s, 1H), 7.24 (d,  $J = 7.8$  Hz, 2H), 7.54 (app s, 1H). **<sup>13</sup>C NMR** (151 MHz, CDCl<sub>3</sub>)  $\delta$  35.3, 46.0, 51.2, 120.3, 129.1, 130.2, 132.9, 136.1, 139.5, 146.5, 188.4. **HRMS** (ESI): Calcd. for C<sub>13</sub>H<sub>12</sub>ClN<sub>2</sub>O<sup>+</sup> ([M+H]<sup>+</sup>): 247.0633, Found 247.0632.



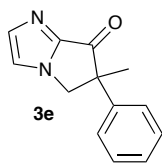

**6-methyl-6-phenyl-5,6-dihydro-7H-pyrrolo[1,2-a]imidazole-7-one (3e):**

Prepared according to general procedure C from 1-(2-phenylallyl)-1H-imidazole-2-carbaldehyde **1e** (0.042 g, 0.20 mmol), triazolium **2** (6 mg, 0.02 mmol) and DBU (6  $\mu$ L, 0.04 mmol). The crude reaction mixture was purified by flash column chromatography with (90:10 hexanes:EtOAc) to afford **3e** in 99% yield (0.042 g, 0.20 mmol) as an off white solid. **<sup>1</sup>H NMR** (600 MHz, CDCl<sub>3</sub>)  $\delta$  1.78 (s, 3H), 4.42 (d,  $J$  = 12.0 Hz, 1H), 4.66 (d,  $J$  = 12.0 Hz, 1H), 7.25-7.37 (m, 6H), 7.69 (app s, 1H). **<sup>13</sup>C NMR** (151 MHz, CDCl<sub>3</sub>)  $\delta$  23.7, 56.7, 57.2, 120.2, 125.9, 127.7, 129.1, 139.9, 141.3, 145.9, 190.3. **HRMS** (ESI): Calcd. for C<sub>13</sub>H<sub>13</sub>N<sub>2</sub>O<sup>+</sup> ([M+H]<sup>+</sup>): 213.1022, Found: 213.1029.

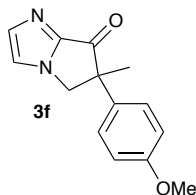

**6-(4-methoxyphenyl)-6-methyl-5,6-dihydro-7H-pyrrolo[1,2-a]imidazole-7-one (3f):** Prepared according to general procedure C from

1-(2-(4-methoxyphenyl)allyl)-1H-imidazole-2-carbaldehyde **1f** (0.048 g, 0.20 mmol), triazolium **2** (6 mg, 0.02 mmol), and DBU (6  $\mu$ L, 0.04 mmol). The crude reaction mixture was purified by flash column chromatography with (90:10 hexanes:EtOAc) to afford **3f** in 99% yield (0.048 g, 0.20 mmol) as an off white solid. **<sup>1</sup>H NMR** (600 MHz, CDCl<sub>3</sub>)  $\delta$  1.73 (s, 3H), 3.76 (s, 3H), 4.37 (d,  $J$  = 12.0 Hz, 1H), 4.61 (d,  $J$  = 12.0 Hz, 1H), 6.84 (d,  $J$  = 9.0 Hz, 2H), 7.19 (d,  $J$  = 9.0 Hz, 2H), 7.27 (d,  $J$  = 0.6 Hz, 1H), 7.65 (d,  $J$  = 0.6 Hz, 1H). **<sup>13</sup>C NMR** (151 MHz, CDCl<sub>3</sub>)  $\delta$  23.8, 55.4, 56.1, 57.2, 114.5, 120.1, 127.1, 133.3, 139.8, 146.0, 159.1, 190.6. **HRMS** (ESI): Calcd. for C<sub>14</sub>H<sub>15</sub>N<sub>2</sub>O<sub>2</sub><sup>+</sup> ([M+H]<sup>+</sup>): 243.1128, Found: 243.1123.

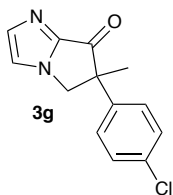

**6-(4-chlorophenyl)-6-methyl-5,6-dihydro-7H-pyrrolo[1,2-a]imidazole-**

**7-one (3g):** Prepared according to general procedure C from 1-(2-(4-chlorophenyl)allyl)-1H-imidazole-2-carbaldehyde **1g** (0.049 g, 0.20 mmol), triazolium **2** (6 mg, 0.02 mmol) and DBU (6  $\mu$ L, 0.04 mmol). The crude

reaction mixture was purified by flash column chromatography with (90:10 hexanes:EtOAc) to afford **3g** 95% yield (0.047 g, 0.19 mmol) as an off white solid. **<sup>1</sup>H NMR** (600 MHz, CDCl<sub>3</sub>)  $\delta$  1.73 (s, 3H), 4.41 (d,  $J$  = 12.0 Hz, 1H), 4.60 (d,  $J$  = 12.0 Hz, 1H), 7.16 (d,  $J$  = 8.4 Hz, 2H), 7.30 (app s, 1H), 7.44 (d,  $J$  = 8.4 Hz, 2H), 7.67 (app s, 1H). **<sup>13</sup>C NMR** (151 MHz, CDCl<sub>3</sub>) 23.8, 56.3, 56.8, 120.4, 121.8, 127.8, 132.2, 140.2, 140.3, 145.6, 189.7. **HRMS** (ESI): Calcd. for C<sub>13</sub>H<sub>12</sub>ClN<sub>2</sub>O<sup>+</sup> ([M+H]<sup>+</sup>): 247.0633, Found: 247.0638.

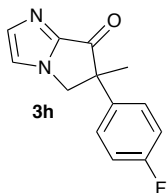

**6-(4-fluorophenyl)-6-methyl-5,6-dihydro-7H-pyrrolo[1,2-a]imidazole-**

**7-one (3h):** Prepared according to general procedure C from 1-(2-(4-fluorophenyl)allyl)-1H-imidazole-2-carbaldehyde **1h** (0.046 g, 0.20 mmol), triazolium **2** (6 mg, 0.02 mmol) and DBU (6  $\mu$ L, 0.04 mmol). The crude reaction mixture

was purified by flash column chromatography with (90:10 hexanes:EtOAc) to afford **3h** in 99% yield (0.046 g, 0.20 mmol) as an orange oil. **<sup>1</sup>H NMR** (600 MHz, CDCl<sub>3</sub>)  $\delta$  1.77 (s, 3H), 4.45 (d,  $J$  = 12.0 Hz, 1H), 4.64 (d,  $J$  = 12.0 Hz, 1H), 7.03 (dd,  $J$  = 9.0, 9.0 Hz, 2H), 7.28 (dd,  $J$  = 9.0, 5.4 Hz, 2H), 7.33 (app s, 1H), 7.69 (app s, 1H). **<sup>13</sup>C NMR** (151 MHz, CDCl<sub>3</sub>)  $\delta$  23.7, 56.1, 57.1, 115.9 (d,  $J$  = 21.4 Hz, 2C), 120.3, 127.7 (d,  $J$  = 8.2 Hz, 2C), 137.0 (d,  $J$  = 3.2 Hz, 1C), 140.1, 145.7, 162.1 (d,  $J$  = 247.2 Hz, 1C), 190.1. **<sup>19</sup>F NMR** (CDCl<sub>3</sub>, 565 MHz):  $\delta$  -115.08 (s, 1F) **HRMS** (ESI): Calcd. for C<sub>13</sub>H<sub>12</sub>FN<sub>2</sub>O<sup>+</sup> ([M+H]<sup>+</sup>): 231.0928, Found: 231.0923.

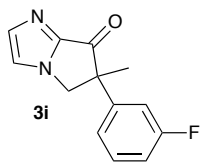

**6-(3-fluorophenyl)-6-methyl-5,6-dihydro-7H-pyrrolo[1,2-a]imidazole-7-one (3i):**

Prepared according to general procedure C from 1-(2-(3-fluorophenyl)allyl)-1H-imidazole-2-carbaldehyde **1i** (0.046 g, 0.20 mmol), triazolium **2** (6 mg, 0.02 mmol) and DBU (6  $\mu$ L, 0.04 mmol). The crude reaction mixture was purified by flash column chromatography with (90:10 hexanes:EtOAc) to afford **3i** in 99% yield (0.046 g, 0.20 mmol) as an orange oil. **<sup>1</sup>H NMR** (600 MHz, CDCl<sub>3</sub>)  $\delta$  1.78 (s, 3H), 4.45 (d,  $J$  = 12.0 Hz, 1H), 4.66 (d,  $J$  = 12.0 Hz, 1H), 6.95-7.01 (m, 1H), 7.03-7.07 (m, 2H), 7.32 (ddd, 12, 10.2, 3.6 Hz, 1H), 7.35 (app s, 1H), 7.71 (app s, 1H). **<sup>13</sup>C NMR** (151 MHz, CDCl<sub>3</sub>)  $\delta$  23.7, 56.4 (d,  $J$  = 1.66 Hz, 1C), 56.9, 113.4 (d,  $J$  = 22.6 Hz, 1C), 114.7 (d,  $J$  = 19.6 Hz, 1C), 120.4, 121.6 (d,  $J$  = 3.0 Hz, 1C), 130.7 (d,  $J$  = 8.2 Hz, 1C), 140.2, 143.7 (d,  $J$  = 6.0 Hz, 1C), 145.7, 163.1 (d,  $J$  = 247.0 Hz, 1C), 189.6. **<sup>19</sup>F NMR** (CDCl<sub>3</sub>, 565 MHz):  $\delta$  -111.98 (s, 1F). **HRMS** (ESI): Calcd. for C<sub>13</sub>H<sub>12</sub>FN<sub>2</sub>O<sup>+</sup> ([M+H]<sup>+</sup>): 231.0928, Found: 231.0929.

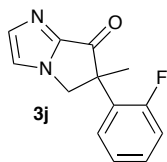

**6-(2-fluorophenyl)-6-methyl-5,6-dihydro-7H-pyrrolo[1,2-a]imidazole-7-one (3j):**

Prepared according to general procedure C from 1-(2-(2-fluorophenyl)allyl)-1H-imidazole-2-carbaldehyde **1j** (0.046 g, 0.20 mmol), triazolium **2** (6 mg, 0.02 mmol) and DBU (6  $\mu$ L, 0.04 mmol). The crude reaction mixture was purified by flash column chromatography with (90:10 hexanes:EtOAc) to afford **3j** in 99% yield (0.046 g, 0.20 mmol) as an off-white solid. **<sup>1</sup>H NMR** (600 MHz, CDCl<sub>3</sub>)  $\delta$  1.74 (s, 3H), 4.39 (d,  $J$  = 12.0 Hz, 1H), 4.53 (d,  $J$  = 12.0 Hz, 1H), 7.03 (dd,  $J$  = 12.0, 7.8 Hz, 1H), 7.15 (t,  $J$  = 7.8 Hz, 1H), 7.25 (app s, 1H), 7.29 (m, 1H), 7.48 (t,  $J$  = 7.8 Hz, 1H), 7.64 (s, 1H). **<sup>13</sup>C NMR** (151 MHz, CDCl<sub>3</sub>)  $\delta$  23.2, 54.1, 56.2 (d,  $J$  = 4.6 Hz, 1C), 116.2 (d,  $J$  = 21.6 Hz, 1C), 119.9, 124.5 (d,  $J$  = 3.2 Hz, 1C), 128.1 (d,  $J$  = 12.8 Hz, 1C), 128.2 (d,  $J$  = 4.0 Hz, 1C), 129.9 (d,  $J$  = 8.8 Hz, 1C),

139.6, 145.5, 160.7 (d,  $J = 246.8$  Hz, 1C), 189.9.  $^{19}\text{F}$  NMR ( $\text{CDCl}_3$ , 565 MHz):  $\delta$  -113.05 (s, 1F). **HRMS** (ESI): Calcd. for  $\text{C}_{13}\text{H}_{12}\text{FN}_2\text{O}^+$  ( $[\text{M}+\text{H}]^+$ ): 231.0928, Found: 231.0928.

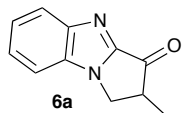

**2-methyl-1,2-dihydro-3H-benzo[d]pyrrolo[1,2-a]imidazol-3-one (6a):**

Prepared according to general procedure C from 1-allyl-1H-benzo[d]imidazole-2-carbaldehyde **5a** (0.037 g, 0.20 mmol), triazolium **2** (6 mg, 0.02 mmol) and DBU (6  $\mu\text{L}$ , 0.04 mmol). The crude reaction mixture was purified by flash column chromatography (90:10 hexanes:EtOAc) to afford **6a** in 97% yield (0.036 g, 0.19 mmol) as a white solid.  $^1\text{H}$  NMR (600 MHz,  $\text{CDCl}_3$ )  $\delta$  1.47 (d,  $J = 7.2$  Hz, 3H), 3.33 (m, 1H), 4.03 (dd,  $J = 11.4, 4.2$  Hz, 1H), 4.71 (dd,  $J = 11.4, 7.8$  Hz, 1H), 7.38 (ddd,  $J = 7.8, 7.2, 1.2$  Hz, 1H), 7.41 (ddd,  $J = 7.8, 7.2, 1.2$  Hz, 1H), 7.48 (d,  $J = 7.8$  Hz, 1H), 7.92 (d,  $J = 7.8$  Hz, 1H).  $^{13}\text{C}$  NMR (151 MHz,  $\text{CDCl}_3$ )  $\delta$  15.4, 45.0, 47.0, 111.0, 123.21, 124.8, 125.6, 132.8, 149.1, 149.4, 193.7. **HRMS** (ESI): Calcd. for  $\text{C}_{11}\text{H}_{11}\text{N}_2\text{O}^+$  ( $[\text{M}+\text{H}]^+$ ): 187.0866, Found: 187.0866.

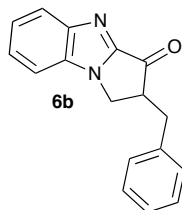

**2-benzyl-1,2-dihydro-3H-benzo[d]pyrrolo[1,2-a]imidazol-3-one (6b):**

Prepared according to general procedure C from 1-cinnamyl-1H-benzo[d]imidazole-2-carbaldehyde **5b** (0.052 g, 0.20 mmol), triazolium **2** (6 mg, 0.02 mmol) and DBU (6  $\mu\text{L}$ , 0.04 mmol). The crude reaction mixture was purified by flash column chromatography with (100:0 hexanes:EtOAc to 90:10 hexanes:EtOAc) to afford **6b** in 87% yield (0.045 g, 0.17 mmol) as a white solid.  $^1\text{H}$  NMR (400 MHz,  $\text{CDCl}_3$ )  $\delta$  2.96 (dd,  $J = 14.0, 10.0$  Hz, 1H), 3.51 (dd,  $J = 14.0, 4.4$  Hz, 1H), 3.61-3.70 (m, 1H), 4.18 (dd,  $J = 11.6, 4.0$  Hz, 1H), 4.51 (dd,  $J = 11.6, 7.6$  Hz, 1H), 7.24-7.30 (m, 3H), 7.31-7.37 (m, 2H), 7.38-7.49 (m, 3H), 7.94 (dd,  $J = 6.8, 2.8$  Hz, 1H).  $^{13}\text{C}$  NMR (101 MHz,  $\text{CDCl}_3$ )  $\delta$  36.1, 44.6,

51.6, 111.1, 123.4, 125.0, 125.8, 127.3, 128.9, 129.1, 132.9, 137.6, 149.2, 149.5, 192.2.

**HRMS** (ESI): Calcd. for  $C_{17}H_{15}N_2O^+$  ( $[M+H]^+$ ): 263.1179, Found: 263.1177.

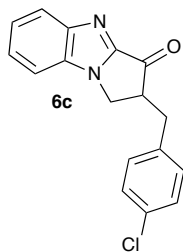

**2-(4-chlorobenzyl)-1,2-dihydro-3H-benzo[d]pyrrolo[1,2-a]imidazol-3-one (6c):** Prepared according to general procedure C from (*E*)-1-(3-(4-chlorophenyl)allyl)-1*H*-benzo[d]imidazole-2-carbaldehyde **5c** (0.059 g, 0.20 mmol), triazolium **2** (6 mg, 0.02 mmol) and DBU (6  $\mu$ L, 0.04 mmol).

The crude reaction mixture was purified by flash column chromatography with (100:0 hexanes:EtOAc to 90:10 hexanes:EtOAc) as eluent to afford **6c** in 84% yield (0.050 g, 0.17 mmol).  **$^1H$  NMR** (600 MHz,  $d_6$ -DMSO)  $\delta$  3.00 (dd,  $J$  = 14.4, 10.8 Hz, 1H), 3.28 (dd,  $J$  = 14.4, 4.8 Hz, 1H), 3.75-3.82 (m, 1H), 4.21 (dd,  $J$  = 11.4, 4.2 Hz, 1H), 4.56 (dd,  $J$  = 11.4, 7.8 Hz, 1H), 7.35-7.41 (m, 5H), 7.42-7.45 (m, 1H), 7.76 (d,  $J$  = 8.4 Hz, 1H), 7.85 (d,  $J$  = 8.4 Hz, 1H).  **$^{13}C$  NMR** (101 MHz,  $d_6$ -DMSO)  $\delta$  34.1, 44.6, 50.8, 112.3, 122.0, 124.3, 124.9, 128.5, 130.8, 131.3, 132.7, 137.6, 148.5, 149.6, 193.5. **HRMS** (ESI): Calcd. for  $C_{17}H_{14}ClN_2O^+$  ( $[M+H]^+$ ): 297.0789, Found: 297.0789.

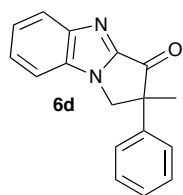

**2-methyl-2-phenyl-1,2-dihydro-3H-benzo[d]pyrrolo[1,2-a]imidazol-3-one (6d):** Prepared according to general procedure C from 1-(2-phenylallyl)-1*H*-benzo[d]imidazole-2-carbaldehyde **5d** (0.052 g, 0.20 mmol), triazolium **2** (6 mg, 0.02 mmol) and DBU (6  $\mu$ L, 0.04 mmol). The crude reaction

mixture was purified by flash column chromatography with (100:0 hexanes:EtOAc to 90:10 hexanes:EtOAc) as eluent to afford **6d** in 93% yield (0.048 g, 0.19 mmol) as a white solid.  **$^1H$  NMR** (600 MHz,  $CDCl_3$ )  $\delta$  1.86 (s, 3H), 4.57 (d,  $J$  = 11.4 Hz, 1H), 4.84 (d,  $J$  = 11.4 Hz, 1H), 7.25-7.36 (m, 5H), 7.45 (ddd,  $J$  = 8.4, 7.8, 1.2 Hz, 1H), 7.48 (ddd,  $J$  = 8.4, 7.8, 1.2 Hz, 1H), 7.57

(dd,  $J = 7.8, 1.2$  Hz, 1H), 8.01 (dd,  $J = 7.8, 1.2$  Hz, 1H).  $^{13}\text{C}$  NMR (151 MHz,  $\text{CDCl}_3$ )  $\delta$  23.8, 55.5, 56.7, 111.2, 123.4, 125.0, 125.9, 125.93, 127.9, 129.2, 132.8, 140.9, 148.6, 149.8, 193.8. HRMS (ESI): Calcd. for  $\text{C}_{17}\text{H}_{15}\text{N}_2\text{O}^+$  ( $[\text{M}+\text{H}]^+$ ): 263.1179, Found: 263.1181.

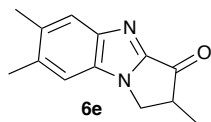

**2,6,7-trimethyl-1,2-dihydro-3H-benzo[d]pyrrolo[1,2-a]imidazol-3-one (6e):** Prepared according to general procedure C from 1-allyl-5,6-

dimethyl-1H-benzo[d]imidazole-2-carbaldehyde **5e** (0.021 g, 0.10 mmol), triazolium **2** (3 mg, 0.01 mmol) and DBU (2.9  $\mu\text{L}$ , 0.020 mmol). The crude reaction mixture was purified by flash column chromatography with (100:0 hexanes:EtOAc to 90:10 hexanes:EtOAc) to afford **6e** in 66% yield (0.014 g, 0.066 mmol) as a white solid.  $^1\text{H}$  NMR (600 MHz,  $\text{CDCl}_3$ )  $\delta$  1.48 (d,  $J = 7.2$  Hz, 3H), 2.39 (s, 3H), 2.41 (s, 3H), 3.29-3.35 (m, 1H), 3.99 (dd,  $J = 11.4, 4.2$  Hz, 1 H), 4.67 (dd,  $J = 11.4, 7.8$  Hz, 1H), 7.26 (s, 1H), 7.68 (s, 1H).  $^{13}\text{C}$  NMR (151 MHz,  $\text{CDCl}_3$ )  $\delta$  1.1, 15.5, 20.7, 20.9, 45.0, 47.0, 110.7, 122.6, 131.6, 134.6, 135.9, 148.5, 193.4. HRMS (ESI): Calcd. for  $\text{C}_{13}\text{H}_{15}\text{N}_2\text{O}^+$  ( $[\text{M}+\text{H}]^+$ ): 215.1179, Found: 215.1178.

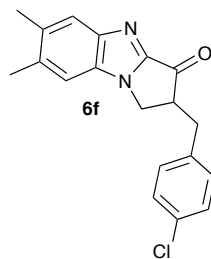

**2-(4-chlorobenzyl)-6,7-dimethyl-1,2-dihydro-3H-benzo[d]pyrrolo[1,2-a]imidazol-3-one (6f):** Prepared according to general procedure C (*E*)-1-(3-(4-chlorophenyl)allyl)-5,6-dimethyl-1H-benzo[d]imidazole-2-carbaldehyde **5f** (0.032 g, 0.10 mmol), triazolium **2**

(3 mg, 0.01 mmol) and DBU (3  $\mu\text{L}$ , 0.02 mmol). The crude reaction mixture was purified by column chromatography with (100:0 hexanes:EtOAc to 90:10 hexanes:EtOAc) to afford **6f** in 88% yield (0.028 g, 0.088 mmol) as a white solid.  $^1\text{H}$  NMR (600 MHz,  $\text{CDCl}_3$ )  $\delta$  2.38 (app s, 6H), 2.95 (dd,  $J = 14.4, 10.2$  Hz, 1H), 3.41 (dd,  $J = 14.4, 4.2$  Hz, 1H), 3.54-3.60 (m, 1H), 4.05 (dd,  $J = 11.4, 3.6$  Hz, 1H), 4.44 (dd,  $J = 11.4, 7.2$  Hz, 1H), 7.18 (d,  $J = 7.8$  Hz, 2H), 7.20 (s, 1H),

7.28 (d,  $J = 7.8$  Hz, 2H), 7.66 (s, 1H).  $^{13}\text{C}$  NMR (151 MHz,  $\text{CDCl}_3$ )  $\delta$  20.8, 21.0, 35.5, 44.3, 51.4, 110.7, 122.7, 129.2, 130.3, 130.8, 131.6, 133.1, 134.9, 136.2, 148.3, 148.4, 191.5. HRMS (ESI): Calcd. for  $\text{C}_{19}\text{H}_{18}\text{ClN}_2\text{O}^+$  ( $[\text{M}+\text{H}]^+$ ): 325.1102, Found: 325.1103.

#### General Procedure D: Enantioselective synthesis of **3e-j**

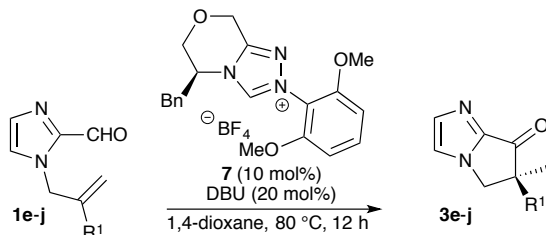

In a nitrogen-filled glovebox, to a 1-dram vial was added triazolium **7** (0.010 mmol, 0.10 equiv), the appropriate *N*-allylimidazole-2-carboxaldehyde **1e-j** (0.10 mmol, 1.0 equiv), DBU (3  $\mu\text{L}$ , 0.02 mmol, 0.2 equiv), and 1,4-dioxane (0.2 mL, 0.5 M). The vial was sealed with a teflon-lined septum cap. The reaction vessel was removed from the glovebox and the reaction mixture was stirred at 80  $^\circ\text{C}$  for 12 h. The reaction was cooled to room temperature and filtered through a plug of silica gel with EtOAc as eluent. The filtrate was concentrated under reduced pressure. The crude product was purified by flash column silica gel chromatography (hexane:EtOAc) to give the appropriate dihydropyrroloimidazolones (**3e-j**).

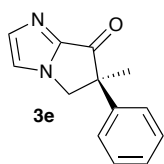

#### (*S*)-6-methyl-6-phenyl-5,6-dihydro-7*H*-pyrrolo[1,2-*a*]imidazole-7-one

**(3e)**: Prepared according to general procedure D from 1-(2-phenylallyl)-1*H*-imidazole-2-carbaldehyde **1e** (0.021 g, 0.10 mmol), triazolium **7** (4 mg, 0.01 mmol) and DBU (3  $\mu\text{L}$ , 0.02 mmol). The crude reaction mixture was purified by flash

column chromatography with (90:10 hexanes:EtOAc) to afford **3e** in 90% yield (0.019 g, 0.090 mmol) as an off white solid. The enantiomeric excess was determined by HPLC analysis (254 nm, 25 °C)  $t_R$  27.1 min (major);  $t_R$  32.4 min (minor) [Chiracel AD-H (0.46 cm x 25 cm)(from Daicel Chemical Ind., hexane/*i*-PrOH, 90:10, 1.0 mL/min] to be 71% ee.  $[\alpha]_D^{24} = -188.8^\circ$  (c 0.63, CHCl<sub>3</sub>). NMR spectra is consistent with racemic spectra above.

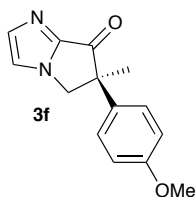

**(S)-6-(4-methoxyphenyl)-6-methyl-5,6-dihydro-7H-pyrrolo[1,2-a]imidazole-7-one (3f):** Prepared according to general procedure D from

1-(2-(4-methoxyphenyl)allyl)-1*H*-imidazole-2-carbaldehyde **1f** (0.024 g, 0.10 mmol), triazolium **7** (4 mg, 0.01 mmol), and DBU (3  $\mu$ L, 0.02 mmol). The crude reaction mixture was purified by flash column chromatography with (90:10 hexanes:EtOAc) to afford **3f** in 98% yield (0.024 g, 0.097 mmol) as an off white solid. The enantiomeric excess was determined by HPLC analysis (254 nm, 25 °C)  $t_R$  44.3 min (major); 56.9 min (minor) [Chiracel AD-H (0.46 cm x 25 cm)(from Daicel Chemical Ind., Ltd.) hexane/*i*-PrOH, 90:10, 1.0 mL/min] to be 79% ee.  $[\alpha]_D^{23} = -84.9^\circ$  (c 1.06, CHCl<sub>3</sub>). NMR spectra is consistent with racemic spectra above.

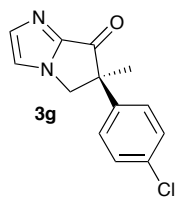

**(S)-6-(4-chlorophenyl)-6-methyl-5,6-dihydro-7H-pyrrolo[1,2-a]imidazole-7-one (3g):** Prepared according to general procedure D from

1-(2-(4-chlorophenyl)allyl)-1*H*-imidazole-2-carbaldehyde **1g** (0.025 g, 0.10 mmol), triazolium **7** (4 mg, 0.01 mmol) and DBU (3  $\mu$ L, 0.02 mmol). The crude reaction mixture was purified by flash column chromatography with (90:10 hexanes:EtOAc) to afford **3g** 96% yield (0.024 g, 0.096 mmol) as an off white solid. The enantiomeric excess was determined by HPLC analysis (254 nm, 25 °C)  $t_R$  36.1 min (major); 45.7 min (minor)



[Chiracel AD-H (0.46 cm x 25 cm)(from Daicel Chemical Ind., Ltd.) hexane/*i*-PrOH, 90:10, 1.0 mL/min] to be 67% ee.  $[\alpha]_D^{22} = -156.9^\circ$  (c 1.02, CHCl<sub>3</sub>). NMR spectra is consistent with racemic spectra above.

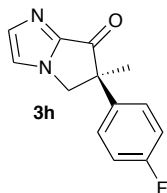

**(S)-6-(4-fluorophenyl)-6-methyl-5,6-dihydro-7H-pyrrolo[1,2-a]imidazole-7-one (3h):** Prepared according to general procedure D from

1-(2-(4-fluorophenyl)allyl)-1*H*-imidazole-2-carbaldehyde **1h** (0.023 g, 0.10 mmol), triazolium **7** (4 mg, 0.01 mmol) and DBU (3  $\mu$ L, 0.02 mmol). The crude reaction mixture was purified by flash column chromatography with (90:10 hexanes:EtOAc) to afford **3h** in 81% yield (0.019 g, 0.083 mmol) as an orange oil. The enantiomeric excess was determined by HPLC analysis (254 nm, 25  $^\circ$ C)  $t_R$  33.3 min (major);  $t_R$  39.8 min (minor) [Chiracel AD-H (0.46 cm x 25 cm)(from Daicel Chemical Ind., Ltd.) hexane/*i*-PrOH, 90:10, 1.0 mL/min] to be 75% ee.  $[\alpha]_D^{23} = -40.5^\circ$  (c 0.84, CHCl<sub>3</sub>). NMR spectra is consistent with racemic spectra above.

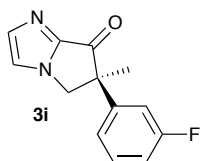

**(S)-6-(3-fluorophenyl)-6-methyl-5,6-dihydro-7H-pyrrolo[1,2-a]imidazole-7-one (3i):** Prepared according to general procedure D from

1-(2-(3-fluorophenyl)allyl)-1*H*-imidazole-2-carbaldehyde **1i** (0.023 g, 0.10 mmol), triazolium **7** (4 mg, 0.01 mmol) and DBU (3  $\mu$ L, 0.02 mmol). The crude reaction mixture was purified by flash column chromatography with (90:10 hexanes:EtOAc) to afford **3i** in 93% yield (0.021 g, 0.093 mmol) as an orange oil. The enantiomeric excess was determined by HPLC analysis (254 nm, 25  $^\circ$ C)  $t_R$  29.2 min (major);  $t_R$  33.5 min (minor) [Chiracel AD-H (0.46 cm x 25 cm)(from Daicel Chemical Ind., Ltd.) hexane/*i*-PrOH, 90:10,

1.0 mL/min] to be 67% ee.  $[\alpha]_D^{23} = -51.2^\circ$  (c 1.01,  $\text{CHCl}_3$ ). NMR spectra is consistent with racemic spectra above.

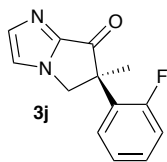

**(S)-6-(2-fluorophenyl)-6-methyl-5,6-dihydro-7H-pyrrolo[1,2-a]imidazole-7-one (3j):** Prepared according to general procedure D from 1-(2-(2-fluorophenyl)allyl)-1H-imidazole-2-carbaldehyde **1j** (0.023 g, 0.10

mmol), triazolium **7** (4 mg, 0.01 mmol) and DBU (3  $\mu\text{L}$ , 0.02 mmol). The crude reaction mixture was purified by flash column chromatography with (90:10 hexanes:EtOAc) to afford **3j** in 39% yield (0.089 g, 0.038 mmol) as an off-white solid. The enantiomeric excess was determined by HPLC analysis (254 nm, 25  $^\circ\text{C}$ )  $t_R$  29.0 min (major);  $t_R$  35.4 min (minor) [Chiracel AD-H (0.46 cm x 25 cm)(from Daicel Chemical Ind., Ltd.) hexanes/*i*-PrOH, 90:10, 1.0 mL/min] to be 56% ee.  $[\alpha]_D^{23} = +28.6^\circ$  (c 0.35,  $\text{CHCl}_3$ ). NMR spectra is consistent with racemic spectra above.

### Representative Procedure for Rhodium-Catalysed Hydroacylation of 1a

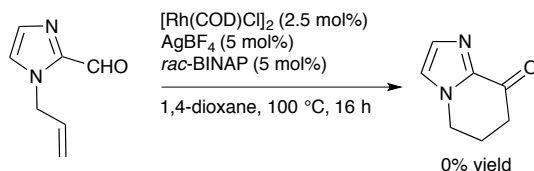

In a nitrogen-filled glovebox, 1-allyl-1H-imidazole-2-carboxaldehyde (13.6 mg, 0.100 mmol, 1.00 equiv),  $[\text{Rh}(\text{COD})\text{Cl}]_2$  (1.2 mg, 0.0025 mmol, 0.025 equiv), racemic-BINAP (3.1 mg, 0.0050 mmol, 0.050 equiv),  $\text{AgBF}_4$  (1.0 mg, 0.0050 mmol, 0.050 equiv) and 1,4-dioxane (0.25 mL, 0.40M) were added to 1-dram vial. The vial was sealed with a Teflon-lined septum cap and removed from the glovebox. The reaction mixture was stirred at 100  $^\circ\text{C}$  in an oil bath for 16 h. The vial was removed from the oil bath and allowed to cool to room

temperature. The reaction mixture was filtered through a short plug of silica gel with 100% EtOAc as eluent. The crude reaction mixture was concentrated under reduced pressure. The crude residue was analyzed by  $^1\text{H}$  NMR spectroscopy with dibromomethane as the internal standard. Only unreacted starting material was observed by  $^1\text{H}$  NMR spectroscopy.

### **Evaluation of Rhodium-Catalysed Hydroacylation of **1a** by $^{31}\text{P}$ NMR Spectroscopy**

In a nitrogen-filled glovebox, *rac*-BINAP (6.2 mg, 0.010 mmol, 0.050 equiv) and  $\text{CDCl}_3$  (0.5 mL) was added to 1-dram vial and stirred until *rac*-BINAP fully dissolved. The reaction mixture was then transferred to an NMR tube and sealed. A  $^{31}\text{P}$  spectrum was obtained to give spectrum A in Figure S1. The sealed NMR tube was returned to the glovebox. To a 1-dram vial was added  $\text{Rh}(\text{COD})_2\text{BF}_4$  (4.1 mg, 0.010 mmol, 0.050 equiv) and the solution containing *rac*-BINAP in  $\text{CDCl}_3$ , and the resulting solution was stirred for 15 minutes at room temperature. After stirring, the solution was returned to the NMR tube, sealed, and spectrum B in Figure S1 was obtained, showing that the formation of  $[\text{Rh}(\text{COD})(\textit{rac}\text{-BINAP})]^+\text{BF}_4^-$ . The NMR tube was returned to the nitrogen-filled glovebox. To a 1-dram vial containing 1-allyl-1*H*-imidazole-2-carboxaldehyde **1a** (27.2 mg, 0.200 mmol, 1.00 equiv) was added the solution containing  $[\text{Rh}(\text{COD})(\textit{rac}\text{-BINAP})]^+\text{BF}_4^-$ , and the resulting solution was stirred for 15 minutes. After stirring, the solution was returned to the NMR tube, sealed, and spectrum C in Figure S1 was obtained, showing the displacement of *rac*-BINAP from the rhodium.

Figure S1

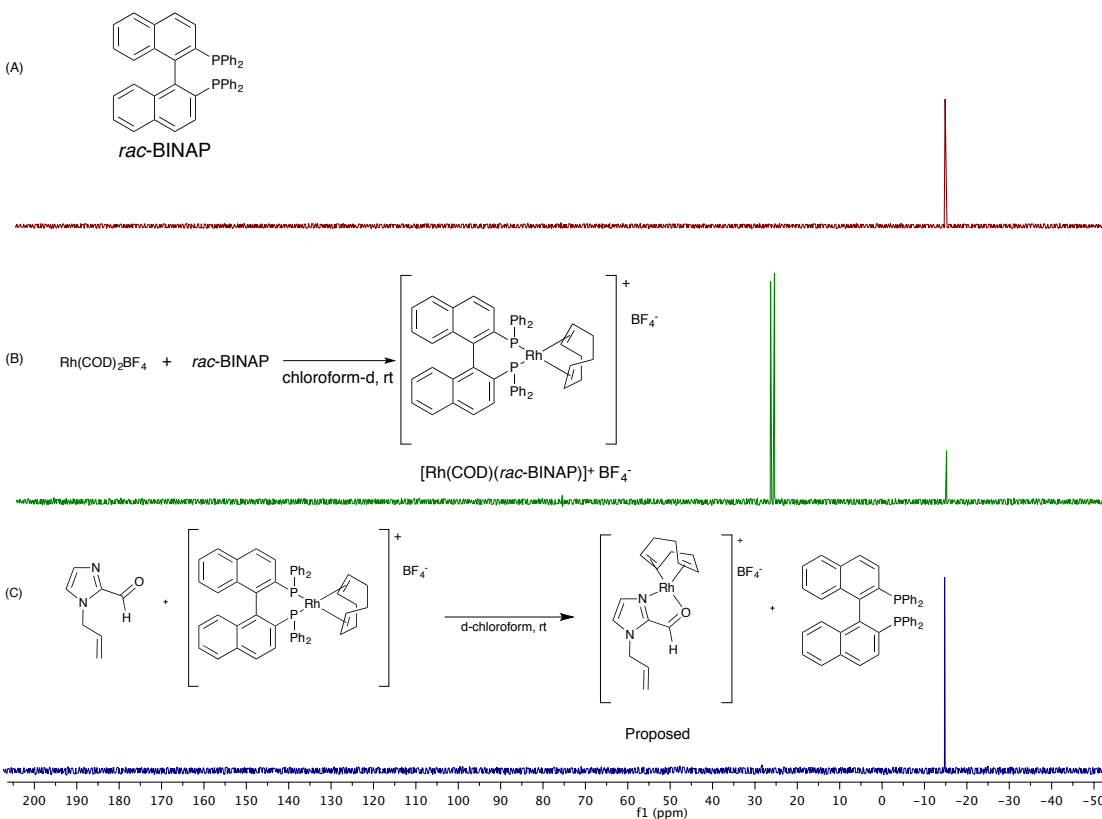

## Synthesis of Diketone S1

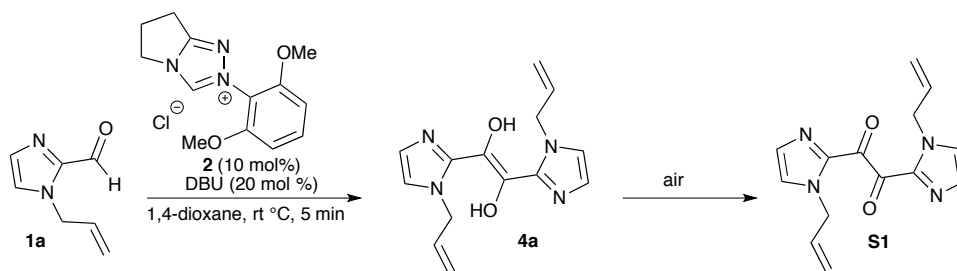

1,2-Bis(1-allyl-1*H*-imidazol-2-yl)ethane-1,2-dione was prepared according to the following procedure from carboxaldehyde **1a**. In a nitrogen-filled glovebox, to a 1-dram vial was added triazolium **2** (9.0 mg, 0.030 mmol, 0.10 equiv), 1-allyl-1*H*-imidazole-2-carboxaldehyde **1a** (0.041 g, 0.30 mmol, 1.0 equiv), DBU (9  $\mu\text{L}$ , 0.06 mmol, 0.2 equiv), and

1,4-dioxane (0.6 mL, 0.5 M). The vial was sealed with a teflon-lined septum cap. The reaction vessel was removed from the glovebox, and the reaction mixture was stirred at rt for 5 minutes. The reaction was cooled to room temperature, exposed to air, and filtered through a plug of silica gel with EtOAc as eluent. The filtrate was concentrated under reduced pressure. The reaction mixture was purified by column chromatography (100% DCM) to afford diketone **S1** in 90% yield (0.037 g, 0.13 mmol) as an off-white solid. **<sup>1</sup>H NMR** (400 MHz, CDCl<sub>3</sub>) δ 5.08 (d, *J* = 6.0 Hz, 4H), 5.17 (dd, *J* = 17.2, 1.2 Hz, 2H), 5.24 (dd, *J* = 10.4, 1.2 Hz, 2H), 5.93-6.04 (m, 2H), 7.14 (d, *J* = 0.8 Hz, 2H), 7.20 (d, *J* = 0.8 Hz, 2H). **<sup>13</sup>C NMR** (101 MHz, CDCl<sub>3</sub>) δ 50.7, 119.5, 126.3, 132.1, 132.2, 140.3, 183.2. **HRMS** (ESI): Calcd. for C<sub>14</sub>H<sub>15</sub>N<sub>4</sub>O<sub>2</sub><sup>+</sup> ([M+H]<sup>+</sup>): 271.1190, Found: 271.1194.

### Evaluation of NHC-Catalysed Hydroacylation of **1a** by <sup>1</sup>H NMR Spectroscopy

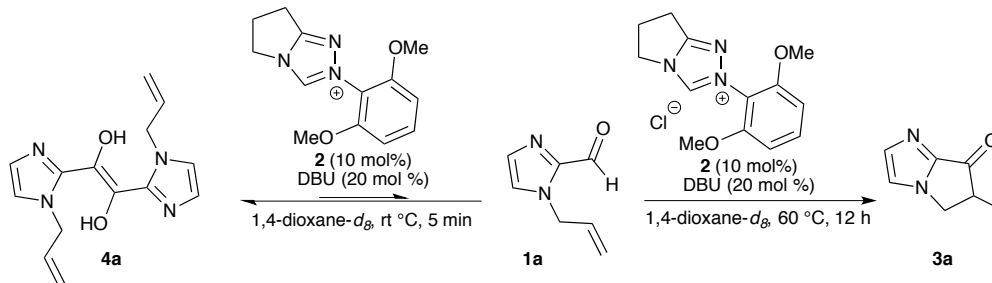

In a nitrogen-filled glovebox, to a 1-dram vial was added triazolium **2** (7.1 mg, 0.025 mmol, 0.10 equiv), 1-allyl-1H-imidazole-2-carboxaldehyde **1a** (34.0 mg, 0.250 mmol, 1.0 equiv), 1,4-dioxane-*d*<sub>8</sub> (0.5 mL, 0.5 M), and finally DBU (7.5 μL, 0.050 mmol, 0.20 equiv). The reaction mixture was immediately added to a NMR tube and sealed with a teflon-lined septum cap. The reaction vessel was removed from the glovebox and immediately inserted into the Bruker Avance III 600 that was preheated to 60 °C. Spectra were collected every 10 seconds for the first 42 minutes, every 27 seconds for the following 112 minutes, every 57

seconds for the next 237 minutes, and every 117 seconds for the remainder of the reaction time. Within the time taken to prepare the sample, **1a** is converted to **4a** at room temperature. Upon heating the mixture containing **4a** at 60 °C in the NMR spectrometer, **4a** is converted to hydroacylation product **3a** over the course of the experiment as shown in Figure S2. Upon completion of the NMR experiment, the reaction was cooled to room temperature and filtered through a plug of silica gel with EtOAc as eluent. The filtrate was concentrated under reduced pressure. The crude product was purified by flash column silica gel chromatography (90:10 hexane:EtOAc) to give **3a** in 96% yield (32 mg, 0.24 mmol).

**Figure S2**

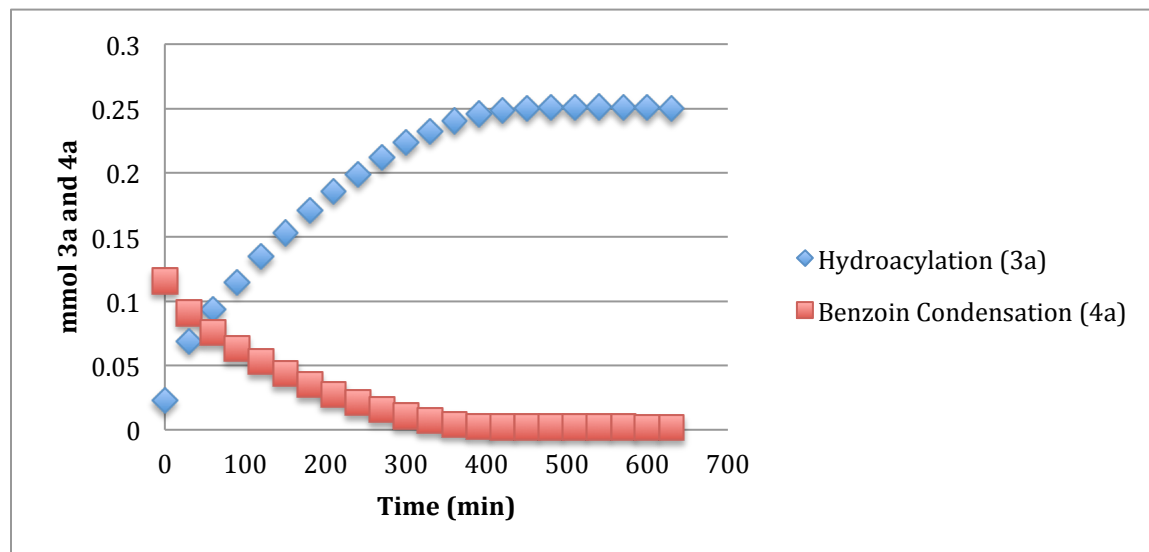

## References

1. E. Tayama, N. Naganuma, H. Iwamoto and E. Hasegawa, *Chem Commun*, 2014, **50**, 6860-6862.
2. C. B. Tripathi and S. Mukherjee, *Angewandte Chemie International Edition*, 2013, **52**, 8450-8453.
3. A. F. Alasmary, M. A. Snelling, E. M. Zain, M. A. Alafeefy, S. A. Awaad and N. Karodia, *Molecules*, 2015, **20**.

4. M. Schedler, R. Frohlich, C. G. Daniliuc and F. Glorius, *Eur J Org Chem*, 2012, 4164-4171.
5. I. Piel, M. Steinmetz, K. Hirano, R. Fröhlich, S. Grimme and F. Glorius, *Angewandte Chemie International Edition*, 2011, **50**, 4983-4987.
6. X.-W. Du, A. Ghosh and L. M. Stanley, *Organic Letters*, 2014, **16**, 4036-4039.
7. J. O'Shaughnessy and F. Aldabbagh, *Synthesis-Stuttgart*, 2005, 1069-1076.

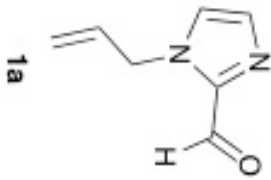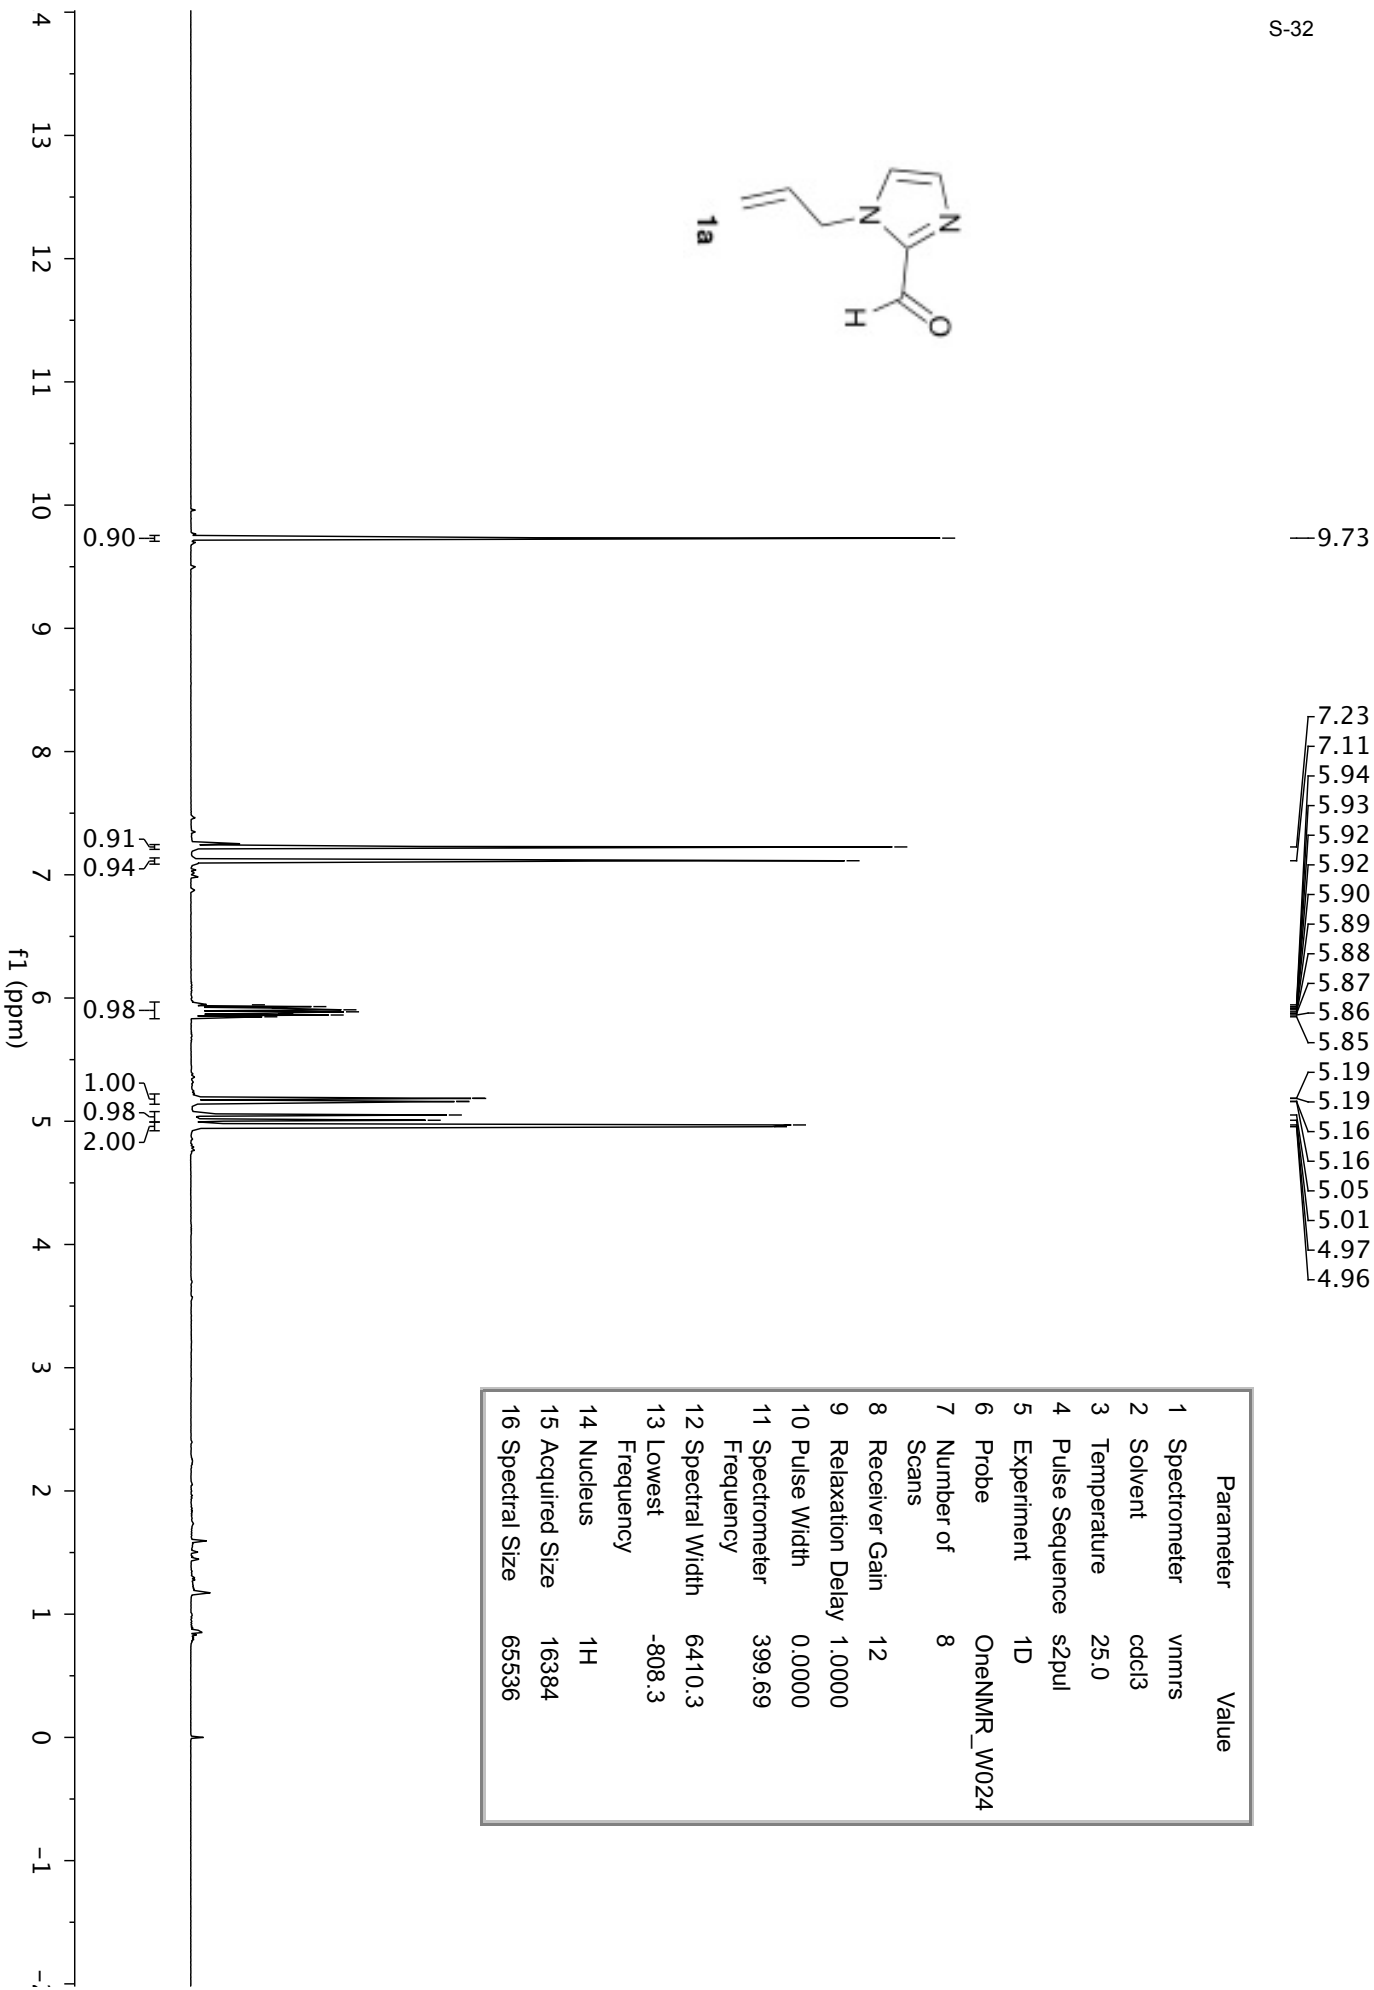



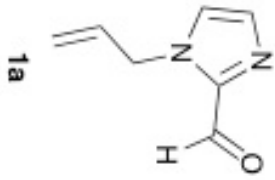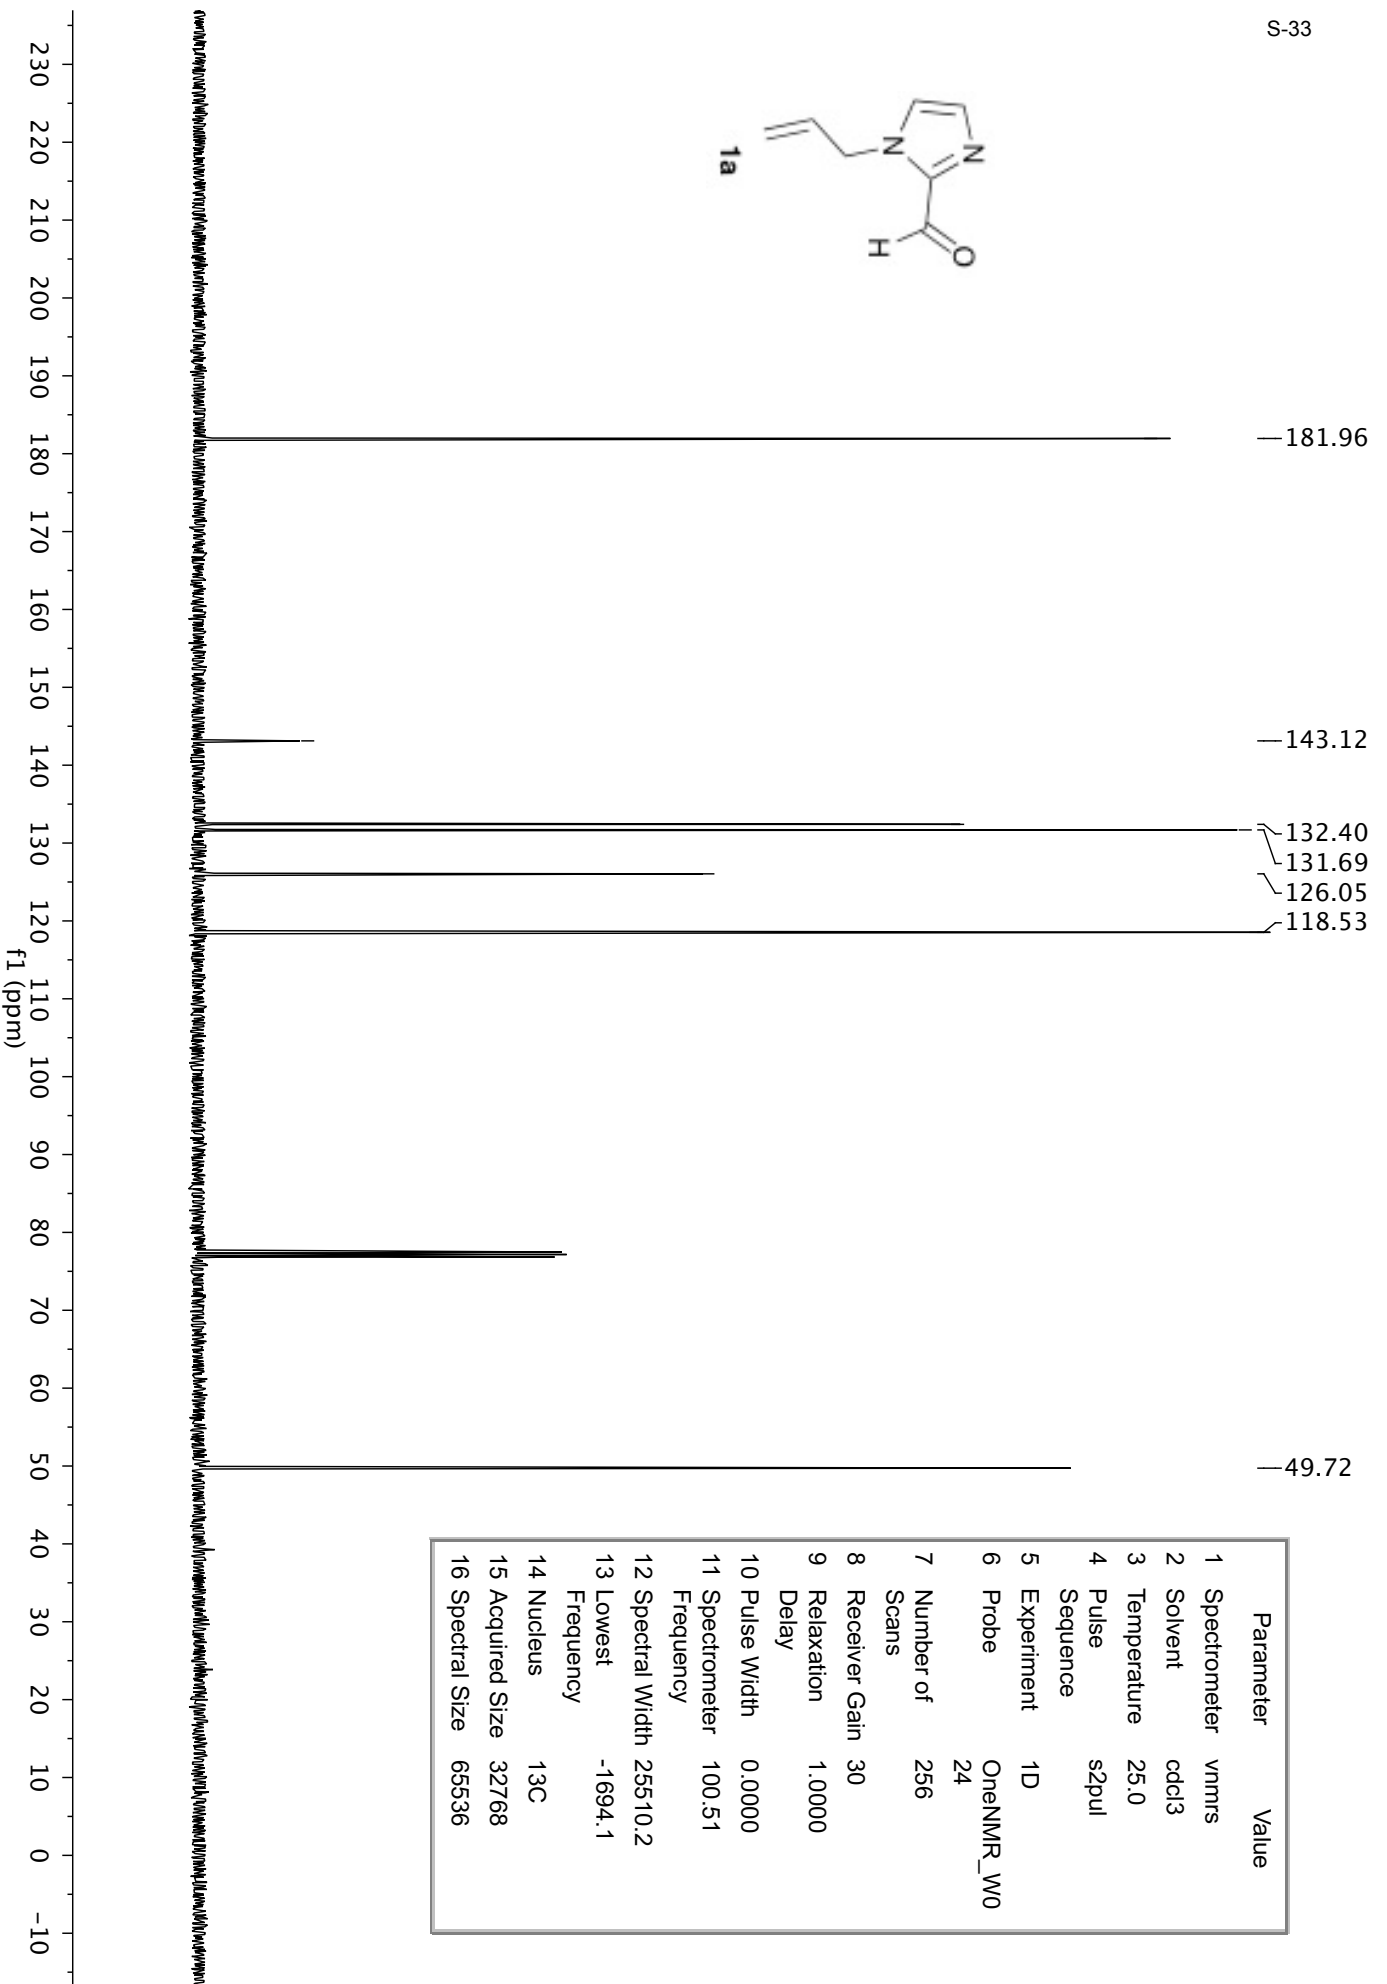

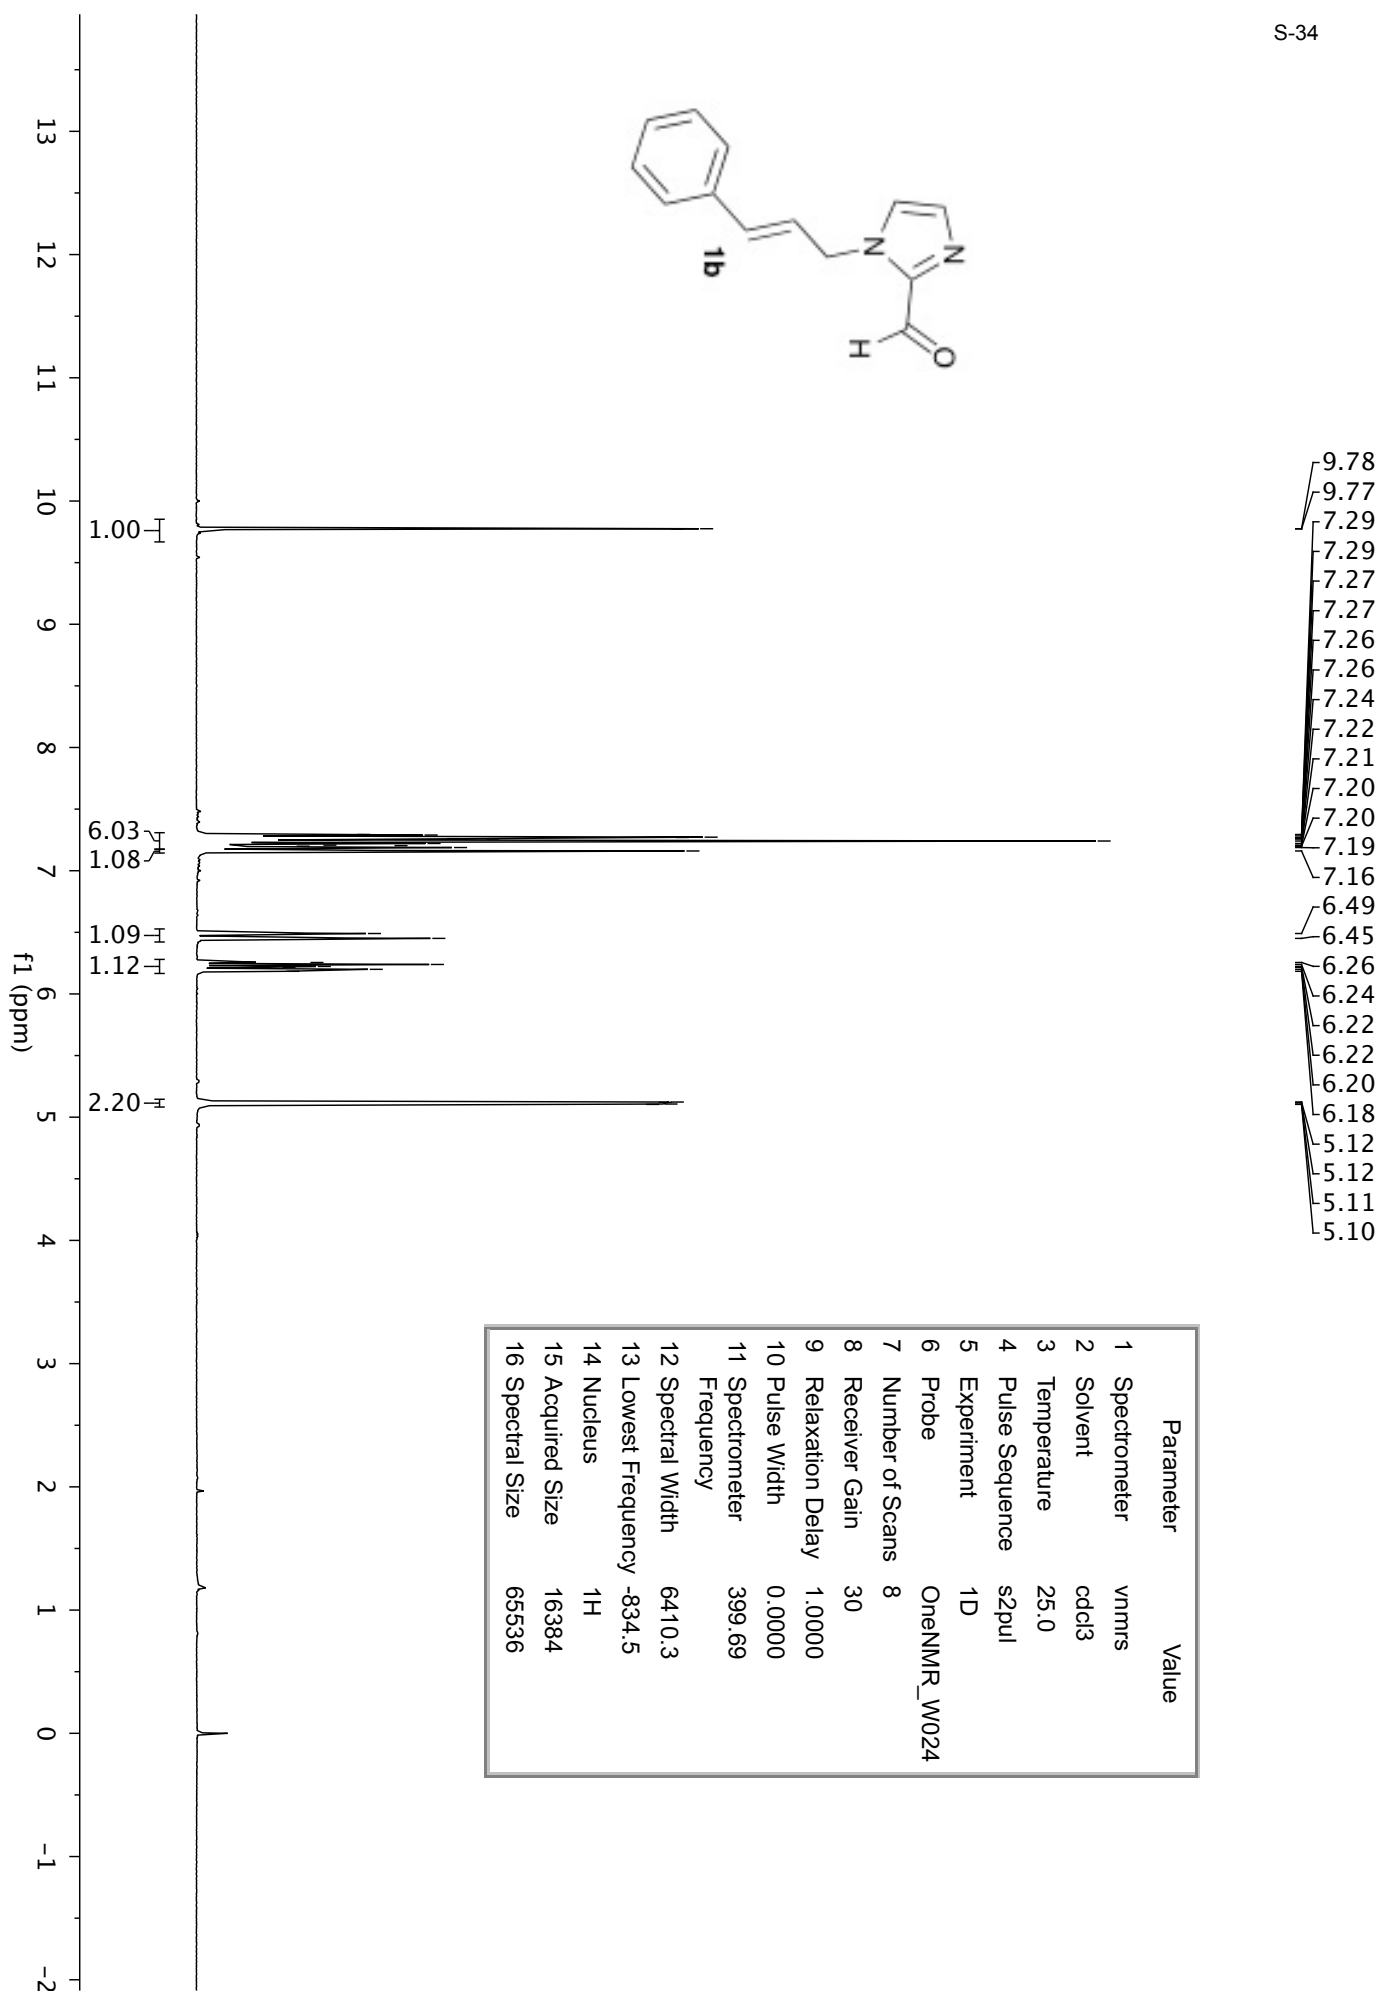

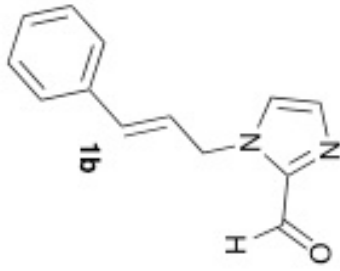

—182.25

143.28  
 135.79  
 134.34  
 131.93  
 128.78  
 128.44  
 126.72  
 125.98  
 123.27

—49.54

| Parameter                 | Value           |
|---------------------------|-----------------|
| 1 Spectrometer            | vmrns           |
| 2 Solvent                 | cdcl3           |
| 3 Temperature             | 25.0            |
| 4 Pulse Sequence          | s2pul           |
| 5 Experiment              | 1D              |
| 6 Probe                   | OneNMR_w024     |
| 7 Number of Scans         | 256             |
| 8 Receiver Gain           | 30              |
| 9 Relaxation Delay        | 1.0000          |
| 10 Pulse Width            | 0.0000          |
| 11 Spectrometer Frequency | 100.51          |
| 12 Spectral Width         | 25510.2         |
| 13 Lowest Frequency       | -1687.7         |
| 14 Nucleus                | <sup>13</sup> C |
| 15 Acquired Size          | 32768           |
| 16 Spectral Size          | 65536           |

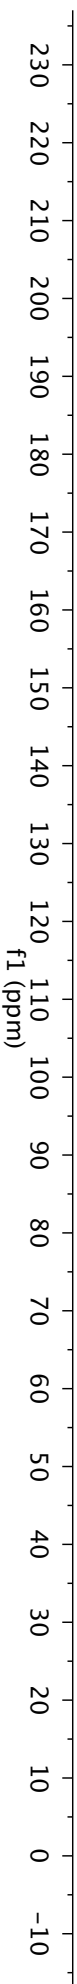

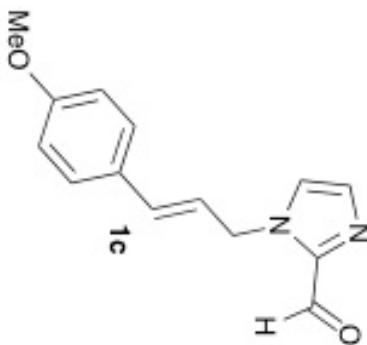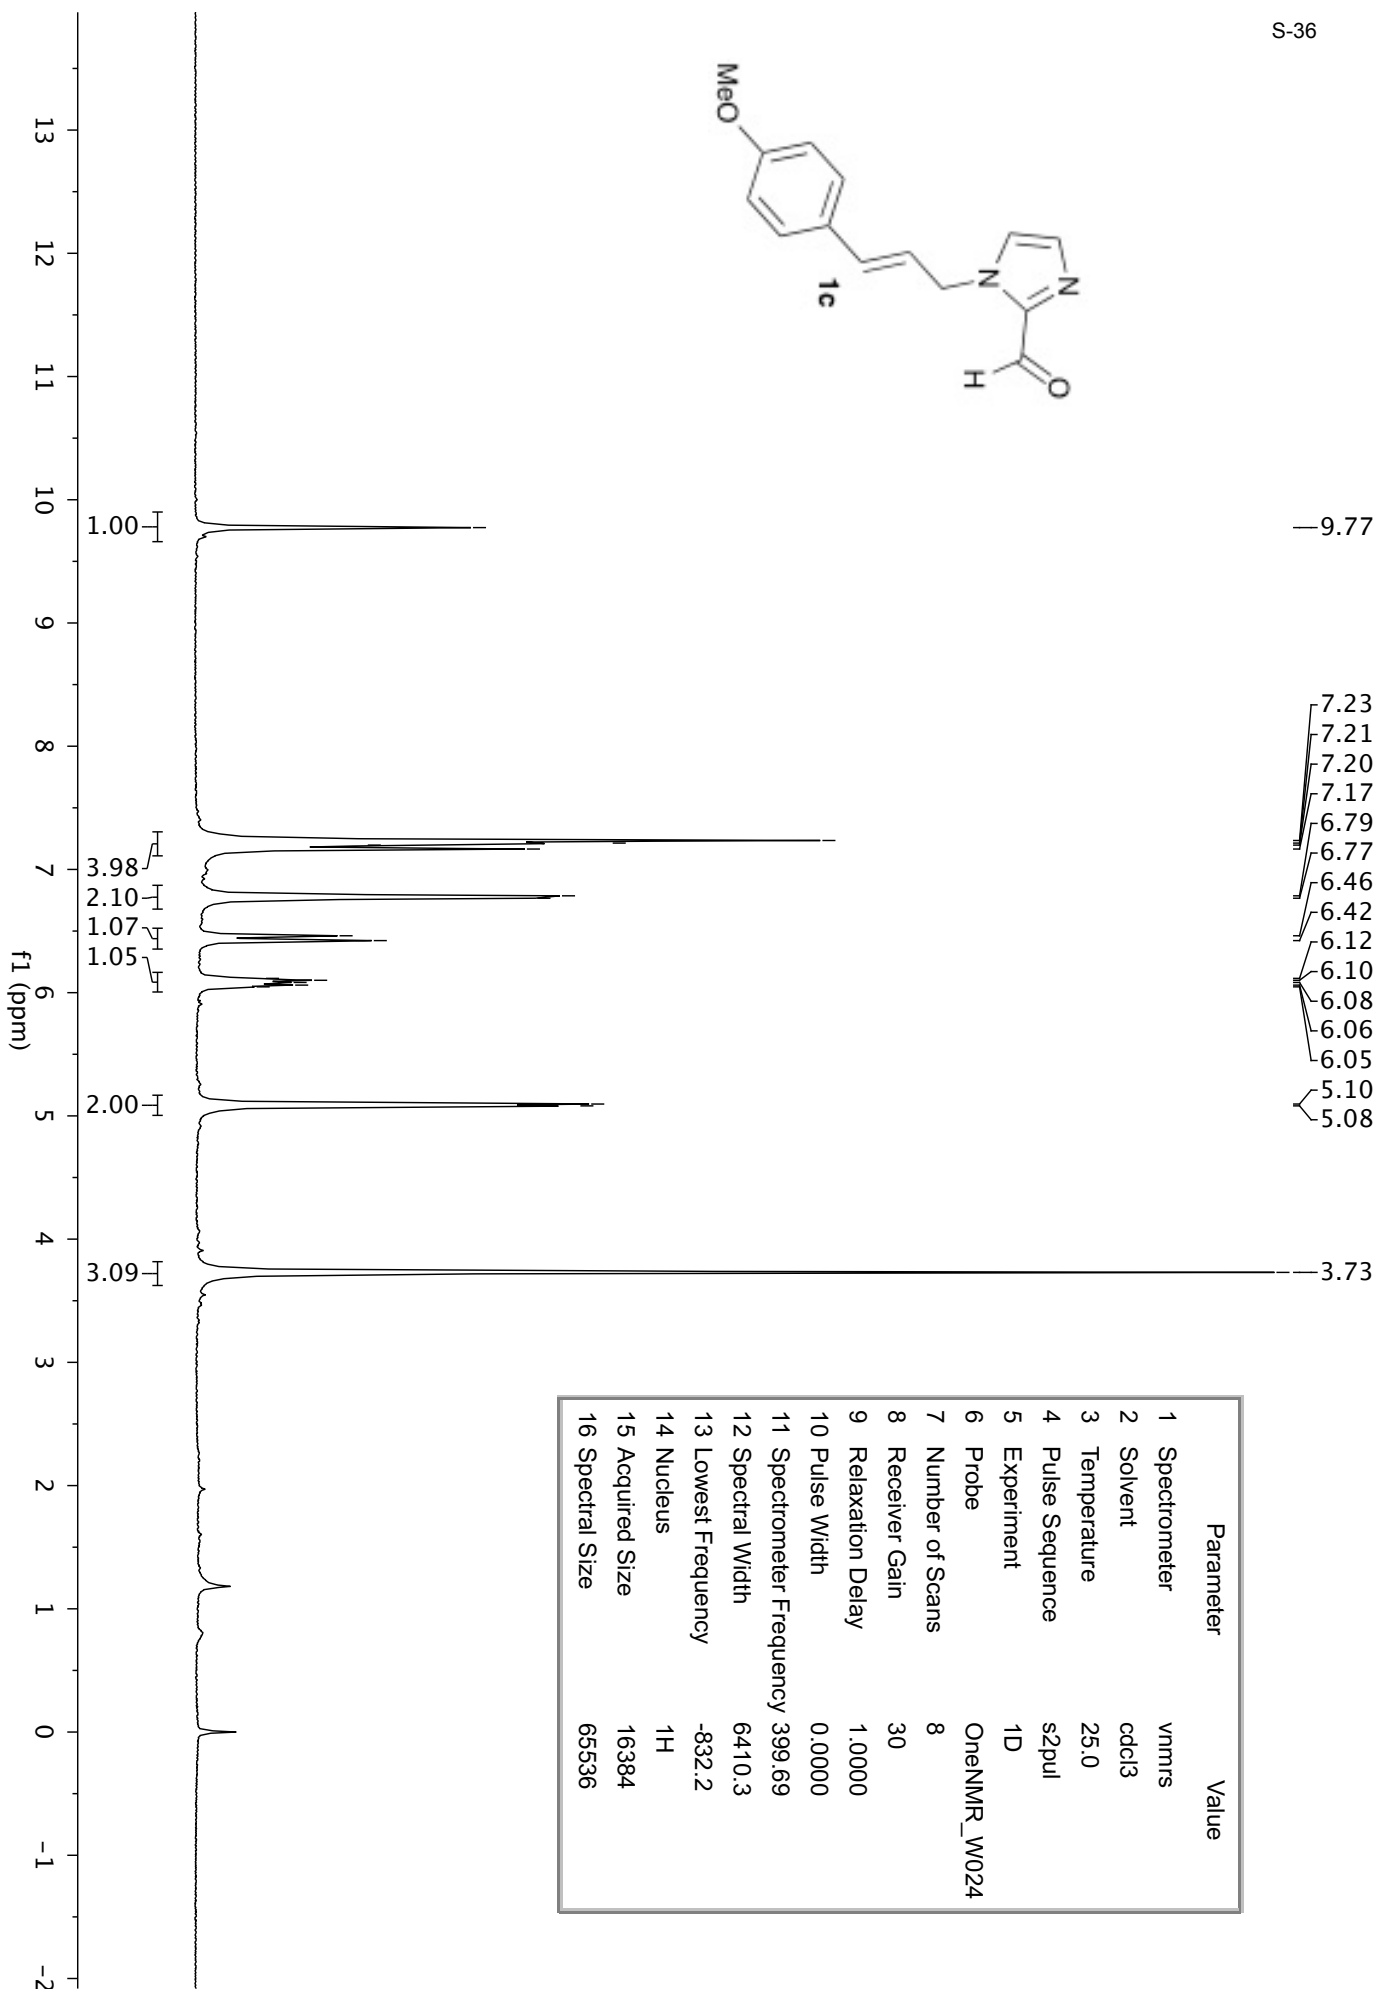

| Parameter                 | Value           |
|---------------------------|-----------------|
| 1 Spectrometer            | nmrs            |
| 2 Solvent                 | cdcl3           |
| 3 Temperature             | 25.0            |
| 4 Pulse Sequence          | s2pul           |
| 5 Experiment              | 1D              |
| 6 Probe                   | OneNMN_W0       |
| 7 Number of Scans         | 256             |
| 8 Receiver Gain           | 30              |
| 9 Relaxation Delay        | 1.0000          |
| 10 Pulse Width            | 0.0000          |
| 11 Spectrometer Frequency | 100.51          |
| 12 Spectral Width         | 25510.2         |
| 13 Lowest Frequency       | -1686.0         |
| 14 Nucleus                | <sup>13</sup> C |
| 15 Acquired Size          | 32768           |
| 16 Spectral Size          | 65536           |

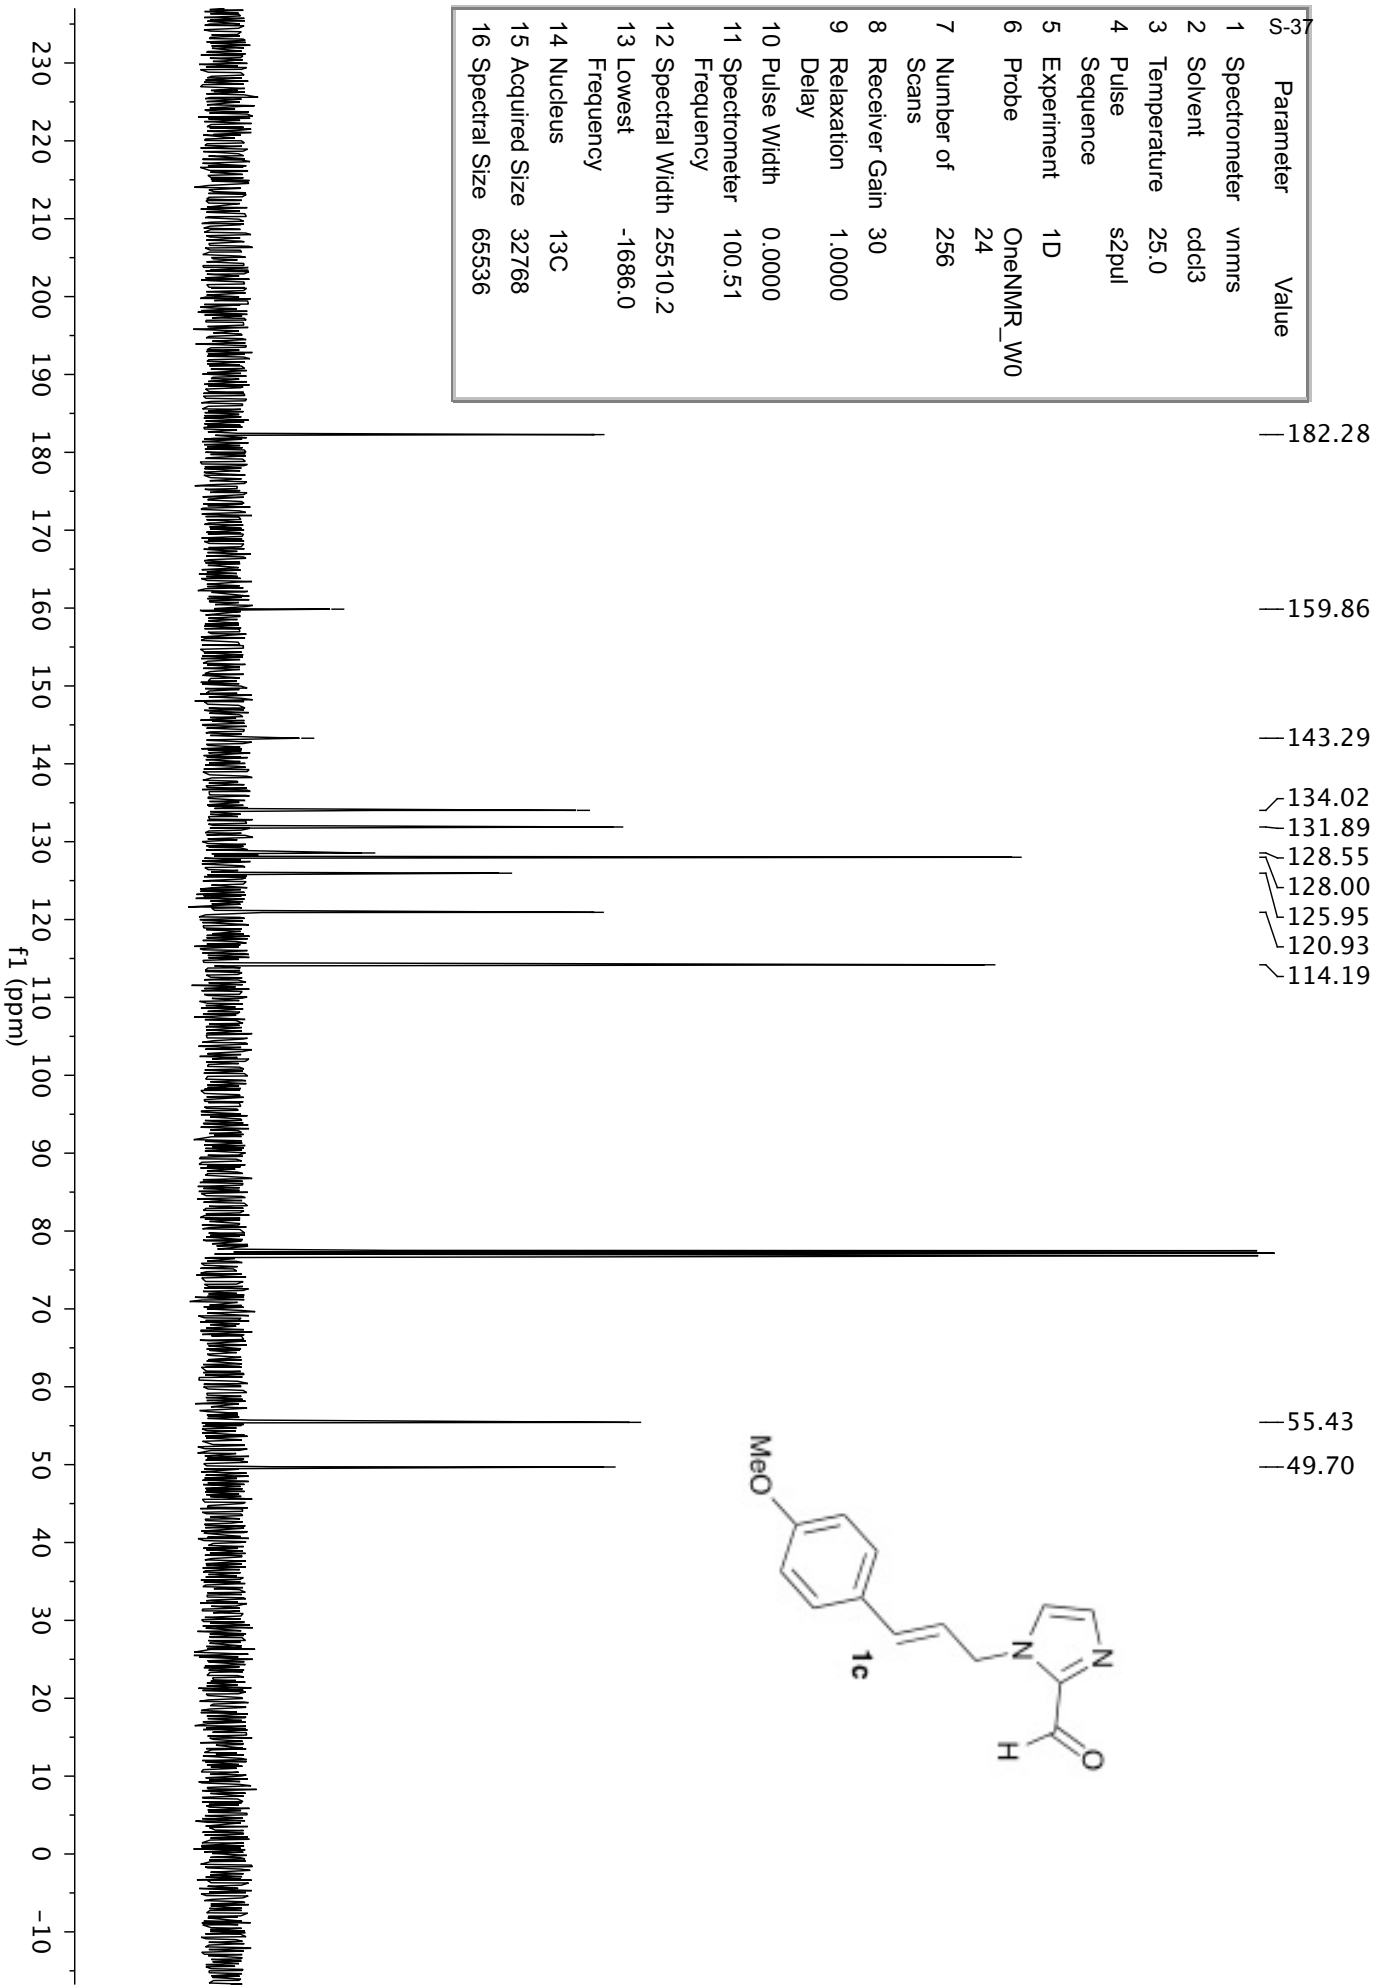

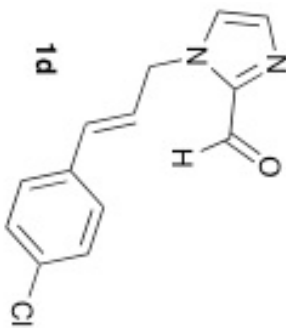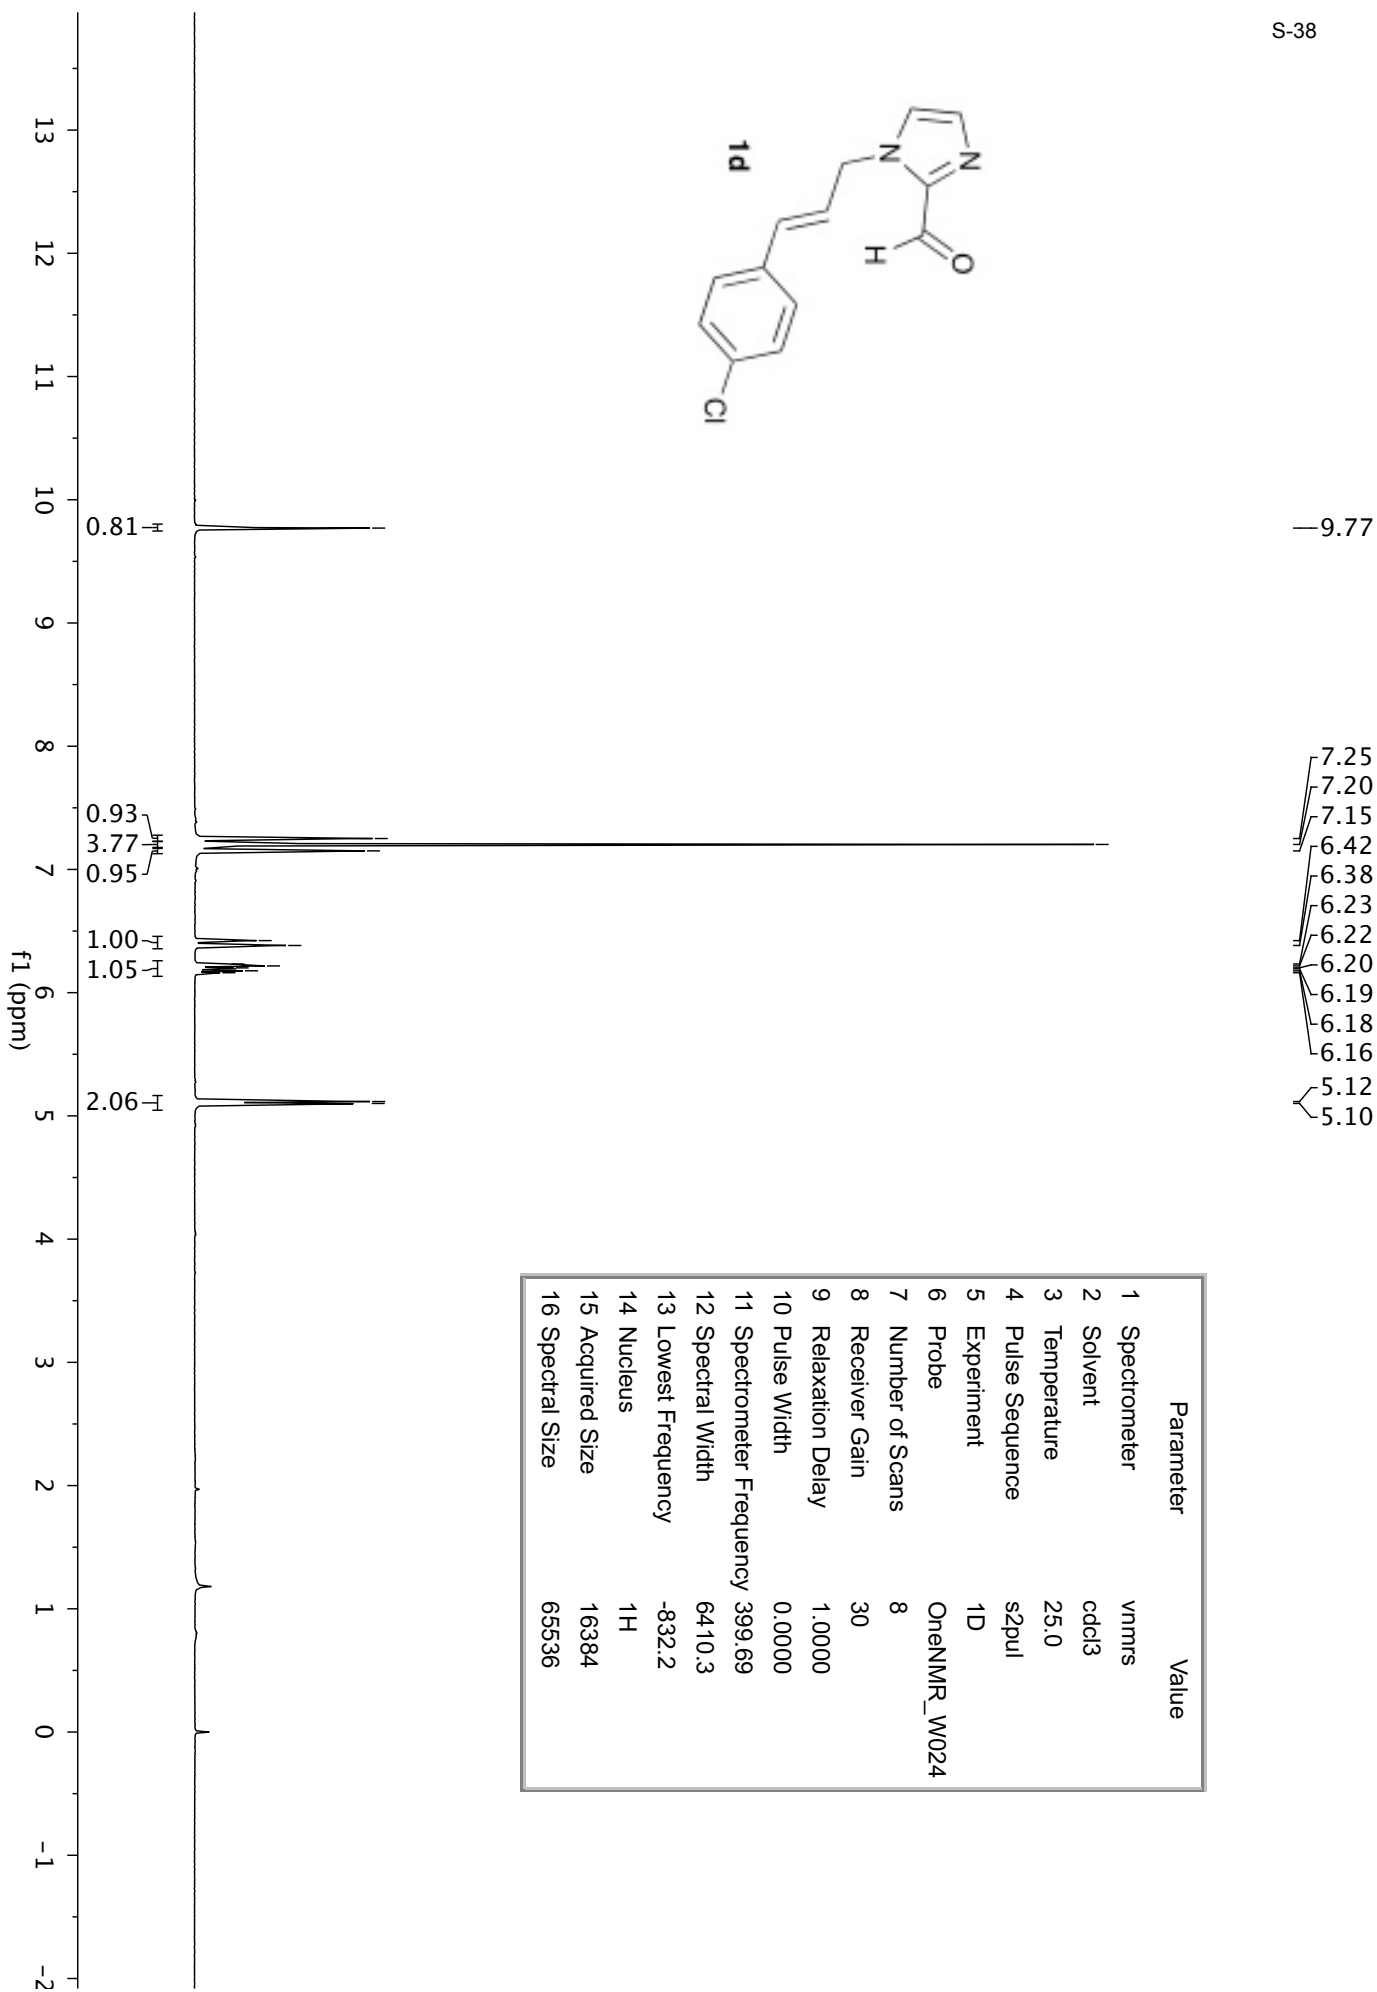

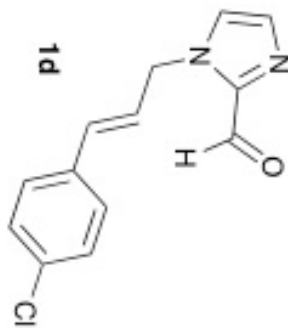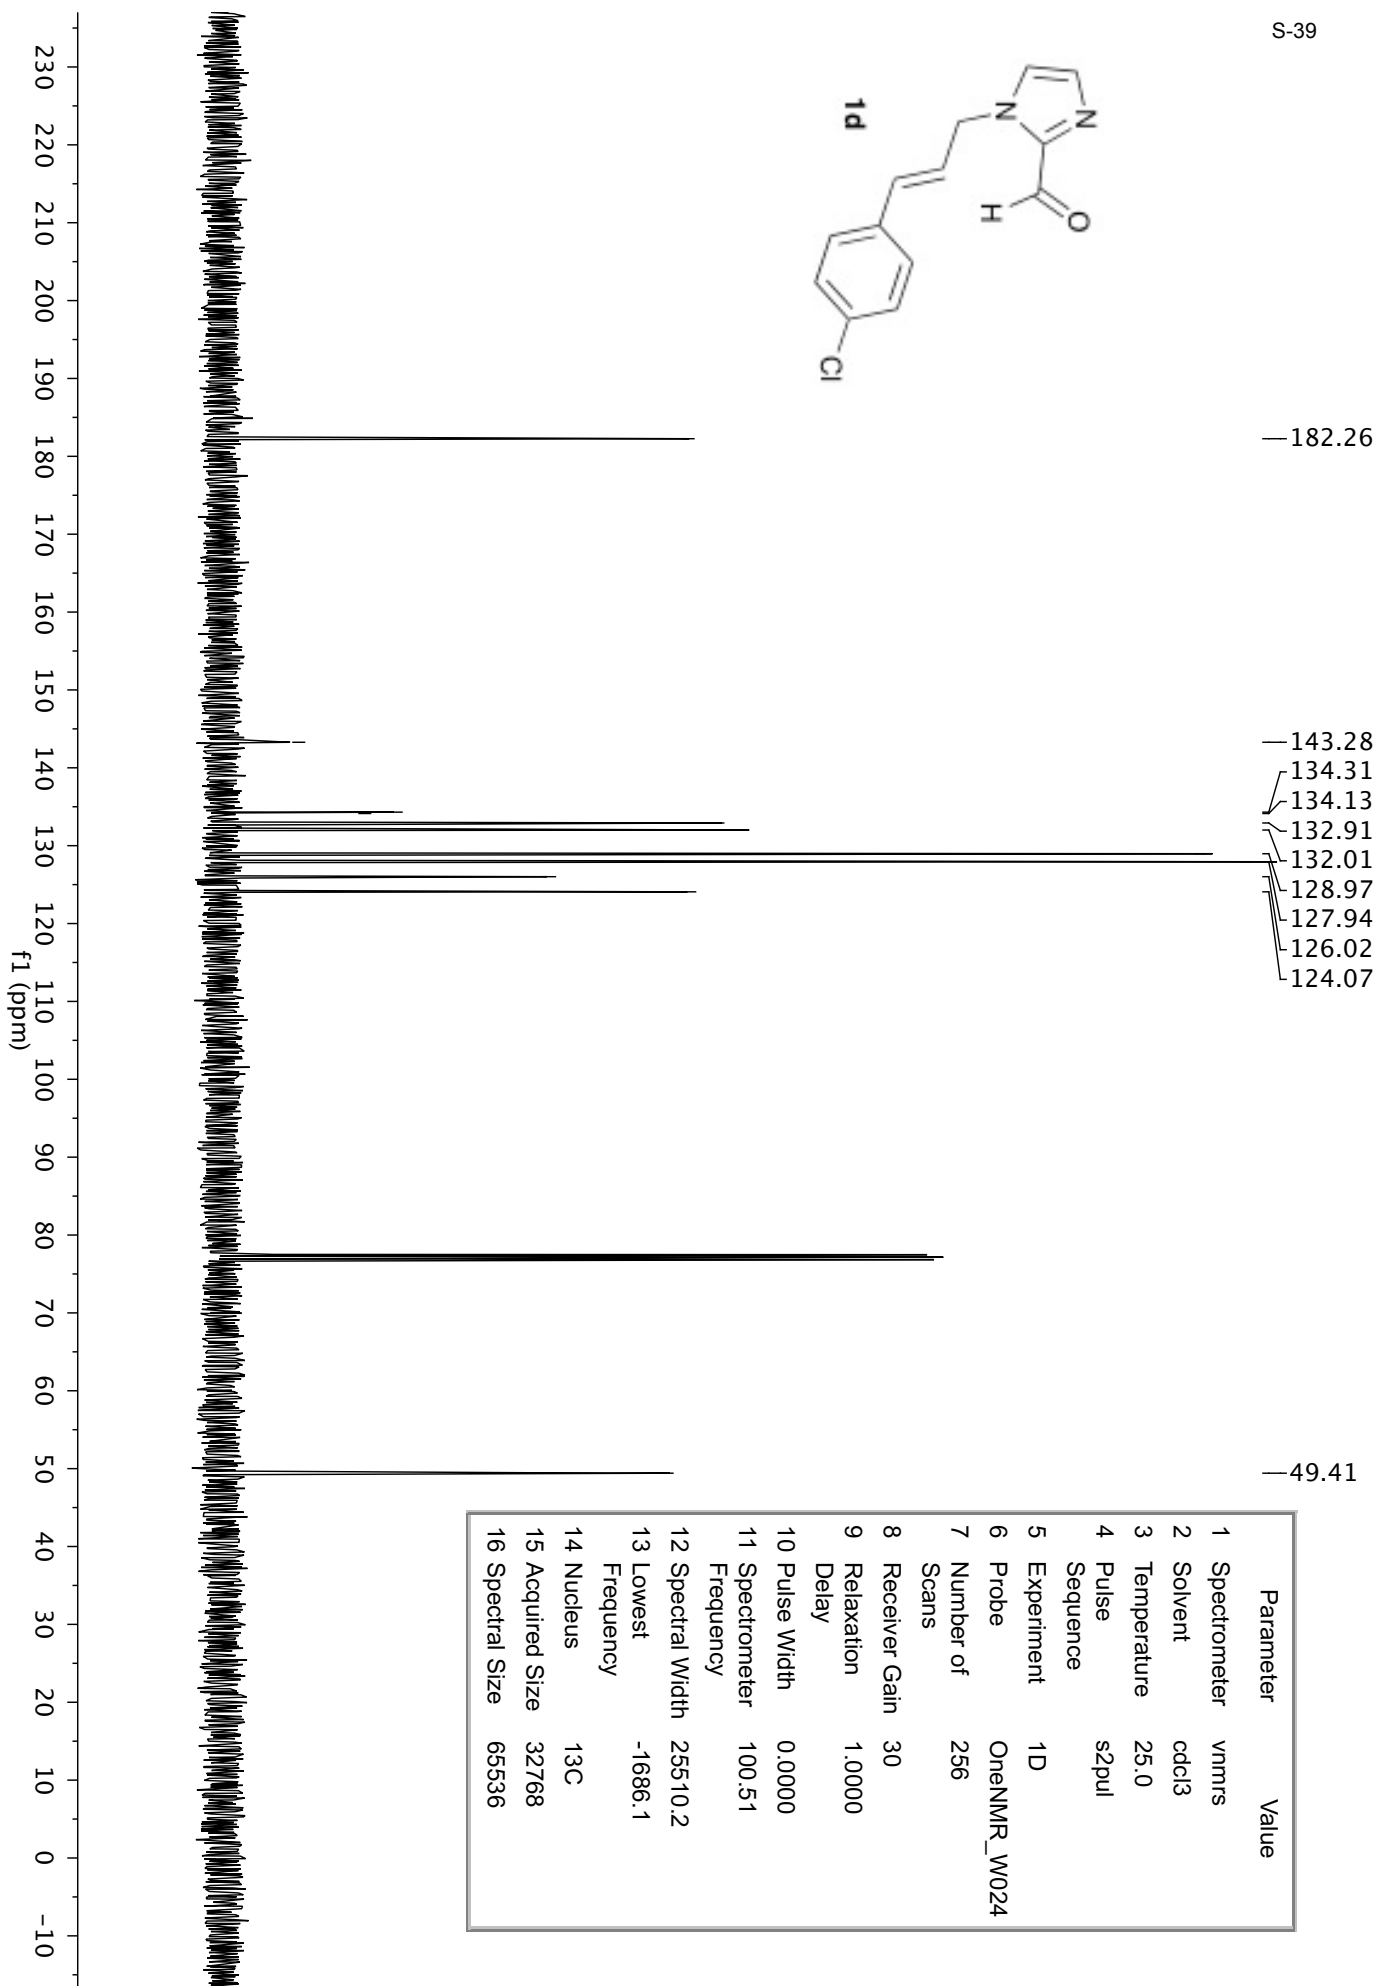

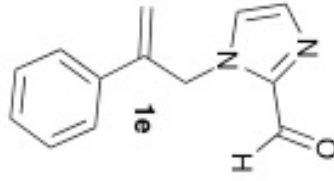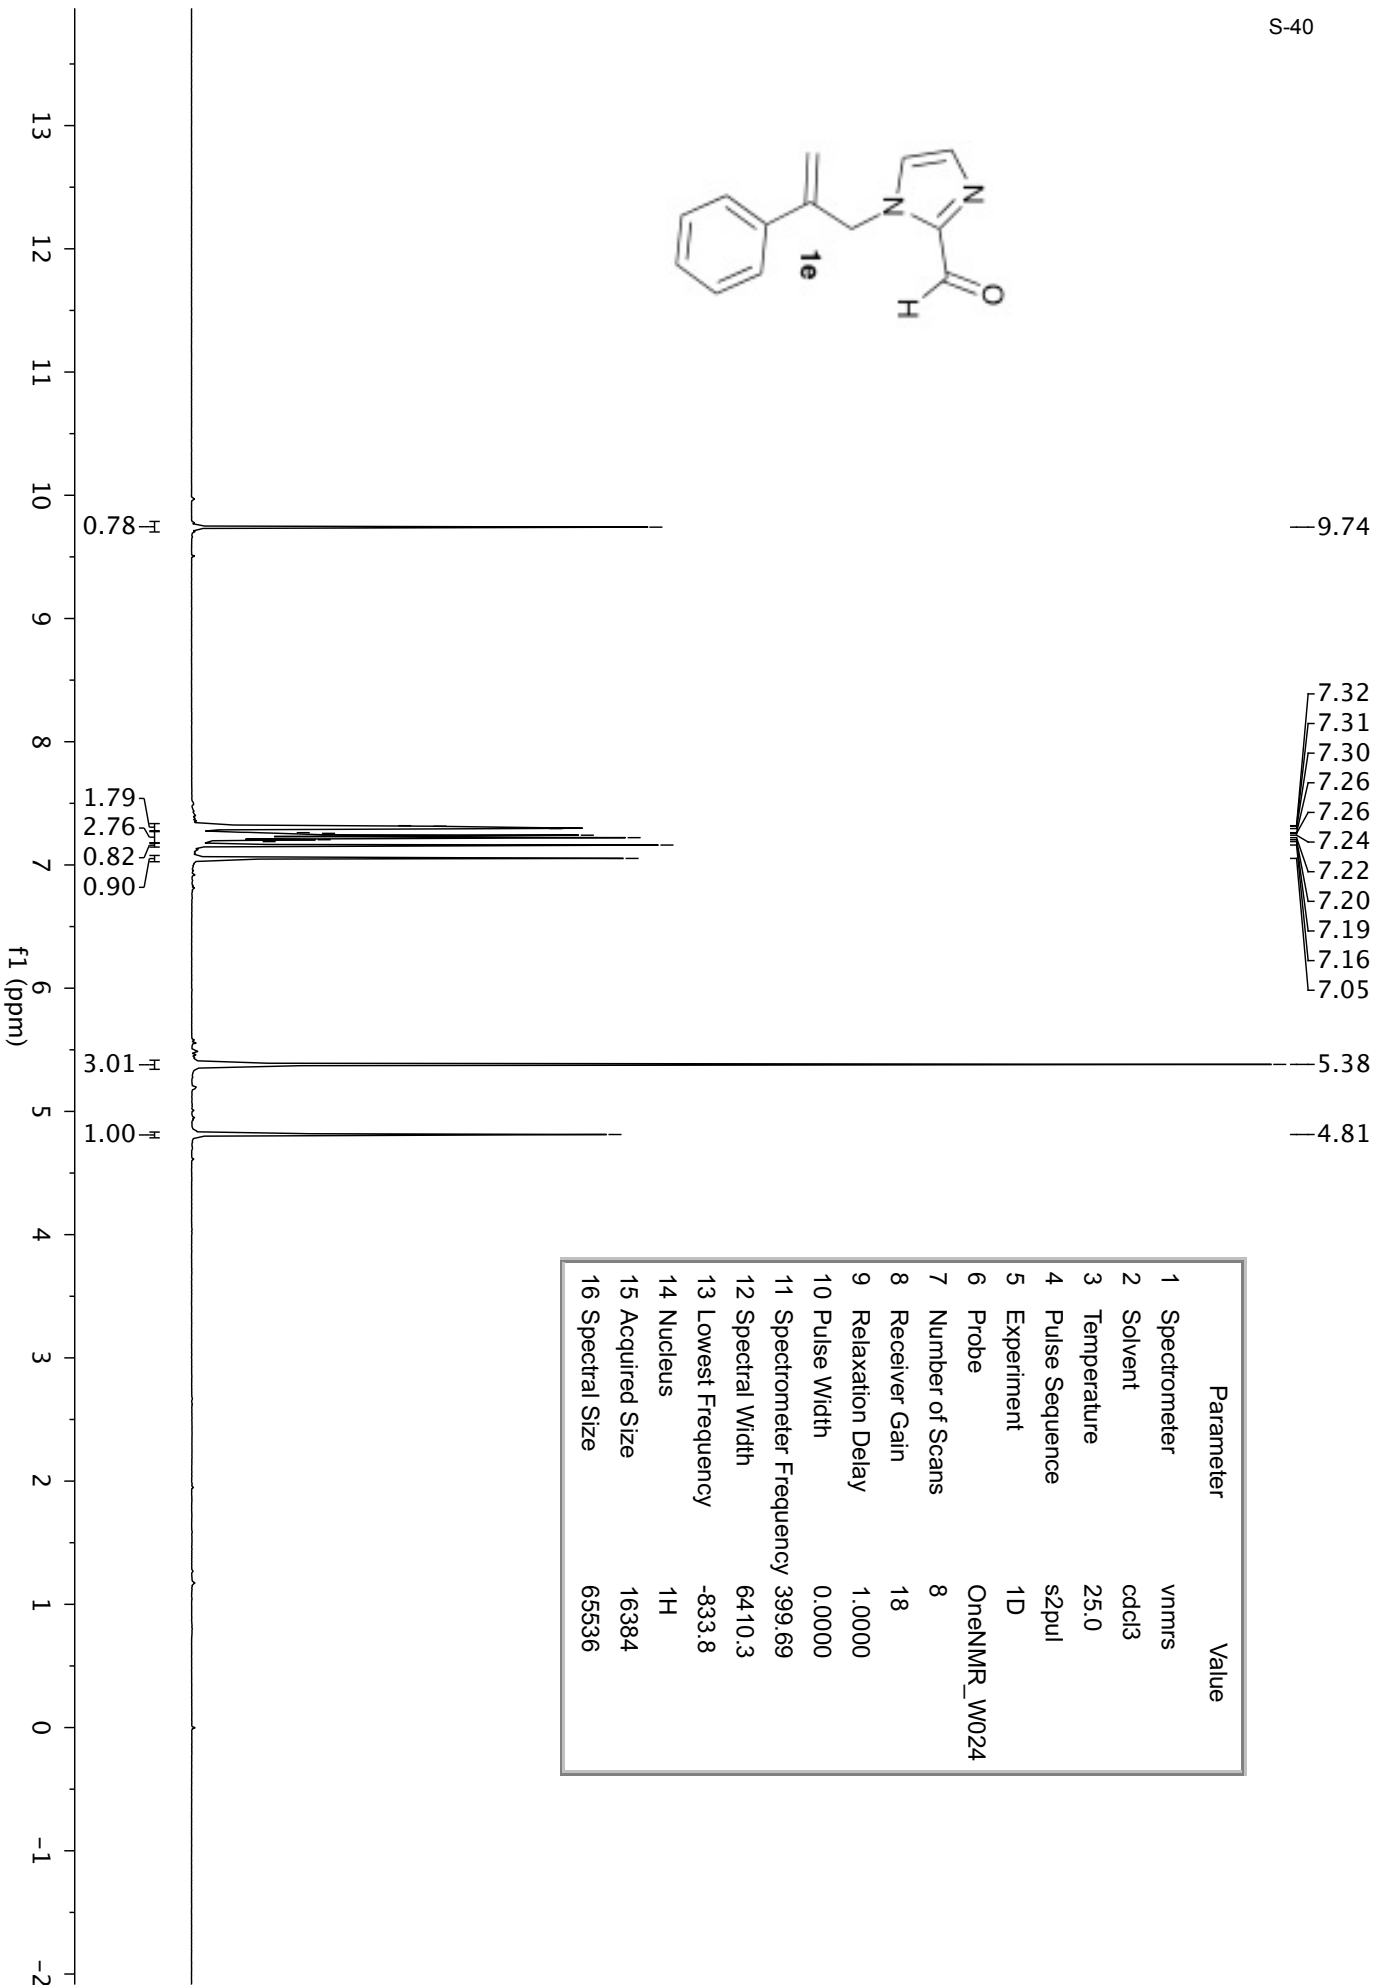



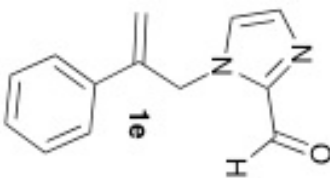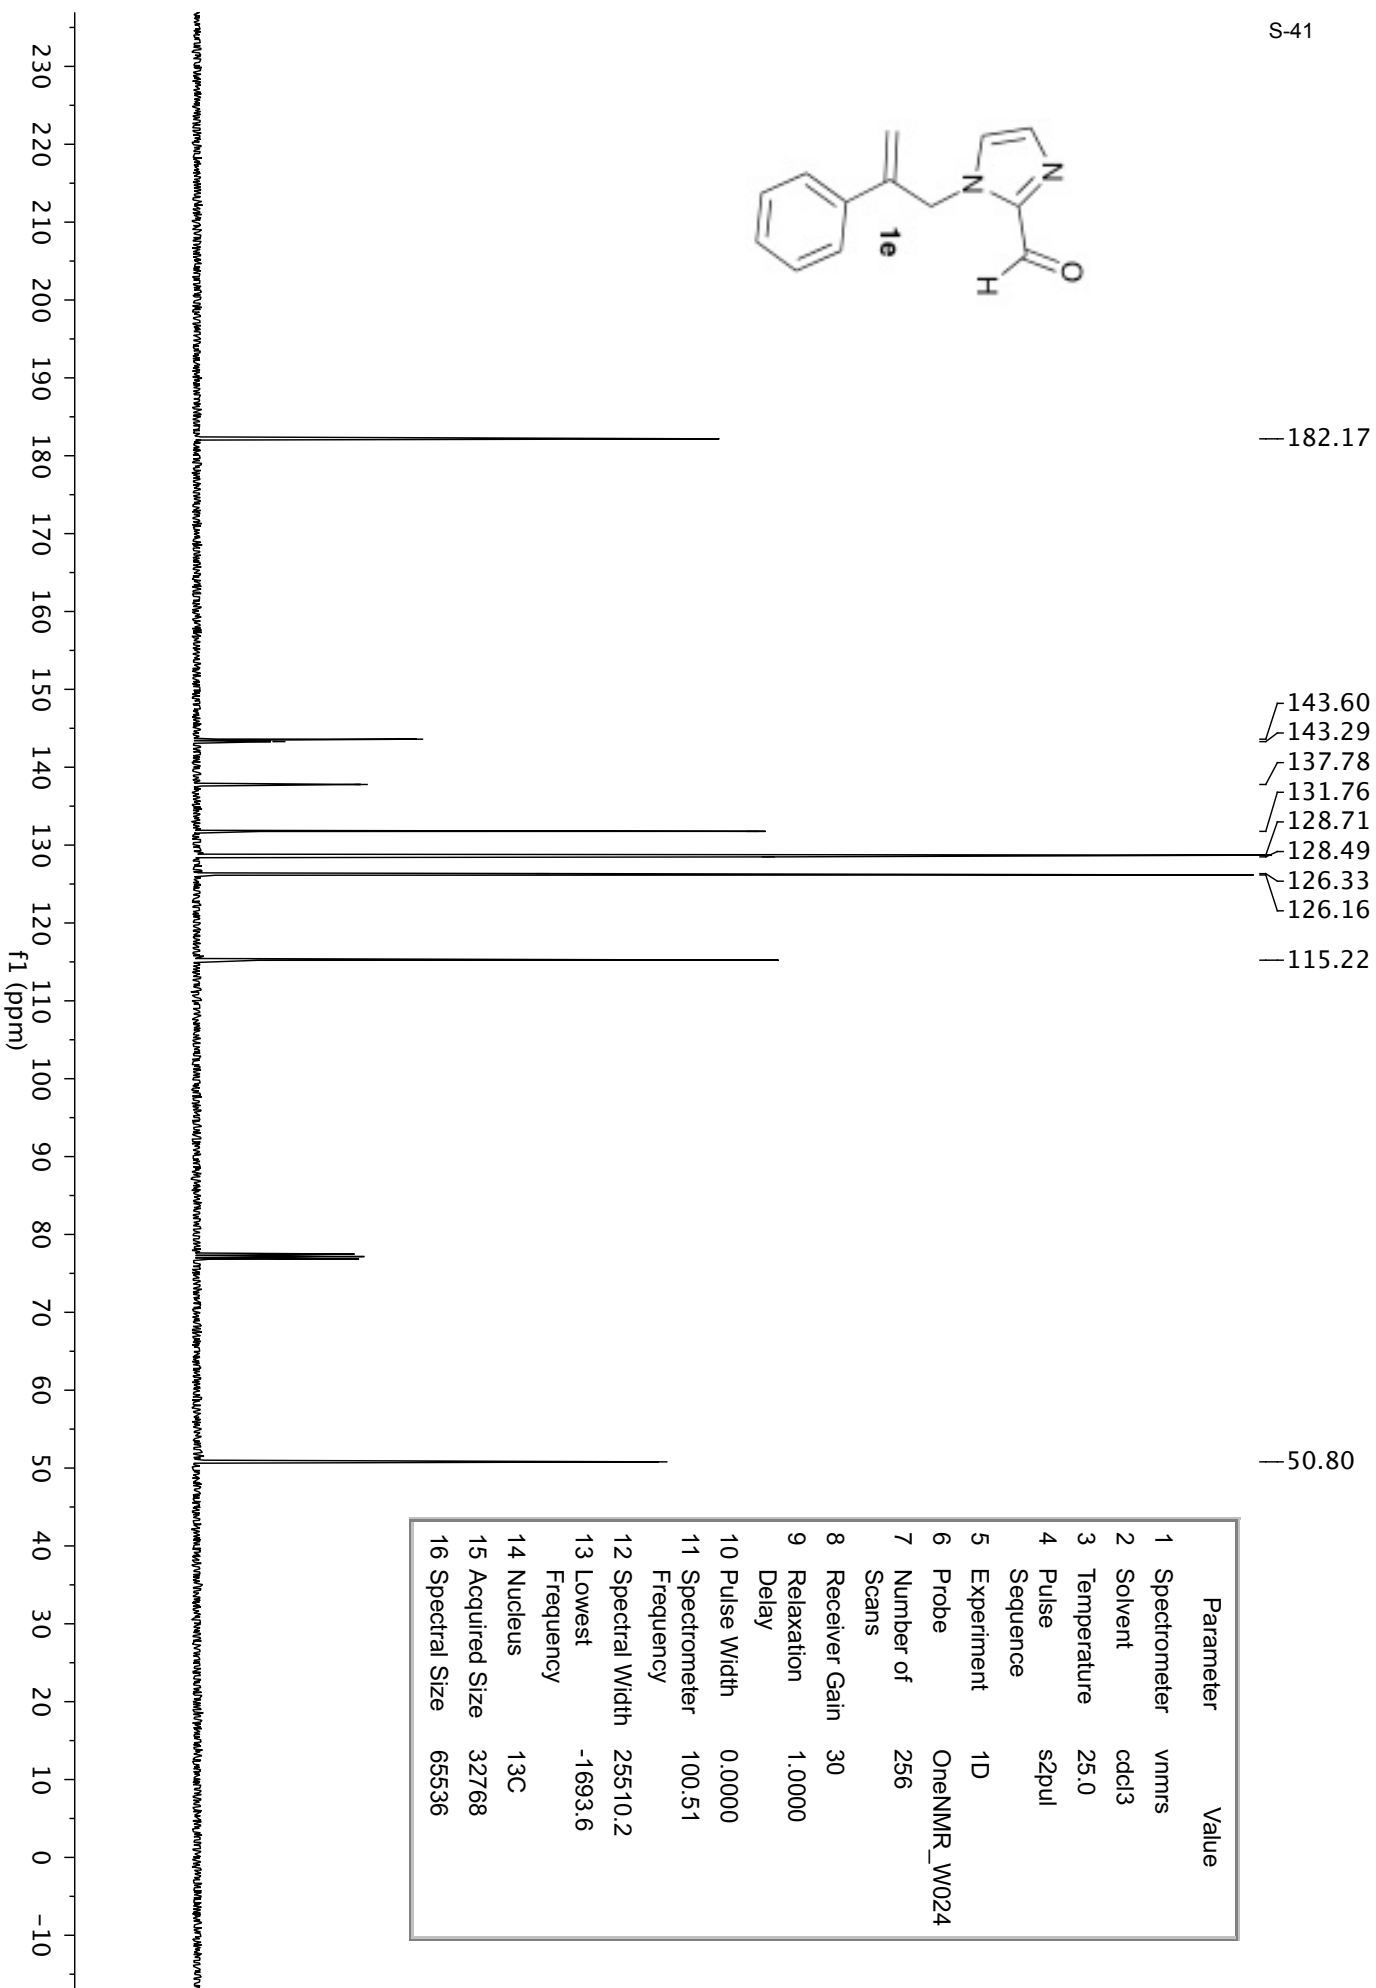

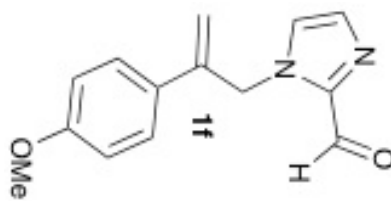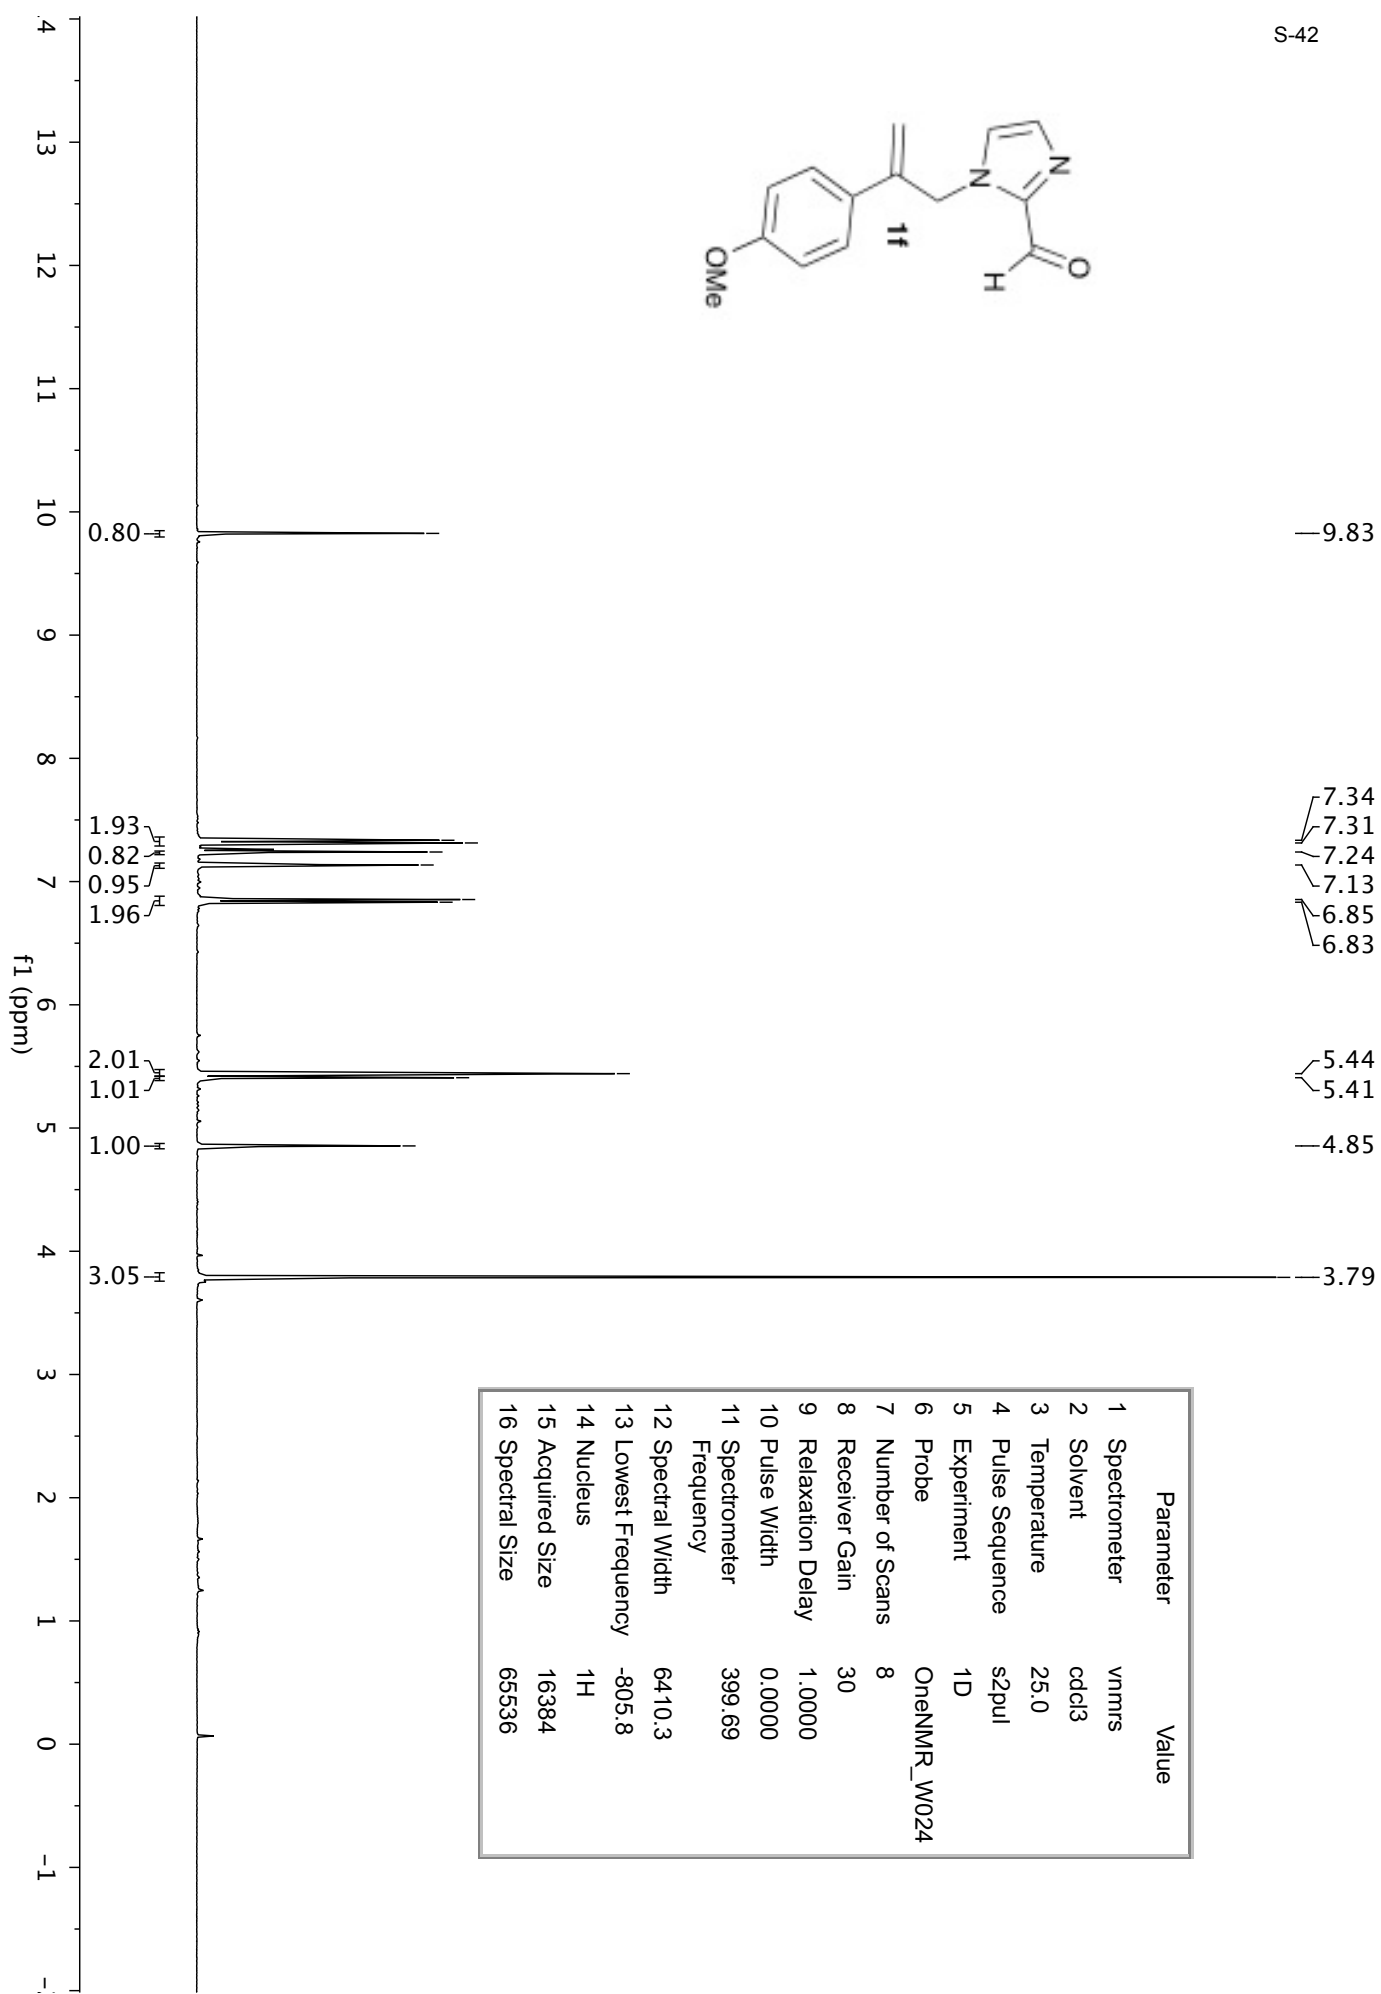

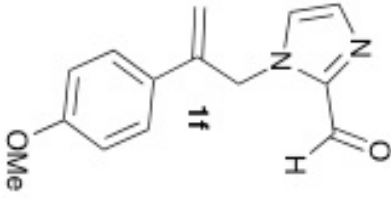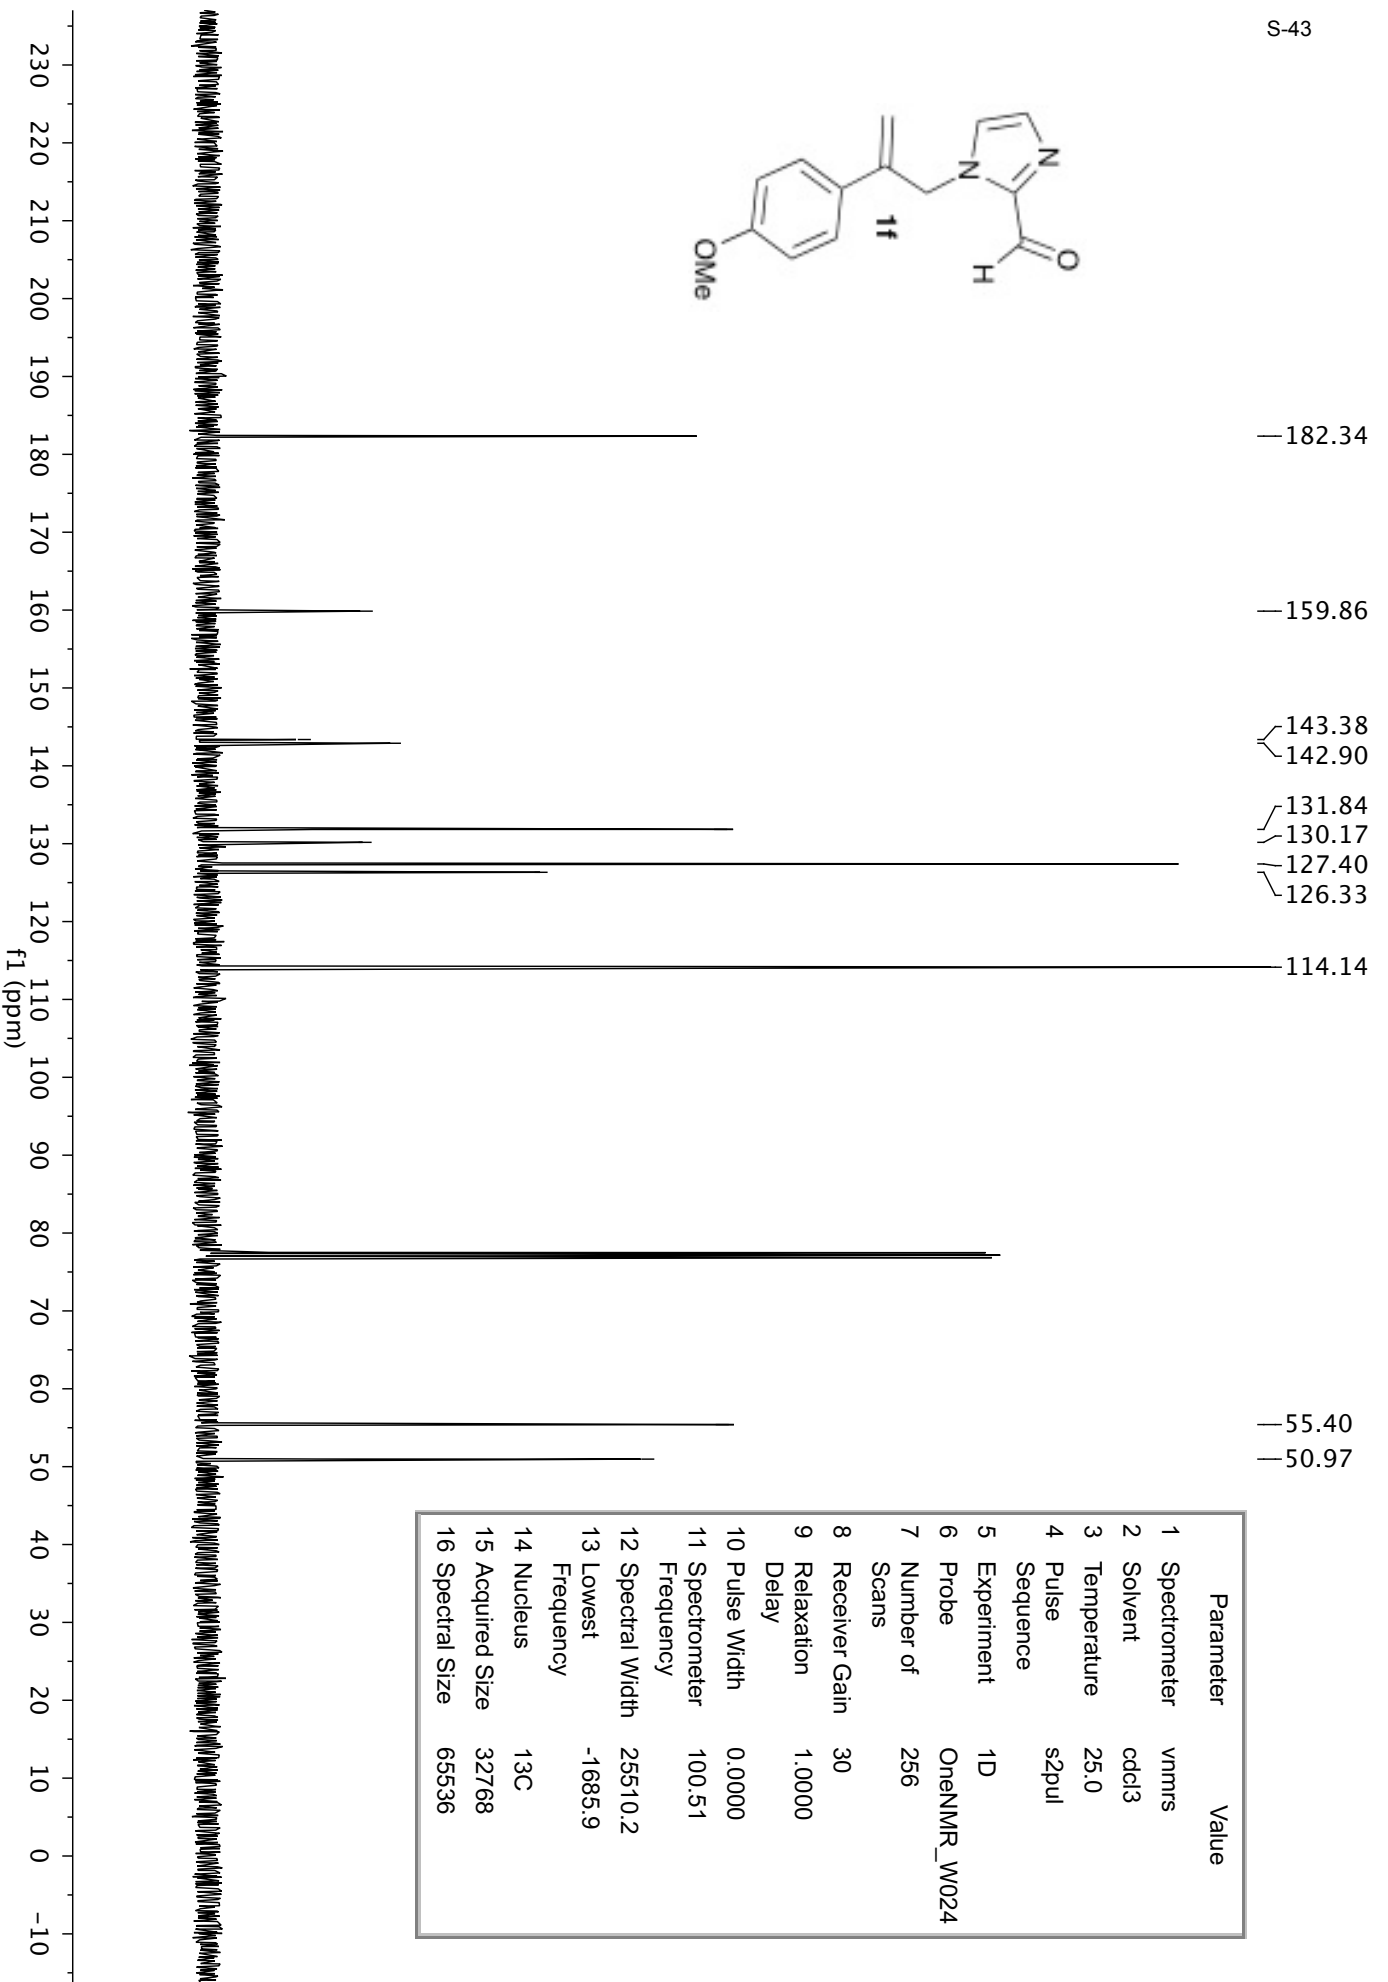

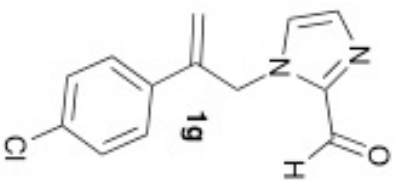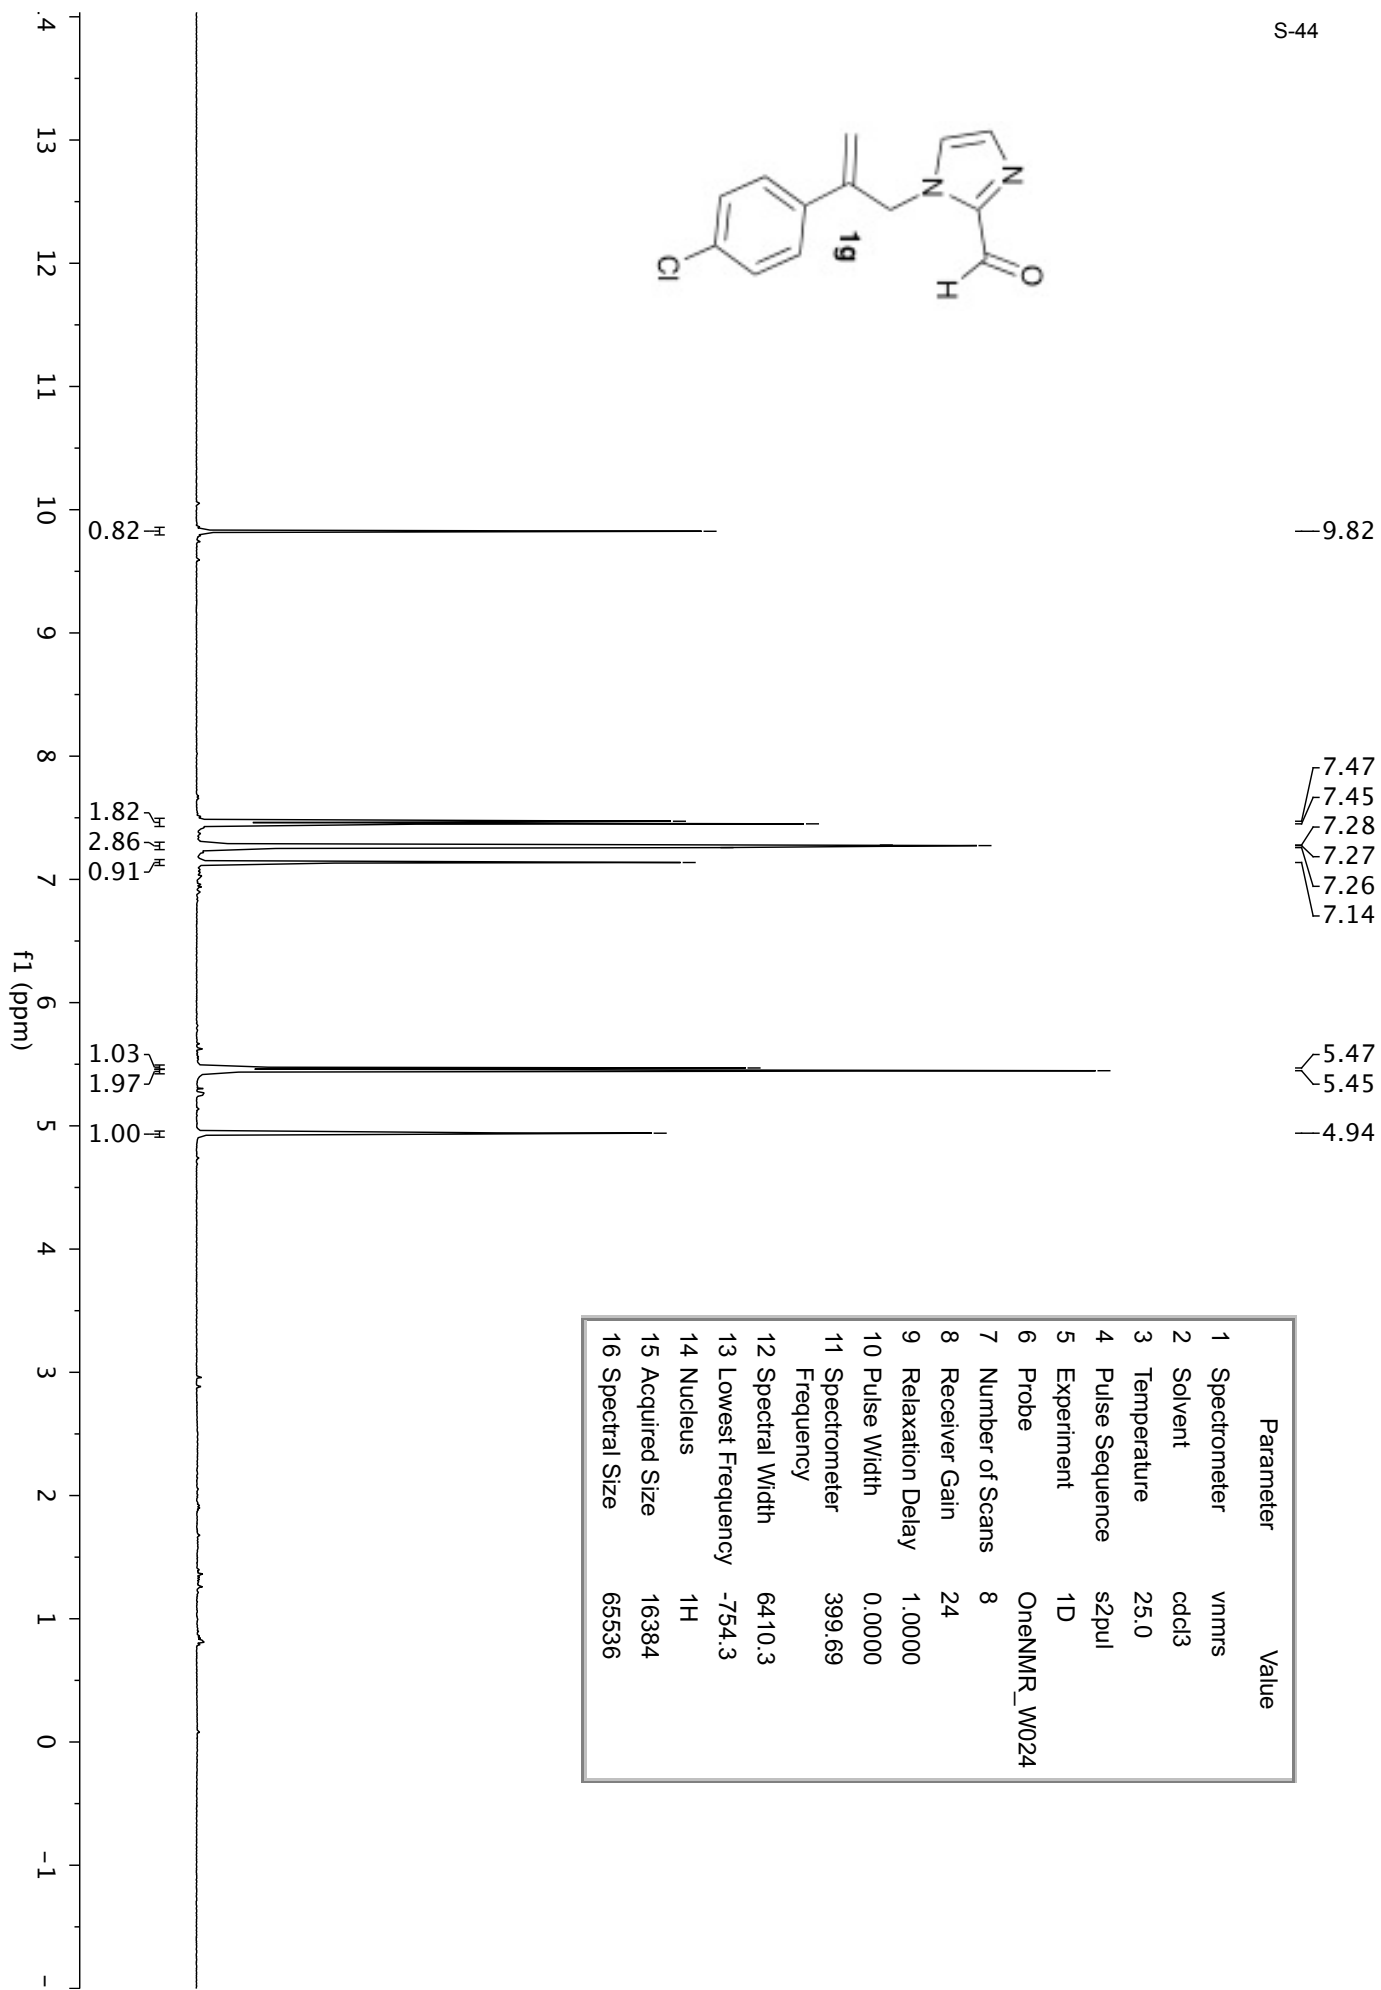

| Parameter                 | Value          |
|---------------------------|----------------|
| 1 Spectrometer            | vnmr5          |
| 2 Solvent                 | cdcl3          |
| 3 Temperature             | 25.0           |
| 4 Pulse Sequence          | szpul          |
| 5 Experiment              | 1D             |
| 6 Probe                   | OneNMR_W024    |
| 7 Number of Scans         | 8              |
| 8 Receiver Gain           | 24             |
| 9 Relaxation Delay        | 1.0000         |
| 10 Pulse Width            | 0.0000         |
| 11 Spectrometer Frequency | 399.69         |
| 12 Spectral Width         | 6410.3         |
| 13 Lowest Frequency       | -754.3         |
| 14 Nucleus                | <sup>1</sup> H |
| 15 Acquired Size          | 16384          |
| 16 Spectral Size          | 65536          |

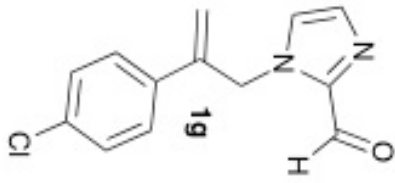

—182.34

143.29  
 142.81  
 136.76  
 131.99  
 131.94  
 127.91  
 126.28  
 122.68  
 115.89

—50.67

| Parameter                 | Value           |
|---------------------------|-----------------|
| 1 Spectrometer            | nmr5            |
| 2 Solvent                 | cdcl3           |
| 3 Temperature             | 25.0            |
| 4 Pulse Sequence          | szpul           |
| 5 Experiment              | 1D              |
| 6 Probe                   | OneNMR_W024     |
| 7 Number of Scans         | 256             |
| 8 Receiver Gain           | 30              |
| 9 Relaxation Delay        | 1.0000          |
| 10 Pulse Width            | 0.0000          |
| 11 Spectrometer Frequency | 100.51          |
| 12 Spectral Width         | 25510.2         |
| 13 Lowest Frequency       | -1686.6         |
| 14 Nucleus                | <sup>13</sup> C |
| 15 Acquired Size          | 32768           |
| 16 Spectral Size          | 65536           |

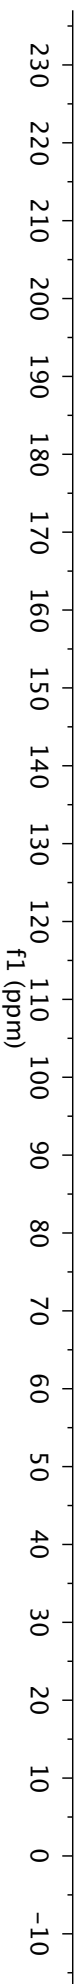

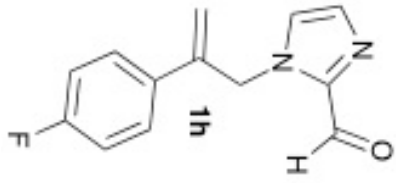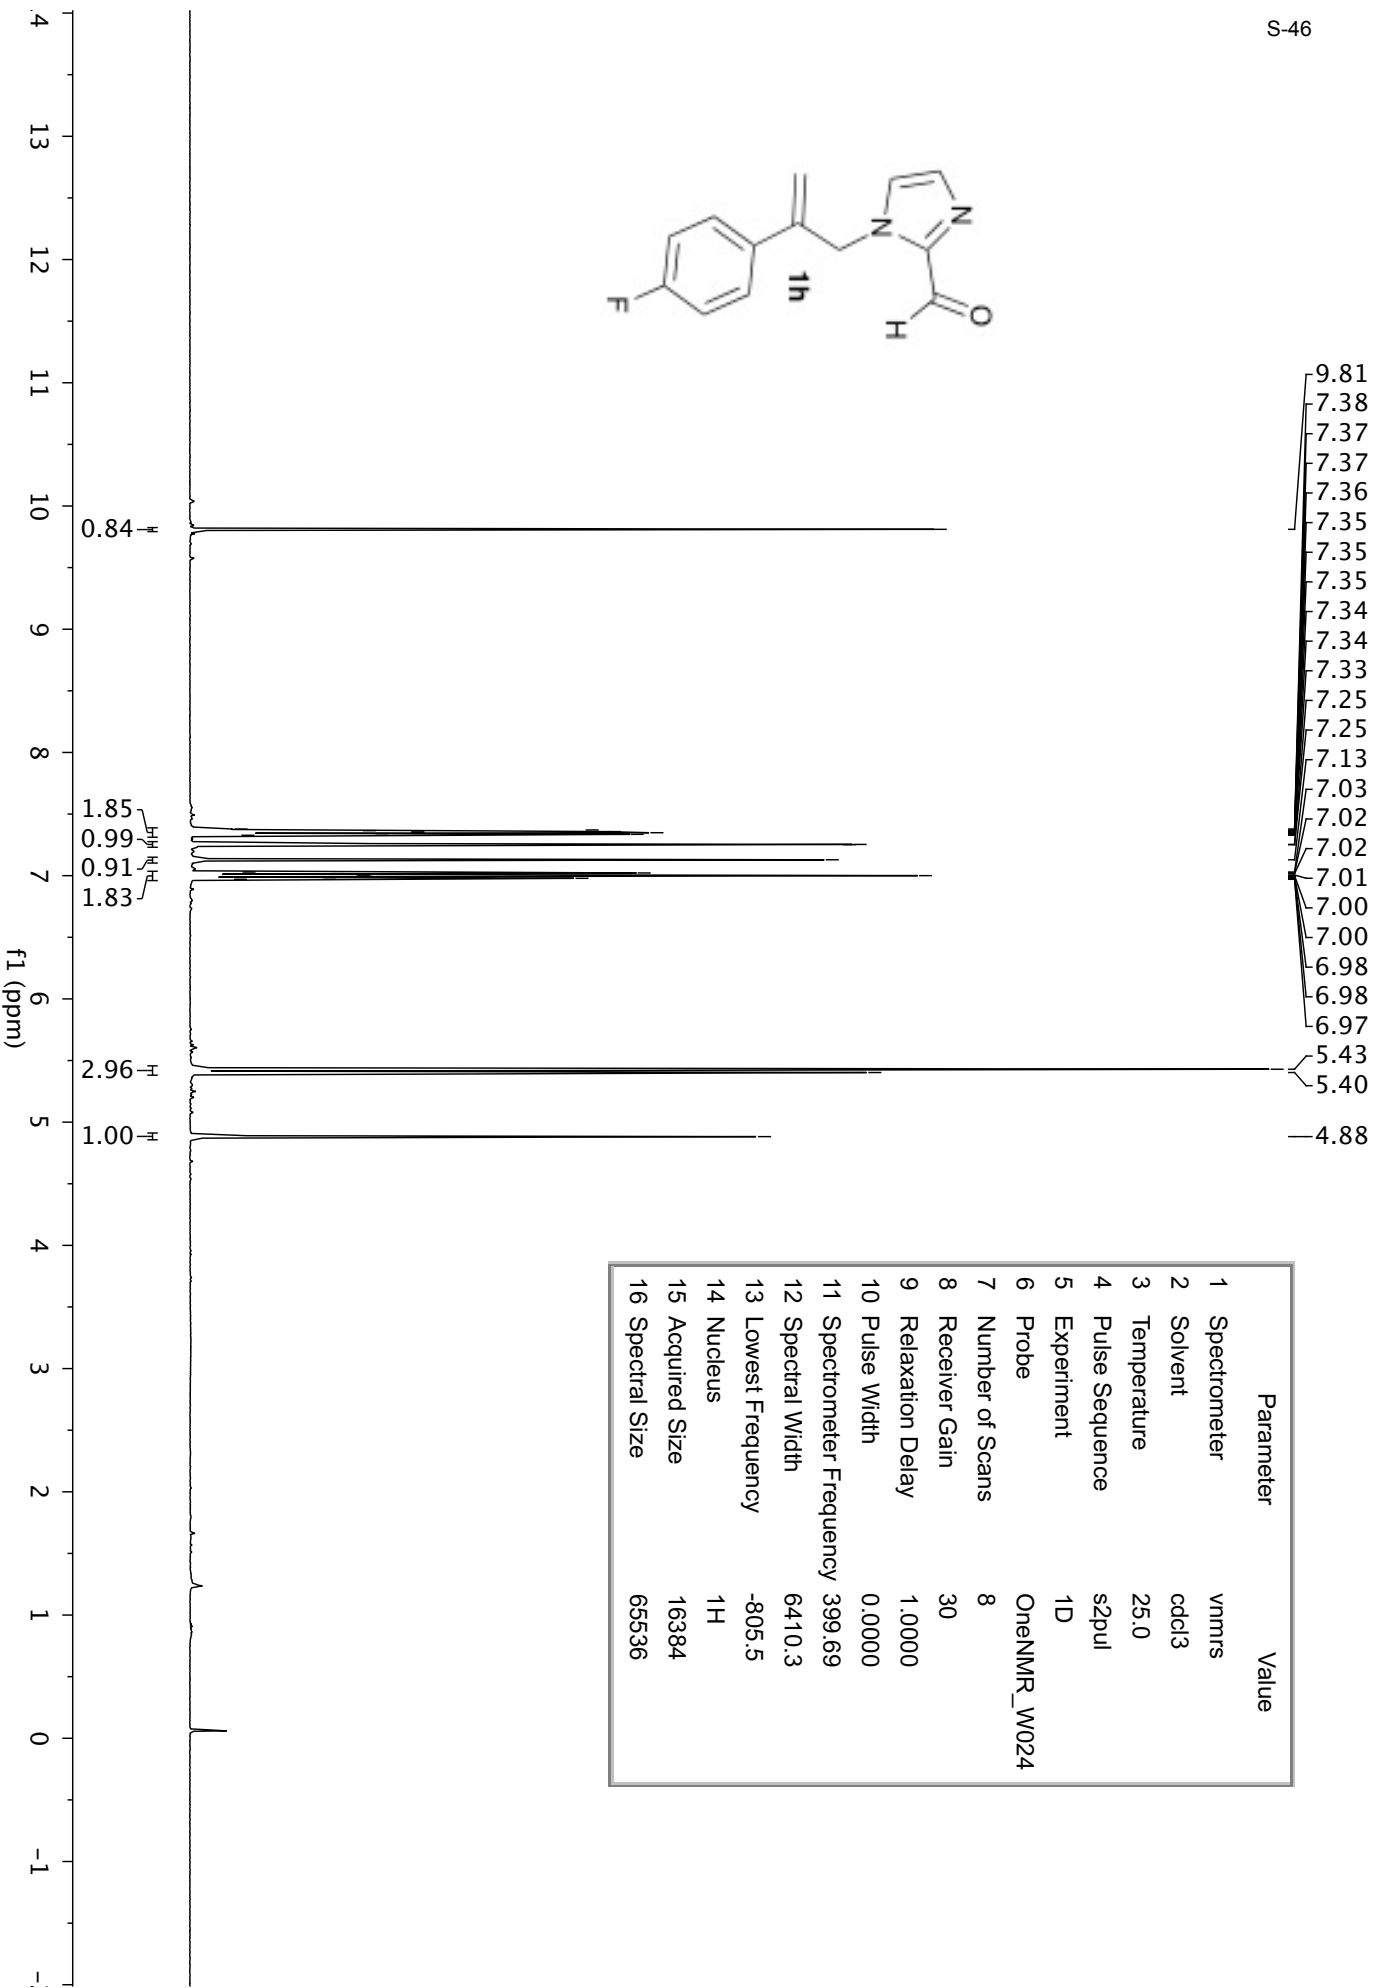

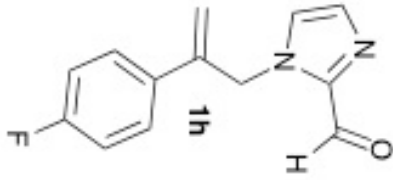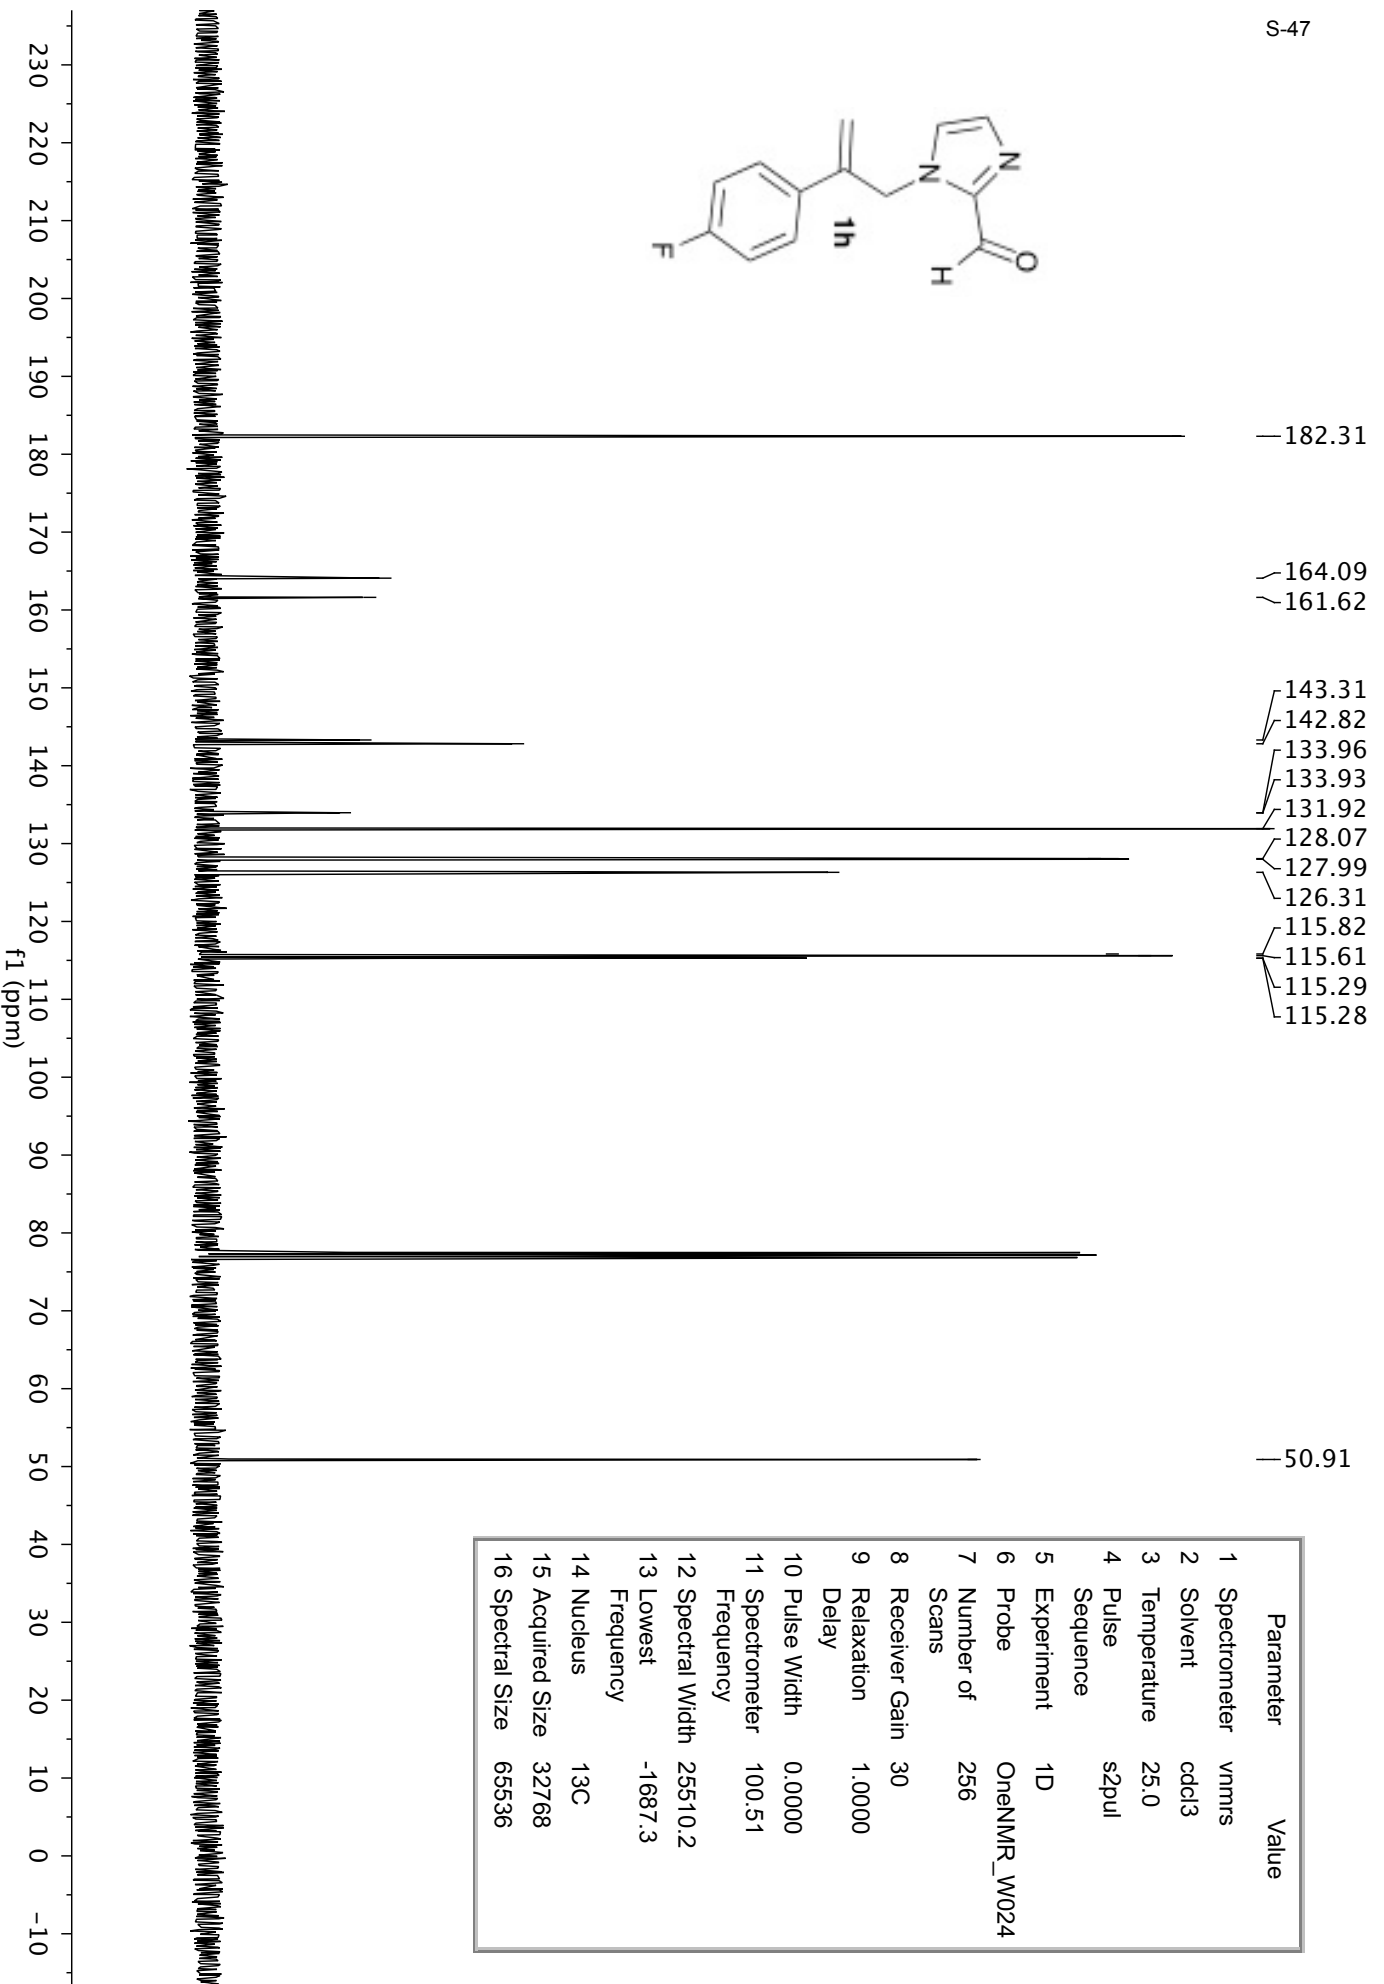

--113.48

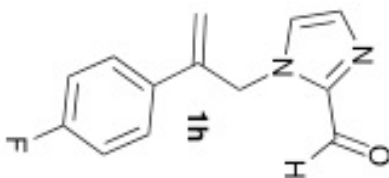

| Parameter                 | Value        |
|---------------------------|--------------|
| 1 Spectrometer            | vmrns        |
| 2 Solvent                 | cdcl3        |
| 3 Temperature             | 25.0         |
| 4 Pulse Sequence          | s2pul        |
| 5 Experiment              | 1D           |
| 6 Probe                   | OneNMRR_W024 |
| 7 Number of Scans         | 16           |
| 8 Receiver Gain           | 54           |
| 9 Relaxation Delay        | 1.0000       |
| 10 Pulse Width            | 0.0000       |
| 11 Spectrometer Frequency | 376.05       |
| 12 Spectral Width         | 89285.7      |
| 13 Lowest Frequency       | -76610.2     |
| 14 Nucleus                | 19F          |
| 15 Acquired Size          | 65536        |
| 16 Spectral Size          | 131072       |

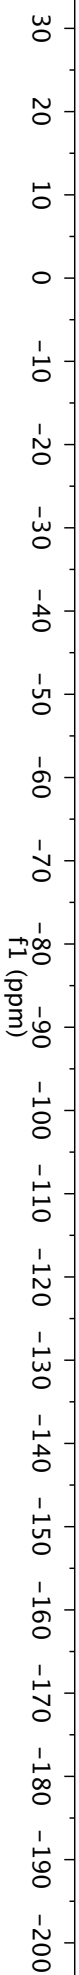



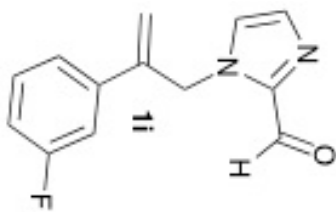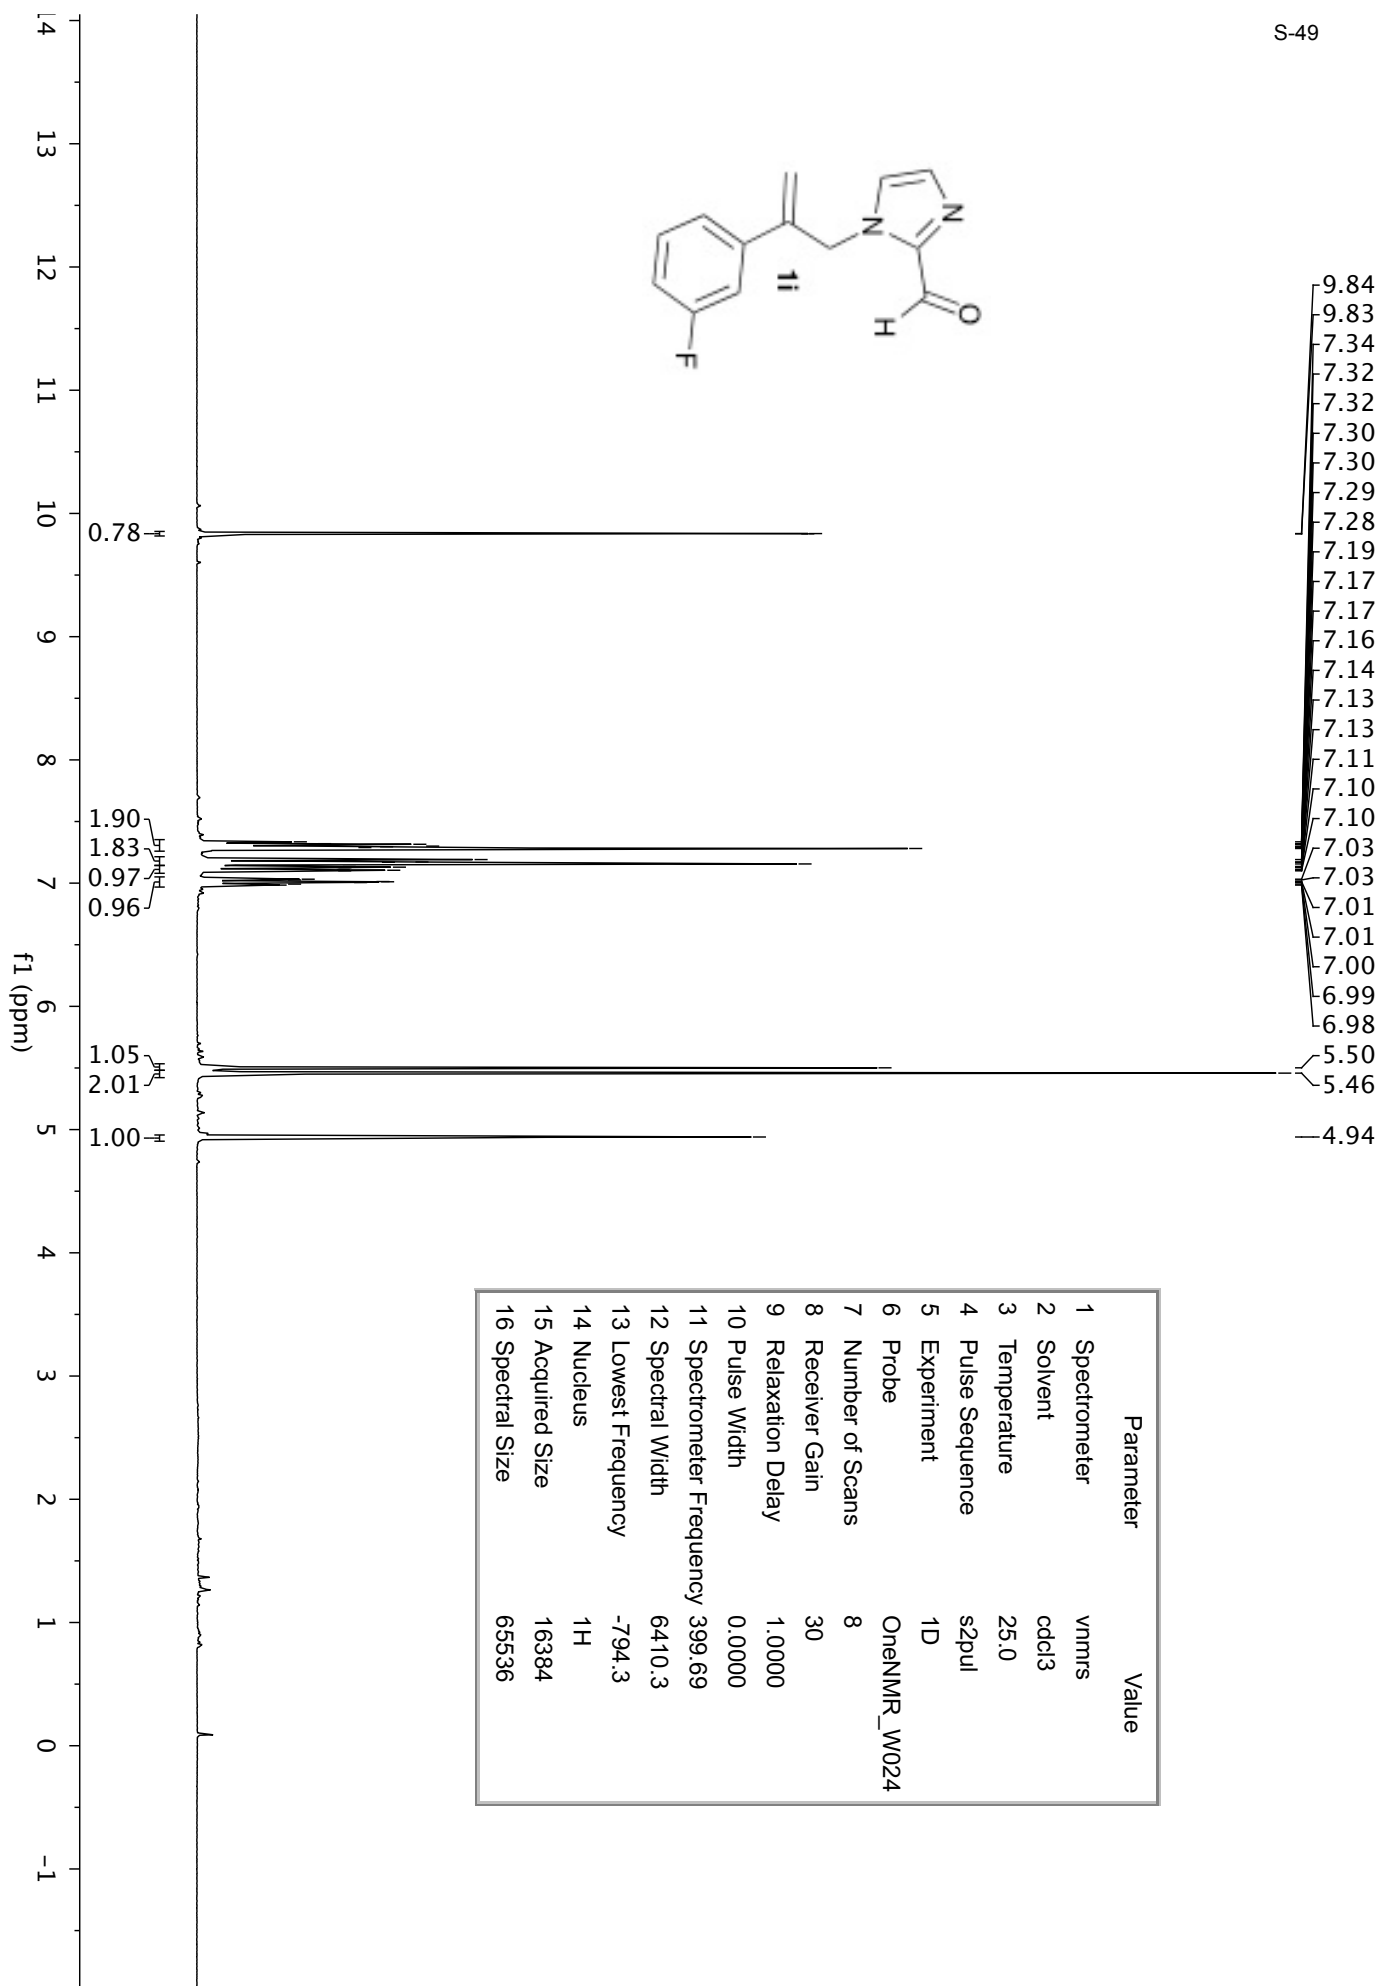

| Parameter                 | Value          |
|---------------------------|----------------|
| 1 Spectrometer            | nmr1           |
| 2 Solvent                 | cdcl3          |
| 3 Temperature             | 25.0           |
| 4 Pulse Sequence          | s2pul          |
| 5 Experiment              | 1D             |
| 6 Probe                   | OneNMW024      |
| 7 Number of Scans         | 8              |
| 8 Receiver Gain           | 30             |
| 9 Relaxation Delay        | 1.0000         |
| 10 Pulse Width            | 0.0000         |
| 11 Spectrometer Frequency | 399.69         |
| 12 Spectral Width         | 6410.3         |
| 13 Lowest Frequency       | -794.3         |
| 14 Nucleus                | <sup>1</sup> H |
| 15 Acquired Size          | 16384          |
| 16 Spectral Size          | 65536          |

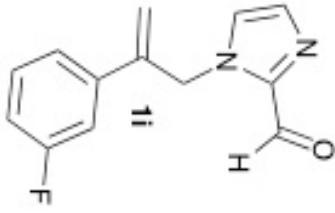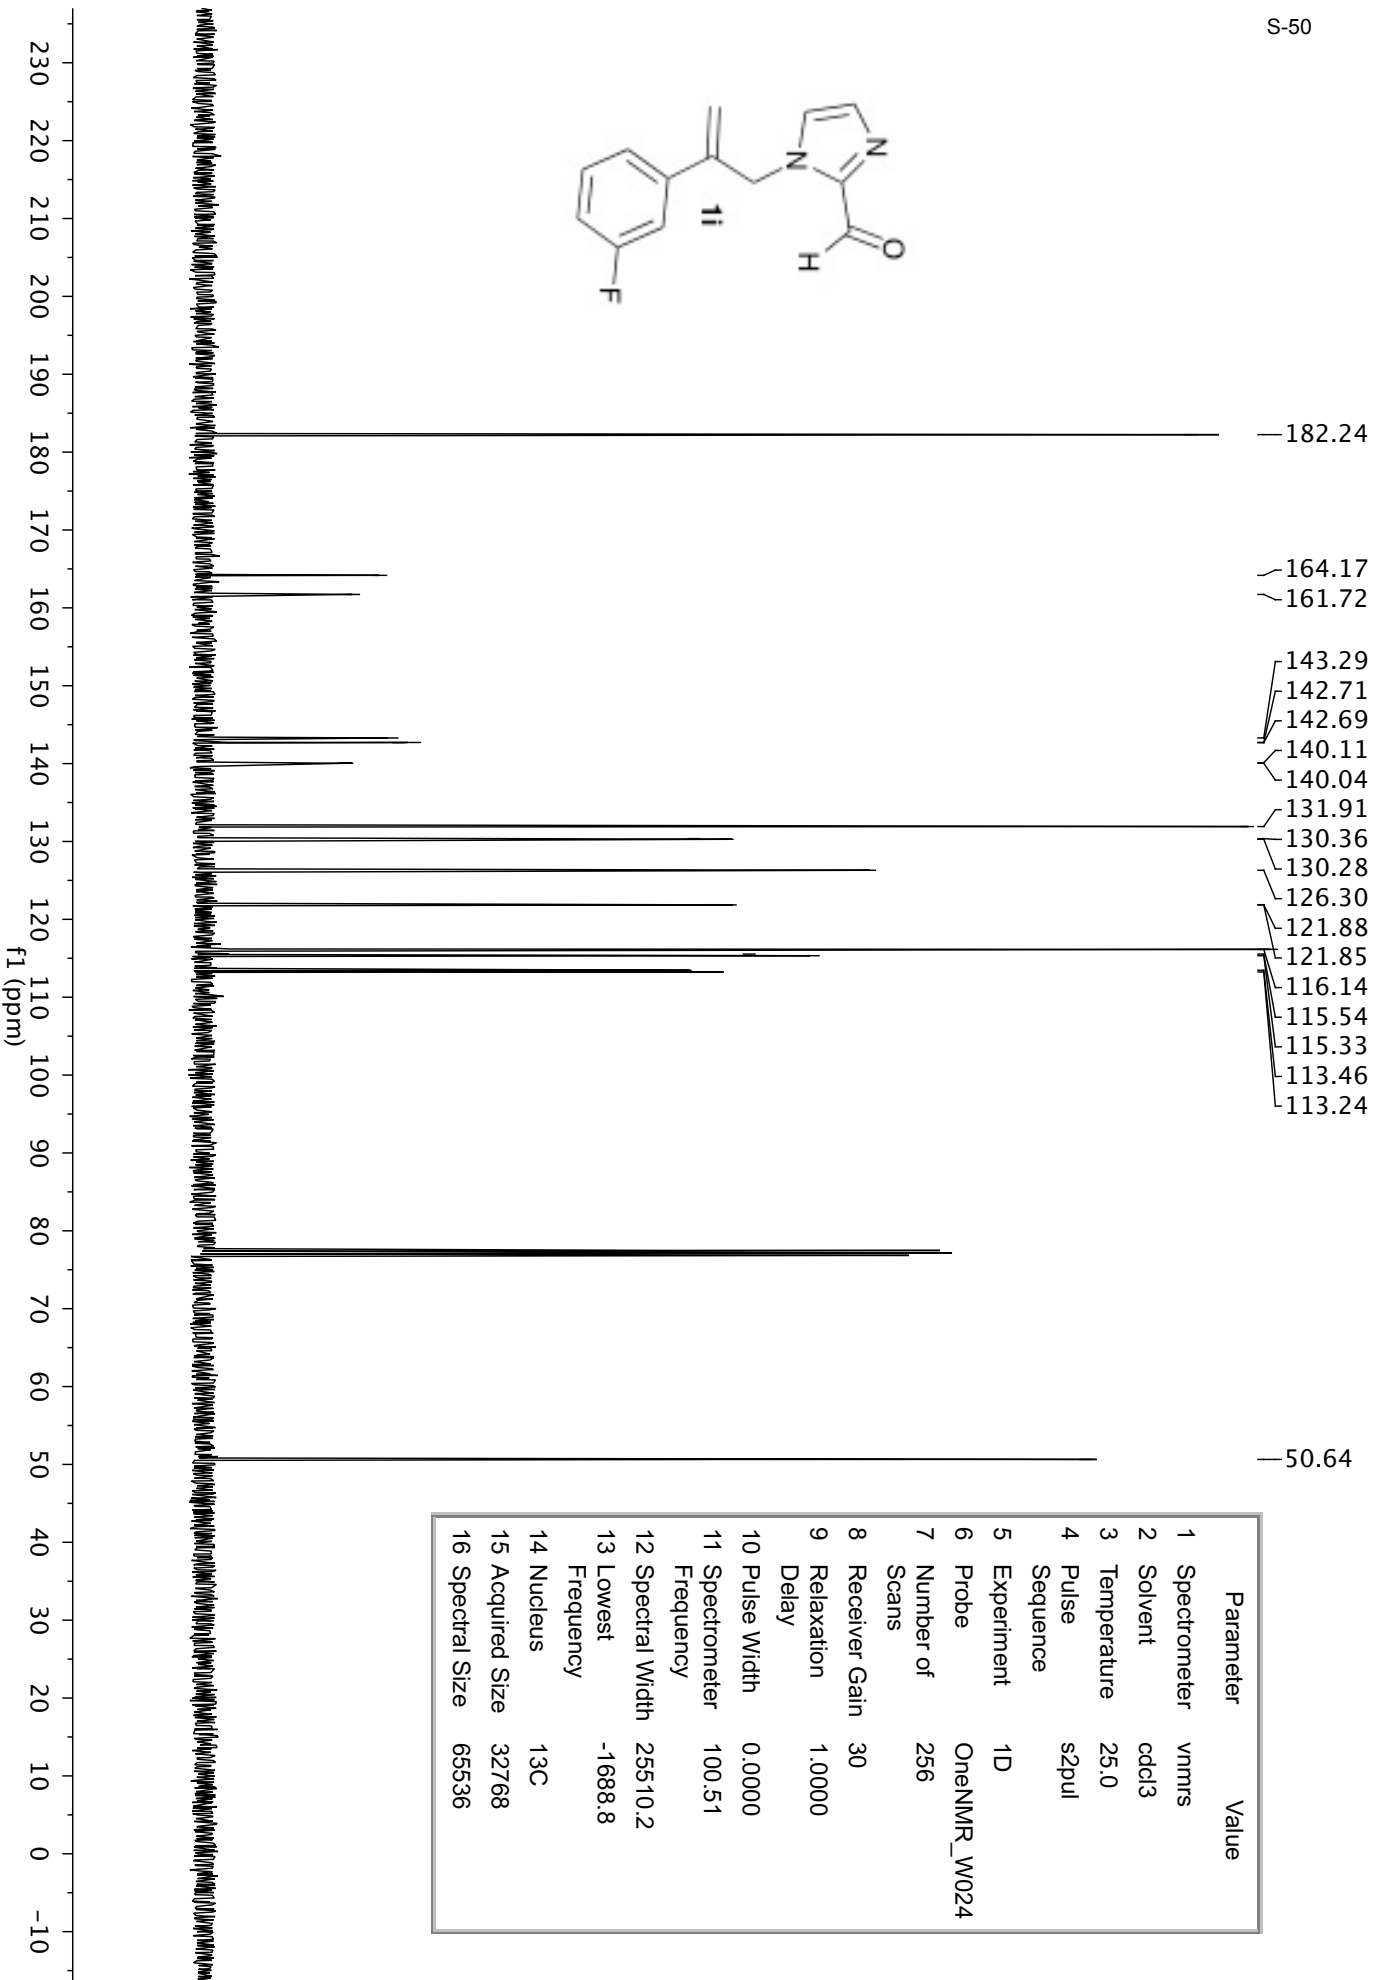

--112.71

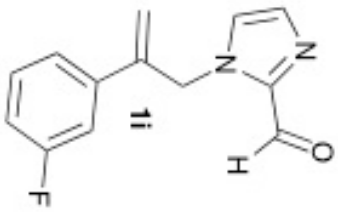

| Parameter                 | Value       |
|---------------------------|-------------|
| 1 Spectrometer            | vmrns       |
| 2 Solvent                 | cdcl3       |
| 3 Temperature             | 25.0        |
| 4 Pulse Sequence          | s2pul       |
| 5 Experiment              | 1D          |
| 6 Probe                   | OneNMR_W024 |
| 7 Number of Scans         | 16          |
| 8 Receiver Gain           | 52          |
| 9 Relaxation Delay        | 1.0000      |
| 10 Pulse Width            | 0.0000      |
| 11 Spectrometer Frequency | 376.05      |
| 12 Spectral Width         | 89285.7     |
| 13 Lowest Frequency       | -76610.2    |
| 14 Nucleus                | 19F         |
| 15 Acquired Size          | 65536       |
| 16 Spectral Size          | 131072      |

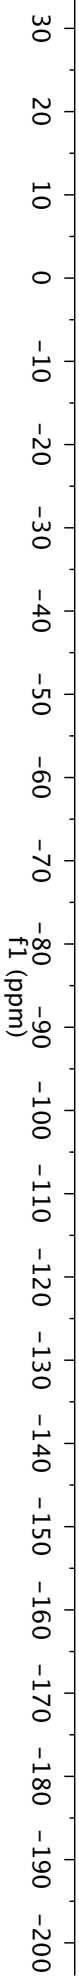

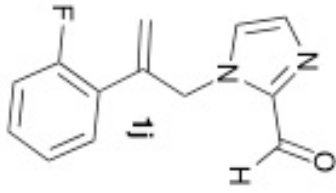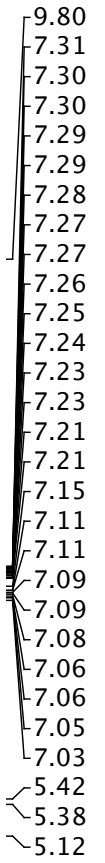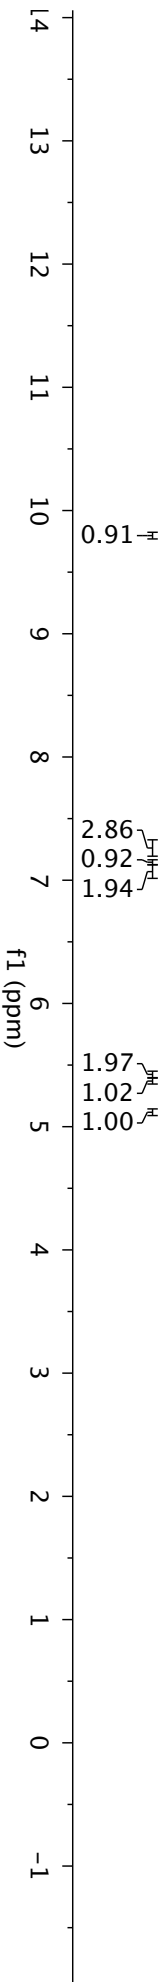

| Parameter                 | Value          |
|---------------------------|----------------|
| 1 Spectrometer            | nmrs           |
| 2 Solvent                 | cdcl3          |
| 3 Temperature             | 25.0           |
| 4 Pulse Sequence          | szpul          |
| 5 Experiment              | 1D             |
| 6 Probe                   | OneNMR_W024    |
| 7 Number of Scans         | 8              |
| 8 Receiver Gain           | 24             |
| 9 Relaxation Delay        | 1.0000         |
| 10 Pulse Width            | 0.0000         |
| 11 Spectrometer Frequency | 399.69         |
| 12 Spectral Width         | 6410.3         |
| 13 Lowest Frequency       | -790.7         |
| 14 Nucleus                | <sup>1</sup> H |
| 15 Acquired Size          | 16384          |
| 16 Spectral Size          | 65536          |

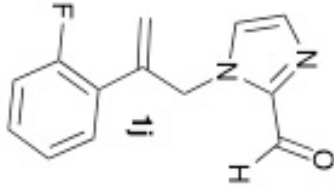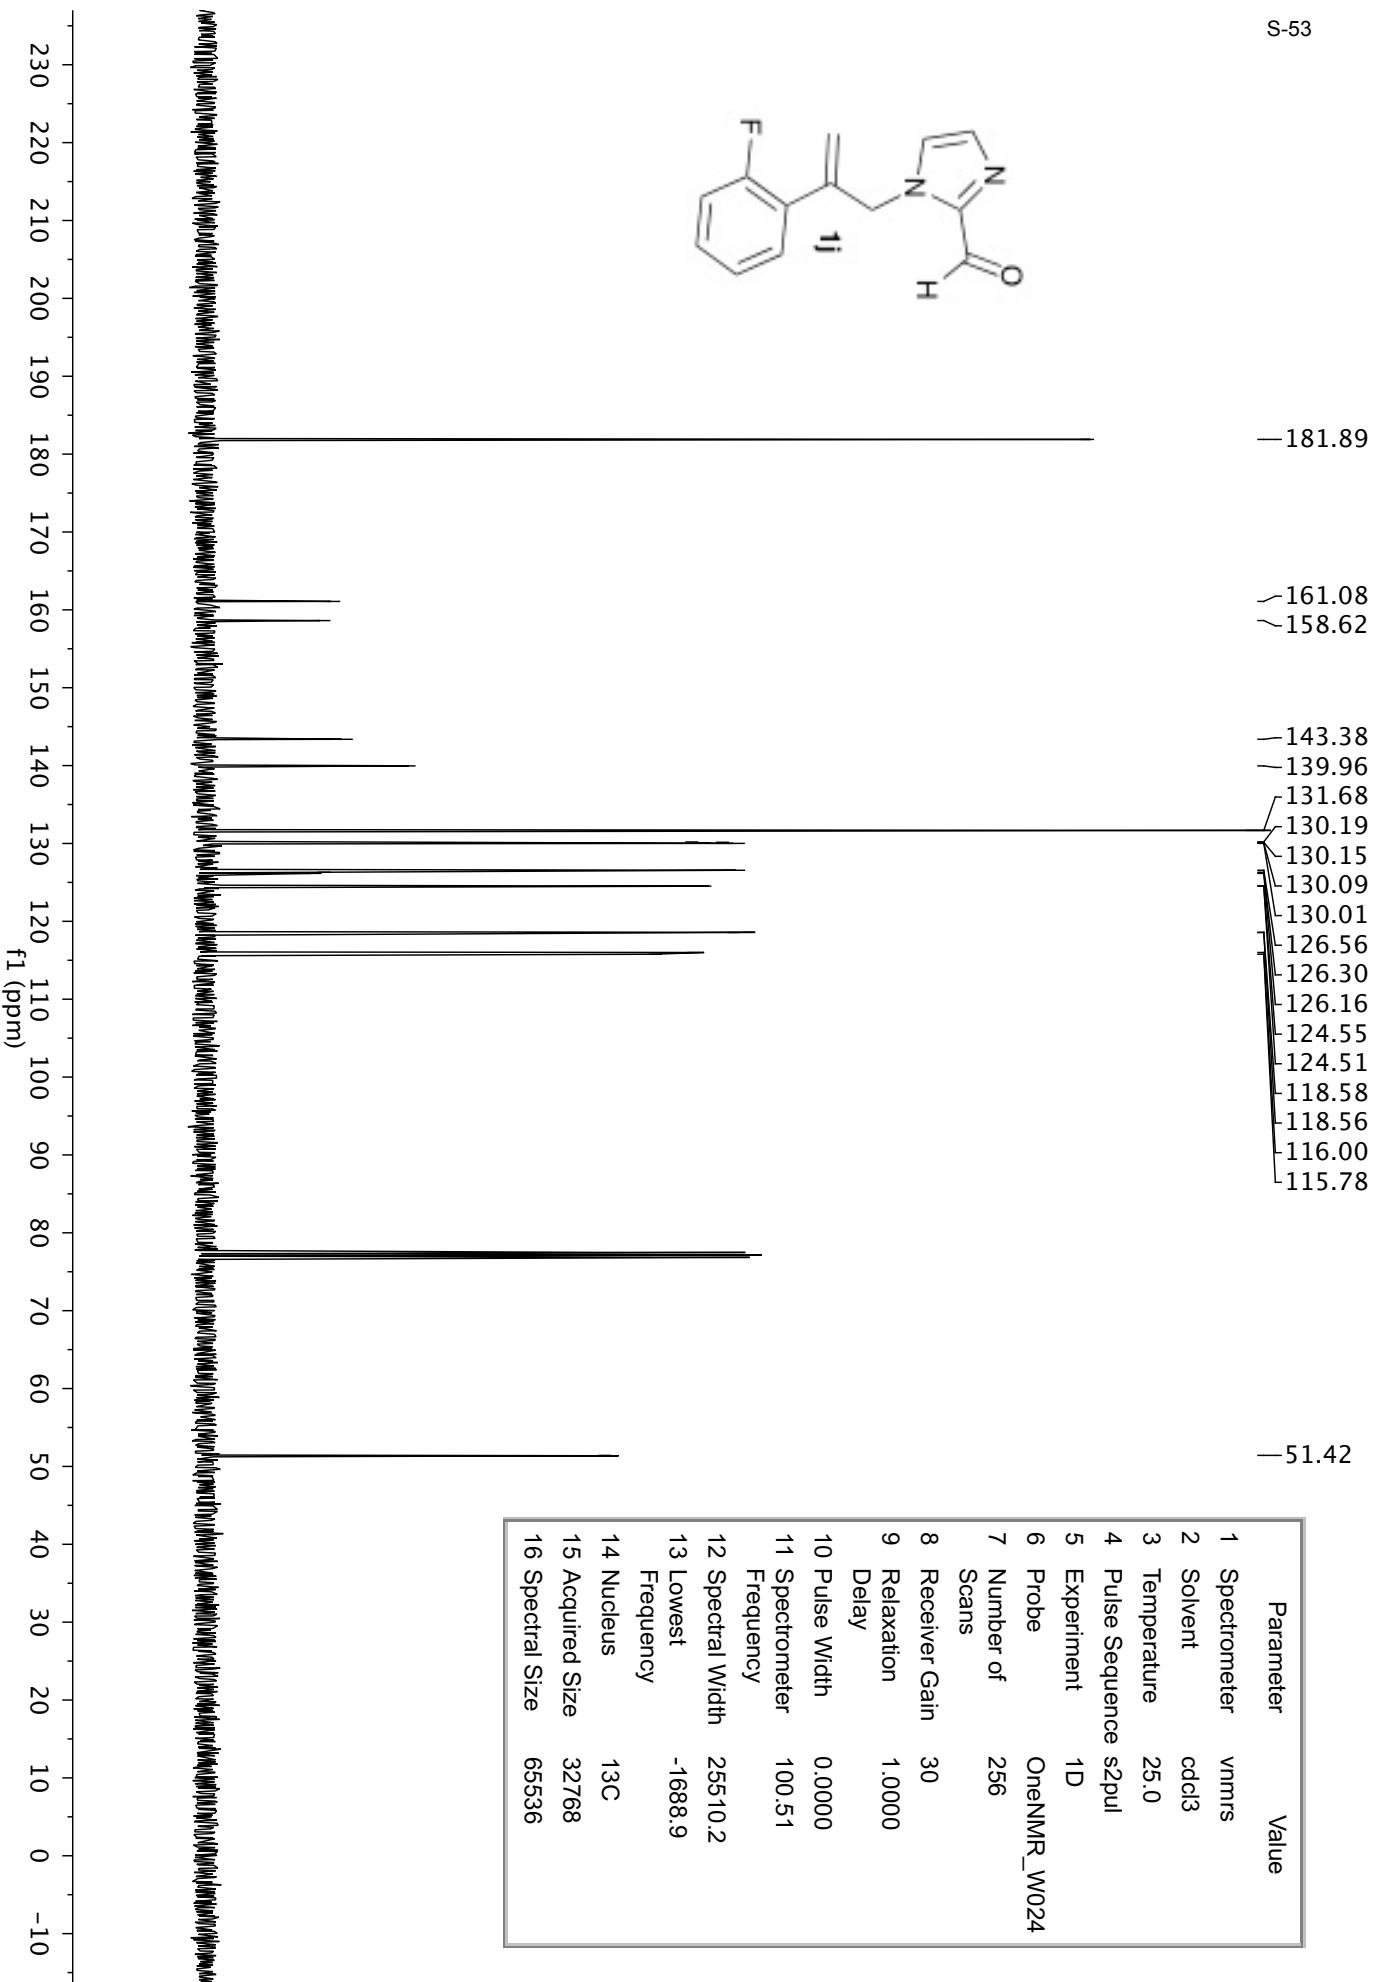

--115.31

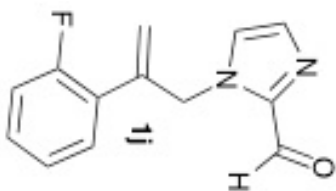

| Parameter                 | Value        |
|---------------------------|--------------|
| 1 Spectrometer            | vmrms        |
| 2 Solvent                 | cdc13        |
| 3 Temperature             | 25.0         |
| 4 Pulse Sequence          | s2pul        |
| 5 Experiment              | 1D           |
| 6 Probe                   | OneNMRR_W024 |
| 7 Number of Scans         | 16           |
| 8 Receiver Gain           | 52           |
| 9 Relaxation Delay        | 1.0000       |
| 10 Pulse Width            | 0.0000       |
| 11 Spectrometer Frequency | 376.05       |
| 12 Spectral Width         | 89285.7      |
| 13 Lowest Frequency       | -76610.2     |
| 14 Nucleus                | 19F          |
| 15 Acquired Size          | 65536        |
| 16 Spectral Size          | 131072       |

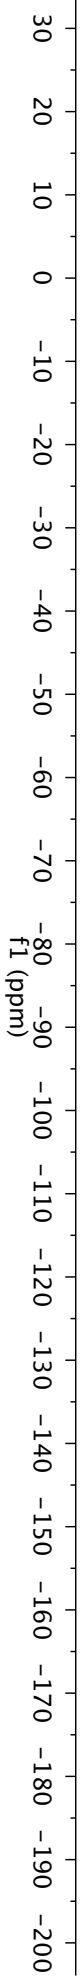

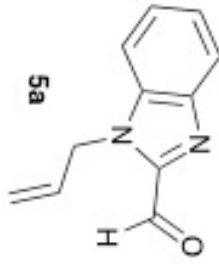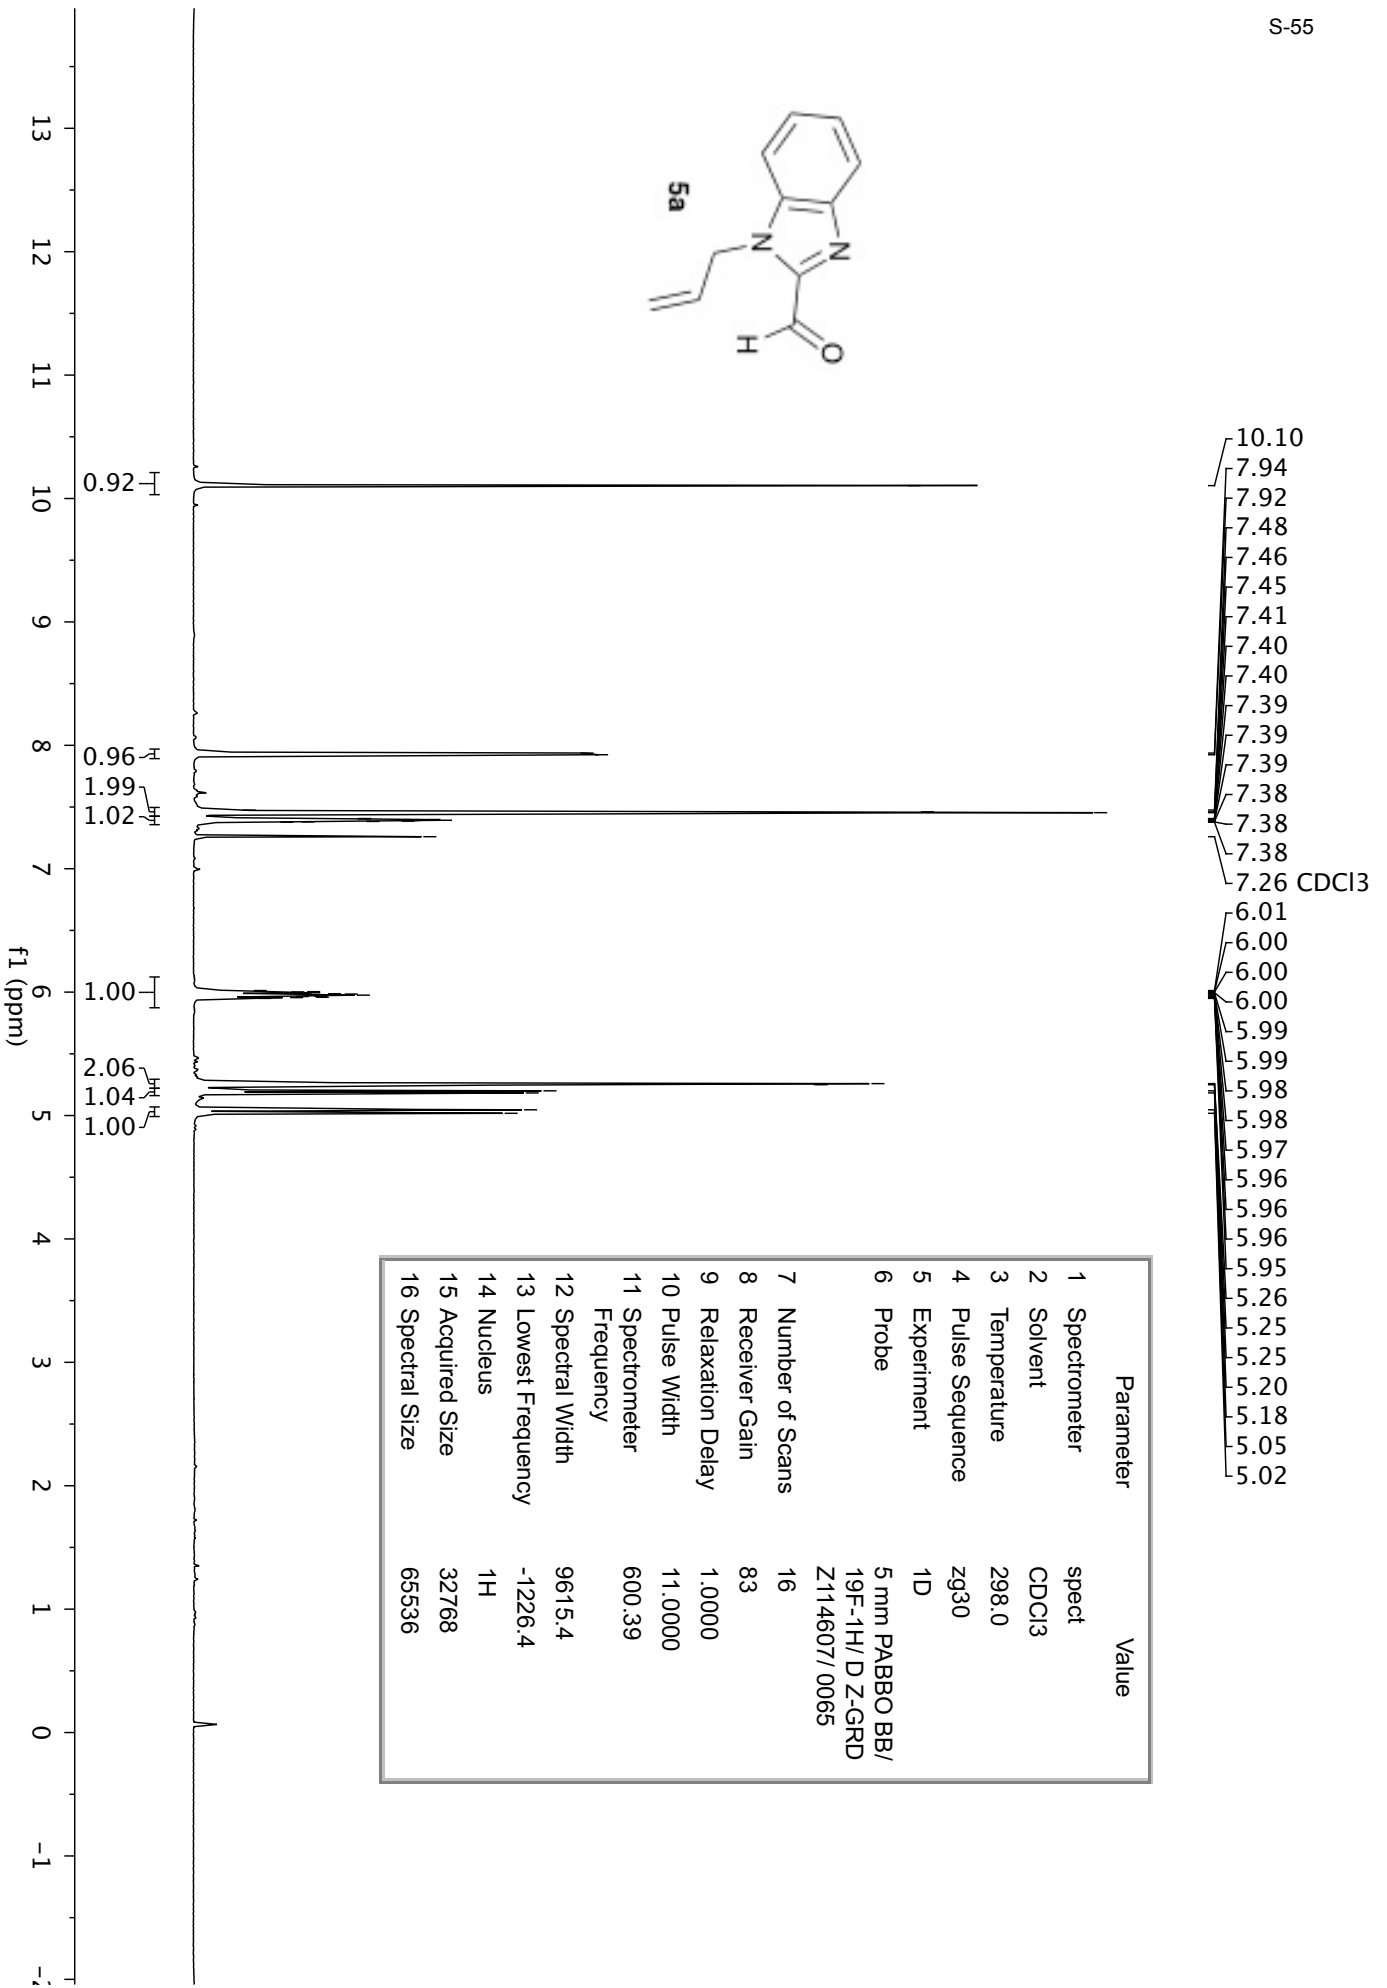

— 184.89

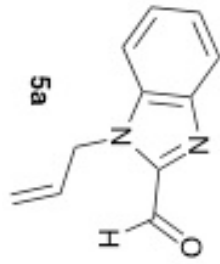

145.85

142.98

136.43

132.11

127.04

124.27

122.55

117.83

111.25

— 46.94

| Parameter                 | Value                                             |
|---------------------------|---------------------------------------------------|
| 1 Spectrometer            | spect                                             |
| 2 Solvent                 | CDCl3                                             |
| 3 Temperature             | 298.0                                             |
| 4 Pulse Sequence          | zgpg30                                            |
| 5 Experiment              | 1D                                                |
| 6 Probe                   | 5 mm PABBO BB/<br>19F-1H/ D Z-GRD<br>Z114607/0065 |
| 7 Number of Scans         | 232                                               |
| 8 Receiver Gain           | 177                                               |
| 9 Relaxation Delay        | 3.0000                                            |
| 10 Pulse Width            | 11.6000                                           |
| 11 Spectrometer Frequency | 150.98                                            |
| 12 Spectral Width         | 37878.8                                           |
| 13 Lowest Frequency       | -7601.2                                           |
| 14 Nucleus                | 13C                                               |
| 15 Acquired Size          | 32768                                             |
| 16 Spectral Size          | 65536                                             |

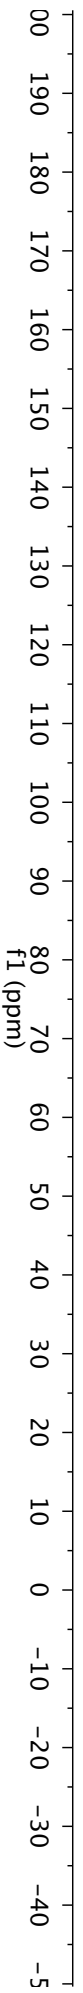



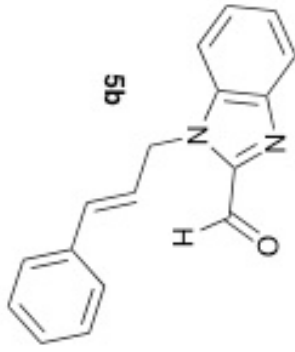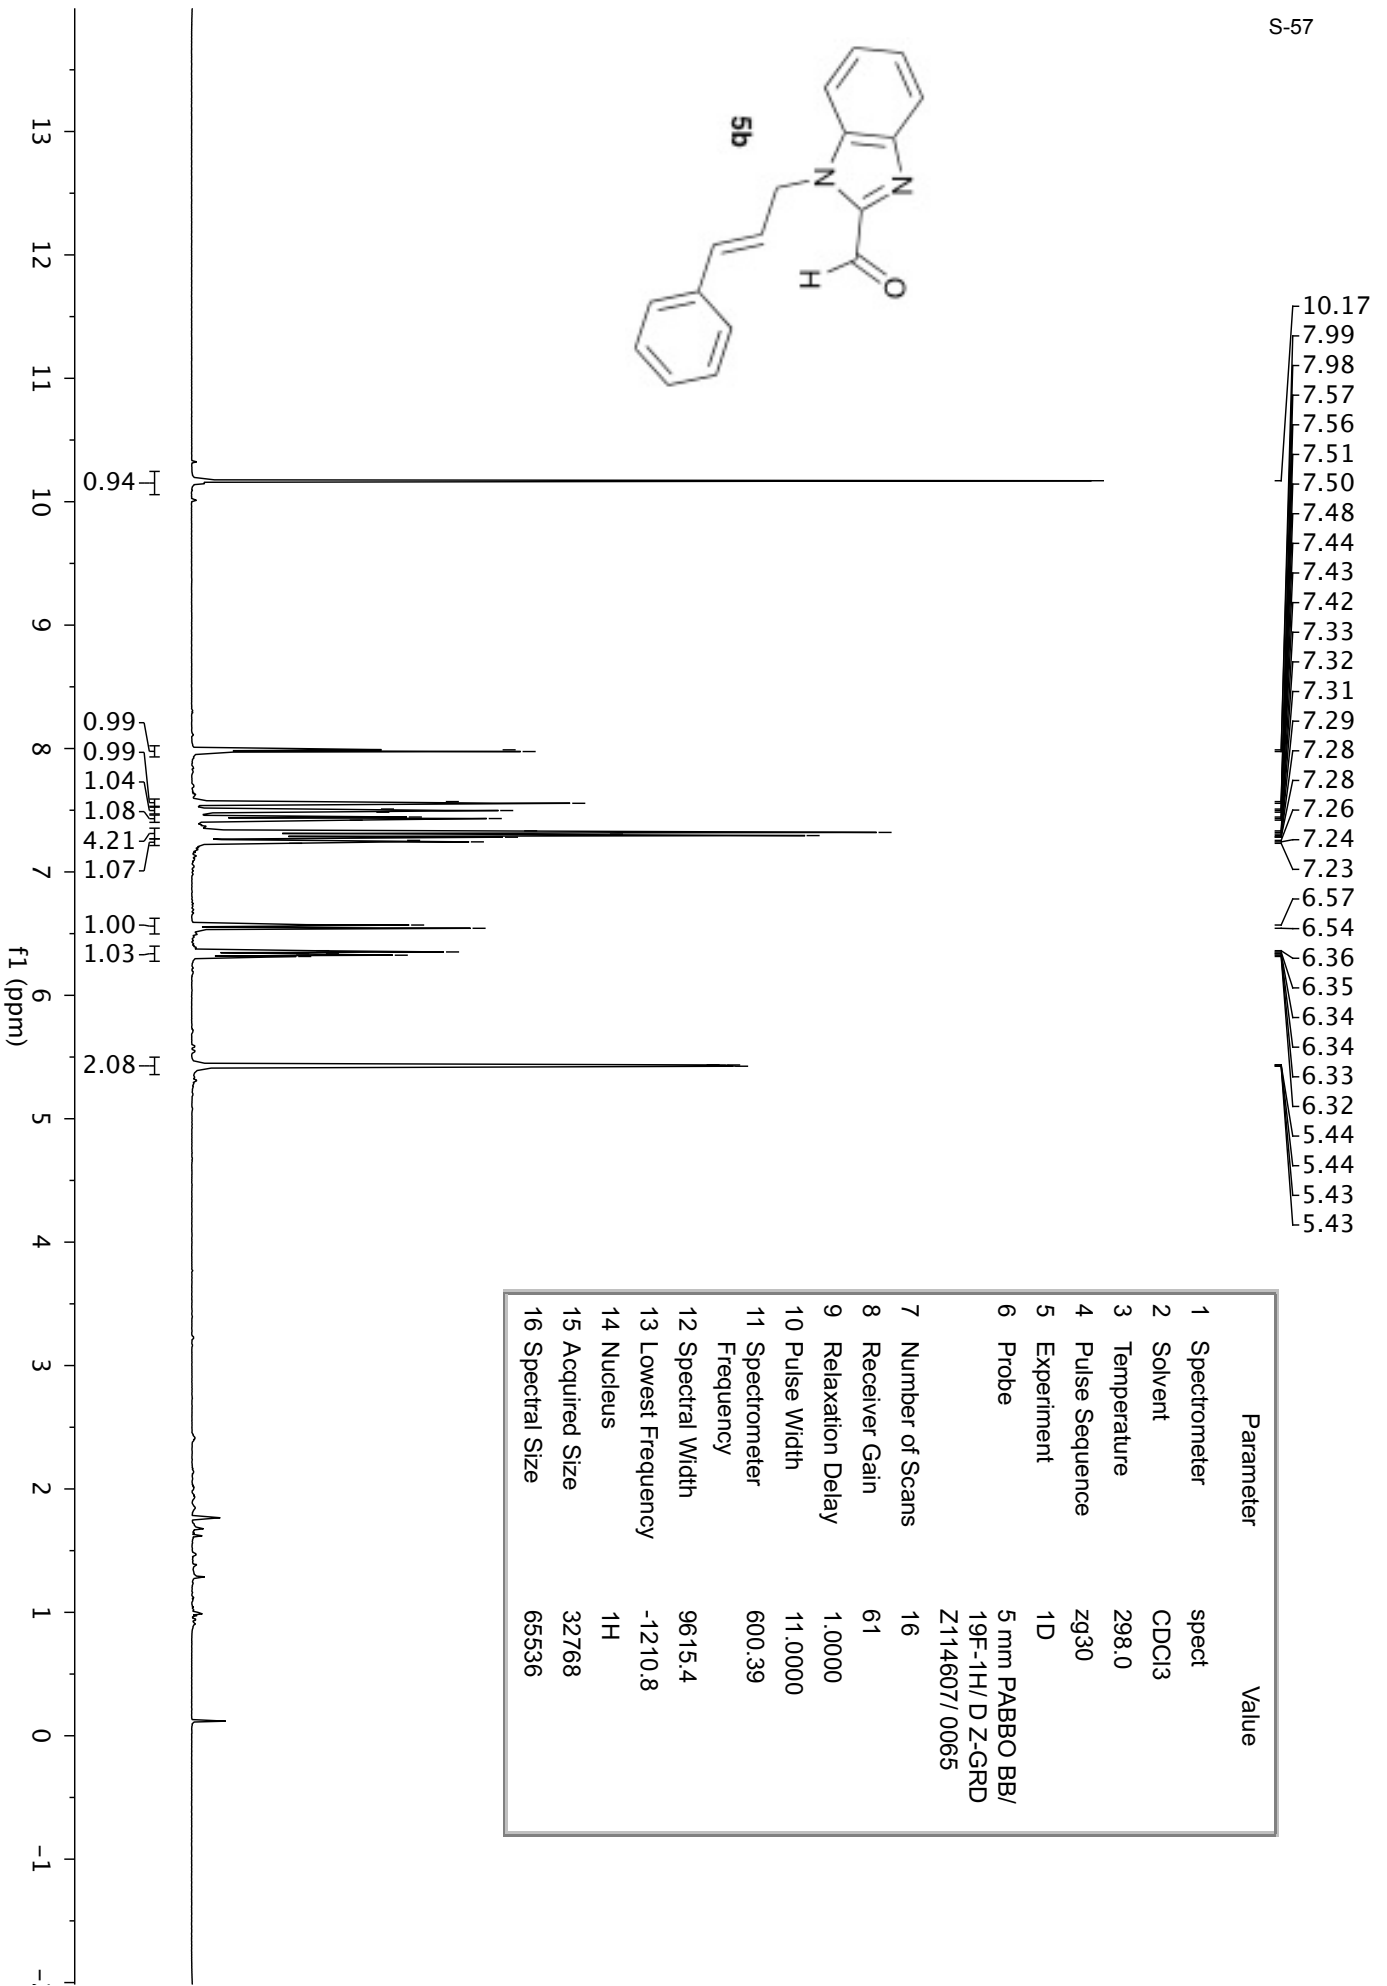

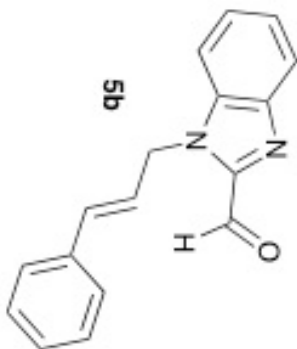

- 184.92
- 145.77
- 142.98
- 136.34
- 135.84
- 133.36
- 128.65
- 128.19
- 127.06
- 126.60
- 124.27
- 123.18
- 122.54
- 111.24

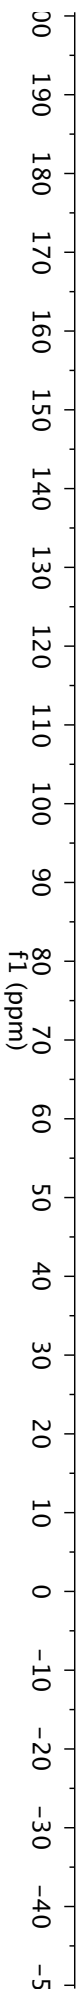

— 46.57

| Parameter                 | Value                                              |
|---------------------------|----------------------------------------------------|
| 1 Spectrometer            | spect                                              |
| 2 Solvent                 | CDCl3                                              |
| 3 Temperature             | 298.0                                              |
| 4 Pulse Sequence          | zpgp30                                             |
| 5 Experiment              | 1D                                                 |
| 6 Probe                   | 5 mm PABBO BB/<br>19F-1H/ D-Z-GRD<br>Z114607/ 0065 |
| 7 Number of Scans         | 225                                                |
| 8 Receiver Gain           | 177                                                |
| 9 Relaxation Delay        | 3.0000                                             |
| 10 Pulse Width            | 11.6000                                            |
| 11 Spectrometer Frequency | 150.98                                             |
| 12 Spectral Width         | 37878.8                                            |
| 13 Lowest Frequency       | -7612.7                                            |
| 14 Nucleus                | 13C                                                |
| 15 Acquired Size          | 32768                                              |
| 16 Spectral Size          | 65536                                              |

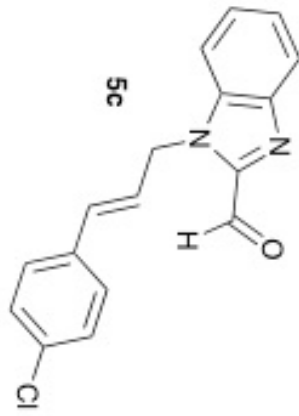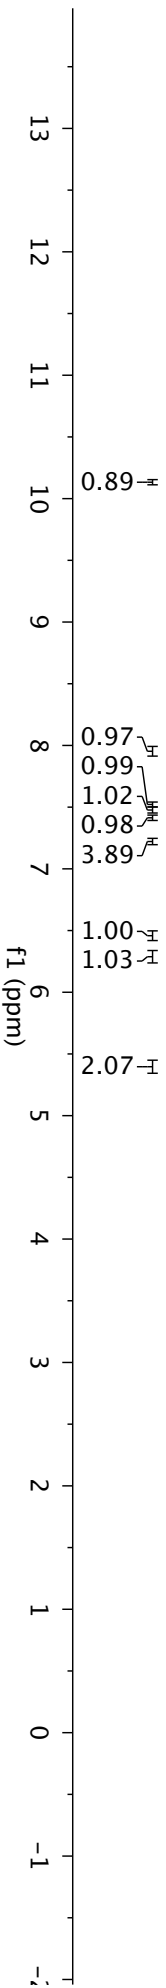

10.13  
7.96  
7.95  
7.53  
7.51  
7.49  
7.49  
7.48  
7.47  
7.46  
7.42  
7.42  
7.41  
7.41  
7.40  
7.40  
7.24  
7.23  
7.22  
7.21  
6.47  
6.45  
6.31  
6.30  
6.29  
6.29  
6.28  
6.27  
5.40  
5.40  
5.39  
5.39

| Parameter                    | Value                                              |
|------------------------------|----------------------------------------------------|
| 1 Spectrometer               | spect                                              |
| 2 Solvent                    | CDCl3                                              |
| 3 Temperature                | 298.0                                              |
| 4 Pulse Sequence             | zg30                                               |
| 5 Experiment                 | 1D                                                 |
| 6 Probe                      | 5 mm PABBO BB/<br>19F-1H/ D Z-GRD<br>Z114607/ 0065 |
| 7 Number of Scans            | 16                                                 |
| 8 Receiver Gain              | 68                                                 |
| 9 Relaxation Delay           | 1.0000                                             |
| 10 Pulse Width               | 11.0000                                            |
| 11 Spectrometer<br>Frequency | 600.39                                             |
| 12 Spectral Width            | 9615.4                                             |
| 13 Lowest Frequency          | -1225.8                                            |
| 14 Nucleus                   | <sup>1</sup> H                                     |
| 15 Acquired Size             | 32768                                              |
| 16 Spectral Size             | 65536                                              |

— 185.01

145.81  
 143.04  
 136.35  
 134.39  
 133.94  
 132.12  
 128.87  
 127.86  
 127.20  
 124.39  
 123.94  
 122.68  
 — 111.14

— 46.49

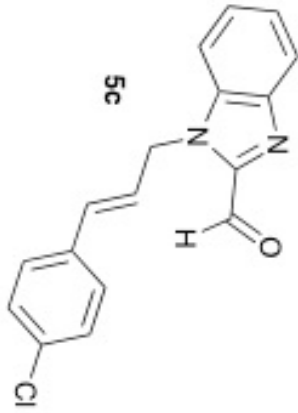

| Parameter                    | Value                                                  |
|------------------------------|--------------------------------------------------------|
| 1 Spectrometer               | spect                                                  |
| 2 Solvent                    | CDCl3                                                  |
| 3 Temperature                | 298.1                                                  |
| 4 Pulse Sequence             | zpgp30                                                 |
| 5 Experiment                 | 1D                                                     |
| 6 Probe                      | 5 mm PABBO<br>BB/19F-1H/D<br>Z-GRD<br>Z114607/<br>0065 |
| 7 Number of Scans            | 288                                                    |
| 8 Receiver Gain              | 177                                                    |
| 9 Relaxation Delay           | 3.0000                                                 |
| 10 Pulse Width               | 11.6000                                                |
| 11 Spectrometer<br>Frequency | 150.98                                                 |
| 12 Spectral Width            | 37878.8                                                |
| 13 Lowest Frequency          | -7602.6                                                |
| 14 Nucleus                   | 13C                                                    |
| 15 Acquired Size             | 32768                                                  |
| 16 Spectral Size             | 65536                                                  |

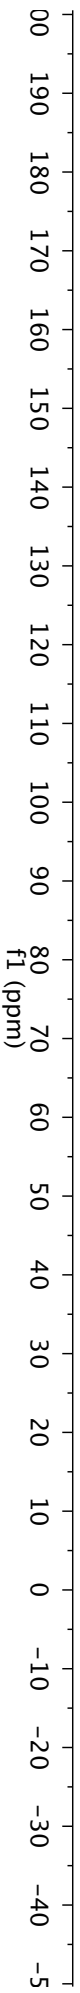

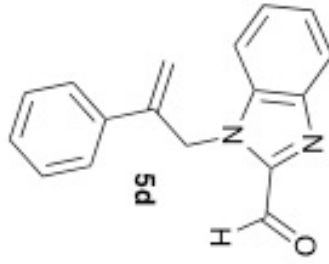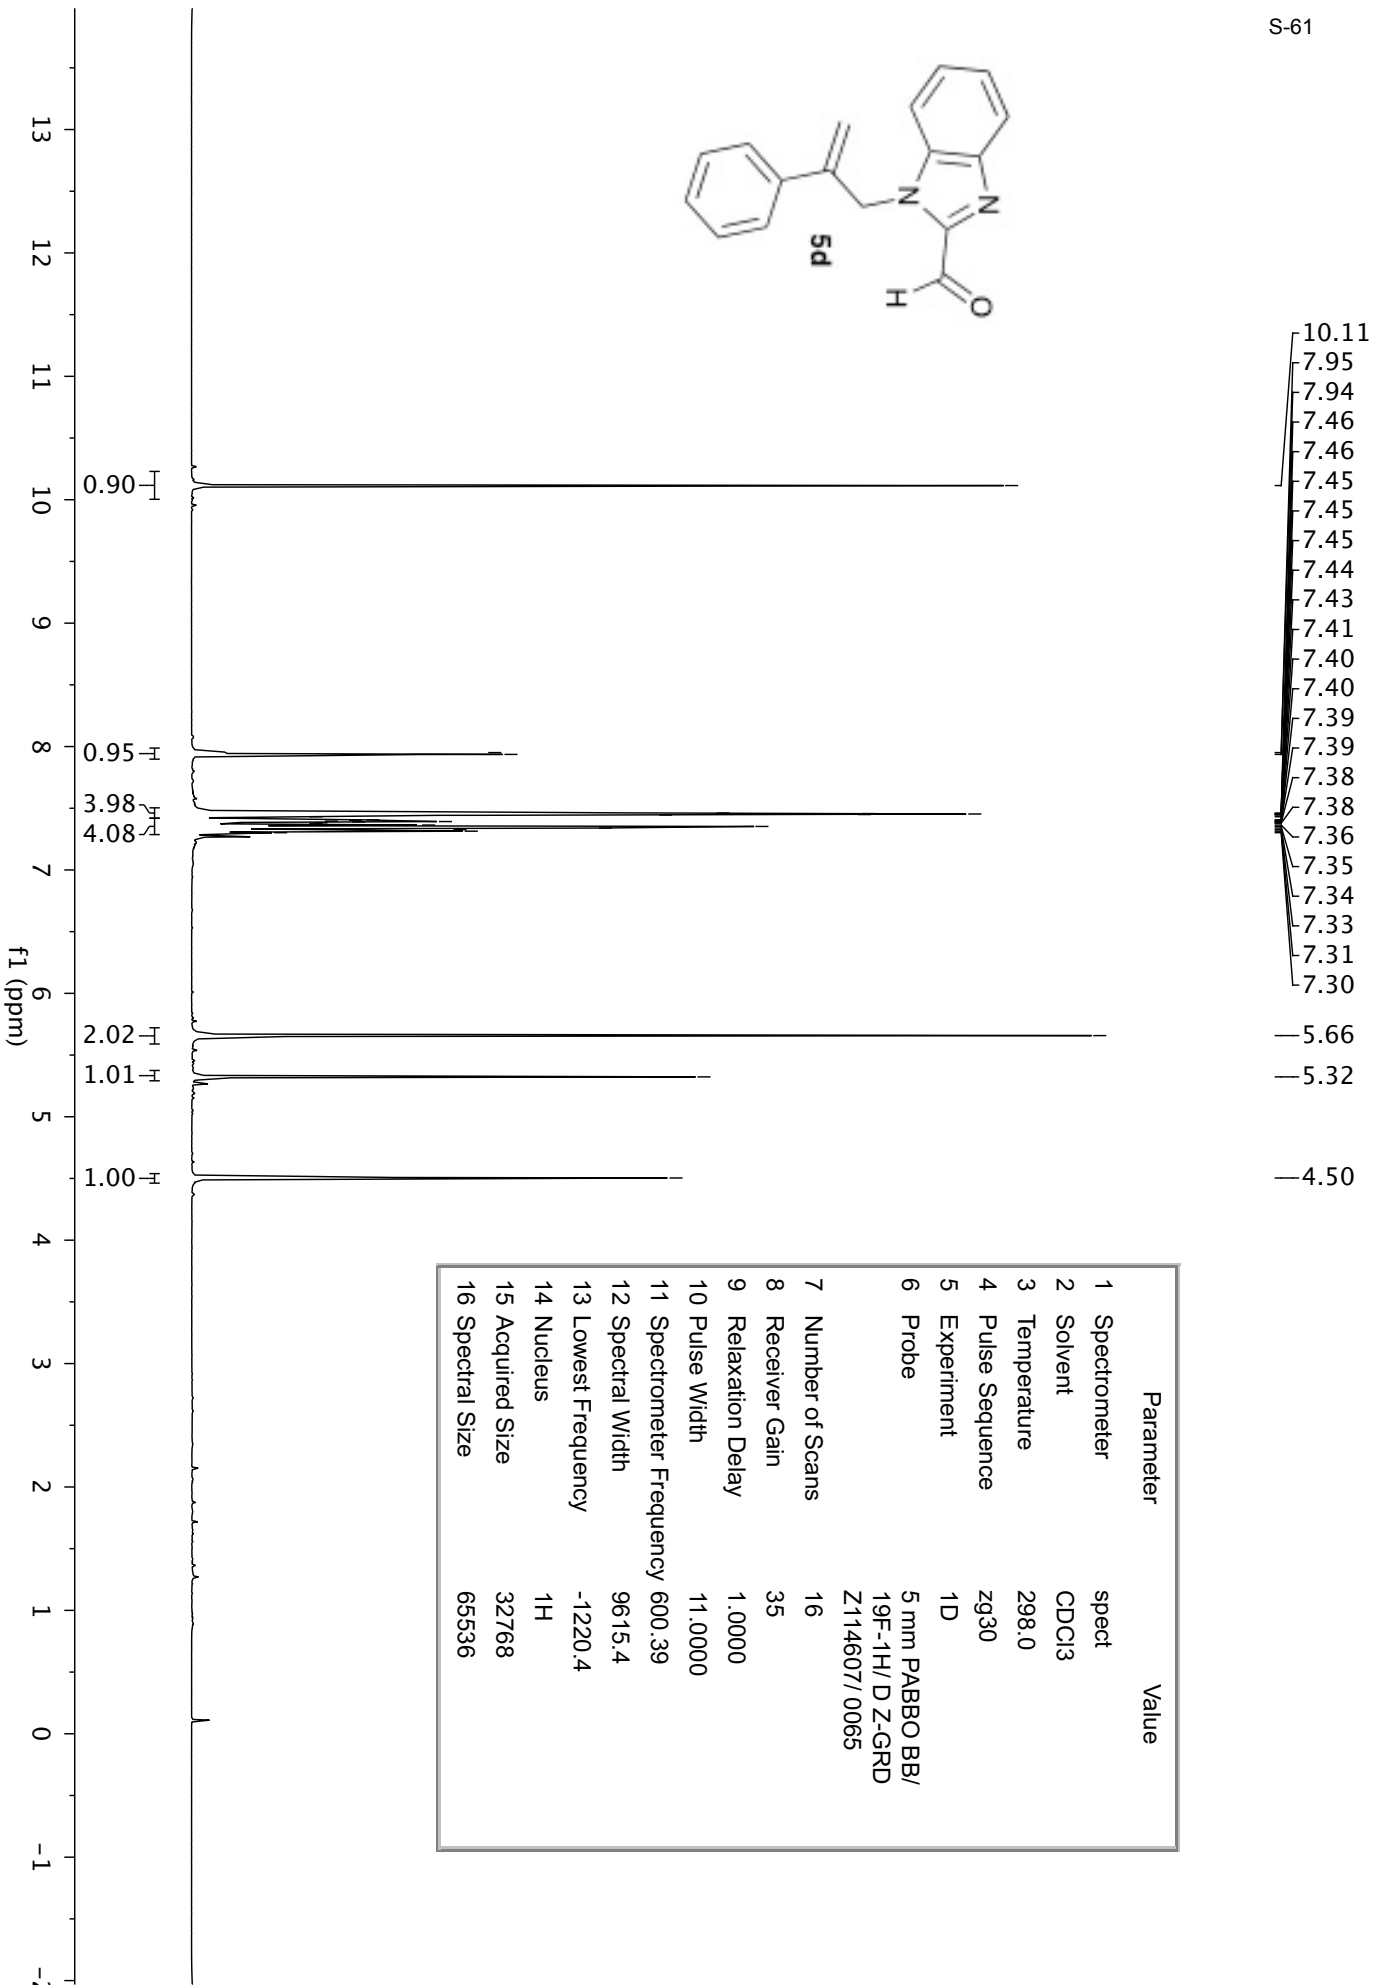

— 184.89

146.06  
 143.31  
 142.93  
 138.53  
 136.74  
 128.73  
 128.50  
 127.18  
 126.36  
 124.35  
 122.56  
 113.11  
 111.55

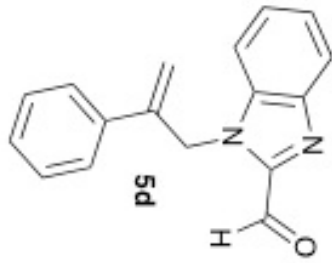

— 48.22

| Parameter                 | Value                                            |
|---------------------------|--------------------------------------------------|
| 1 Spectrometer            | spect                                            |
| 2 Solvent                 | CDCl3                                            |
| 3 Temperature             | 298.0                                            |
| 4 Pulse Sequence          | zgpg30                                           |
| 5 Experiment              | 1D                                               |
| 6 Probe                   | 5 mm PABBO BB/<br>19F-1H/D Z-GRD<br>Z114607/0065 |
| 7 Number of Scans         | 361                                              |
| 8 Receiver Gain           | 177                                              |
| 9 Relaxation Delay        | 3.0000                                           |
| 10 Pulse Width            | 11.6000                                          |
| 11 Spectrometer Frequency | 150.98                                           |
| 12 Spectral Width         | 37878.8                                          |
| 13 Lowest Frequency       | -7601.8                                          |
| 14 Nucleus                | <sup>13</sup> C                                  |
| 15 Acquired Size          | 32768                                            |
| 16 Spectral Size          | 65536                                            |

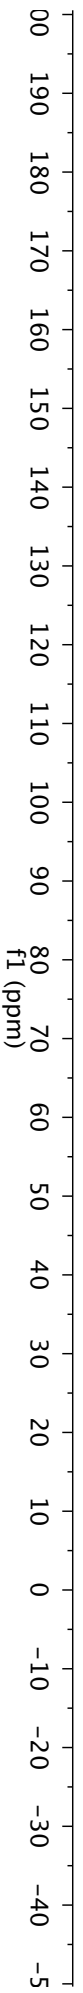

| Parameter                 | Value         |
|---------------------------|---------------|
| 1 Spectrometer            | vmnrs         |
| 2 Solvent                 | cdcl3         |
| 3 Temperature             | 25.0          |
| 4 Pulse Sequence          | szpul         |
| 5 Experiment              | 1D            |
| 6 Probe                   | OneNMNMR_W024 |
| 7 Number of Scans         | 8             |
| 8 Receiver Gain           | 18            |
| 9 Relaxation Delay        | 1.0000        |
| 10 Pulse Width            | 0.0000        |
| 11 Spectrometer Frequency | 399.69        |
| 12 Spectral Width         | 6410.3        |
| 13 Lowest Frequency       | -786.7        |
| 14 Nucleus                | 1H            |
| 15 Acquired Size          | 16384         |
| 16 Spectral Size          | 65536         |

10.05

- 7.66
- 7.19
- 6.02
- 6.01
- 6.00
- 5.99
- 5.98
- 5.97
- 5.97
- 5.96
- 5.94
- 5.93
- 5.21
- 5.20
- 5.20
- 5.19
- 5.19
- 5.18
- 5.17
- 5.17
- 5.16
- 5.02
- 5.02
- 5.02
- 4.98
- 4.98
- 4.97
- 2.42
- 2.39

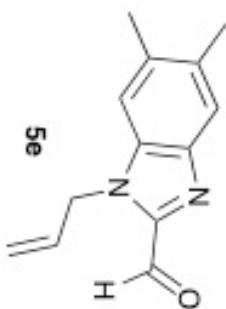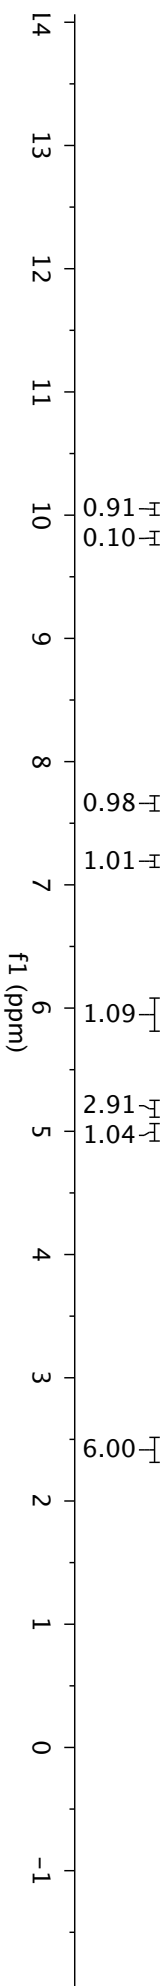

| Parameter                 | Value             |
|---------------------------|-------------------|
| 1 Spectrometer            | nmrns             |
| 2 Solvent                 | cdcl3             |
| 3 Temperature             | 25.0              |
| 4 Pulse Sequence          | szpul             |
| 5 Experiment              | 1D                |
| 6 Probe                   | OneNMNMR_w0<br>24 |
| 7 Number of Scans         | 256               |
| 8 Receiver Gain           | 30                |
| 9 Relaxation Delay        | 1.0000            |
| 10 Pulse Width            | 0.0000            |
| 11 Spectrometer Frequency | 100.51            |
| 12 Spectral Width         | 25510.2           |
| 13 Lowest Frequency       | -1685.0           |
| 14 Nucleus                | <sup>13</sup> C   |
| 15 Acquired Size          | 32768             |
| 16 Spectral Size          | 65536             |

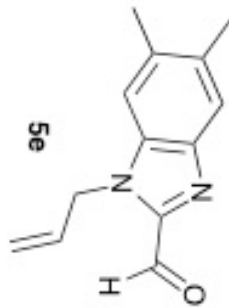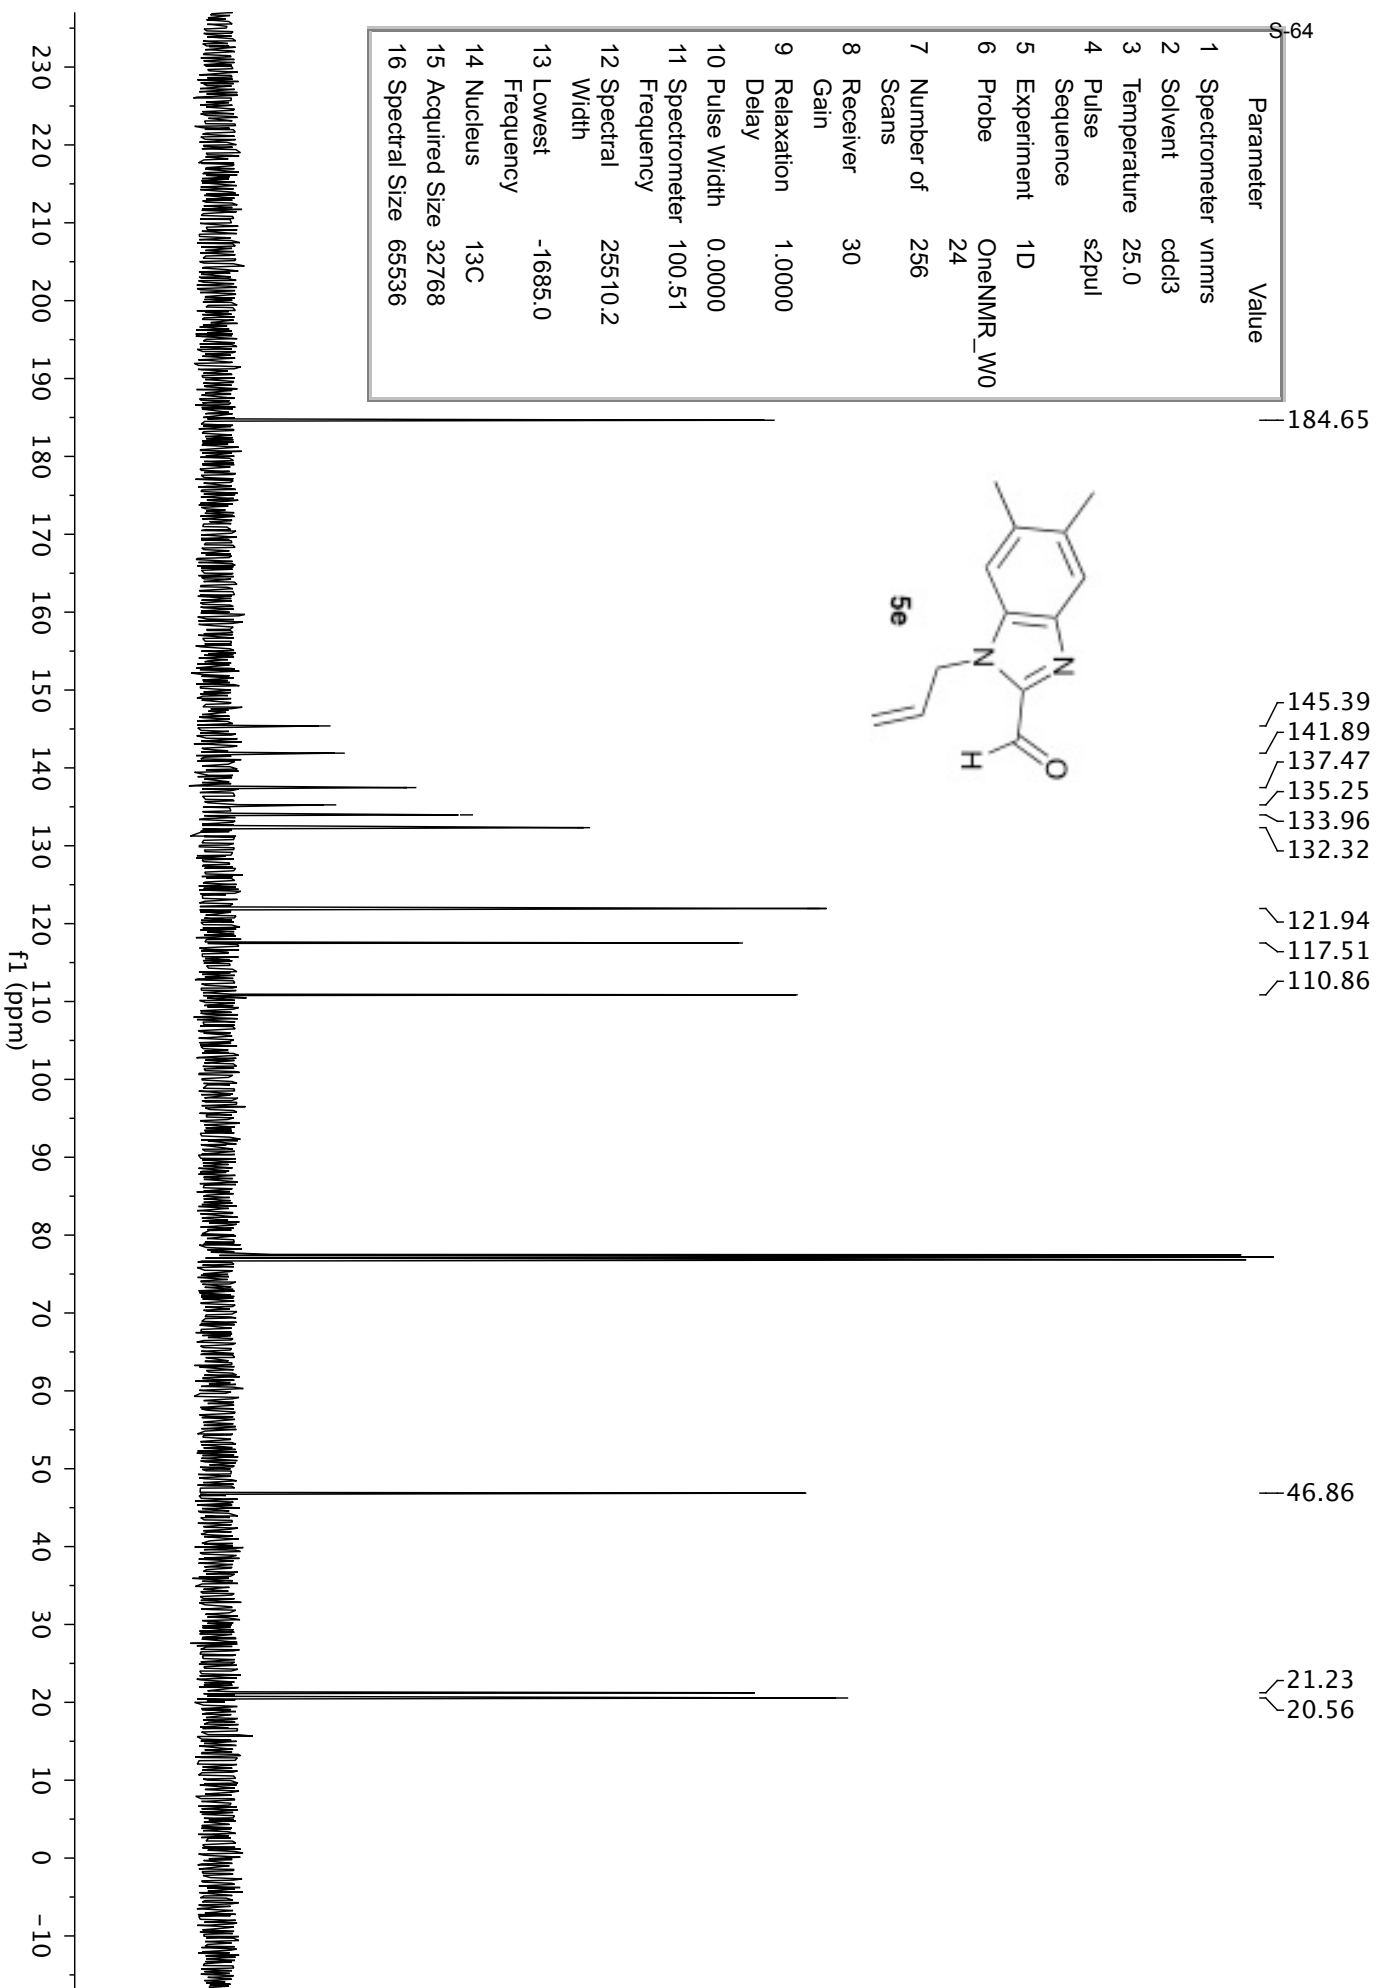



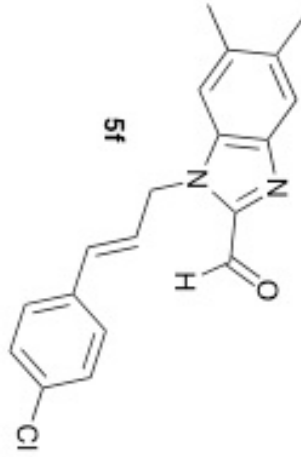

— 10.07

7.68  
7.25  
7.22  
6.43  
6.39  
6.31  
6.30  
6.29  
6.27  
6.26  
6.25  
5.35  
5.33

2.42  
2.40

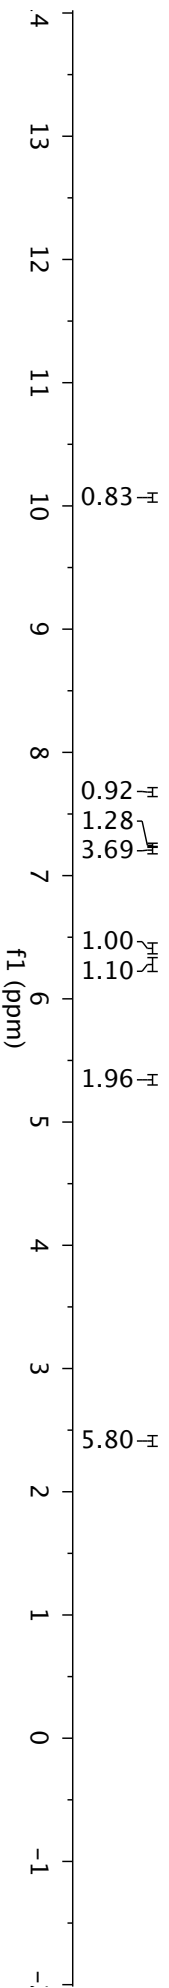

| Parameter                 | Value          |
|---------------------------|----------------|
| 1 Spectrometer            | vmrms          |
| 2 Solvent                 | cdcl3          |
| 3 Temperature             | 25.0           |
| 4 Pulse Sequence          | s2pul          |
| 5 Experiment              | 1D             |
| 6 Probe                   | OneNMR_W024    |
| 7 Number of Scans         | 8              |
| 8 Receiver Gain           | 18             |
| 9 Relaxation Delay        | 1.0000         |
| 10 Pulse Width            | 0.0000         |
| 11 Spectrometer Frequency | 399.69         |
| 12 Spectral Width         | 6410.3         |
| 13 Lowest Frequency       | -805.7         |
| 14 Nucleus                | <sup>1</sup> H |
| 15 Acquired Size          | 16384          |
| 16 Spectral Size          | 65536          |

| Parameter                 | Value           |
|---------------------------|-----------------|
| 1 Spectrometer            | vmrms           |
| 2 Solvent                 | cdcl3           |
| 3 Temperature             | 25.0            |
| 4 Pulse Sequence          | s2pul           |
| 5 Experiment              | 1D              |
| 6 Probe                   | OneNMW_024      |
| 7 Number of Scans         | 256             |
| 8 Receiver Gain           | 30              |
| 9 Relaxation Delay        | 1.0000          |
| 10 Pulse Width            | 0.0000          |
| 11 Spectrometer Frequency | 100.51          |
| 12 Spectral Width         | 25510.2         |
| 13 Lowest Frequency       | -1688.7         |
| 14 Nucleus                | <sup>13</sup> C |
| 15 Acquired Size          | 32768           |
| 16 Spectral Size          | 65536           |

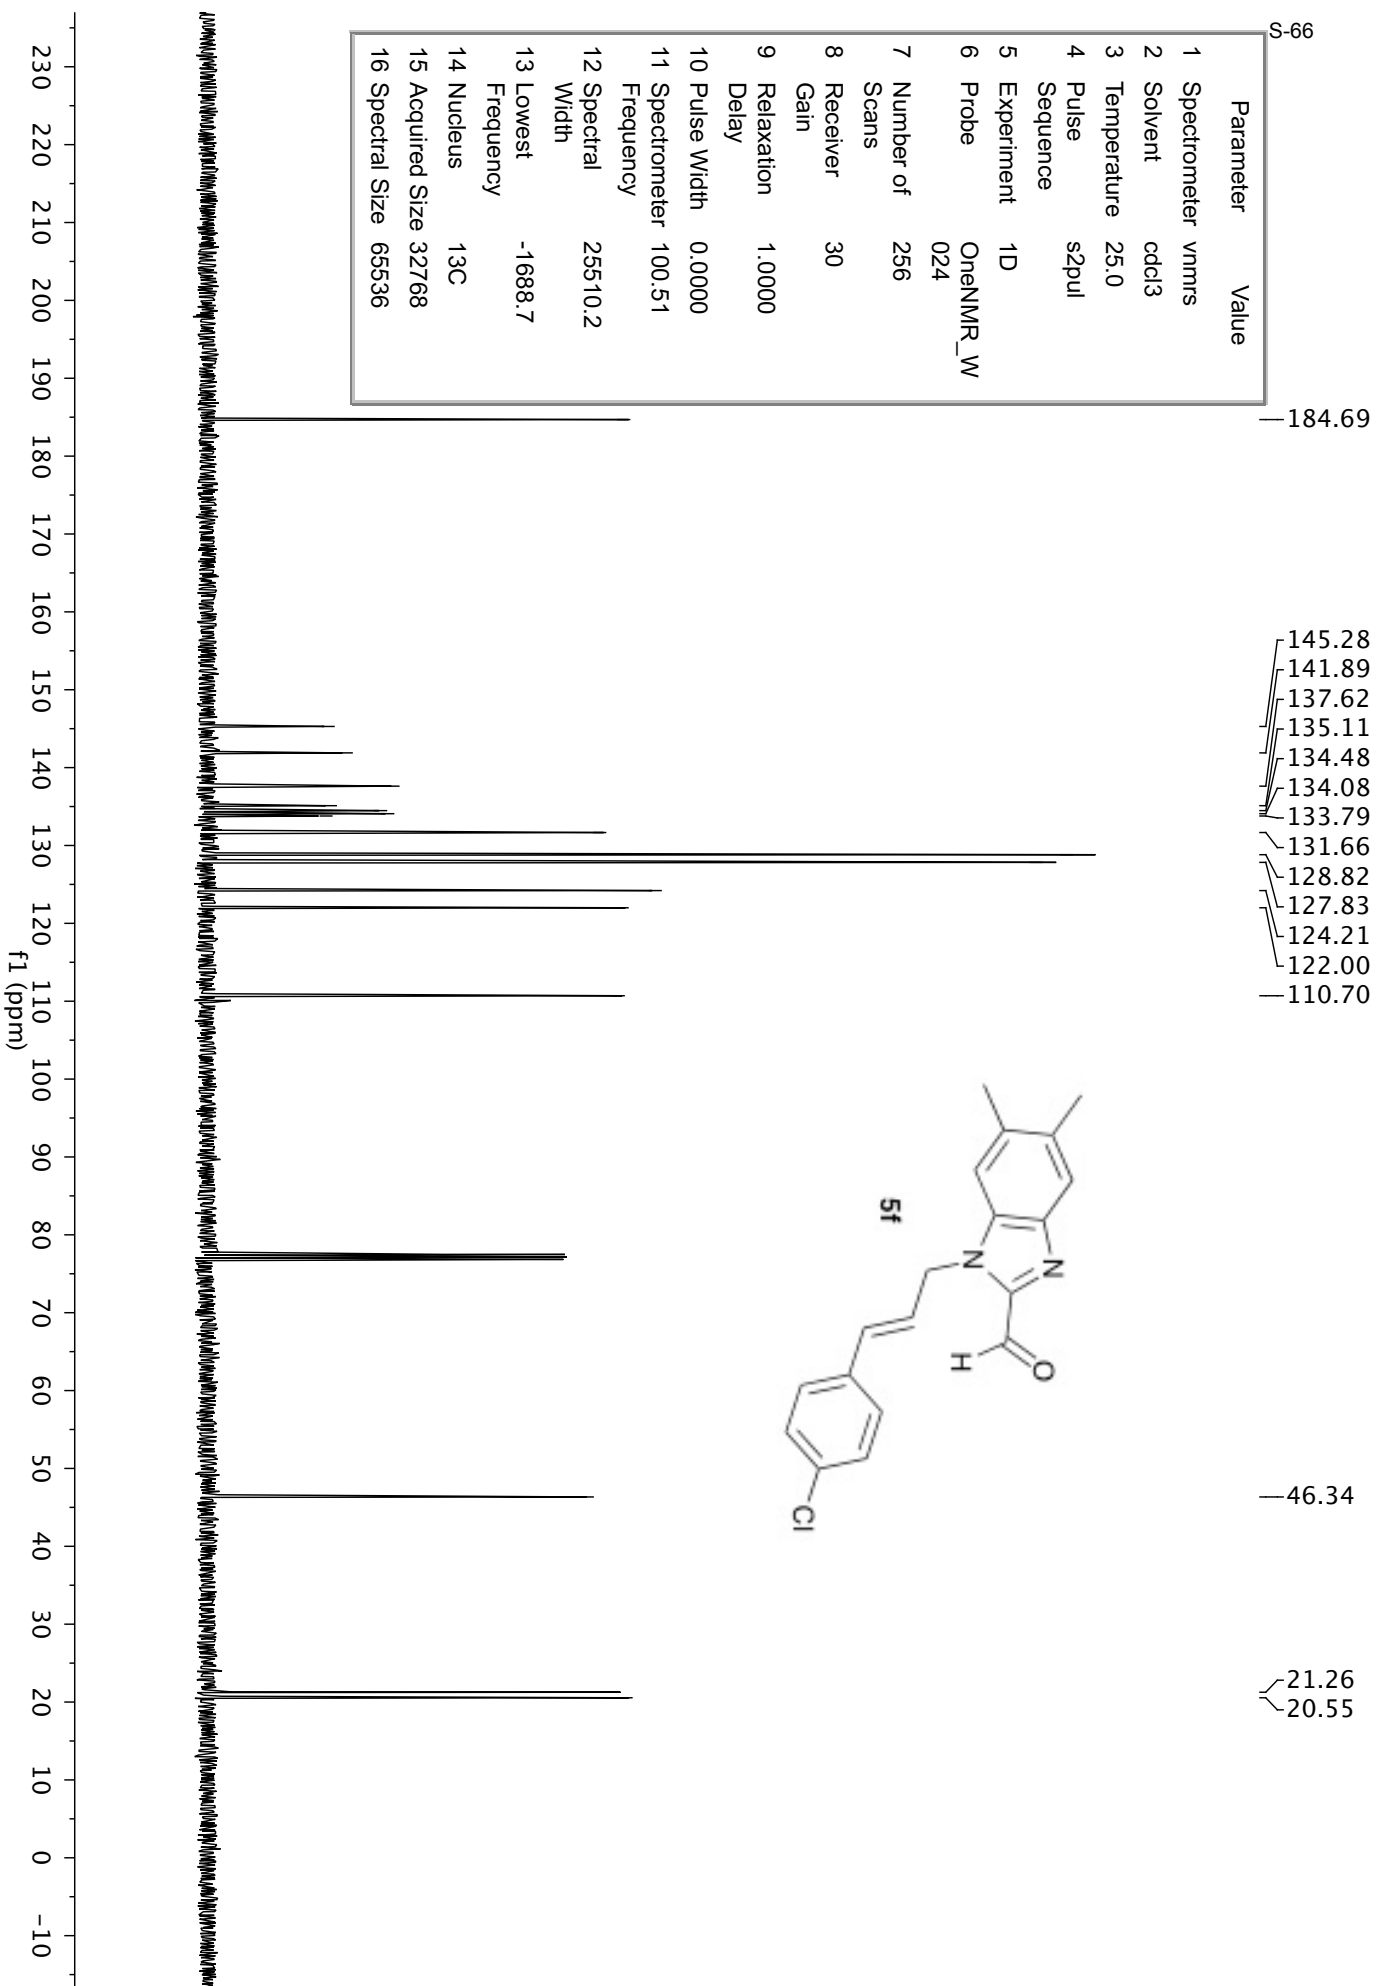

| Parameter                 | Value                                           |
|---------------------------|-------------------------------------------------|
| 1 Spectrometer            | spect                                           |
| 2 Solvent                 | CDCl3                                           |
| 3 Temperature             | 298.2                                           |
| 4 Pulse Sequence          | zg30                                            |
| 5 Experiment              | 1D                                              |
| 6 Probe                   | 5 mm PABBO BB/ 19F-1H/<br>D Z-GRD Z114607/ 0065 |
| 7 Number of Scans         | 16                                              |
| 8 Receiver Gain           | 128                                             |
| 9 Relaxation Delay        | 1.0000                                          |
| 10 Pulse Width            | 11.0000                                         |
| 11 Spectrometer Frequency | 600.39                                          |
| 12 Spectral Width         | 9615.4                                          |
| 13 Lowest Frequency       | -1226.4                                         |
| 14 Nucleus                | <sup>1</sup> H                                  |
| 15 Acquired Size          | 32768                                           |
| 16 Spectral Size          | 65536                                           |

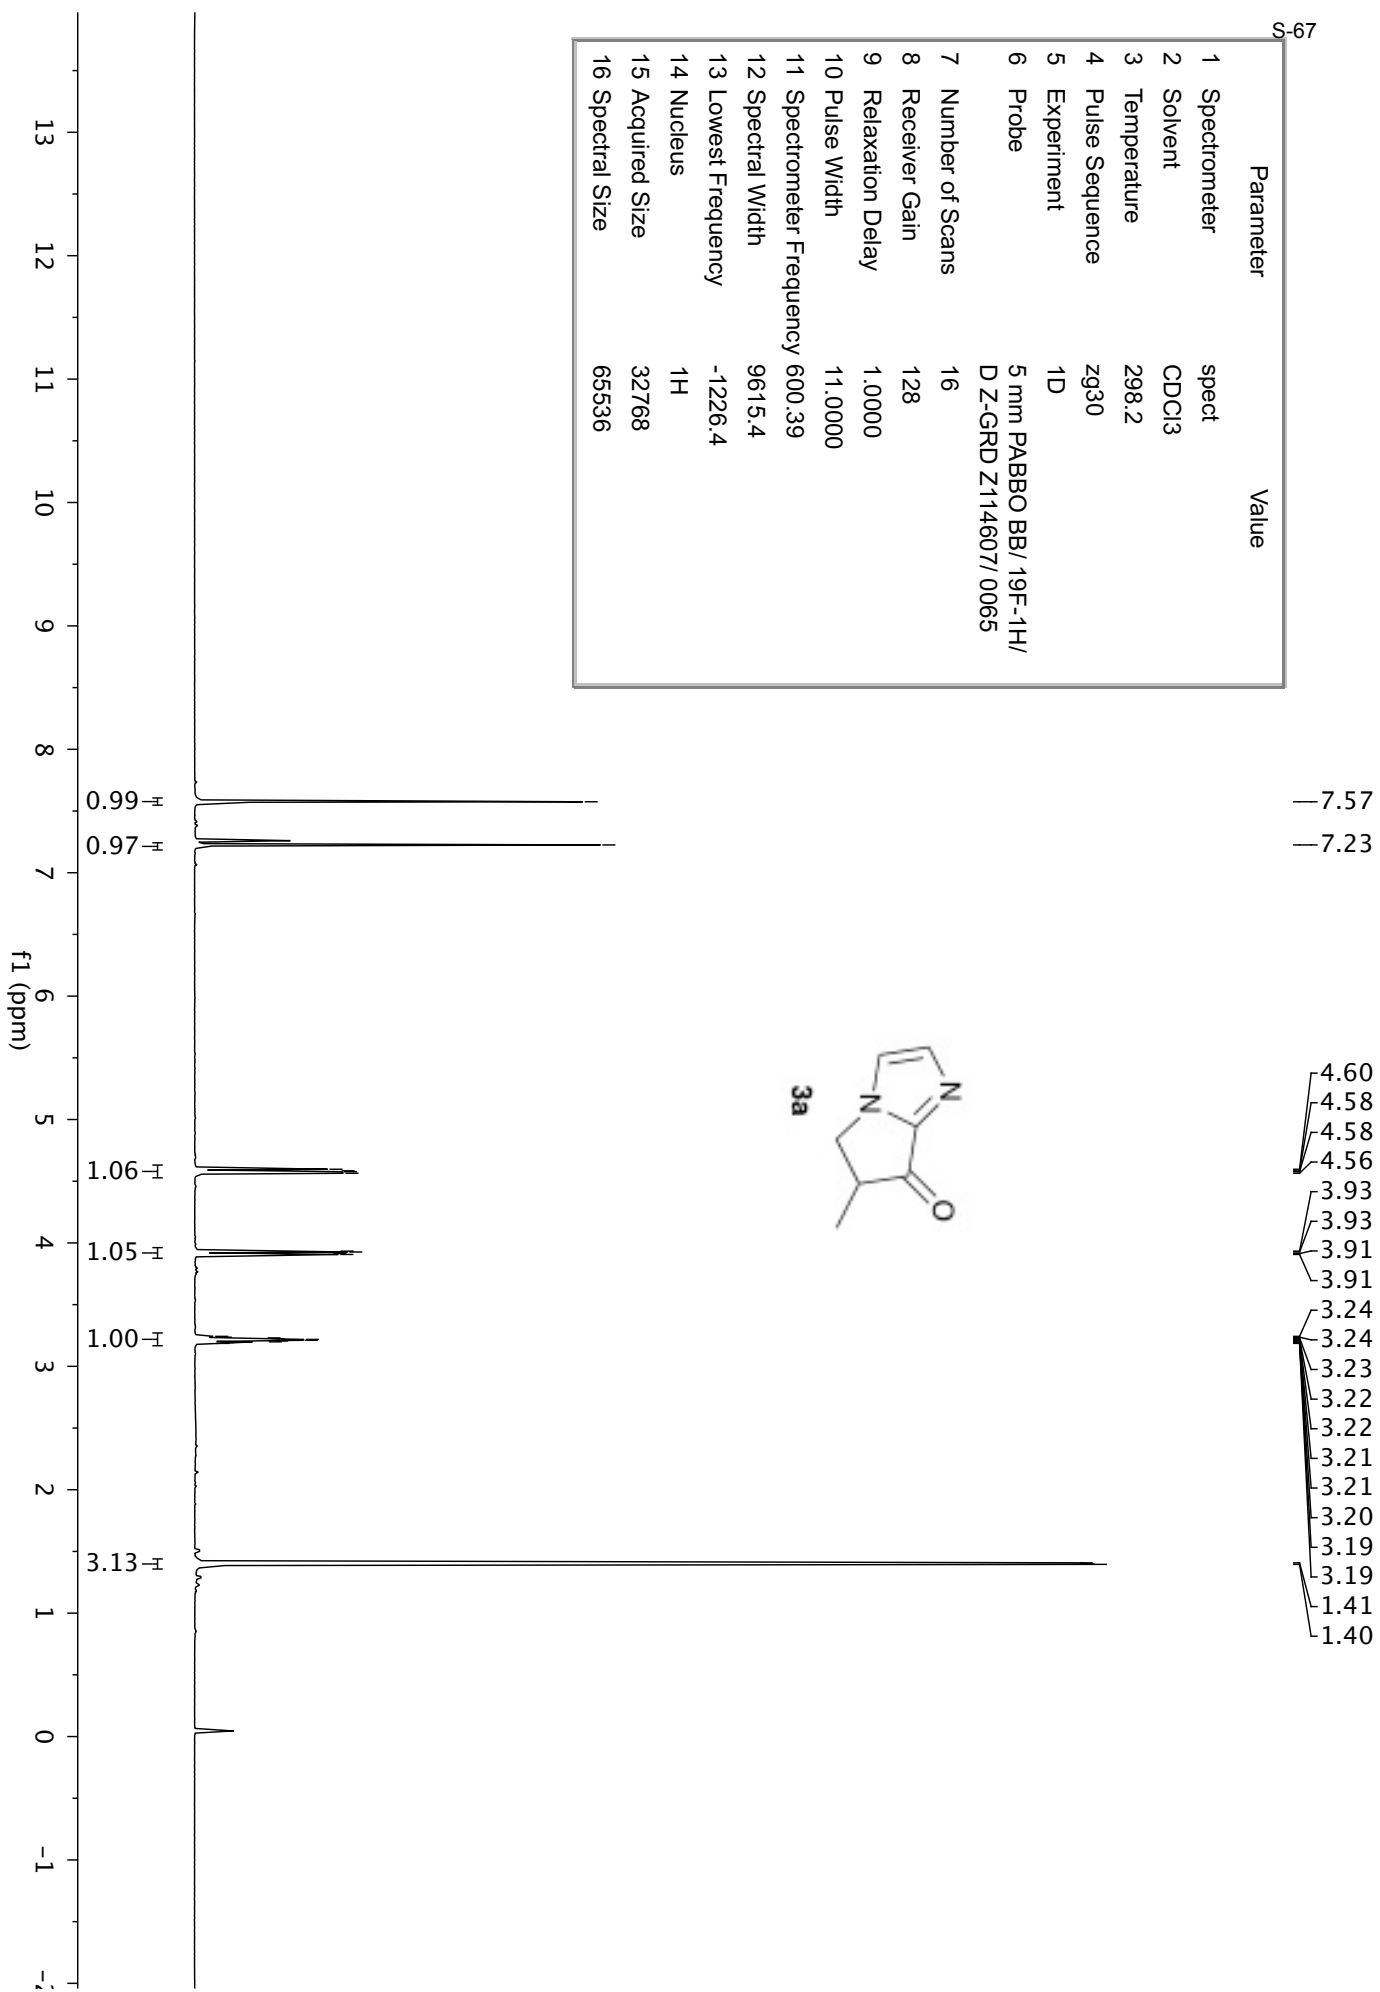

S-68  
— 190.27

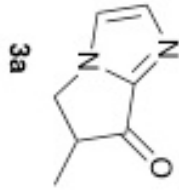

— 146.53

— 139.35

— 119.97

— 48.65

— 44.92

— 15.40

| Parameter                    | Value                                                       |
|------------------------------|-------------------------------------------------------------|
| 1 Spectrometer               | spect                                                       |
| 2 Solvent                    | CDCl3                                                       |
| 3 Temperature                | 298.2                                                       |
| 4 Pulse Sequence             | zgpg30                                                      |
| 5 Experiment                 | 1D                                                          |
| 6 Probe                      | 5 mm<br>PABBO BB/<br>19F-1H/ DZ-<br>GRD<br>Z114607/<br>0065 |
| 7 Number of Scans            | 158                                                         |
| 8 Receiver Gain              | 177                                                         |
| 9 Relaxation Delay           | 3.0000                                                      |
| 10 Pulse Width               | 11.6000                                                     |
| 11 Spectrometer<br>Frequency | 150.98                                                      |
| 12 Spectral Width            | 37878.8                                                     |
| 13 Lowest<br>Frequency       | -7604.2                                                     |
| 14 Nucleus                   | 13C                                                         |
| 15 Acquired Size             | 32768                                                       |
| 16 Spectral Size             | 65536                                                       |

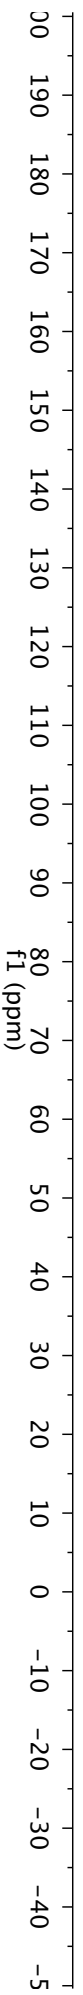

| Parameter                 | Value          |
|---------------------------|----------------|
| 1 Spectrometer            | vmrms          |
| 2 Solvent                 | cdcl3          |
| 3 Temperature             | 25.0           |
| 4 Pulse Sequence          | s2pul          |
| 5 Experiment              | 1D             |
| 6 Probe                   | OneNMR_W024    |
| 7 Number of Scans         | 8              |
| 8 Receiver Gain           | 30             |
| 9 Relaxation Delay        | 1.0000         |
| 10 Pulse Width            | 0.0000         |
| 11 Spectrometer Frequency | 399.69         |
| 12 Spectral Width         | 6410.3         |
| 13 Lowest Frequency       | -831.0         |
| 14 Nucleus                | <sup>1</sup> H |
| 15 Acquired Size          | 16384          |
| 16 Spectral Size          | 65536          |

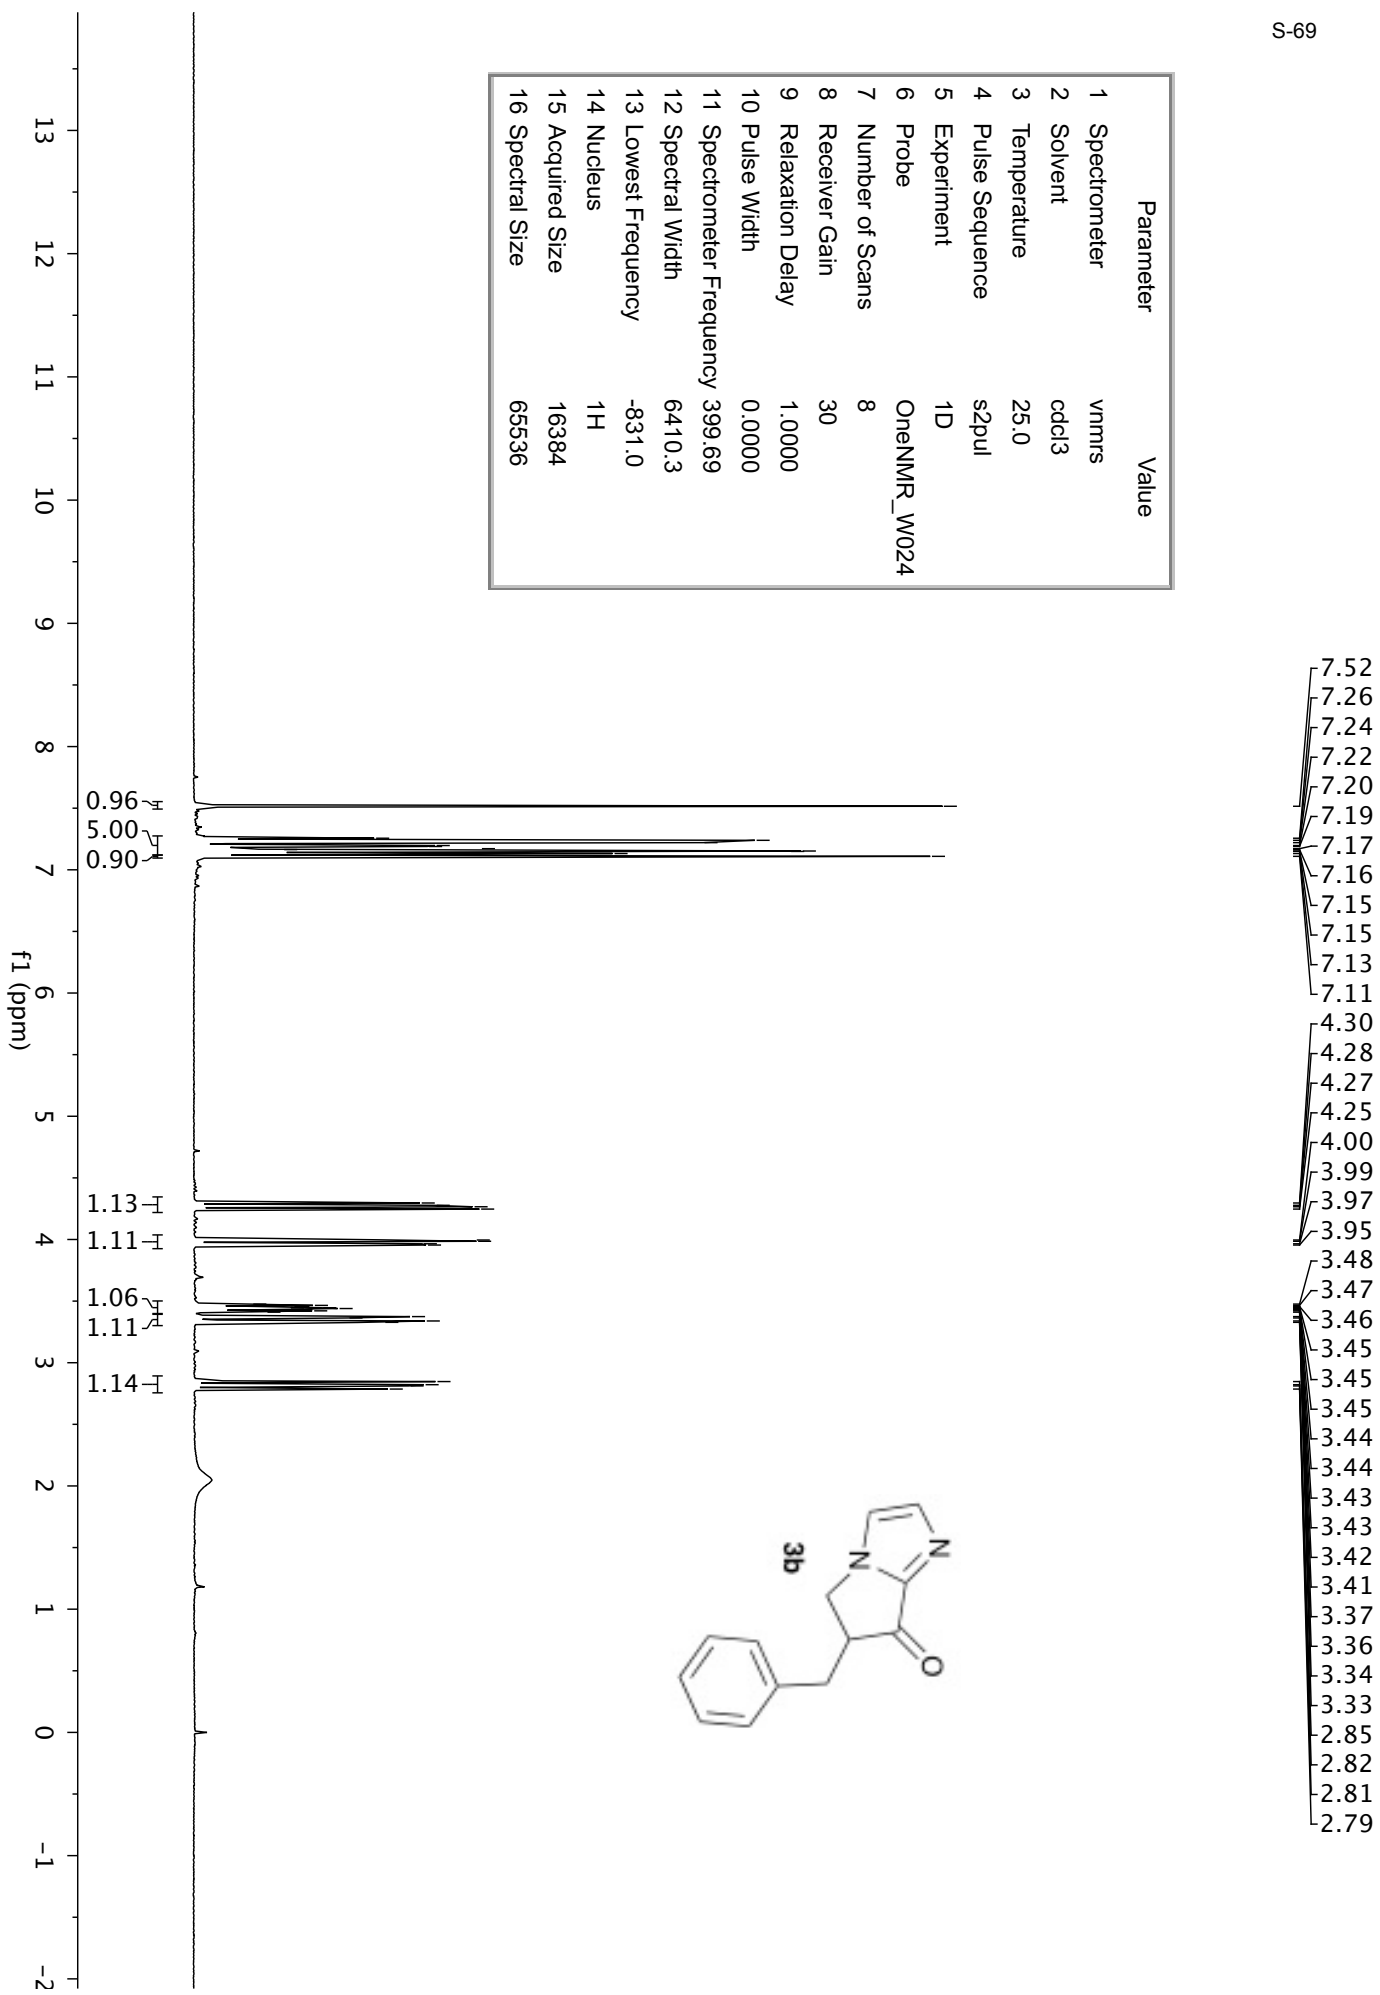

— 188.77

~ 146.68

~ 139.51

~ 137.70

~ 129.01

~ 128.85

~ 127.12

~ 120.17

— 51.51

— 46.14

— 36.12

| Parameter                 | Value           |
|---------------------------|-----------------|
| 1 Spectrometer            | vmrms           |
| 2 Solvent                 | cdcl3           |
| 3 Temperature             | 25.0            |
| 4 Pulse Sequence          | szpul           |
| 5 Experiment              | 1D              |
| 6 Probe                   | OneNMR_W024     |
| 7 Number of Scans         | 256             |
| 8 Receiver Gain           | 30              |
| 9 Relaxation Delay        | 1.0000          |
| 10 Pulse Width            | 0.0000          |
| 11 Spectrometer Frequency | 100.51          |
| 12 Spectral Width         | 25510.2         |
| 13 Lowest Frequency       | -1688.4         |
| 14 Nucleus                | <sup>13</sup> C |
| 15 Acquired Size          | 32768           |
| 16 Spectral Size          | 65536           |

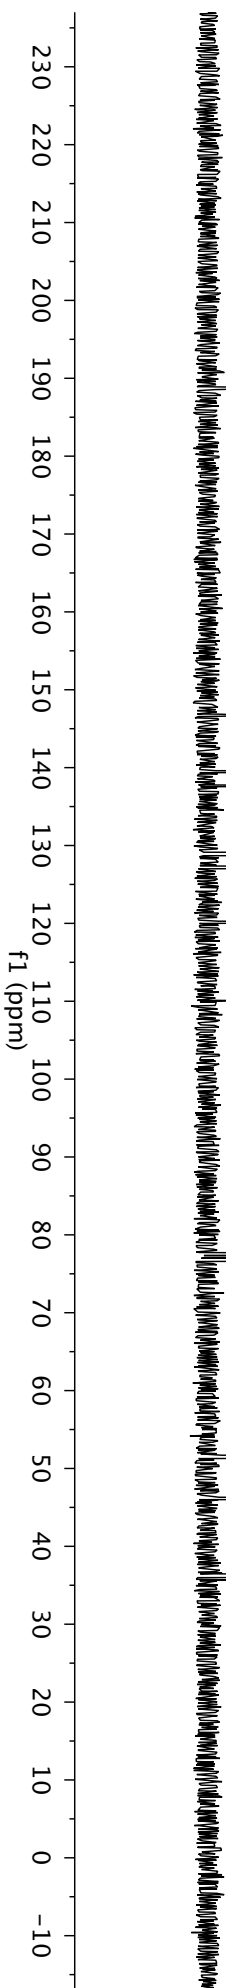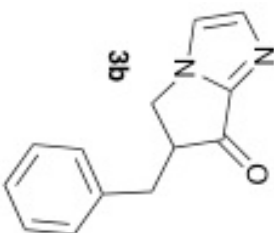

| Parameter                    | Value                                            |
|------------------------------|--------------------------------------------------|
| 1 Spectrometer               | spect                                            |
| 2 Solvent                    | CDCl3                                            |
| 3 Temperature                | 298.0                                            |
| 4 Pulse Sequence             | zg30                                             |
| 5 Experiment                 | 1D                                               |
| 6 Probe                      | 5 mm PABBO BB/<br>19F-1H/D Z-GRD<br>Z114607/0065 |
| 7 Number of Scans            | 16                                               |
| 8 Receiver Gain              | 88                                               |
| 9 Relaxation Delay           | 1.0000                                           |
| 10 Pulse Width               | 11.0000                                          |
| 11 Spectrometer<br>Frequency | 600.39                                           |
| 12 Spectral Width            | 9615.4                                           |
| 13 Lowest Frequency          | -1226.4                                          |
| 14 Nucleus                   | <sup>1</sup> H                                   |
| 15 Acquired Size             | 32768                                            |
| 16 Spectral Size             | 65536                                            |

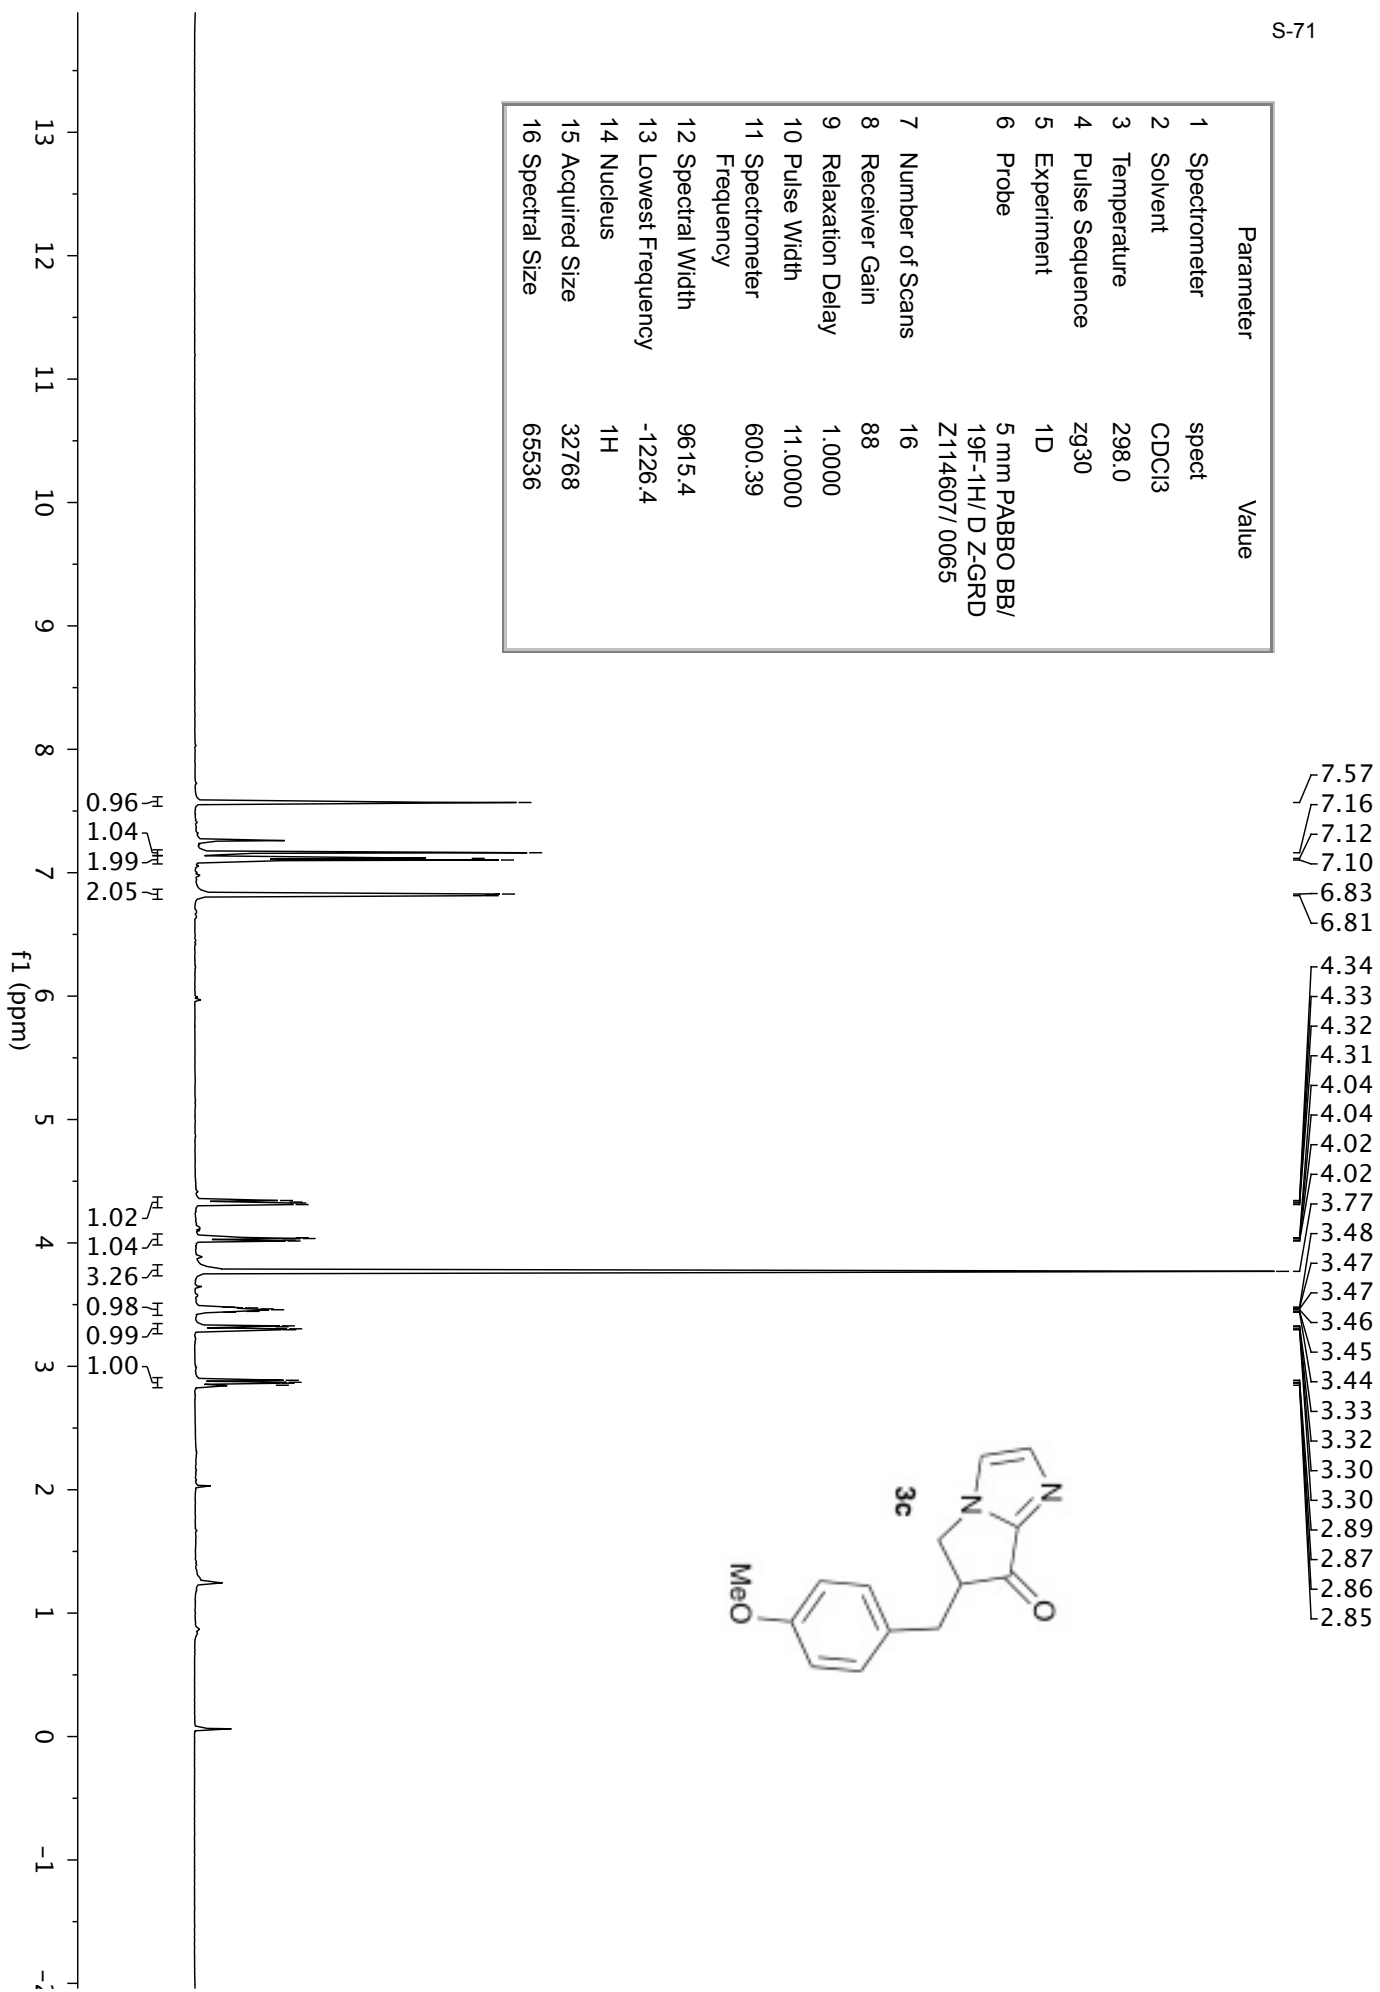

S-72

— 188.91

— 158.70

— 146.81

— 139.46

— 129.92

— 129.53

— 120.13

— 114.38

— 55.38

— 51.69

— 46.01

— 35.23

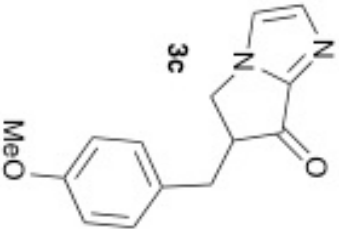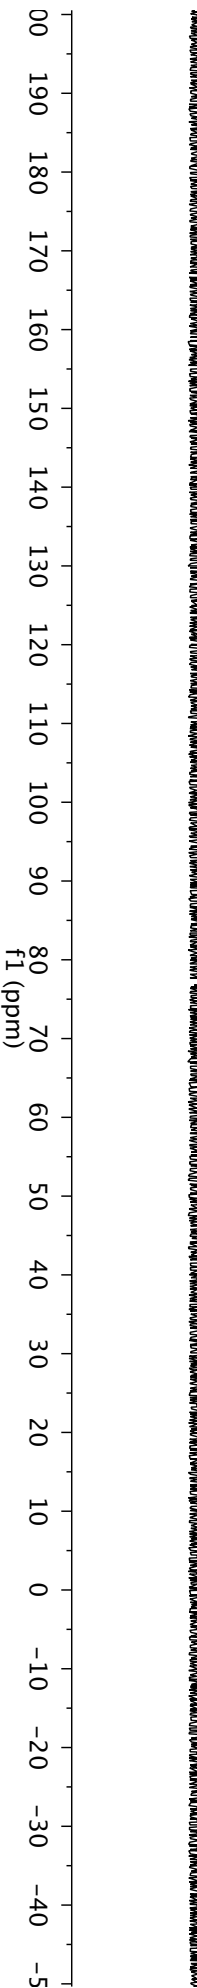

| Parameter                    | Value                                                |
|------------------------------|------------------------------------------------------|
| 1 Spectrometer               | spect                                                |
| 2 Solvent                    | CDCI3                                                |
| 3 Temperature                | 298.0                                                |
| 4 Pulse Sequence             | zgpg30                                               |
| 5 Experiment                 | 1D                                                   |
| 6 Probe                      | 5 mm PABBO<br>BB/19F-1H/D-Z-<br>GRD Z114607/<br>0065 |
| 7 Number of Scans            | 708                                                  |
| 8 Receiver Gain              | 177                                                  |
| 9 Relaxation Delay           | 3.0000                                               |
| 10 Pulse Width               | 11.6000                                              |
| 11 Spectrometer<br>Frequency | 150.98                                               |
| 12 Spectral Width            | 37878.8                                              |
| 13 Lowest Frequency          | -7602.0                                              |
| 14 Nucleus                   | 13C                                                  |
| 15 Acquired Size             | 32768                                                |
| 16 Spectral Size             | 65536                                                |



| Parameter                 | Value                                             |
|---------------------------|---------------------------------------------------|
| 1 Spectrometer            | spect                                             |
| 2 Solvent                 | CDCl3                                             |
| 3 Temperature             | 298.0                                             |
| 4 Pulse Sequence          | zg30                                              |
| 5 Experiment              | 1D                                                |
| 6 Probe                   | 5 mm PABBO BB/<br>19F-1H/ D Z-GRD<br>Z114607/0065 |
| 7 Number of Scans         | 16                                                |
| 8 Receiver Gain           | 61                                                |
| 9 Relaxation Delay        | 1.0000                                            |
| 10 Pulse Width            | 11.0000                                           |
| 11 Spectrometer Frequency | 600.39                                            |
| 12 Spectral Width         | 9615.4                                            |
| 13 Lowest Frequency       | -1225.8                                           |
| 14 Nucleus                | <sup>1</sup> H                                    |
| 15 Acquired Size          | 32768                                             |
| 16 Spectral Size          | 65536                                             |

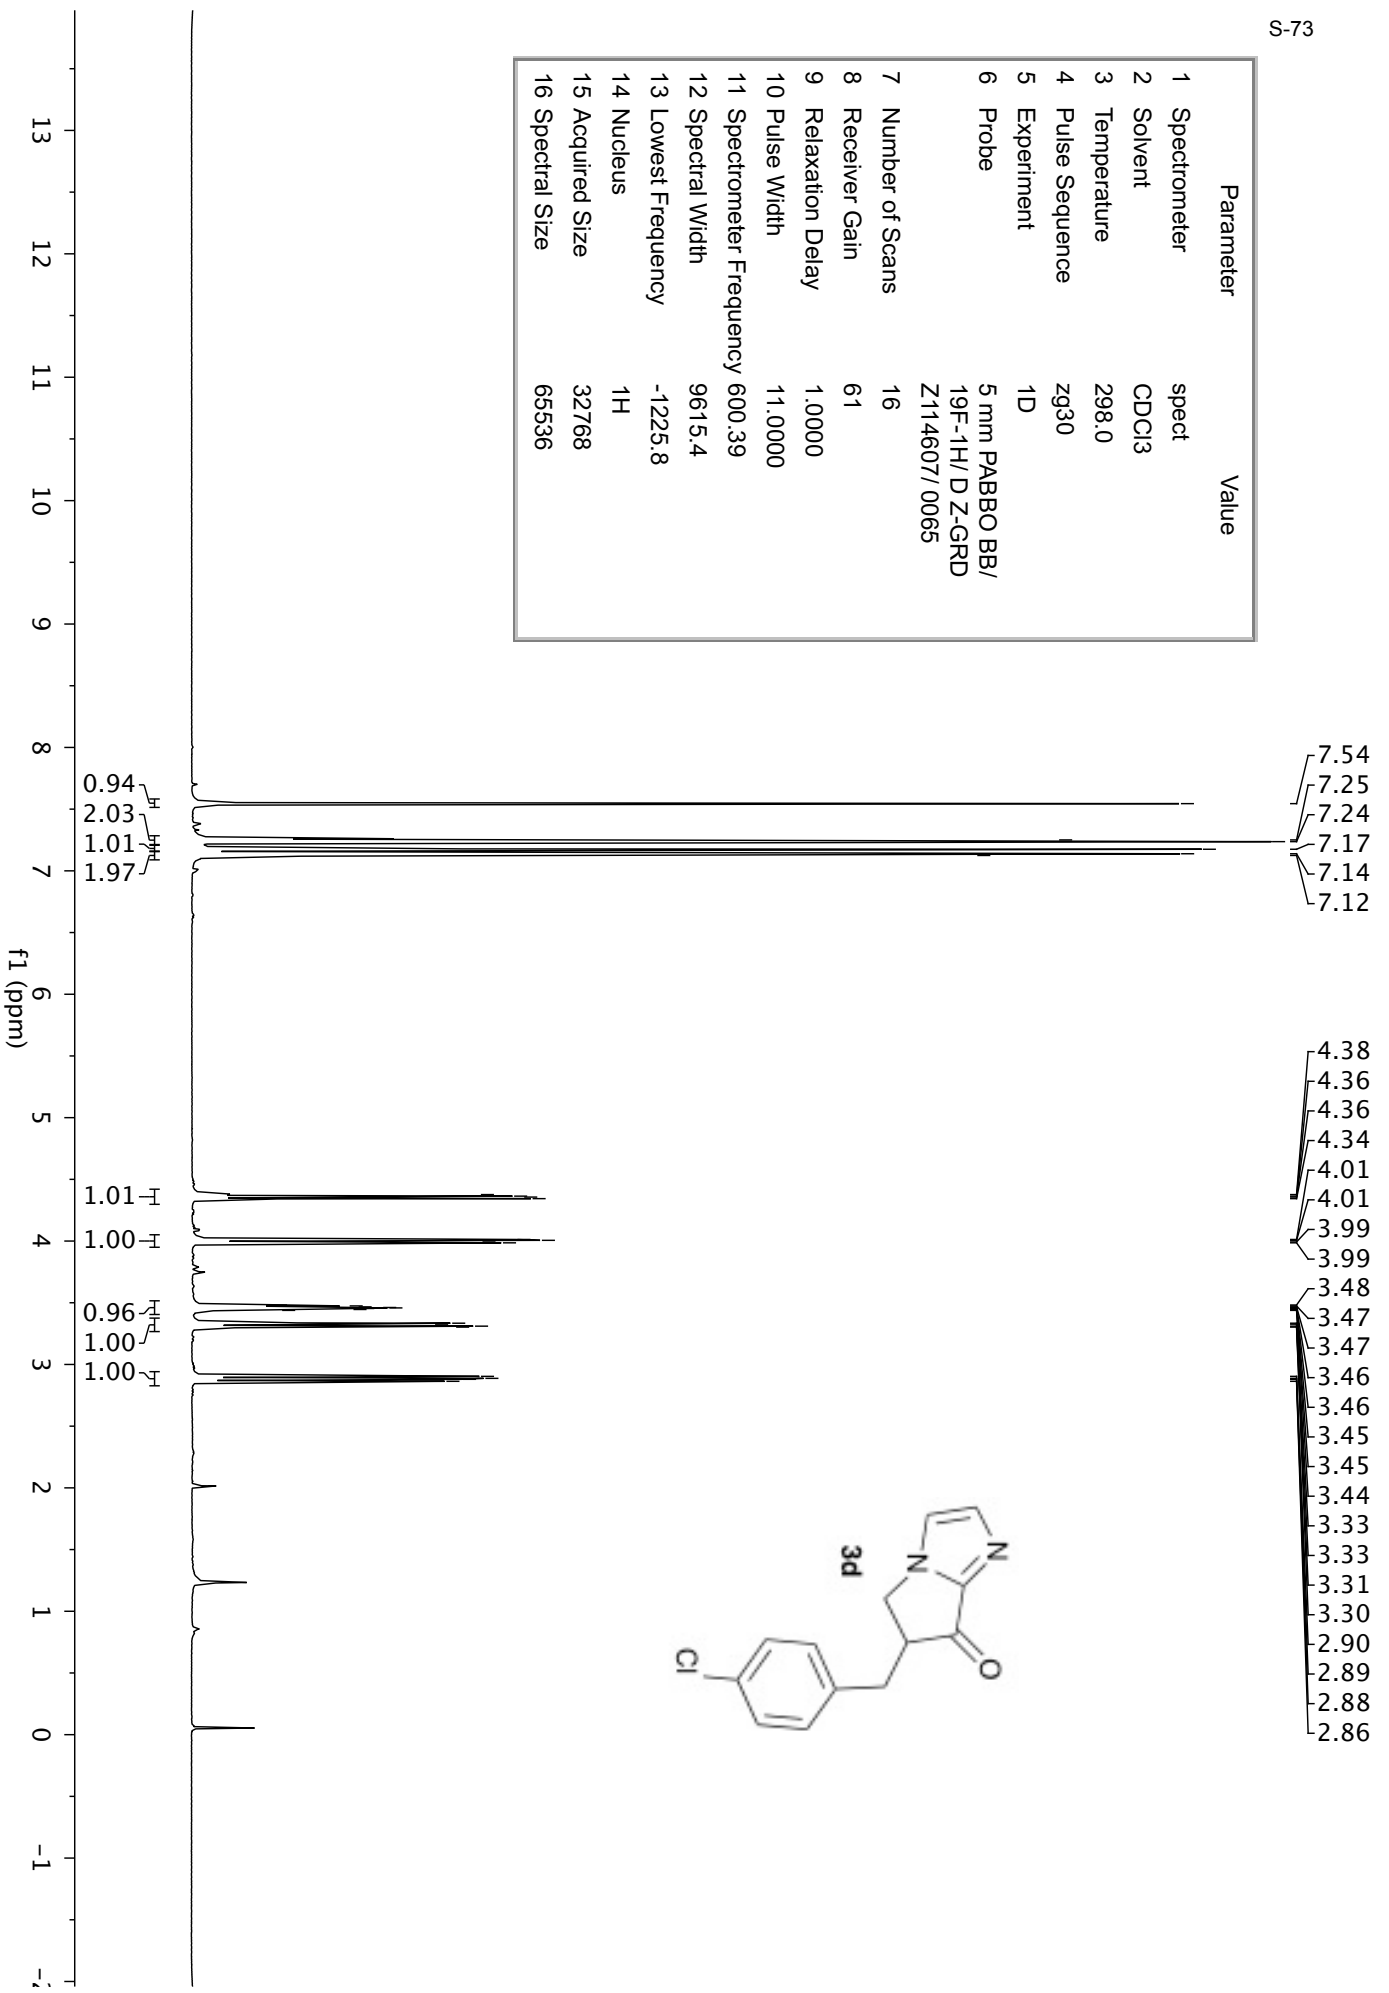

S-74

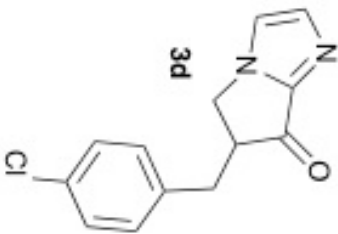

— 188.40

~ 146.54  
 ~ 139.52  
 ~ 136.12  
 ~ 132.94  
 ~ 130.24  
 ~ 129.08

— 120.27

— 51.21

— 45.96

— 35.31

| Parameter                    | Value                                                  |
|------------------------------|--------------------------------------------------------|
| 1 Spectrometer               | spect                                                  |
| 2 Solvent                    | CDCl3                                                  |
| 3 Temperature                | 298.0                                                  |
| 4 Pulse Sequence             | zgpg30                                                 |
| 5 Experiment                 | 1D                                                     |
| 6 Probe                      | 5 mm PABBO<br>BB/19F-1H/<br>DZ-GRD<br>Z114607/<br>0065 |
| 7 Number of Scans            | 266                                                    |
| 8 Receiver Gain              | 177                                                    |
| 9 Relaxation Delay           | 3.0000                                                 |
| 10 Pulse Width               | 11.6000                                                |
| 11 Spectrometer<br>Frequency | 150.98                                                 |
| 12 Spectral Width            | 37878.8                                                |
| 13 Lowest<br>Frequency       | -7608.2                                                |
| 14 Nucleus                   | <sup>13</sup> C                                        |
| 15 Acquired Size             | 32768                                                  |
| 16 Spectral Size             | 65536                                                  |

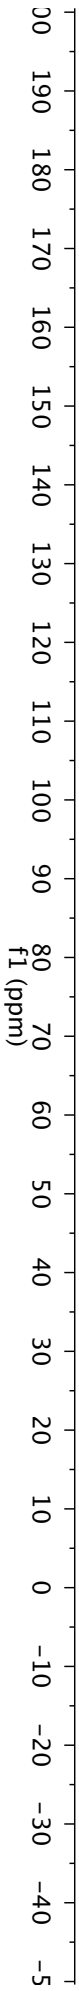

| Parameter                    | Value                                            |
|------------------------------|--------------------------------------------------|
| 1 Spectrometer               | spect                                            |
| 2 Solvent                    | CDCl3                                            |
| 3 Temperature                | 298.0                                            |
| 4 Pulse Sequence             | zg30                                             |
| 5 Experiment                 | 1D                                               |
| 6 Probe                      | 5 mm PABBO BB/<br>19F-1H/D-Z-GRD<br>Z114607/0065 |
| 7 Number of Scans            | 16                                               |
| 8 Receiver Gain              | 128                                              |
| 9 Relaxation Delay           | 1.0000                                           |
| 10 Pulse Width               | 11.0000                                          |
| 11 Spectrometer<br>Frequency | 600.39                                           |
| 12 Spectral Width            | 9615.4                                           |
| 13 Lowest Frequency          | -1217.4                                          |
| 14 Nucleus                   | <sup>1</sup> H                                   |
| 15 Acquired Size             | 32768                                            |
| 16 Spectral Size             | 65536                                            |

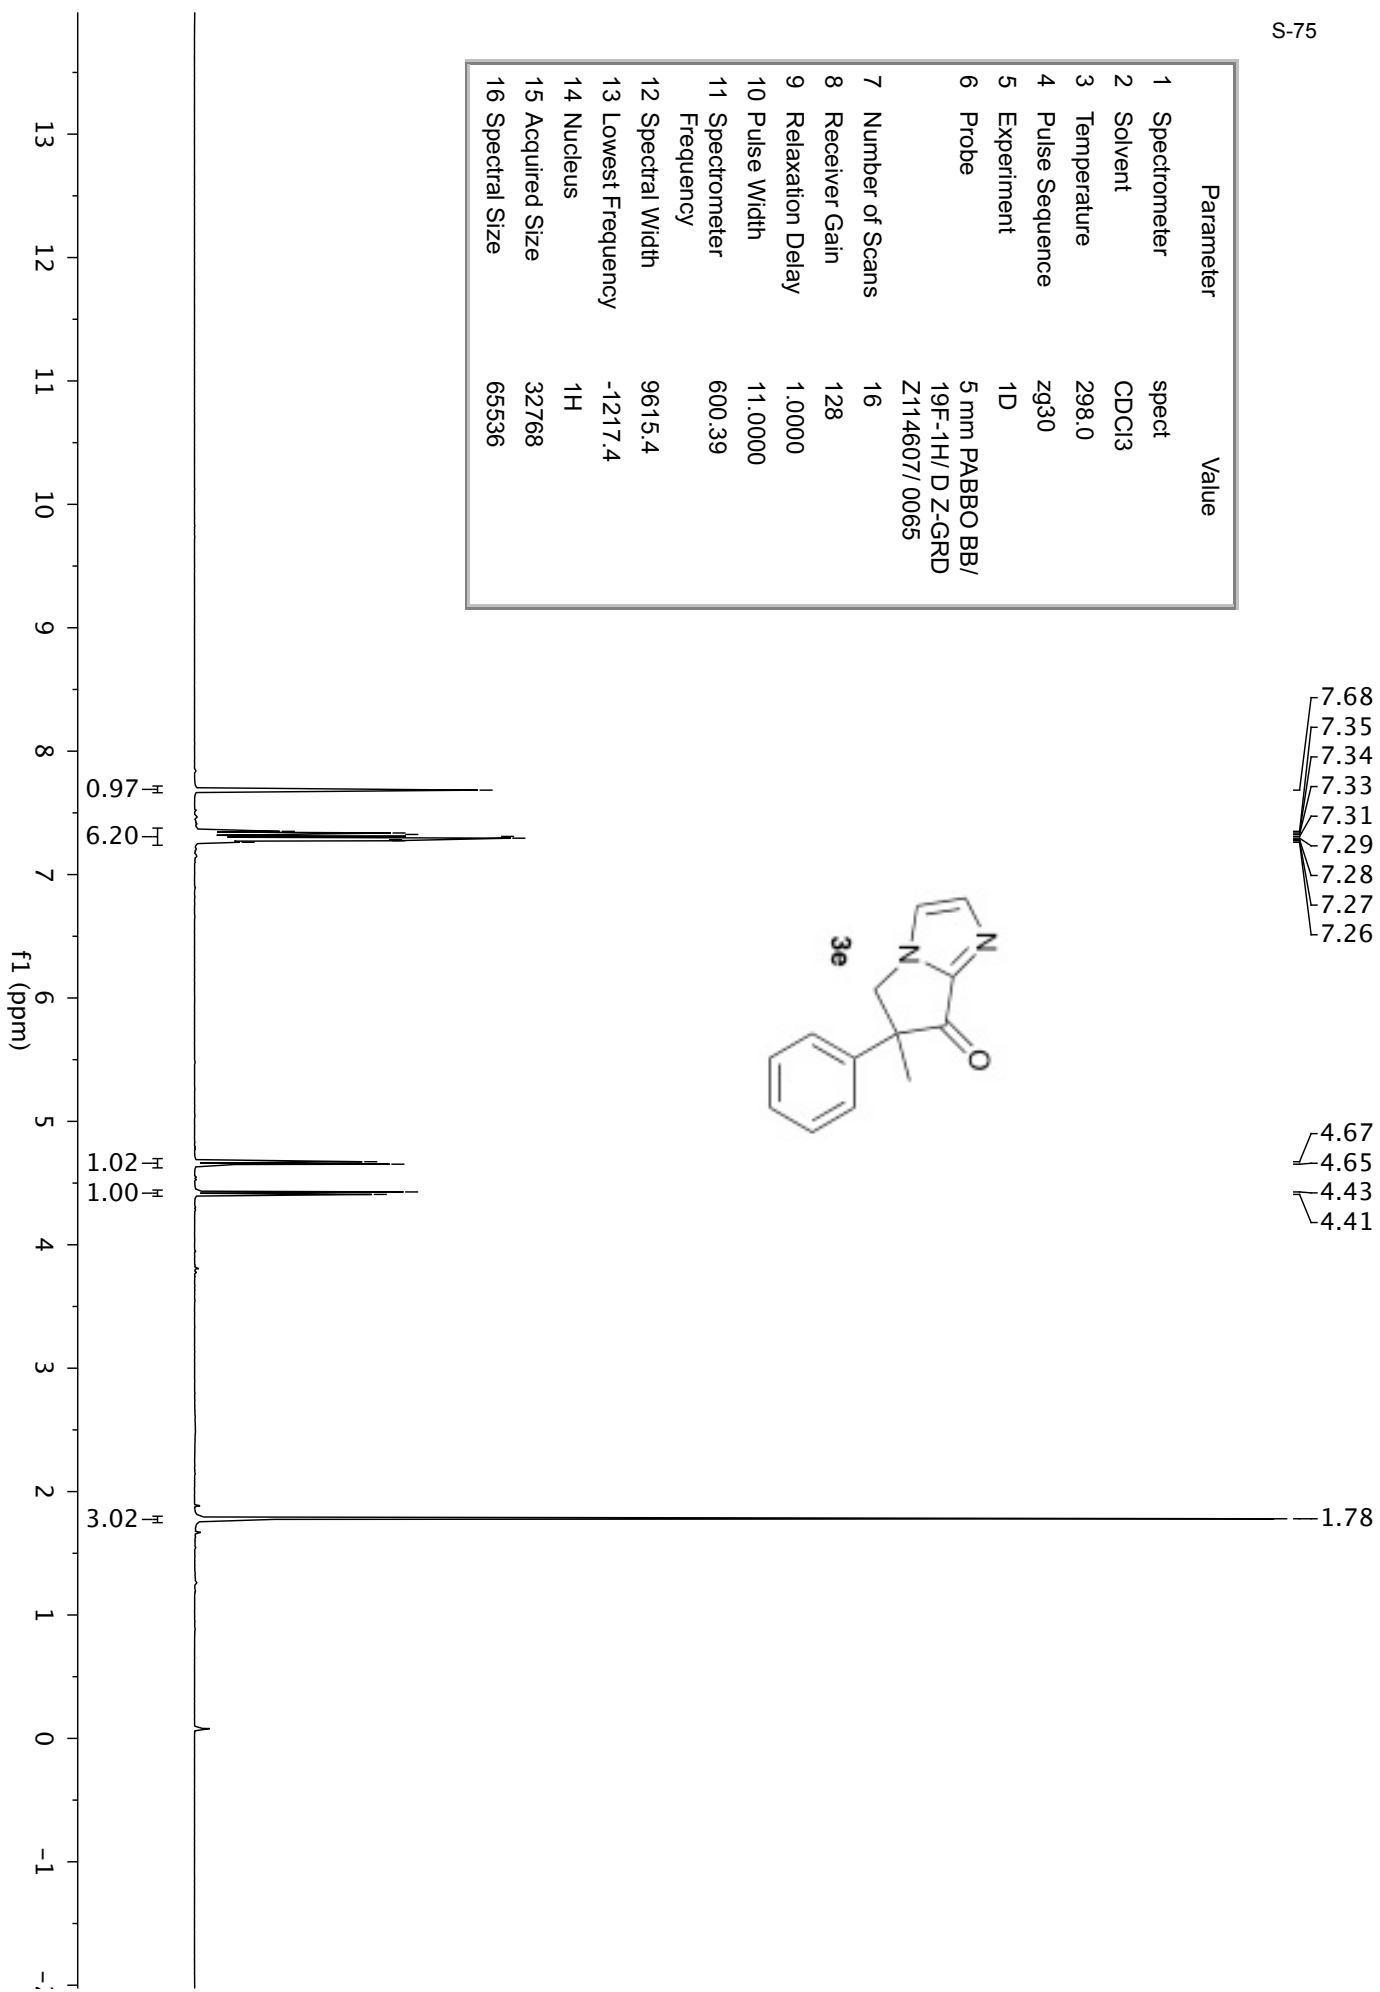

— 190.35

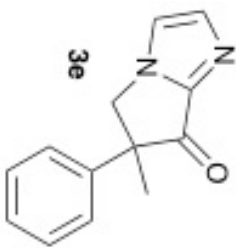

145.95  
141.27  
139.93

129.10  
127.73  
125.92  
120.21

57.19  
56.66

— 23.66

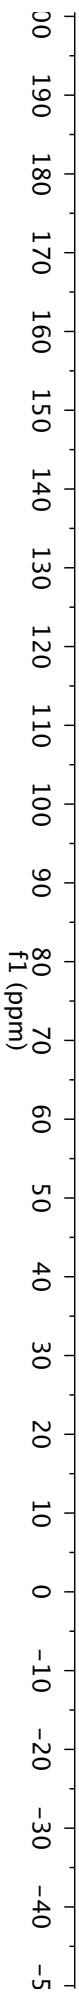

| Parameter                    | Value                                              |
|------------------------------|----------------------------------------------------|
| 1 Spectrometer               | spect                                              |
| 2 Solvent                    | CDCl3                                              |
| 3 Temperature                | 298.0                                              |
| 4 Pulse Sequence             | zgpg30                                             |
| 5 Experiment                 | 1D                                                 |
| 6 Probe                      | 5 mm PABBO<br>BB/19F-1H/D<br>Z-GRD<br>Z114607/0065 |
| 7 Number of Scans            | 200                                                |
| 8 Receiver Gain              | 177                                                |
| 9 Relaxation Delay           | 3.0000                                             |
| 10 Pulse Width               | 11.6000                                            |
| 11 Spectrometer<br>Frequency | 150.98                                             |
| 12 Spectral Width            | 37878.8                                            |
| 13 Lowest Frequency          | -7604.6                                            |
| 14 Nucleus                   | <sup>13</sup> C                                    |
| 15 Acquired Size             | 32768                                              |
| 16 Spectral Size             | 65536                                              |

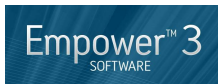

## Injection Summary Report

### SAMPLE INFORMATION

|                   |                           |                     |                        |
|-------------------|---------------------------|---------------------|------------------------|
| Sample Name:      | JWN_1a_ADH90_10_1mpm      | Acquired By:        | System                 |
| Sample Type:      | Unknown                   | Sample Set Name     | James_ChemComm_racemic |
| Vial:             | 63                        | Acq. Method Set:    | 1_ADH 90_10 1mpm       |
| Injection #:      | 1                         | Processing Method   |                        |
| Injection Volume: | 10.00 ul                  | Channel Name:       | W2489 ChA              |
| Run Time:         | 60.0 Minutes              | Proc. Chnl. Descr.: | W2489 ChA 254nm        |
|                   |                           |                     |                        |
| Date Acquired:    | 7/27/2016 6:48:54 PM CDT  |                     |                        |
| Date Processed:   | 8/15/2016 11:13:54 PM CDT |                     |                        |

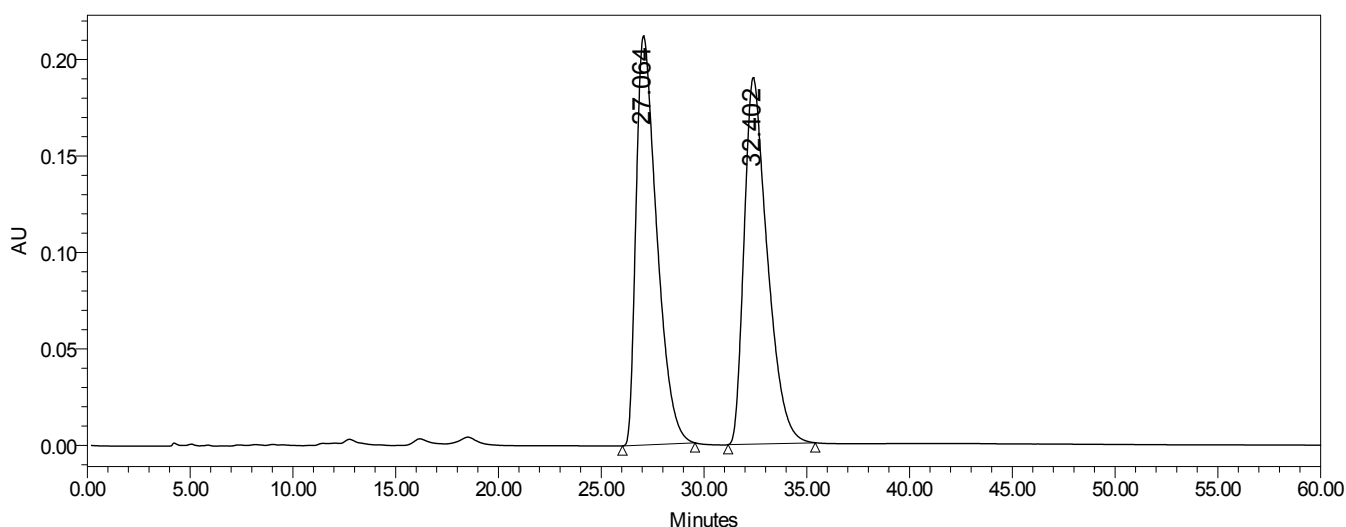

Channel: W2489 ChA; Processed Channel: W2489 ChA 254nm; Result Id: 21667; Processing Method: jwn4\_1a\_ADH\_90\_10\_1\_mpm\_254nm

#### Processed Channel Descr.: W2489 ChA 254nm

|   | Processed Channel Descr. | RT     | Area     | % Area | Height |
|---|--------------------------|--------|----------|--------|--------|
| 1 | W2489 ChA 254nm          | 27.064 | 14821276 | 49.87  | 212100 |
| 2 | W2489 ChA 254nm          | 32.402 | 14899260 | 50.13  | 190013 |

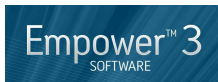

## Injection Summary Report

### SAMPLE INFORMATION

|                                           |                     |                    |
|-------------------------------------------|---------------------|--------------------|
| Sample Name:                              | Acquired By:        | System             |
| Sample Type: Unknown                      | Sample Set Name:    | jwn4_75_asymmetric |
| Vial: 3                                   | Acq. Method Set:    | 1_ADH 90_10 1mpm   |
| Injection #: 1                            | Processing Method:  | jwn4_1A_254nm      |
| Injection Volume: 10.00 ul                | Channel Name:       | W2489 ChA          |
| Run Time: 60.0 Minutes                    | Proc. Chnl. Descr.: | W2489 ChA 254nm    |
| Date Acquired: 8/8/2016 8:48:15 PM CDT    |                     |                    |
| Date Processed: 8/15/2016 11:15:43 PM CDT |                     |                    |

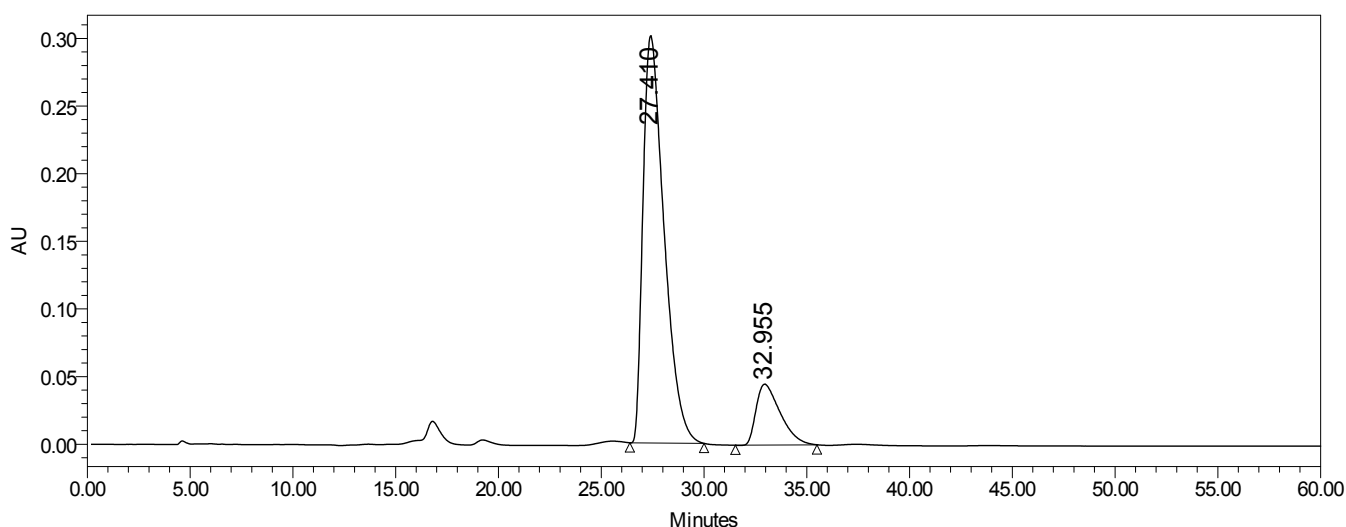

Channel: W2489 ChA; Processed Channel: W2489 ChA 254nm; Result Id: 21669; Processing Method: jwn4\_1A\_254nm

#### Processed Channel Descr.: W2489 ChA 254nm

|   | Processed Channel Descr. | RT     | Area     | % Area | Height |
|---|--------------------------|--------|----------|--------|--------|
| 1 | W2489 ChA 254nm          | 27.410 | 21458893 | 85.39  | 301014 |
| 2 | W2489 ChA 254nm          | 32.955 | 3672257  | 14.61  | 45039  |

| Parameter                    | Value                                            |
|------------------------------|--------------------------------------------------|
| 1 Spectrometer               | spect                                            |
| 2 Solvent                    | CDCl <sub>3</sub>                                |
| 3 Temperature                | 308.0                                            |
| 4 Pulse Sequence             | zg30                                             |
| 5 Experiment                 | 1D                                               |
| 6 Probe                      | 5 mm PABBO BB/<br>19F-1H/D-Z-GRD<br>Z114607/0065 |
| 7 Number of Scans            | 16                                               |
| 8 Receiver Gain              | 75                                               |
| 9 Relaxation Delay           | 1.0000                                           |
| 10 Pulse Width               | 11.0000                                          |
| 11 Spectrometer<br>Frequency | 600.39                                           |
| 12 Spectral Width            | 9615.4                                           |
| 13 Lowest Frequency          | -1225.8                                          |
| 14 Nucleus                   | <sup>1</sup> H                                   |
| 15 Acquired Size             | 32768                                            |
| 16 Spectral Size             | 65536                                            |

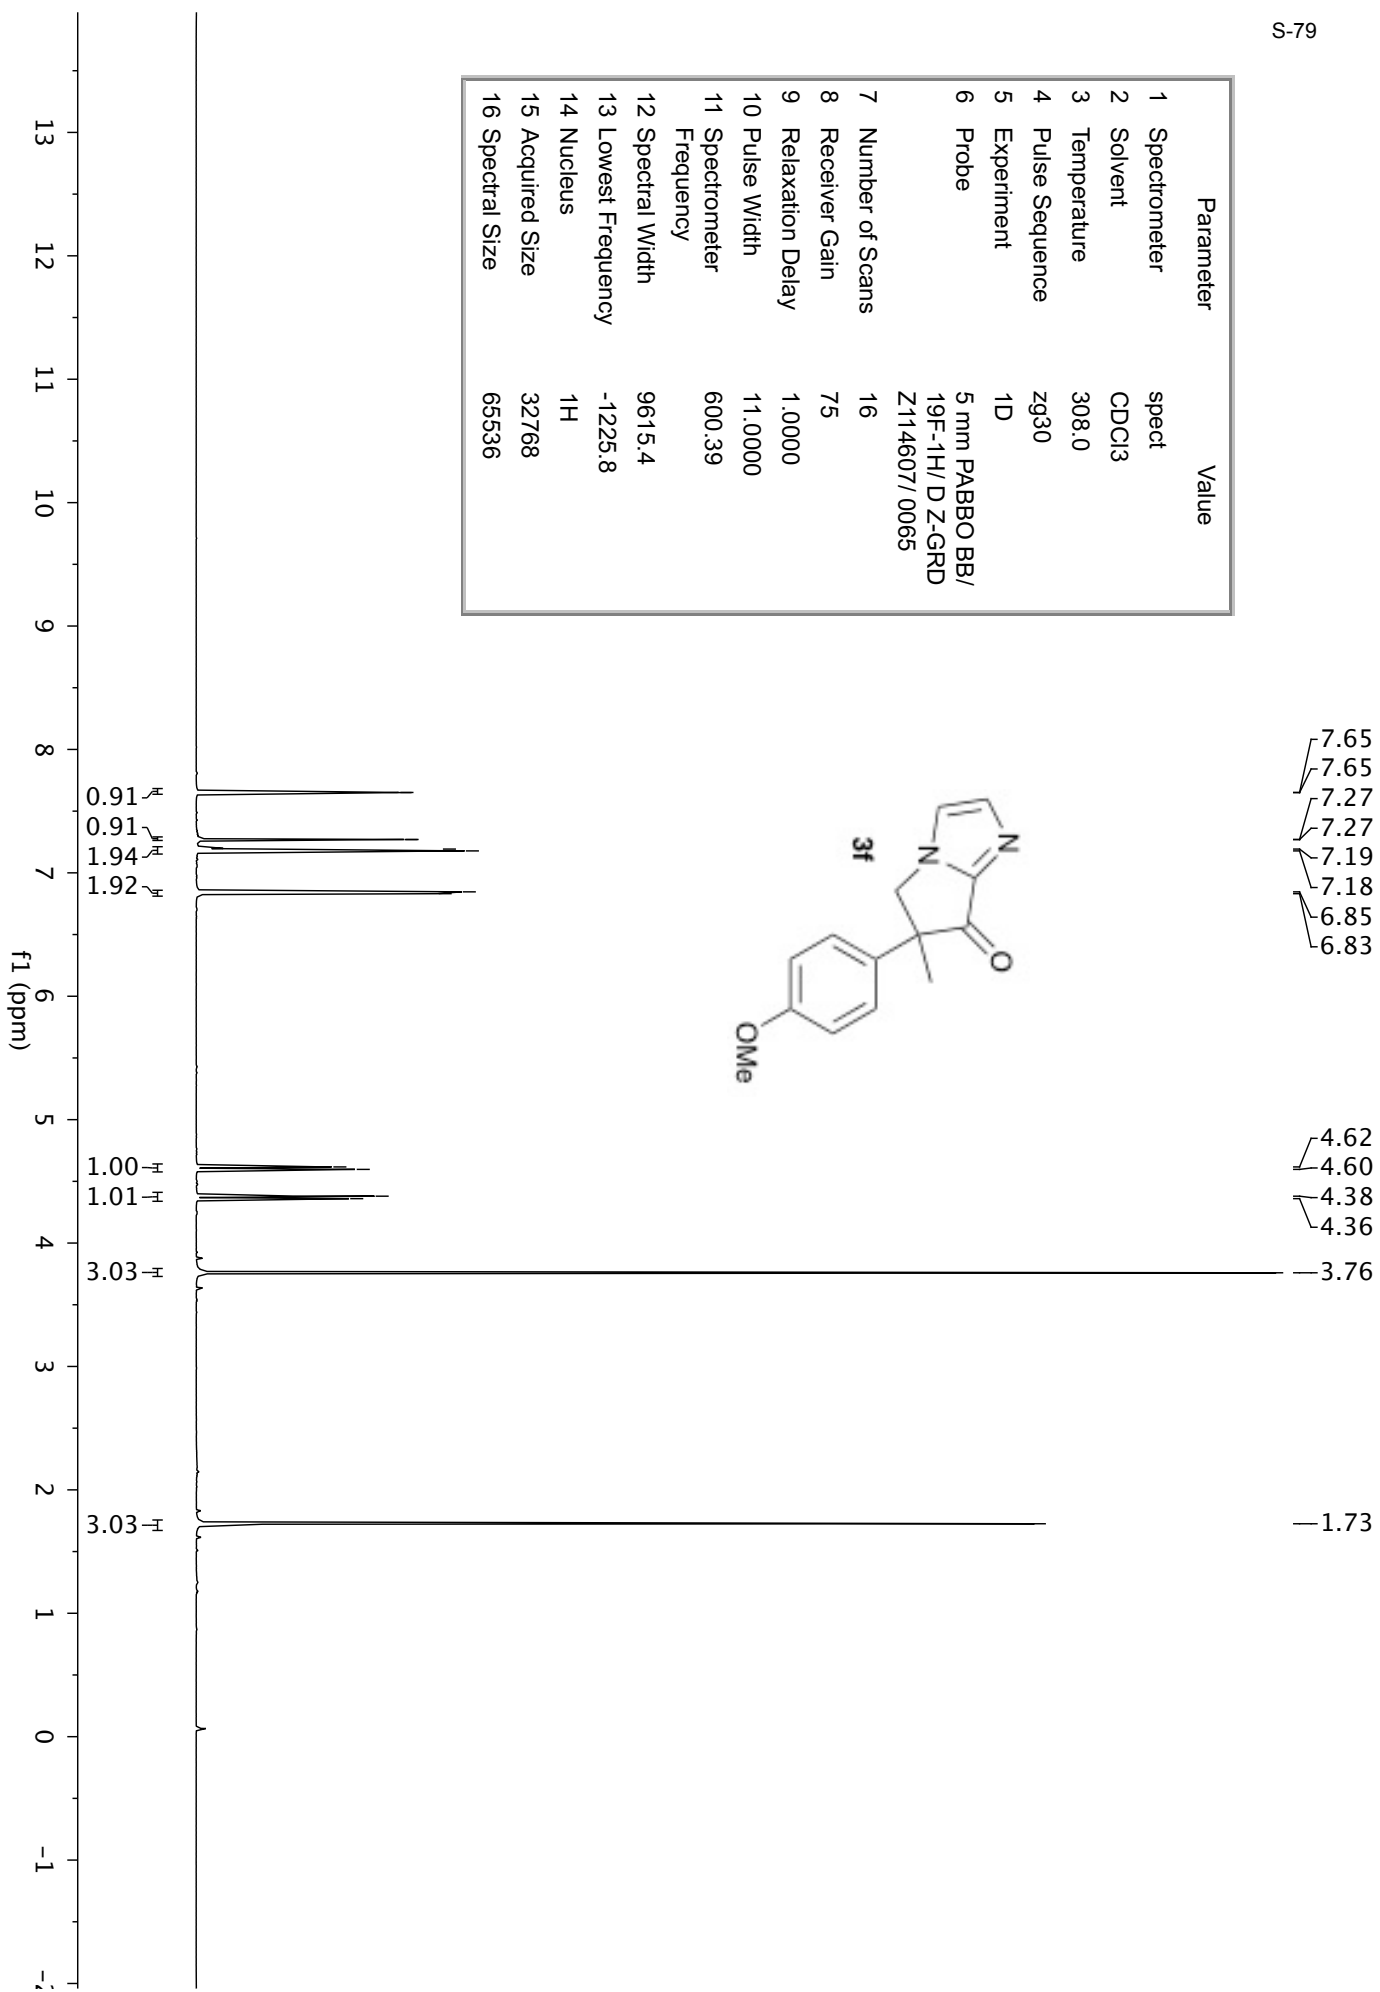

S-80

— 190.60

— 159.06

146.03

139.84

133.33

127.09

120.09

114.48

57.20

56.12

55.42

— 23.82

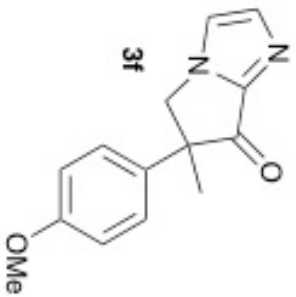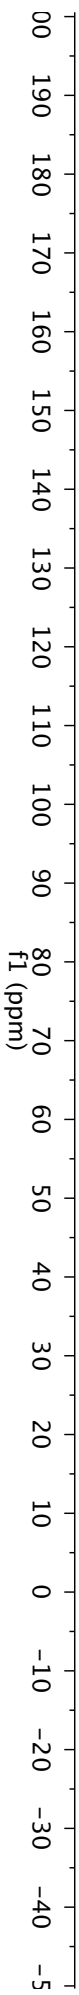

| Parameter                    | Value                                               |
|------------------------------|-----------------------------------------------------|
| 1 Spectrometer               | spect                                               |
| 2 Solvent                    | CDCl3                                               |
| 3 Temperature                | 308.0                                               |
| 4 Pulse Sequence             | zgpg30                                              |
| 5 Experiment                 | 1D                                                  |
| 6 Probe                      | 5 mm PABBO<br>BB/19F-1H/ D<br>Z-GRD<br>Z114607/0065 |
| 7 Number of Scans            | 64                                                  |
| 8 Receiver Gain              | 177                                                 |
| 9 Relaxation Delay           | 3.0000                                              |
| 10 Pulse Width               | 11.6000                                             |
| 11 Spectrometer<br>Frequency | 150.98                                              |
| 12 Spectral Width            | 37878.8                                             |
| 13 Lowest Frequency          | -7600.3                                             |
| 14 Nucleus                   | 13C                                                 |
| 15 Acquired Size             | 32768                                               |
| 16 Spectral Size             | 65536                                               |



## SAMPLE INFORMATION

|                                           |              |                     |                         |
|-------------------------------------------|--------------|---------------------|-------------------------|
| Sample Name:                              |              | Acquired By:        | System                  |
| Sample Type:                              | Unknown      | Sample Set Name:    | jwn4_78_racemic_samples |
| Vial:                                     | 7            | Acq. Method Set:    | 1_ADH 90_10 1mpm        |
| Injection #:                              | 1            | Processing Method:  | jwn4_1F_racemic         |
| Injection Volume:                         | 10.00 ul     | Channel Name:       | W2489 ChA               |
| Run Time:                                 | 75.0 Minutes | Proc. Chnl. Descr.: | W2489 ChA 254nm         |
| Date Acquired: 8/9/2016 8:36:08 PM CDT    |              |                     |                         |
| Date Processed: 8/15/2016 11:32:50 PM CDT |              |                     |                         |

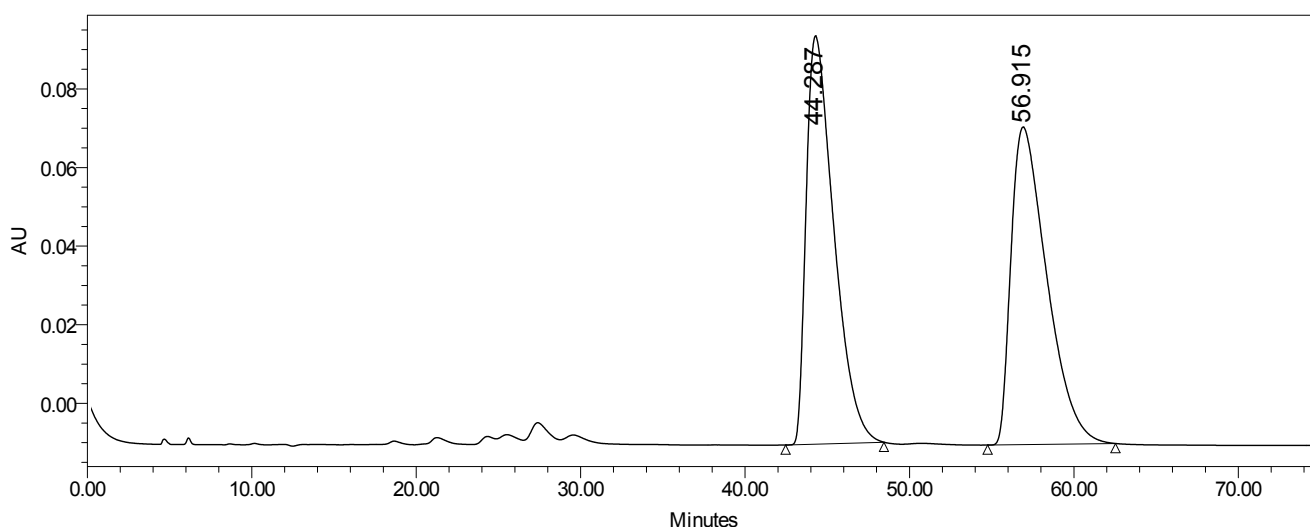

Channel: W2489 ChA; Processed Channel: W2489 ChA 254nm; Result Id: 21687; Processing Method: jwn4\_1F\_racemic

## Processed Channel Descr.: W2489 ChA 254nm

|   | Processed Channel Descr. | RT     | Area     | % Area | Height |
|---|--------------------------|--------|----------|--------|--------|
| 1 | W2489 ChA 254nm          | 44.287 | 12150312 | 49.86  | 103862 |
| 2 | W2489 ChA 254nm          | 56.915 | 12220951 | 50.14  | 80801  |

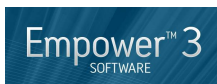

## Injection Summary Report

### SAMPLE INFORMATION

|                                                                                                                                                                                          |                                                                                                                                                                                                                                                                      |
|------------------------------------------------------------------------------------------------------------------------------------------------------------------------------------------|----------------------------------------------------------------------------------------------------------------------------------------------------------------------------------------------------------------------------------------------------------------------|
| <p>Sample Name: <br/>         Sample Type: Unknown <br/>         Vial: 11 <br/>         Injection #: 1 <br/>         Injection Volume: 10.00 ul <br/>         Run Time: 75.0 Minutes</p> | <p>Acquired By: System <br/>         Sample Set Name: jwn4_OBC_79_82 <br/>         Acq. Method Set: 1_ADH 90_10 1mpm <br/>         Processing Method: jwn4_1f_asymmetric <br/>         Channel Name: W2489 ChA <br/>         Proc. Chnl. Descr.: W2489 ChA 254nm</p> |
| <p>Date Acquired: 8/11/2016 3:17:47 PM CDT <br/>         Date Processed: 8/15/2016 11:33:51 PM CDT</p>                                                                                   |                                                                                                                                                                                                                                                                      |

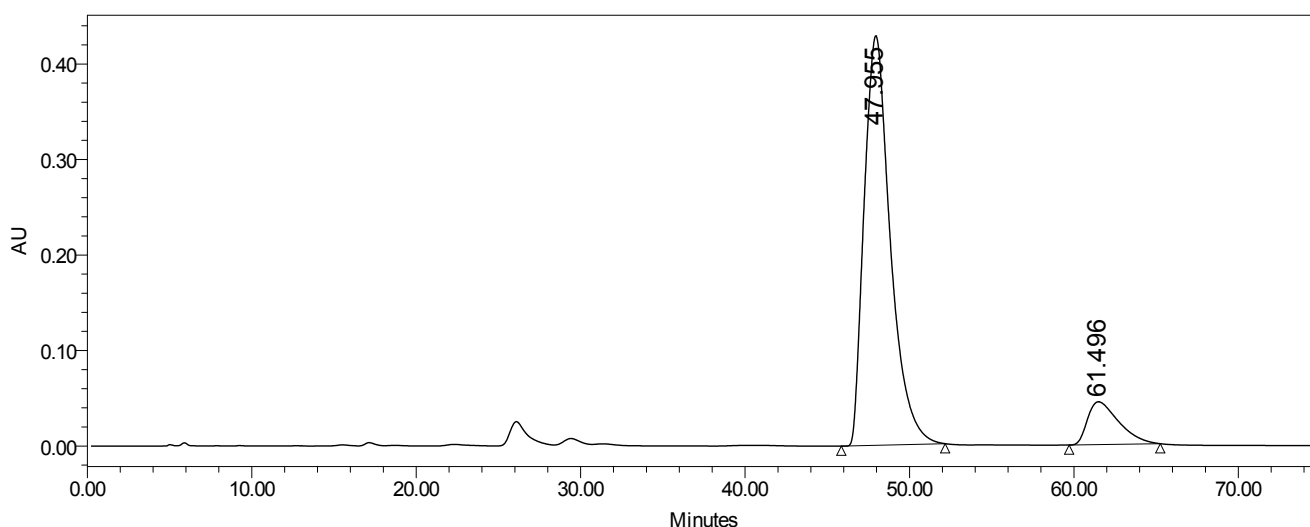

Channel: W2489 ChA; Processed Channel: W2489 ChA 254nm; Result Id: 21689; Processing Method: jwn4\_1f\_asymmetric

#### Processed Channel Descr.: W2489 ChA 254nm

|   | Processed Channel Descr. | RT     | Area     | % Area | Height |
|---|--------------------------|--------|----------|--------|--------|
| 1 | W2489 ChA 254nm          | 47.955 | 47353053 | 88.90  | 428726 |
| 2 | W2489 ChA 254nm          | 61.496 | 5912714  | 11.10  | 44868  |

| Parameter                 | Value                                             |
|---------------------------|---------------------------------------------------|
| 1 Spectrometer            | spect                                             |
| 2 Solvent                 | CDCl <sub>3</sub>                                 |
| 3 Temperature             | 298.0                                             |
| 4 Pulse Sequence          | zg30                                              |
| 5 Experiment              | 1D                                                |
| 6 Probe                   | 5 mm PABBO BB/<br>19F-1H/ D Z-GRD<br>Z114607/0065 |
| 7 Number of Scans         | 16                                                |
| 8 Receiver Gain           | 75                                                |
| 9 Relaxation Delay        | 1.0000                                            |
| 10 Pulse Width            | 11.0000                                           |
| 11 Spectrometer Frequency | 600.39                                            |
| 12 Spectral Width         | 9615.4                                            |
| 13 Lowest Frequency       | -1226.4                                           |
| 14 Nucleus                | <sup>1</sup> H                                    |
| 15 Acquired Size          | 32768                                             |
| 16 Spectral Size          | 65536                                             |

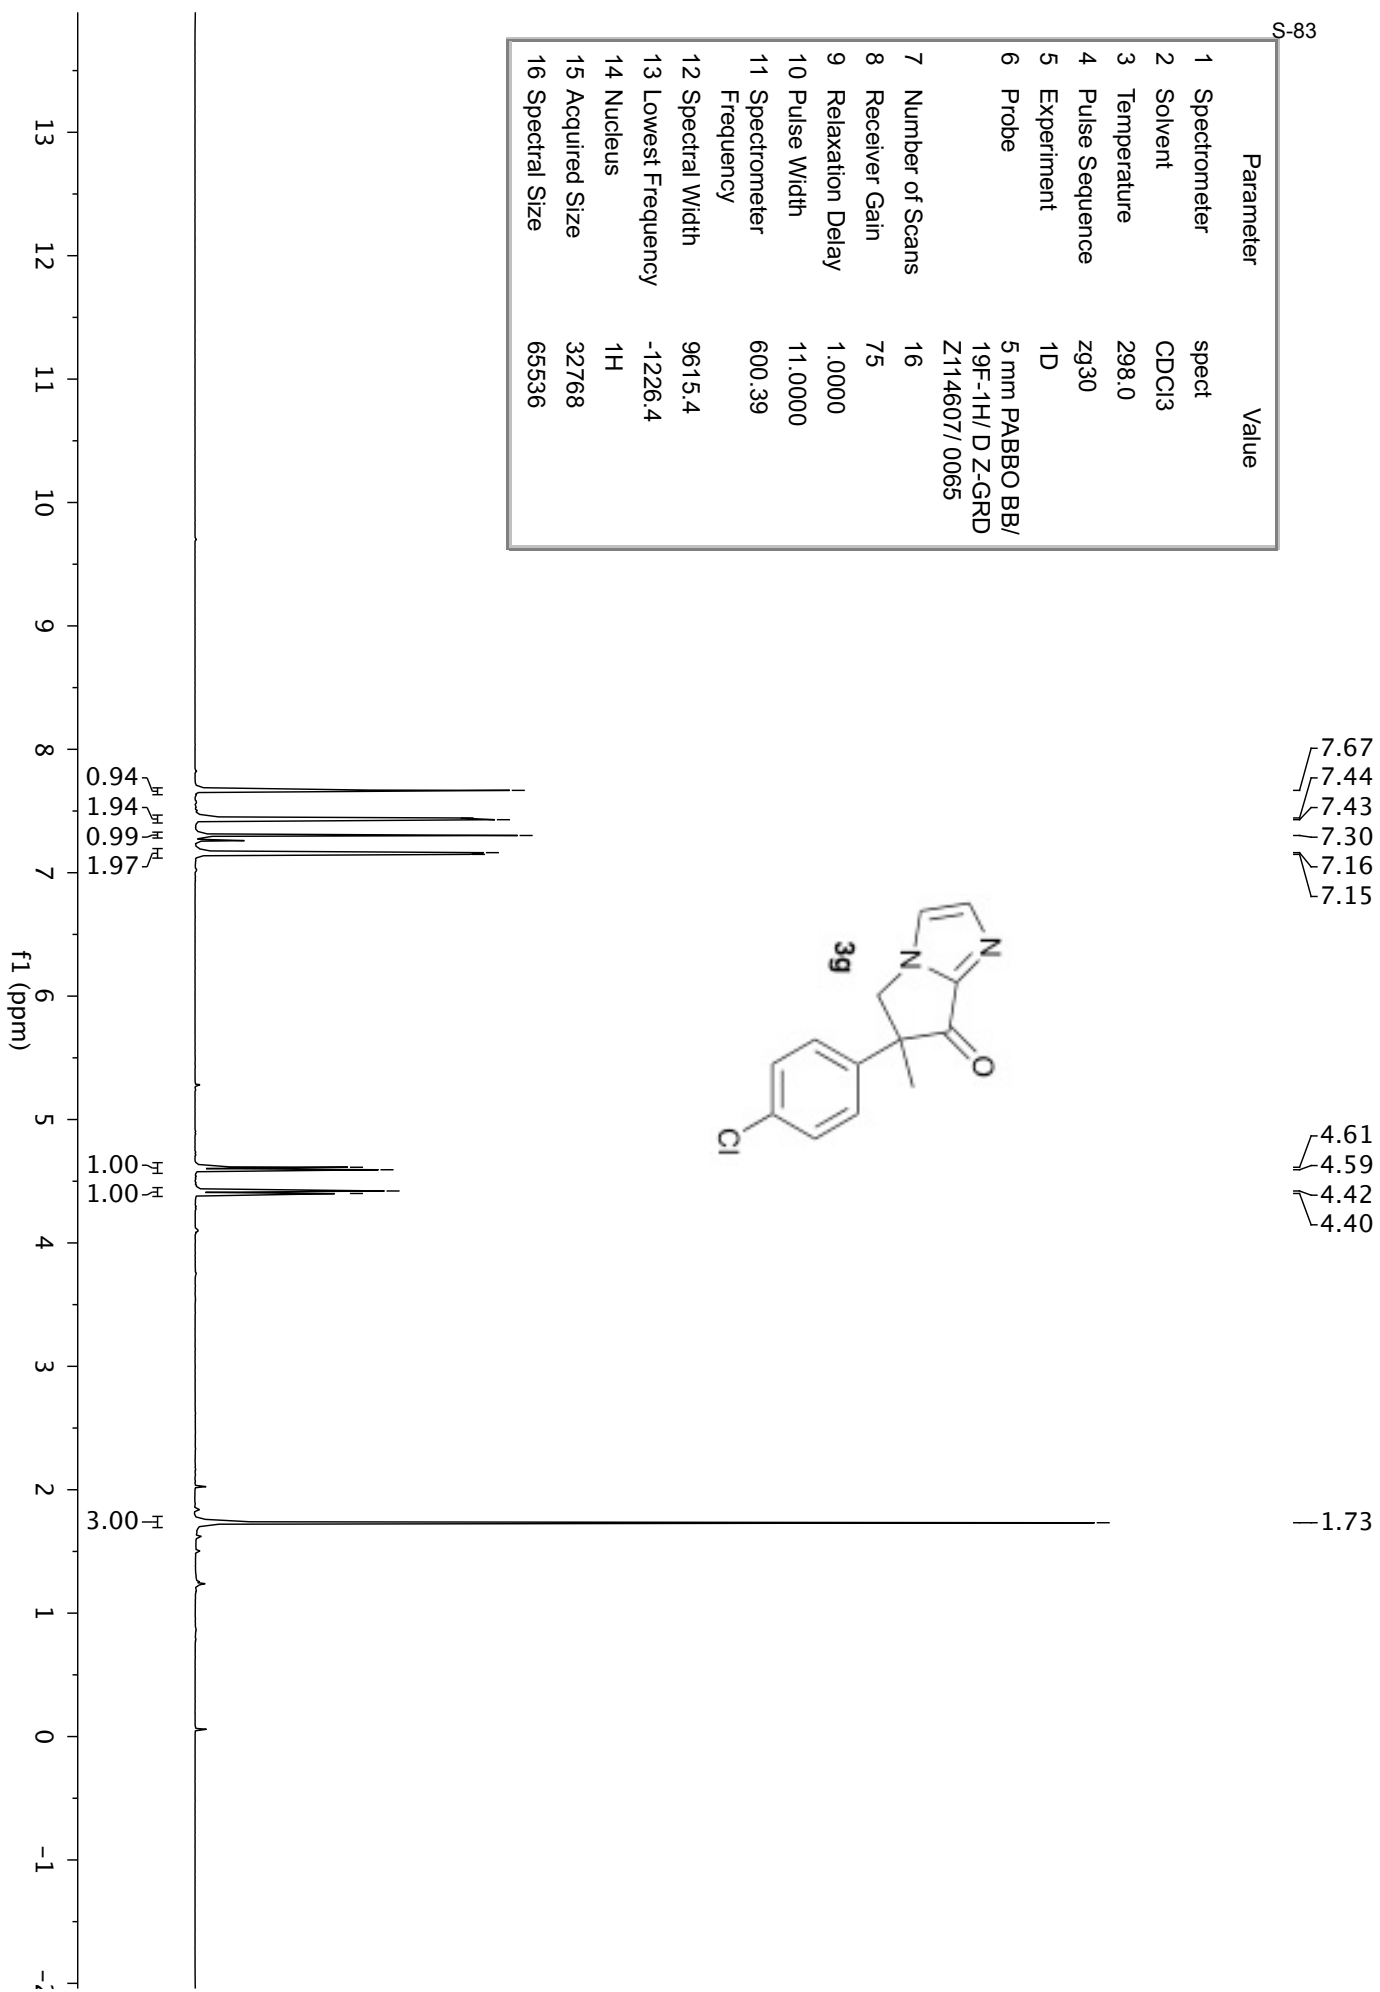

S-84

— 189.74

145.65  
140.26  
140.16

132.16  
127.77  
121.84  
120.38

56.84  
56.28

— 23.81

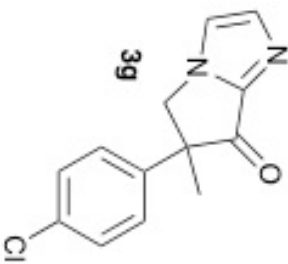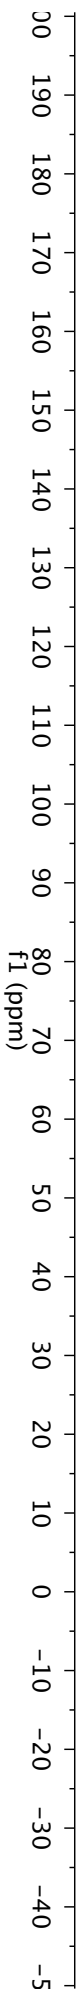

| Parameter                    | Value                                              |
|------------------------------|----------------------------------------------------|
| 1 Spectrometer               | spect                                              |
| 2 Solvent                    | CDCl3                                              |
| 3 Temperature                | 298.0                                              |
| 4 Pulse Sequence             | zgpg30                                             |
| 5 Experiment                 | 1D                                                 |
| 6 Probe                      | 5 mm PABBO<br>BB/19F-1H/D<br>Z-GRD<br>Z114607/0065 |
| 7 Number of Scans            | 51                                                 |
| 8 Receiver Gain              | 177                                                |
| 9 Relaxation Delay           | 3.0000                                             |
| 10 Pulse Width               | 11.6000                                            |
| 11 Spectrometer<br>Frequency | 150.98                                             |
| 12 Spectral Width            | 37878.8                                            |
| 13 Lowest Frequency          | -7605.8                                            |
| 14 Nucleus                   | 13C                                                |
| 15 Acquired Size             | 32768                                              |
| 16 Spectral Size             | 65536                                              |

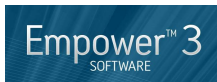

## Injection Summary Report

### SAMPLE INFORMATION

|                                           |                     |                  |
|-------------------------------------------|---------------------|------------------|
| Sample Name:                              | Acquired By:        | System           |
| Sample Type: Unknown                      | Sample Set Name:    | JWN4_1B          |
| Vial: 12                                  | Acq. Method Set:    | 1_ADH 90_10 1mpm |
| Injection #: 1                            | Processing Method:  | jwn4_1B_racemic  |
| Injection Volume: 10.00 ul                | Channel Name:       | W2489 ChA        |
| Run Time: 60.0 Minutes                    | Proc. Chnl. Descr.: | W2489 ChA 254nm  |
| Date Acquired: 8/4/2016 12:00:57 PM CDT   |                     |                  |
| Date Processed: 8/15/2016 11:18:36 PM CDT |                     |                  |

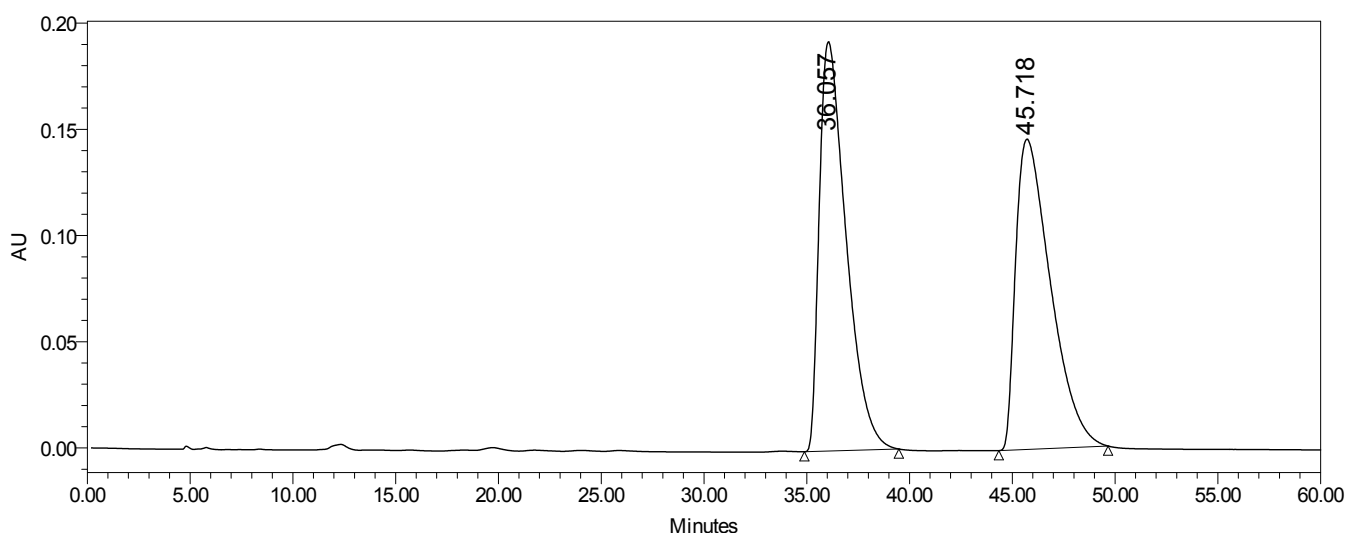

Channel: W2489 ChA; Processed Channel: W2489 ChA 254nm; Result Id: 21671; Processing Method: jwn4\_1B\_racemic

#### Processed Channel Descr.: W2489 ChA 254nm

|   | Processed Channel Descr. | RT     | Area     | % Area | Height |
|---|--------------------------|--------|----------|--------|--------|
| 1 | W2489 ChA 254nm          | 36.057 | 17467416 | 50.34  | 192696 |
| 2 | W2489 ChA 254nm          | 45.718 | 17228521 | 49.66  | 146064 |



## Injection Summary Report

### SAMPLE INFORMATION

|                                           |                     |                    |
|-------------------------------------------|---------------------|--------------------|
| Sample Name:                              | Acquired By:        | System             |
| Sample Type: Unknown                      | Sample Set Name:    | JWN4_72            |
| Vial: 1                                   | Acq. Method Set:    | 1_ADH 90_10 1mpm   |
| Injection #: 1                            | Processing Method:  | jwn4_1B_asymmetric |
| Injection Volume: 10.00 ul                | Channel Name:       | W2489 ChA          |
| Run Time: 60.0 Minutes                    | Proc. Chnl. Descr.: | W2489 ChA 254nm    |
| Date Acquired: 8/5/2016 7:15:02 PM CDT    |                     |                    |
| Date Processed: 8/15/2016 11:19:52 PM CDT |                     |                    |

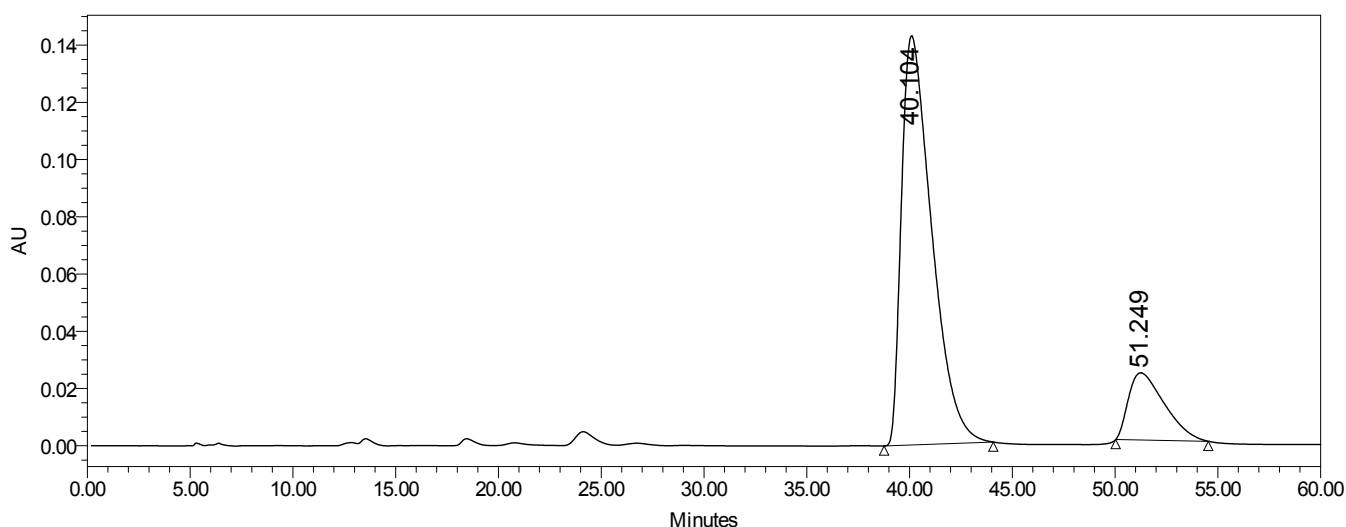

Channel: W2489 ChA; Processed Channel: W2489 ChA 254nm; Result Id: 21673; Processing Method: jwn4\_1B\_asymmetric

#### Processed Channel Descr.: W2489 ChA 254nm

|   | Processed Channel Descr. | RT     | Area     | % Area | Height |
|---|--------------------------|--------|----------|--------|--------|
| 1 | W2489 ChA 254nm          | 40.104 | 14617661 | 83.68  | 142945 |
| 2 | W2489 ChA 254nm          | 51.249 | 2851736  | 16.32  | 23466  |

| Parameter                    | Value                                             |
|------------------------------|---------------------------------------------------|
| 1 Spectrometer               | spect                                             |
| 2 Solvent                    | CDCl3                                             |
| 3 Temperature                | 298.0                                             |
| 4 Pulse Sequence             | zg30                                              |
| 5 Experiment                 | 1D                                                |
| 6 Probe                      | 5 mm PABBO BB/<br>19F-1H/ D Z-GRD<br>Z114607/0065 |
| 7 Number of Scans            | 16                                                |
| 8 Receiver Gain              | 68                                                |
| 9 Relaxation Delay           | 1.0000                                            |
| 10 Pulse Width               | 11.0000                                           |
| 11 Spectrometer<br>Frequency | 600.39                                            |
| 12 Spectral Width            | 9615.4                                            |
| 13 Lowest Frequency          | -1205.4                                           |
| 14 Nucleus                   | <sup>1</sup> H                                    |
| 15 Acquired Size             | 32768                                             |
| 16 Spectral Size             | 65536                                             |

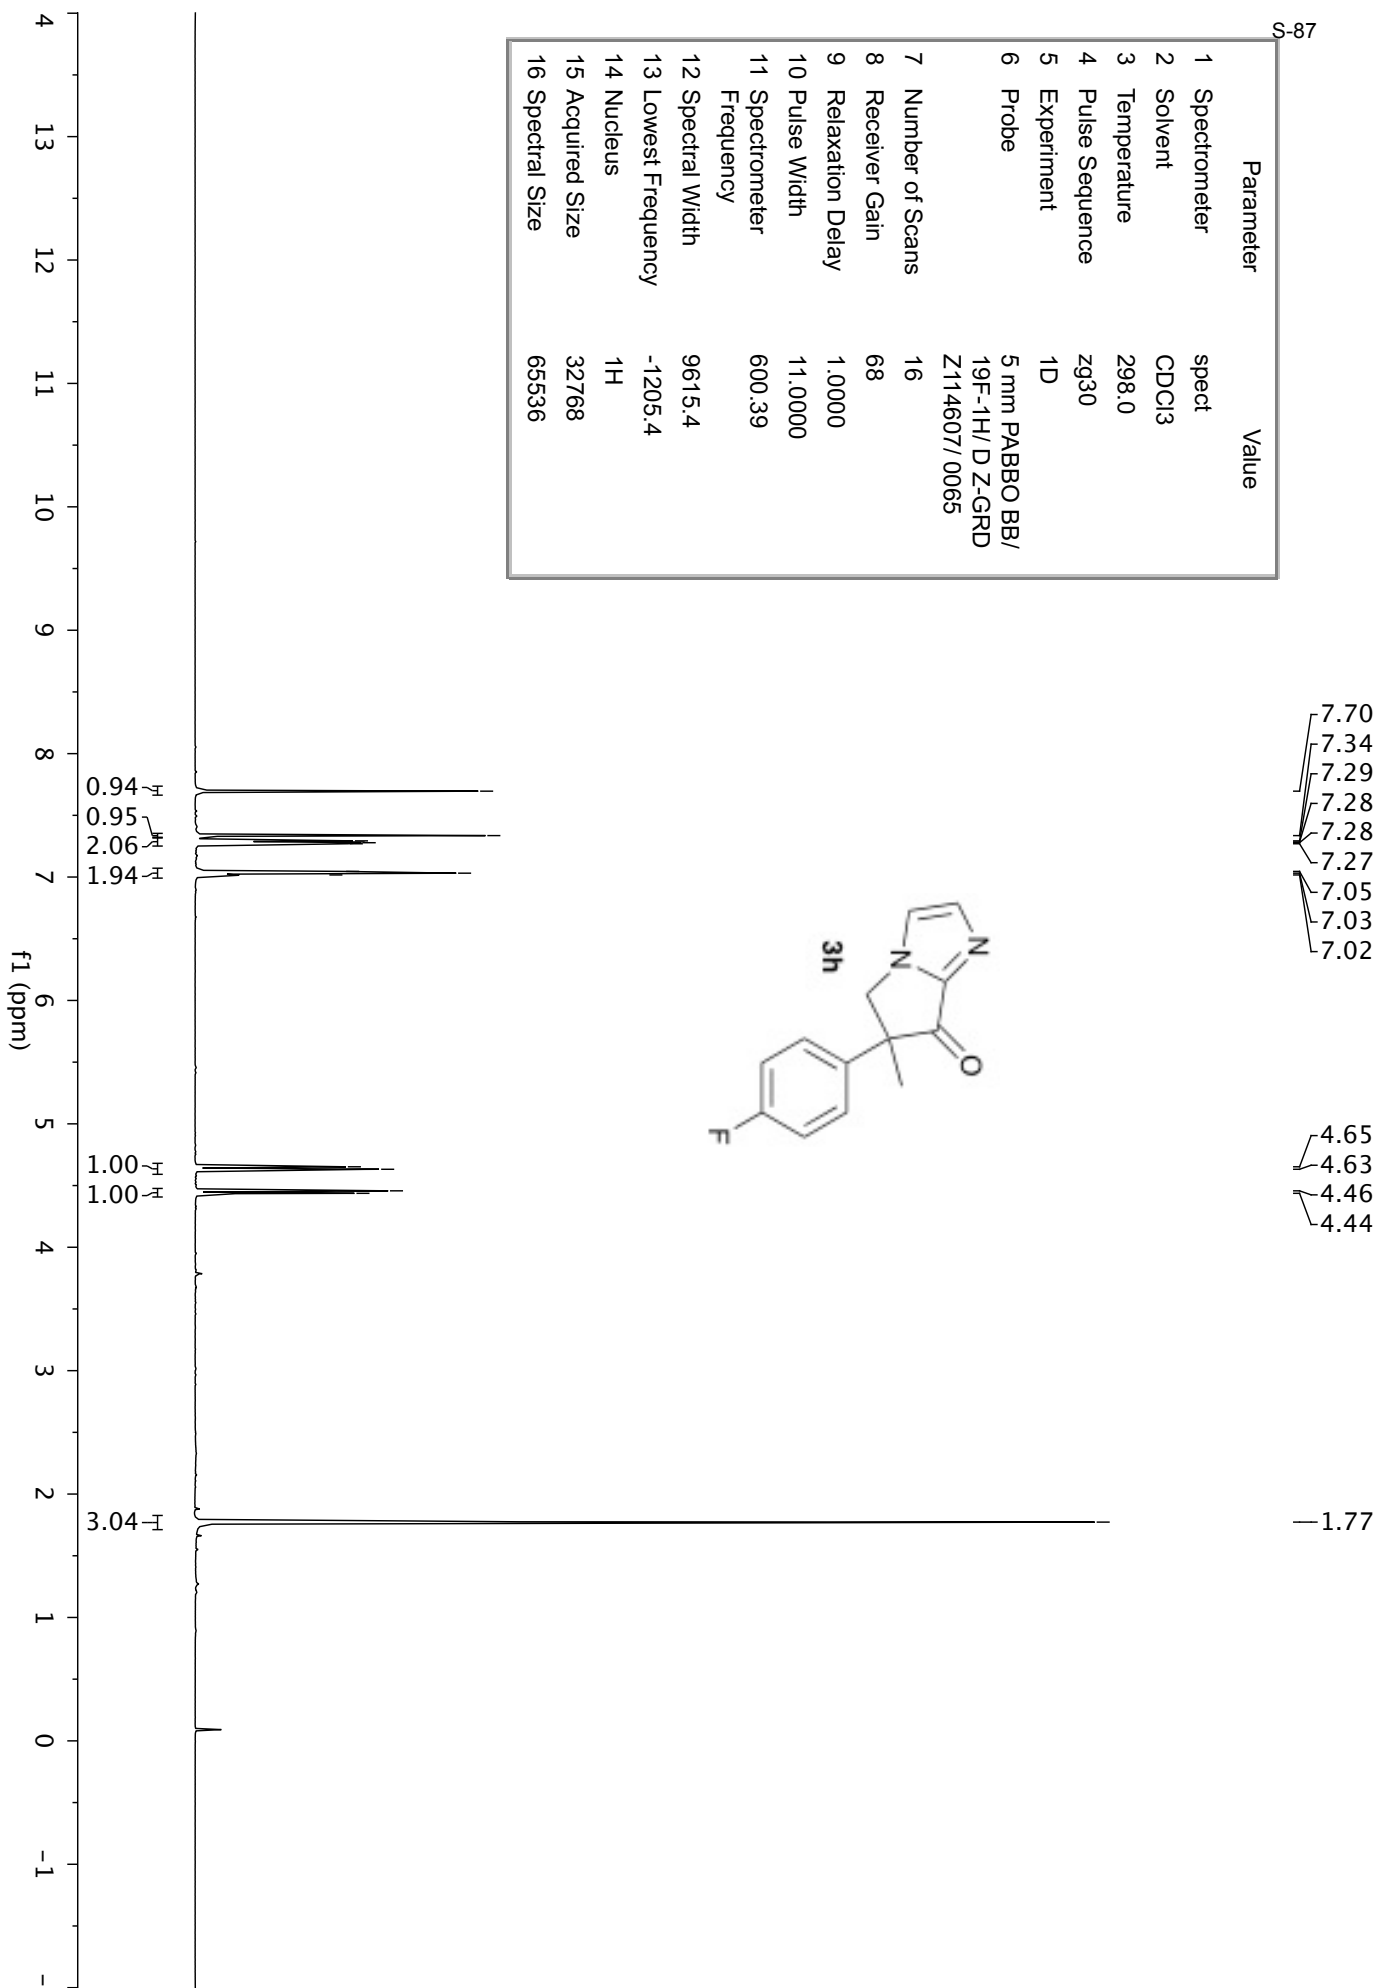

S-88  
 — 190.15  
 162.90  
 161.27  
 145.71  
 140.08  
 137.04  
 137.02  
 127.77  
 127.71  
 120.34  
 116.00  
 115.85

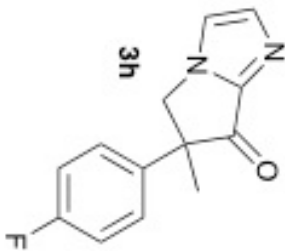

57.09  
 56.12  
 — 23.96

| Parameter                 | Value                                    |
|---------------------------|------------------------------------------|
| 1 Spectrometer            | spect                                    |
| 2 Solvent                 | CDCl3                                    |
| 3 Temperature             | 298.0                                    |
| 4 Pulse Sequence          | zgpg30                                   |
| 5 Experiment              | 1D                                       |
| 6 Probe                   | 5 mm PABBO BB/19F-1H/DZ-GRD Z114607/0065 |
| 7 Number of Scans         | 105                                      |
| 8 Receiver Gain           | 177                                      |
| 9 Relaxation Delay        | 3.0000                                   |
| 10 Pulse Width            | 11.6000                                  |
| 11 Spectrometer Frequency | 150.98                                   |
| 12 Spectral Width         | 37878.8                                  |
| 13 Lowest Frequency       | -7606.1                                  |
| 14 Nucleus                | 13C                                      |
| 15 Acquired Size          | 32768                                    |
| 16 Spectral Size          | 65536                                    |

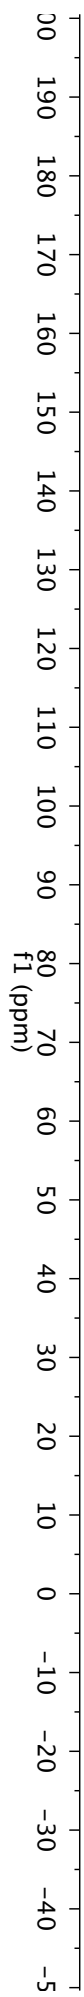



| Parameter                 | Value                                          |
|---------------------------|------------------------------------------------|
| 1 Spectrometer            | spect                                          |
| 2 Solvent                 | CDCI3                                          |
| 3 Temperature             | 298.0                                          |
| 4 Pulse Sequence          | zgfhigqn                                       |
| 5 Experiment              | 1D                                             |
| 6 Probe                   | 5 mm PABBO BB/ 19F-1H/D<br>Z-GRD Z114607/ 0065 |
| 7 Number of Scans         | 1                                              |
| 8 Receiver Gain           | 177                                            |
| 9 Relaxation Delay        | 5.0000                                         |
| 10 Pulse Width            | 14.0000                                        |
| 11 Spectrometer Frequency | 564.89                                         |
| 12 Spectral Width         | 96153.8                                        |
| 13 Lowest Frequency       | -87622.1                                       |
| 14 Nucleus                | 19F                                            |
| 15 Acquired Size          | 32768                                          |
| 16 Spectral Size          | 65536                                          |

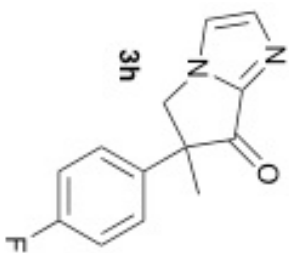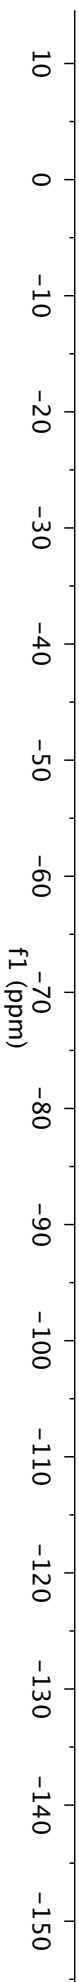

--115.08

### SAMPLE INFORMATION

|                                           |                     |                         |
|-------------------------------------------|---------------------|-------------------------|
| Sample Name:                              | Acquired By:        | System                  |
| Sample Type: Unknown                      | Sample Set Name:    | jwn4_78_racemic_samples |
| Vial: 4                                   | Acq. Method Set:    | 1_ADH 90_10 1mpm        |
| Injection #: 1                            | Processing Method:  | jwn4_1C_racemic         |
| Injection Volume: 10.00 ul                | Channel Name:       | W2489 ChA               |
| Run Time: 60.0 Minutes                    | Proc. Chnl. Descr.: | W2489 ChA 254nm         |
| Date Acquired: 8/9/2016 4:33:30 PM CDT    |                     |                         |
| Date Processed: 8/15/2016 11:22:42 PM CDT |                     |                         |

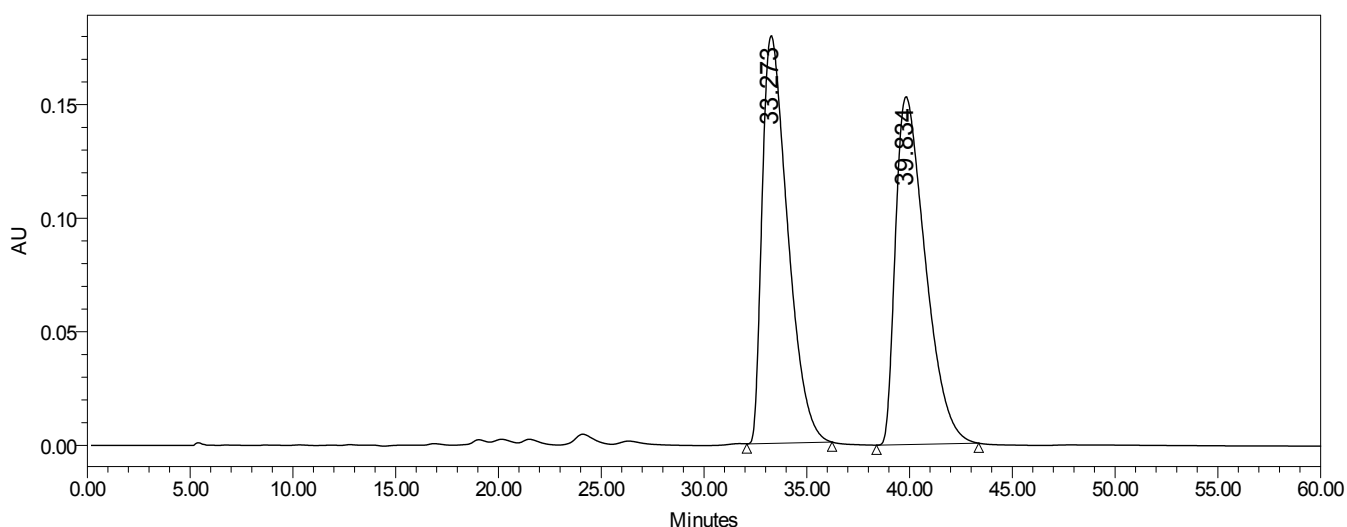

Channel: W2489 ChA; Processed Channel: W2489 ChA 254nm; Result Id: 21675; Processing Method: jwn4\_1C\_racemic

#### Processed Channel Descr.: W2489 ChA 254nm

|   | Processed Channel Descr. | RT     | Area     | % Area | Height |
|---|--------------------------|--------|----------|--------|--------|
| 1 | W2489 ChA 254nm          | 33.273 | 15454949 | 50.01  | 179410 |
| 2 | W2489 ChA 254nm          | 39.834 | 15451491 | 49.99  | 153077 |



## Injection Summary Report

### SAMPLE INFORMATION

|                                           |                     |                    |
|-------------------------------------------|---------------------|--------------------|
| Sample Name:                              | Acquired By:        | System             |
| Sample Type: Unknown                      | Sample Set Name:    | jwn4_OBC_79_82     |
| Vial: 8                                   | Acq. Method Set:    | 1_ADH 90_10 1mpm   |
| Injection #: 1                            | Processing Method:  | jwn4_1C_asymmetric |
| Injection Volume: 10.00 ul                | Channel Name:       | W2489 ChA          |
| Run Time: 60.0 Minutes                    | Proc. Chnl. Descr.: | W2489 ChA 254nm    |
| Date Acquired: 8/11/2016 12:15:51 PM CDT  |                     |                    |
| Date Processed: 8/15/2016 11:23:55 PM CDT |                     |                    |

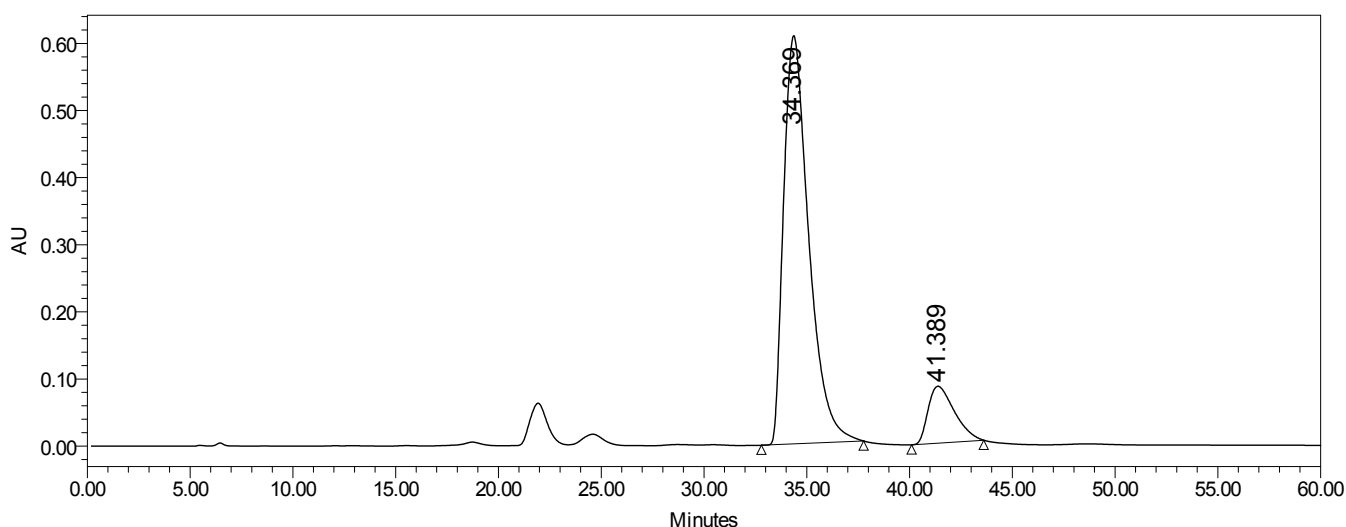

Channel: W2489 ChA; Processed Channel: W2489 ChA 254nm; Result Id: 21677; Processing Method: jwn4\_1C\_asymmetric

#### Processed Channel Descr.: W2489 ChA 254nm

|   | Processed Channel Descr. | RT     | Area     | % Area | Height |
|---|--------------------------|--------|----------|--------|--------|
| 1 | W2489 ChA 254nm          | 34.369 | 51704082 | 87.29  | 607983 |
| 2 | W2489 ChA 254nm          | 41.389 | 7530643  | 12.71  | 84727  |

| Parameter                 | Value                                              |
|---------------------------|----------------------------------------------------|
| 1 Spectrometer            | spect                                              |
| 2 Solvent                 | CDCl3                                              |
| 3 Temperature             | 298.0                                              |
| 4 Pulse Sequence          | zg30                                               |
| 5 Experiment              | 1D                                                 |
| 6 Probe                   | 5 mm PABBO<br>BB/19F-1H/D<br>Z-GRD<br>Z114607/0065 |
| 7 Number of Scans         | 16                                                 |
| 8 Receiver Gain           | 75                                                 |
| 9 Relaxation Delay        | 1.0000                                             |
| 10 Pulse Width            | 11.0000                                            |
| 11 Spectrometer Frequency | 600.39                                             |
| 12 Spectral Width         | 9615.4                                             |
| 13 Lowest Frequency       | -1205.4                                            |
| 14 Nucleus                | <sup>1</sup> H                                     |
| 15 Acquired Size          | 32768                                              |
| 16 Spectral Size          | 65536                                              |

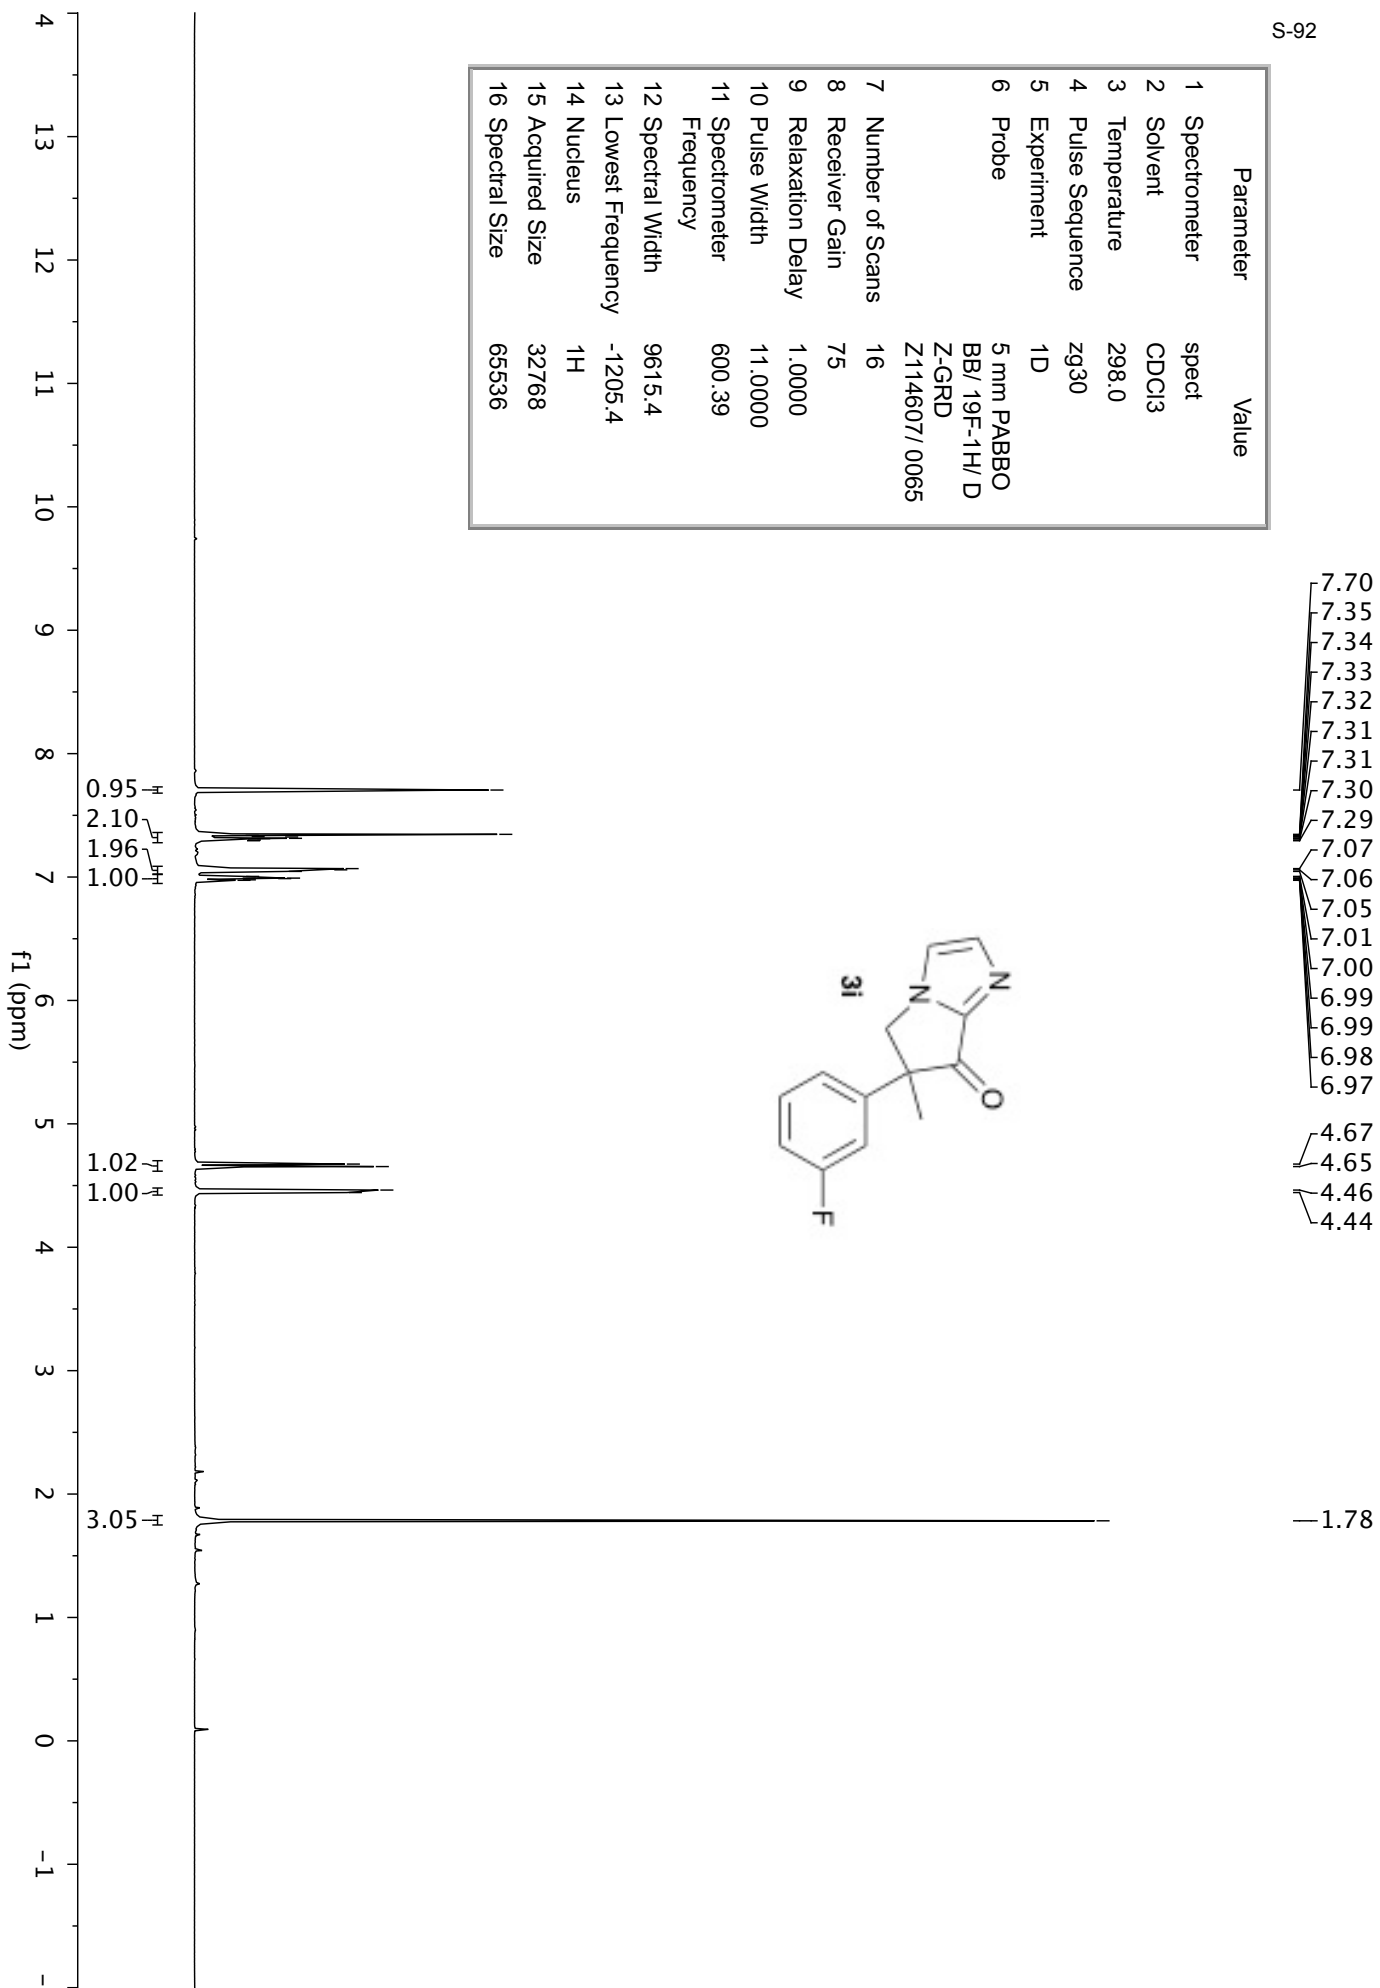

S-93

— 189.59

163.90  
162.26

145.65  
143.71  
143.67  
140.19

130.70  
130.64

121.65  
121.63  
120.40

114.79  
114.66  
113.48  
113.33

56.91  
56.41  
56.40

— 23.73

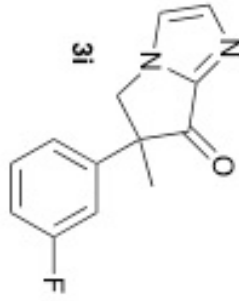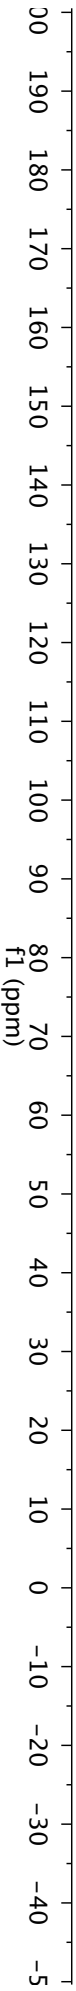

| Parameter                 | Value                                              |
|---------------------------|----------------------------------------------------|
| 1 Spectrometer            | spect                                              |
| 2 Solvent                 | CDCI3                                              |
| 3 Temperature             | 298.0                                              |
| 4 Pulse Sequence          | zgpg30                                             |
| 5 Experiment              | 1D                                                 |
| 6 Probe                   | 5 mm PABBO<br>BB/19F-1H/D<br>Z-GRD<br>Z114607/0065 |
| 7 Number of Scans         | 149                                                |
| 8 Receiver Gain           | 177                                                |
| 9 Relaxation Delay        | 3.0000                                             |
| 10 Pulse Width            | 11.6000                                            |
| 11 Spectrometer Frequency | 150.98                                             |
| 12 Spectral Width         | 37878.8                                            |
| 13 Lowest Frequency       | -7604.9                                            |
| 14 Nucleus                | 13C                                                |
| 15 Acquired Size          | 32768                                              |
| 16 Spectral Size          | 65536                                              |

| Parameter                 | Value                                           |
|---------------------------|-------------------------------------------------|
| 1 Spectrometer            | spect                                           |
| 2 Solvent                 | CDCl3                                           |
| 3 Temperature             | 298.0                                           |
| 4 Pulse Sequence          | zgffhigqn                                       |
| 5 Experiment              | 1D                                              |
| 6 Probe                   | 5 mm PABBO BB/ 19F-1H/ D<br>Z-GRD Z114607/ 0065 |
| 7 Number of Scans         | 1                                               |
| 8 Receiver Gain           | 177                                             |
| 9 Relaxation Delay        | 5.0000                                          |
| 10 Pulse Width            | 14.0000                                         |
| 11 Spectrometer Frequency | 564.89                                          |
| 12 Spectral Width         | 96153.8                                         |
| 13 Lowest Frequency       | -87622.1                                        |
| 14 Nucleus                | 19F                                             |
| 15 Acquired Size          | 32768                                           |
| 16 Spectral Size          | 65536                                           |

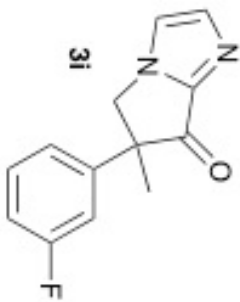

--111.98

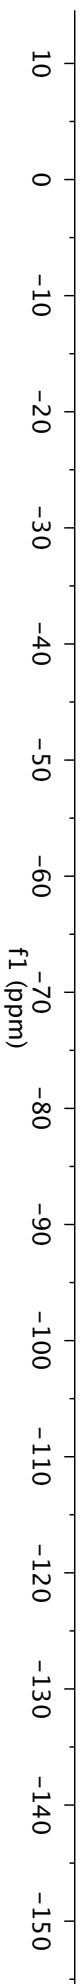

\*\*\*\*\*

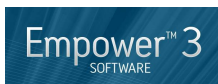

## Injection Summary Report

### SAMPLE INFORMATION

|                                                                                                                                                                                                                                                                              |                                                                                                                                                                                                                                                        |
|------------------------------------------------------------------------------------------------------------------------------------------------------------------------------------------------------------------------------------------------------------------------------|--------------------------------------------------------------------------------------------------------------------------------------------------------------------------------------------------------------------------------------------------------|
| <b>Sample Name:</b><br><b>Sample Type:</b> Unknown<br><b>Vial:</b> 5<br><b>Injection #:</b> 1<br><b>Injection Volume:</b> 10.00 ul<br><b>Run Time:</b> 60.0 Minutes<br><br><b>Date Acquired:</b> 8/9/2016 5:34:12 PM CDT<br><b>Date Processed:</b> 8/15/2016 11:25:26 PM CDT | <b>Acquired By:</b> System<br><b>Sample Set Name:</b> jwn4_78_racemic_samples<br><b>Acq. Method Set:</b> 1_ADH 90_10 1mpm<br><b>Processing Method:</b> jwn4_1D_racemic<br><b>Channel Name:</b> W2489 ChA<br><b>Proc. Chnl. Descr.:</b> W2489 ChA 254nm |
|------------------------------------------------------------------------------------------------------------------------------------------------------------------------------------------------------------------------------------------------------------------------------|--------------------------------------------------------------------------------------------------------------------------------------------------------------------------------------------------------------------------------------------------------|

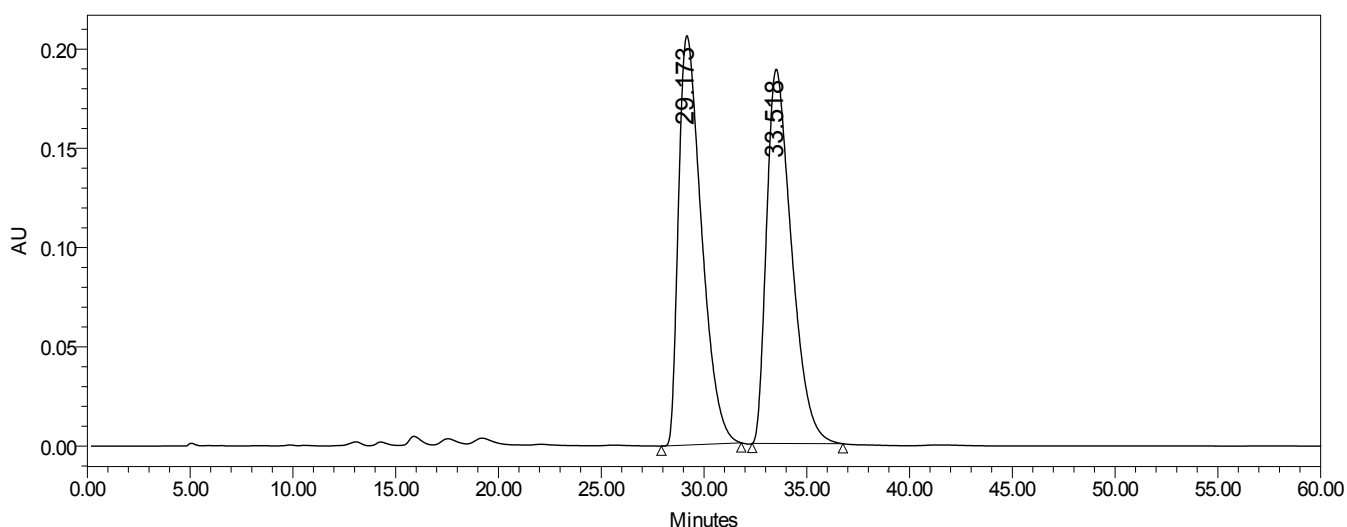

Channel: W2489 ChA; Processed Channel: W2489 ChA 254nm; Result Id: 21679; Processing Method: jwn4\_1D\_racemic

#### Processed Channel Descr.: W2489 ChA 254nm

|   | Processed Channel Descr. | RT     | Area     | % Area | Height |
|---|--------------------------|--------|----------|--------|--------|
| 1 | W2489 ChA 254nm          | 29.173 | 15992960 | 50.11  | 206110 |
| 2 | W2489 ChA 254nm          | 33.518 | 15924692 | 49.89  | 188484 |



## Injection Summary Report

### SAMPLE INFORMATION

|                                           |                     |                    |
|-------------------------------------------|---------------------|--------------------|
| Sample Name:                              | Acquired By:        | System             |
| Sample Type: Unknown                      | Sample Set Name:    | jwn4_OBC_79_82     |
| Vial: 9                                   | Acq. Method Set:    | 1_ADH 90_10 1mpm   |
| Injection #: 1                            | Processing Method:  | jwn4_1d_asymmetric |
| Injection Volume: 10.00 ul                | Channel Name:       | W2489 ChA          |
| Run Time: 60.0 Minutes                    | Proc. Chnl. Descr.: | W2489 ChA 254nm    |
| Date Acquired: 8/11/2016 1:16:30 PM CDT   |                     |                    |
| Date Processed: 8/15/2016 11:26:29 PM CDT |                     |                    |

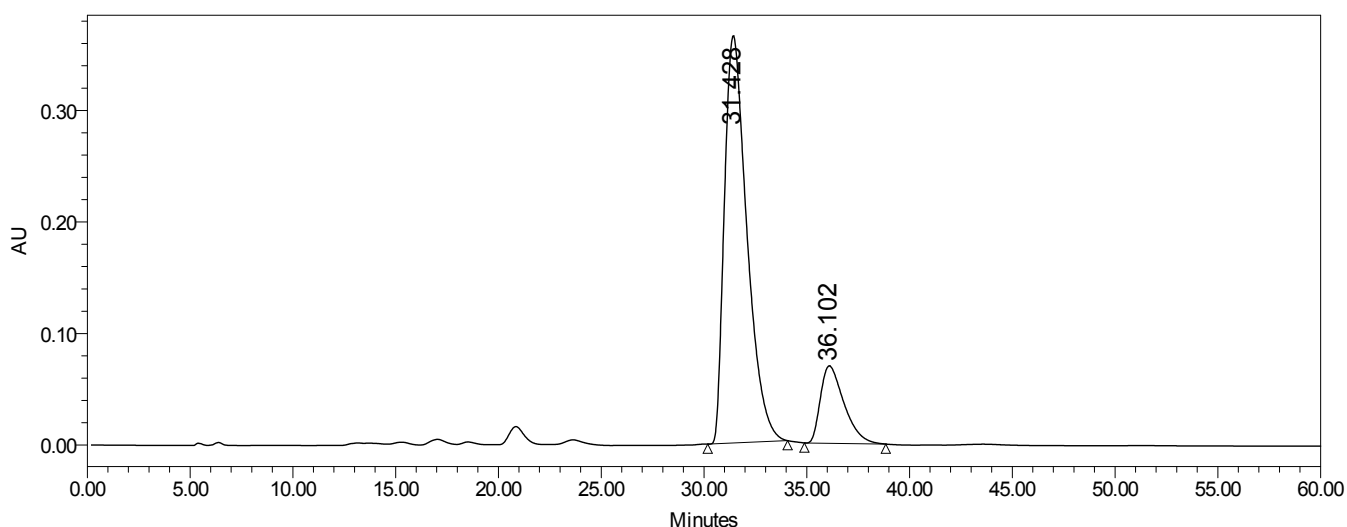

Channel: W2489 ChA; Processed Channel: W2489 ChA 254nm; Result Id: 21681; Processing Method: jwn4\_1d\_asymmetric

#### Processed Channel Descr.: W2489 ChA 254nm

|   | Processed Channel Descr. | RT     | Area     | % Area | Height |
|---|--------------------------|--------|----------|--------|--------|
| 1 | W2489 ChA 254nm          | 31.428 | 27787054 | 83.39  | 364987 |
| 2 | W2489 ChA 254nm          | 36.102 | 5533299  | 16.61  | 69388  |



| Parameter                    | Value                                             |
|------------------------------|---------------------------------------------------|
| 1 Spectrometer               | spect                                             |
| 2 Solvent                    | CDCl3                                             |
| 3 Temperature                | 298.0                                             |
| 4 Pulse Sequence             | zg30                                              |
| 5 Experiment                 | 1D                                                |
| 6 Probe                      | 5 mm PABBO BB/<br>19F-1H/ D Z-GRD<br>Z114607/0065 |
| 7 Number of Scans            | 16                                                |
| 8 Receiver Gain              | 68                                                |
| 9 Relaxation Delay           | 1.0000                                            |
| 10 Pulse Width               | 11.0000                                           |
| 11 Spectrometer<br>Frequency | 600.39                                            |
| 12 Spectral Width            | 9615.4                                            |
| 13 Lowest Frequency          | -1226.4                                           |
| 14 Nucleus                   | <sup>1</sup> H                                    |
| 15 Acquired Size             | 32768                                             |
| 16 Spectral Size             | 65536                                             |

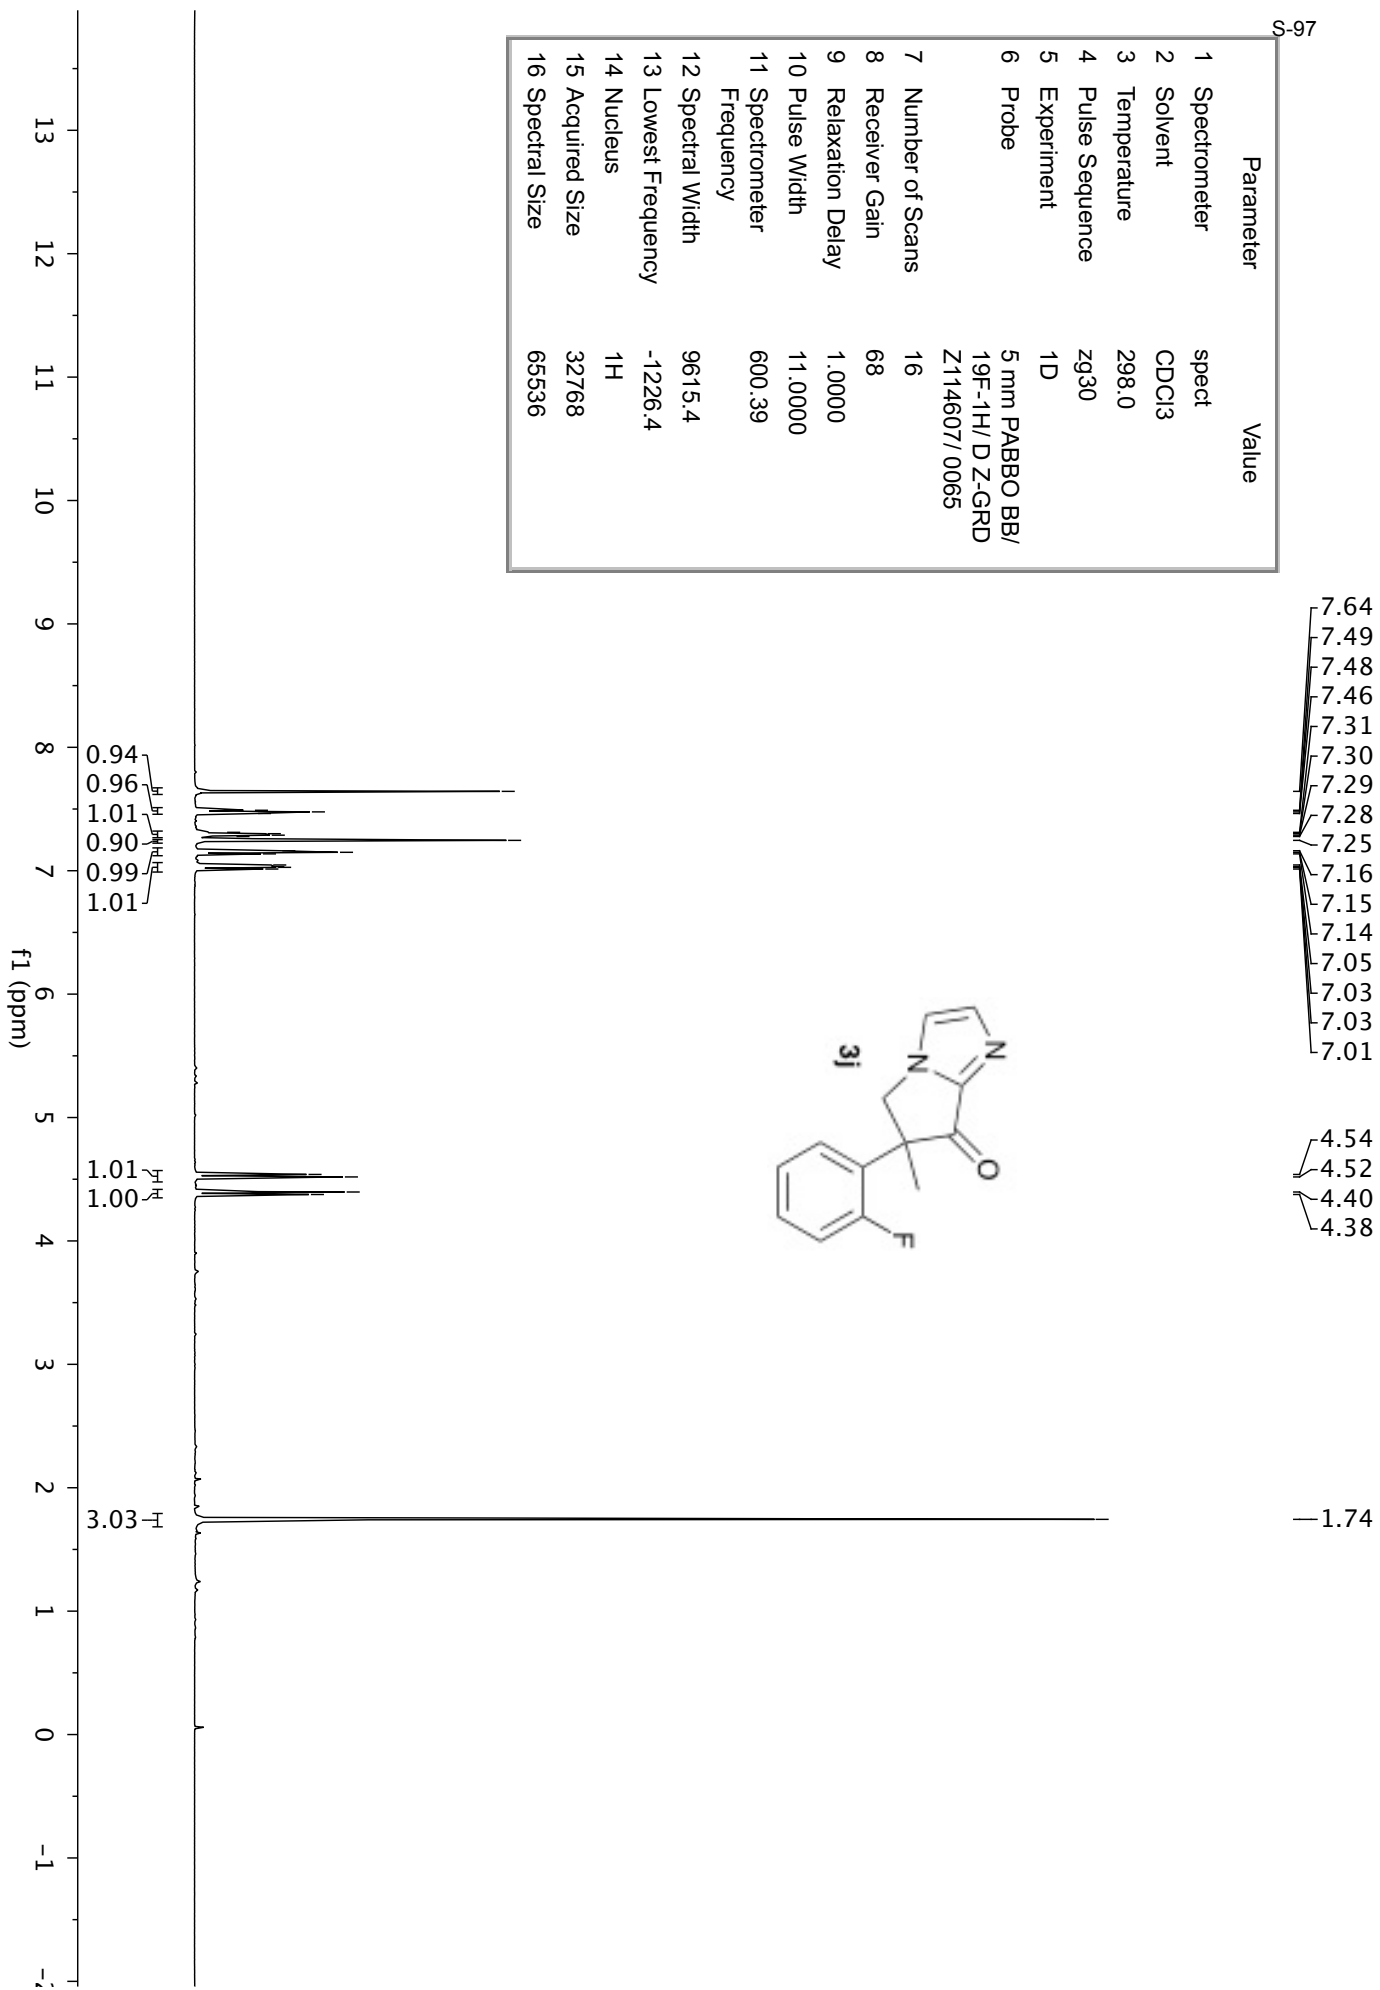

S-98  
 — 189.90  
 ~ 161.54  
 ~ 159.91  
 — 145.51  
 — 139.59  
 — 129.95  
 — 129.89  
 — 128.22  
 — 128.19  
 — 128.11  
 — 128.02  
 — 124.55  
 — 124.52  
 — 119.87  
 — 116.22  
 — 116.08

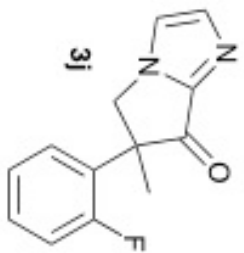

56.21  
 56.18  
 54.09  
 — 23.20

| Parameter                    | Value                                                   |
|------------------------------|---------------------------------------------------------|
| 1 Spectrometer               | spect                                                   |
| 2 Solvent                    | CDCl3                                                   |
| 3 Temperature                | 298.0                                                   |
| 4 Pulse Sequence             | zpgpg30                                                 |
| 5 Experiment                 | 1D                                                      |
| 6 Probe                      | 5 mm PABBO<br>BB/19F-1H/<br>D-Z-GRD<br>Z114607/<br>0065 |
| 7 Number of Scans            | 109                                                     |
| 8 Receiver Gain              | 177                                                     |
| 9 Relaxation Delay           | 3.0000                                                  |
| 10 Pulse Width               | 11.6000                                                 |
| 11 Spectrometer<br>Frequency | 150.98                                                  |
| 12 Spectral Width            | 37878.8                                                 |
| 13 Lowest Frequency          | -7605.2                                                 |
| 14 Nucleus                   | 13C                                                     |
| 15 Acquired Size             | 32768                                                   |
| 16 Spectral Size             | 65536                                                   |

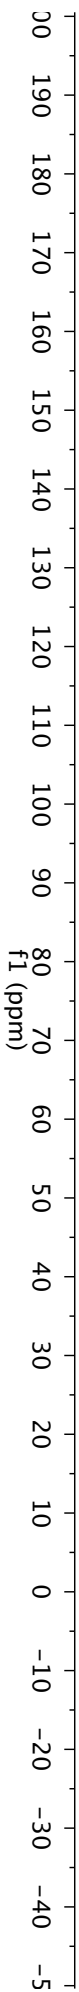





## Injection Summary Report

### SAMPLE INFORMATION

|                                           |                     |                         |
|-------------------------------------------|---------------------|-------------------------|
| Sample Name:                              | Acquired By:        | System                  |
| Sample Type: Unknown                      | Sample Set Name:    | jwn4_78_racemic_samples |
| Vial: 6                                   | Acq. Method Set:    | 1_ADH 90_10 1mpm        |
| Injection #: 1                            | Processing Method:  | jwn4_1e_racemic         |
| Injection Volume: 10.00 ul                | Channel Name:       | W2489 ChA               |
| Run Time: 60.0 Minutes                    | Proc. Chnl. Descr.: | W2489 ChA 254nm         |
| Date Acquired: 8/9/2016 6:34:49 PM CDT    |                     |                         |
| Date Processed: 8/15/2016 11:30:04 PM CDT |                     |                         |

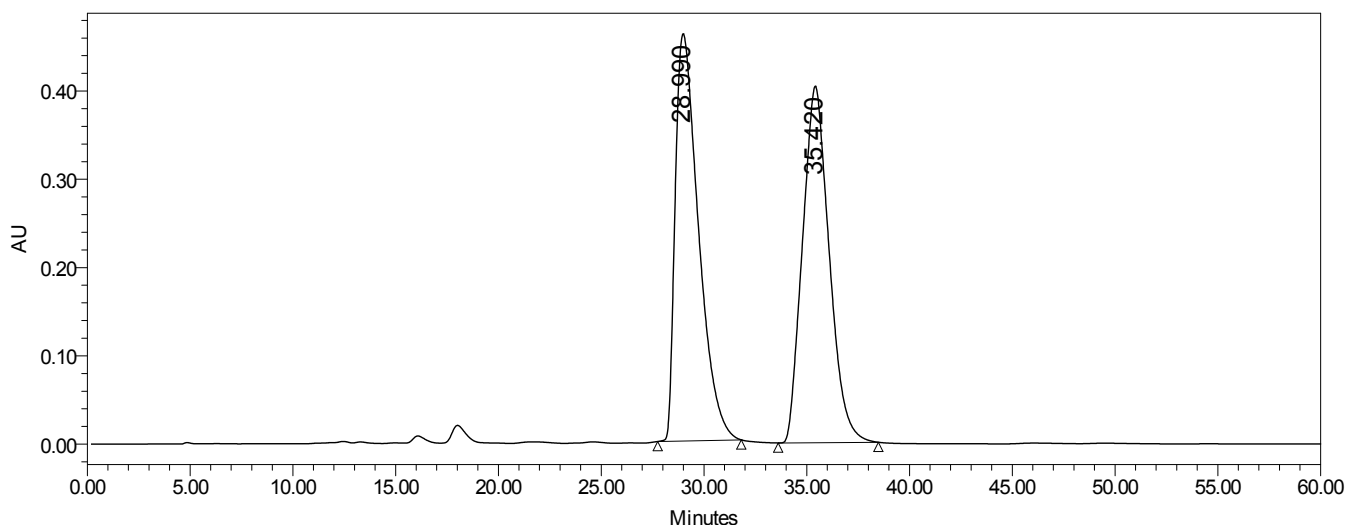

Channel: W2489 ChA; Processed Channel: W2489 ChA 254nm; Result Id: 21683; Processing Method: jwn4\_1e\_racemic

#### Processed Channel Descr.: W2489 ChA 254nm

|   | Processed Channel Descr. | RT     | Area     | % Area | Height |
|---|--------------------------|--------|----------|--------|--------|
| 1 | W2489 ChA 254nm          | 28.990 | 36251472 | 49.90  | 461213 |
| 2 | W2489 ChA 254nm          | 35.420 | 36393626 | 50.10  | 403818 |



## Injection Summary Report

### SAMPLE INFORMATION

|                            |                     |                    |
|----------------------------|---------------------|--------------------|
| Sample Name:               | Acquired By:        | System             |
| Sample Type: Unknown       | Sample Set Name:    | jwn4_OBC_79_82     |
| Vial: 10                   | Acq. Method Set:    | 1_ADH 90_10 1mpm   |
| Injection #: 1             | Processing Method:  | jwn4_1e_asymmetric |
| Injection Volume: 10.00 ul | Channel Name:       | W2489 ChA          |
| Run Time: 60.0 Minutes     | Proc. Chnl. Descr.: | W2489 ChA 254nm    |

Date Acquired: 8/11/2016 2:17:07 PM CDT  
 Date Processed: 8/15/2016 11:31:22 PM CDT

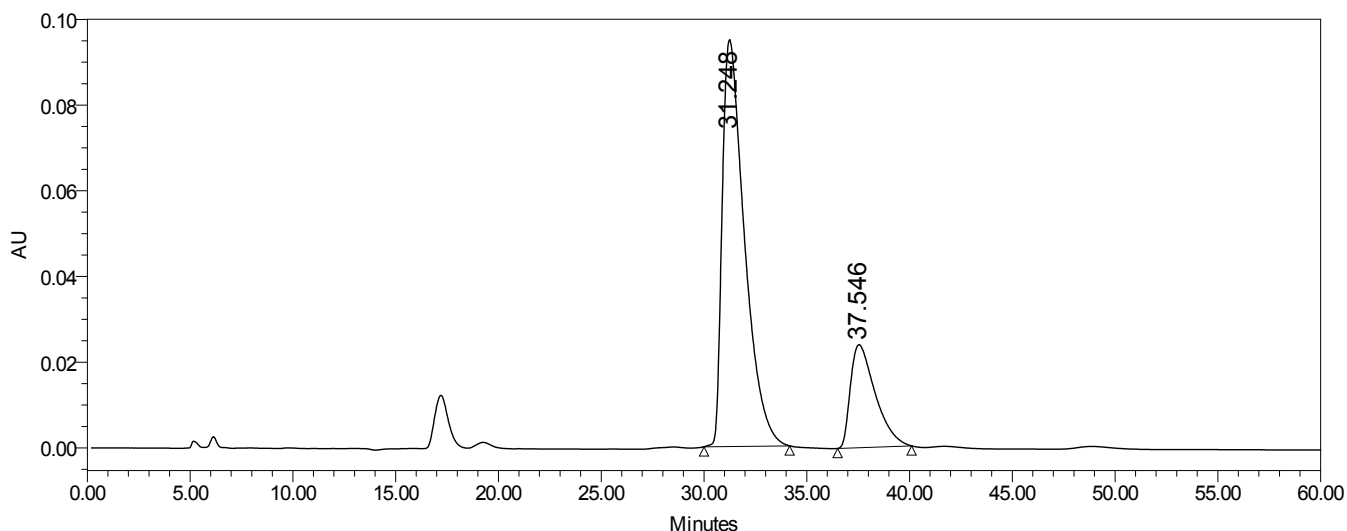

Channel: W2489 ChA; Processed Channel: W2489 ChA 254nm; Result Id: 21685; Processing Method: jwn4\_1e\_asymmetric

#### Processed Channel Descr.: W2489 ChA 254nm

|   | Processed Channel Descr. | RT     | Area    | % Area | Height |
|---|--------------------------|--------|---------|--------|--------|
| 1 | W2489 ChA 254nm          | 31.248 | 7147758 | 78.00  | 94883  |
| 2 | W2489 ChA 254nm          | 37.546 | 2016177 | 22.00  | 24023  |

| Parameter                    | Value                                             |
|------------------------------|---------------------------------------------------|
| 1 Spectrometer               | spect                                             |
| 2 Solvent                    | CDCl3                                             |
| 3 Temperature                | 298.0                                             |
| 4 Pulse Sequence             | zg30                                              |
| 5 Experiment                 | 1D                                                |
| 6 Probe                      | 5 mm PABBO BB/<br>19F-1H/ D Z-GRD<br>Z114607/0065 |
| 7 Number of Scans            | 16                                                |
| 8 Receiver Gain              | 75                                                |
| 9 Relaxation Delay           | 1.0000                                            |
| 10 Pulse Width               | 11.0000                                           |
| 11 Spectrometer<br>Frequency | 600.39                                            |
| 12 Spectral Width            | 9615.4                                            |
| 13 Lowest Frequency          | -1226.4                                           |
| 14 Nucleus                   | <sup>1</sup> H                                    |
| 15 Acquired Size             | 32768                                             |
| 16 Spectral Size             | 65536                                             |

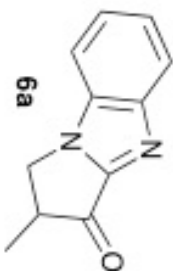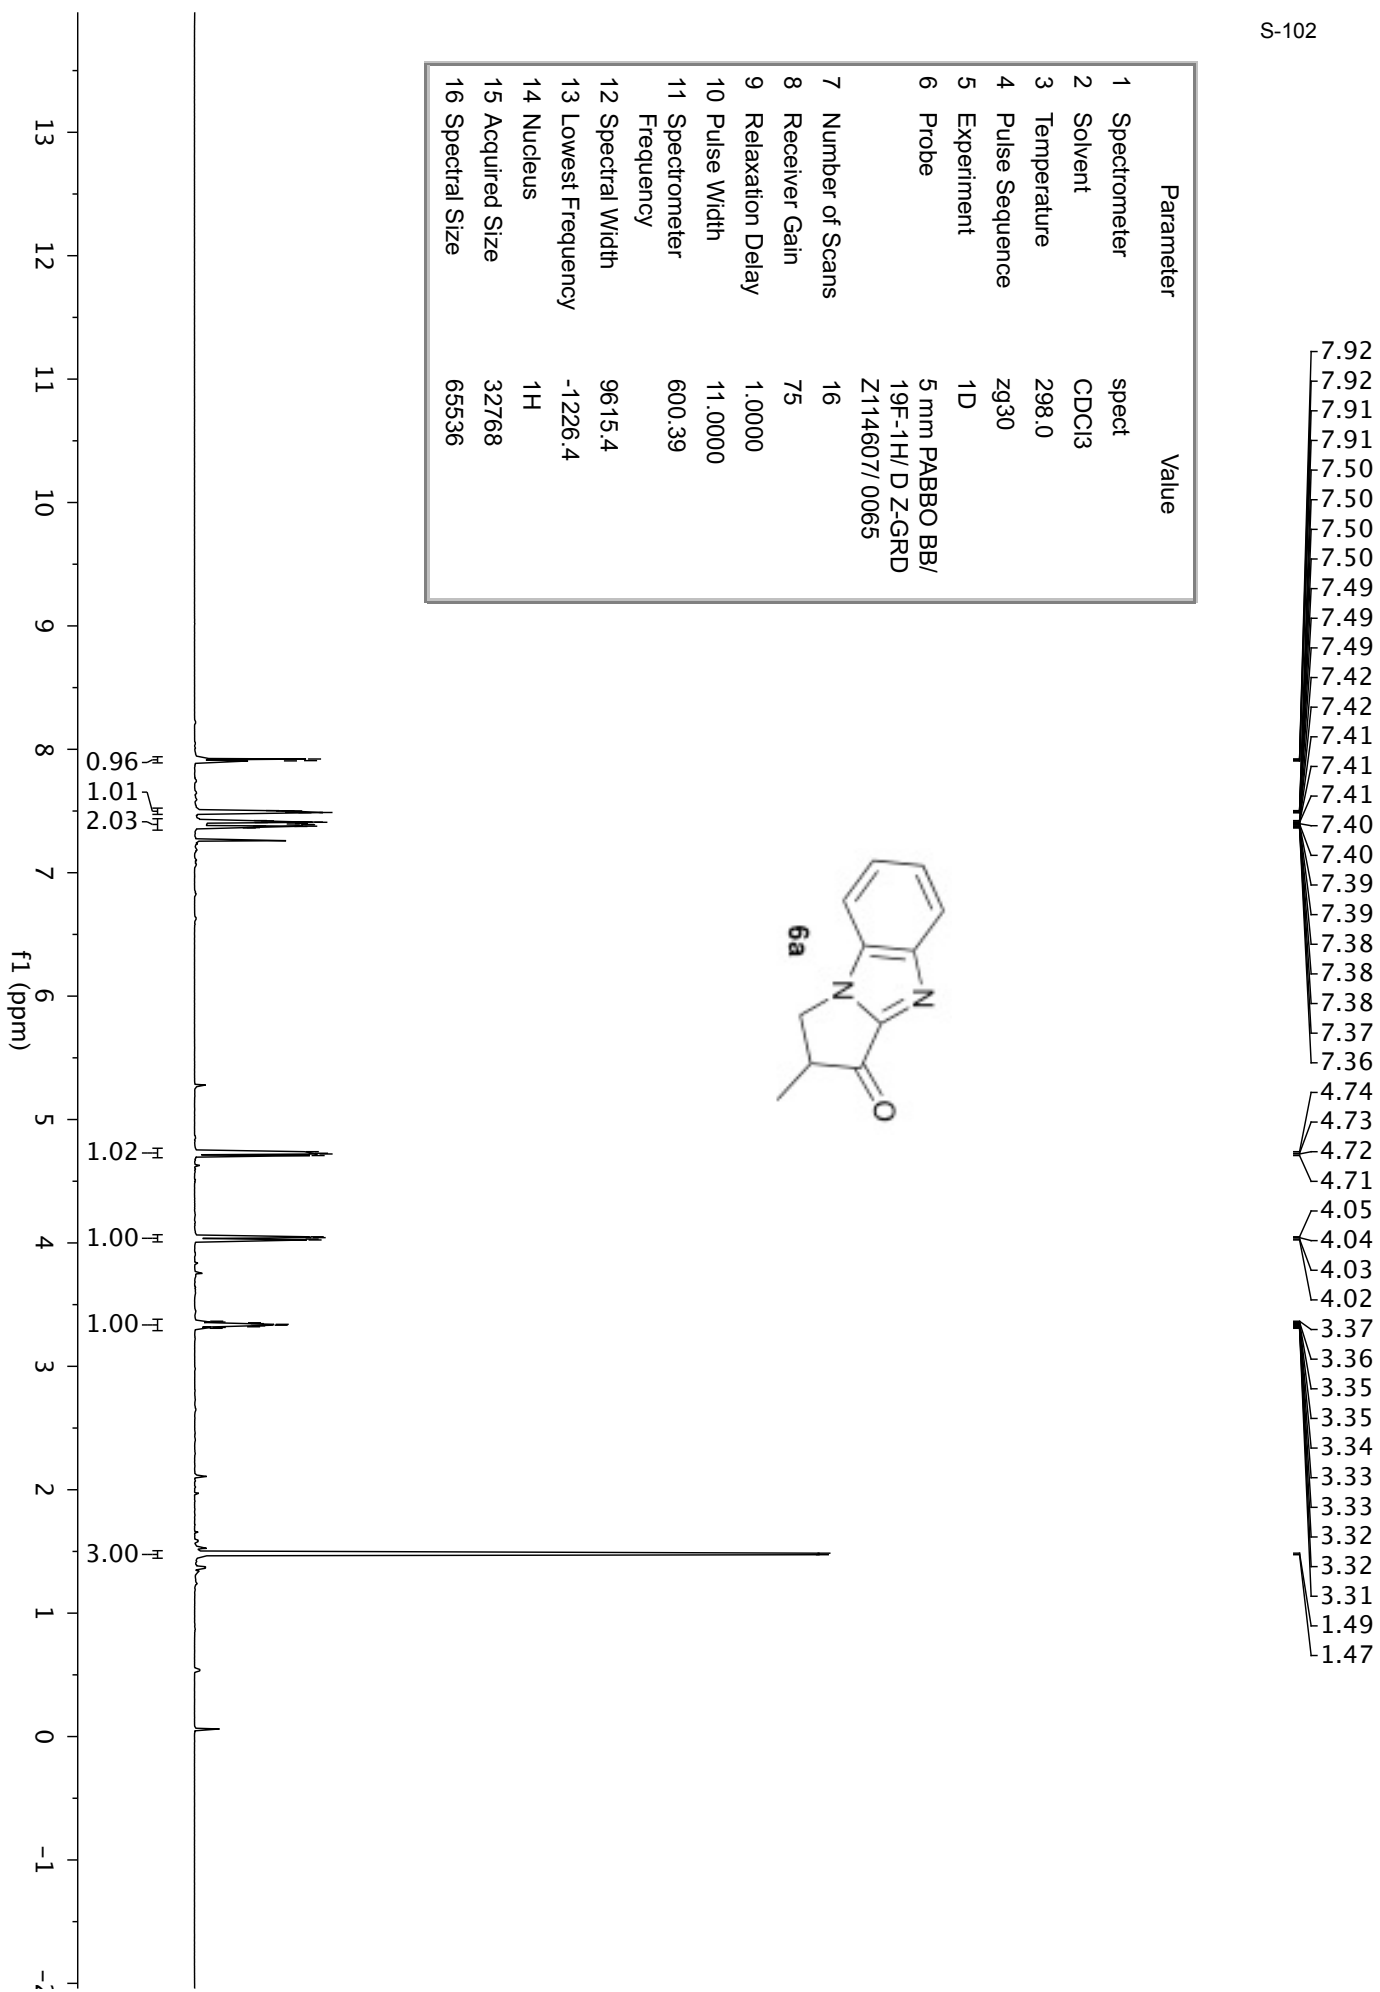

S-103  
— 193.66

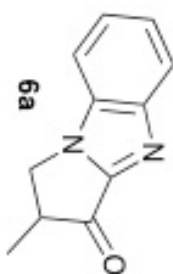

149.44  
149.13

132.76  
125.64  
124.85  
123.22

— 111.05

47.02  
45.03

— 15.37

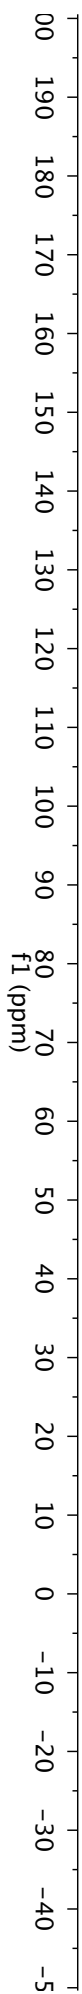

| Parameter                    | Value                                                       |
|------------------------------|-------------------------------------------------------------|
| 1 Spectrometer               | spect                                                       |
| 2 Solvent                    | CDCl3                                                       |
| 3 Temperature                | 298.0                                                       |
| 4 Pulse Sequence             | zpgp30                                                      |
| 5 Experiment                 | 1D                                                          |
| 6 Probe                      | 5 mm<br>PABBO BB/<br>19F-1H/D-Z-<br>GRD<br>Z114607/<br>0065 |
| 7 Number of Scans            | 127                                                         |
| 8 Receiver Gain              | 177                                                         |
| 9 Relaxation Delay           | 3.0000                                                      |
| 10 Pulse Width               | 11.6000                                                     |
| 11 Spectrometer<br>Frequency | 150.98                                                      |
| 12 Spectral Width            | 37878.8                                                     |
| 13 Lowest<br>Frequency       | -7603.6                                                     |
| 14 Nucleus                   | 13C                                                         |
| 15 Acquired Size             | 32768                                                       |
| 16 Spectral Size             | 65536                                                       |

| Parameter                 | Value          |
|---------------------------|----------------|
| 1 Spectrometer            | nmrs           |
| 2 Solvent                 | cdcl3          |
| 3 Temperature             | 25.0           |
| 4 Pulse Sequence          | s2pul          |
| 5 Experiment              | 1D             |
| 6 Probe                   | OneNMR_W024    |
| 7 Number of Scans         | 8              |
| 8 Receiver Gain           | 18             |
| 9 Relaxation Delay        | 1.0000         |
| 10 Pulse Width            | 0.0000         |
| 11 Spectrometer Frequency | 399.69         |
| 12 Spectral Width         | 6410.3         |
| 13 Lowest Frequency       | -803.0         |
| 14 Nucleus                | <sup>1</sup> H |
| 15 Acquired Size          | 16384          |
| 16 Spectral Size          | 65536          |

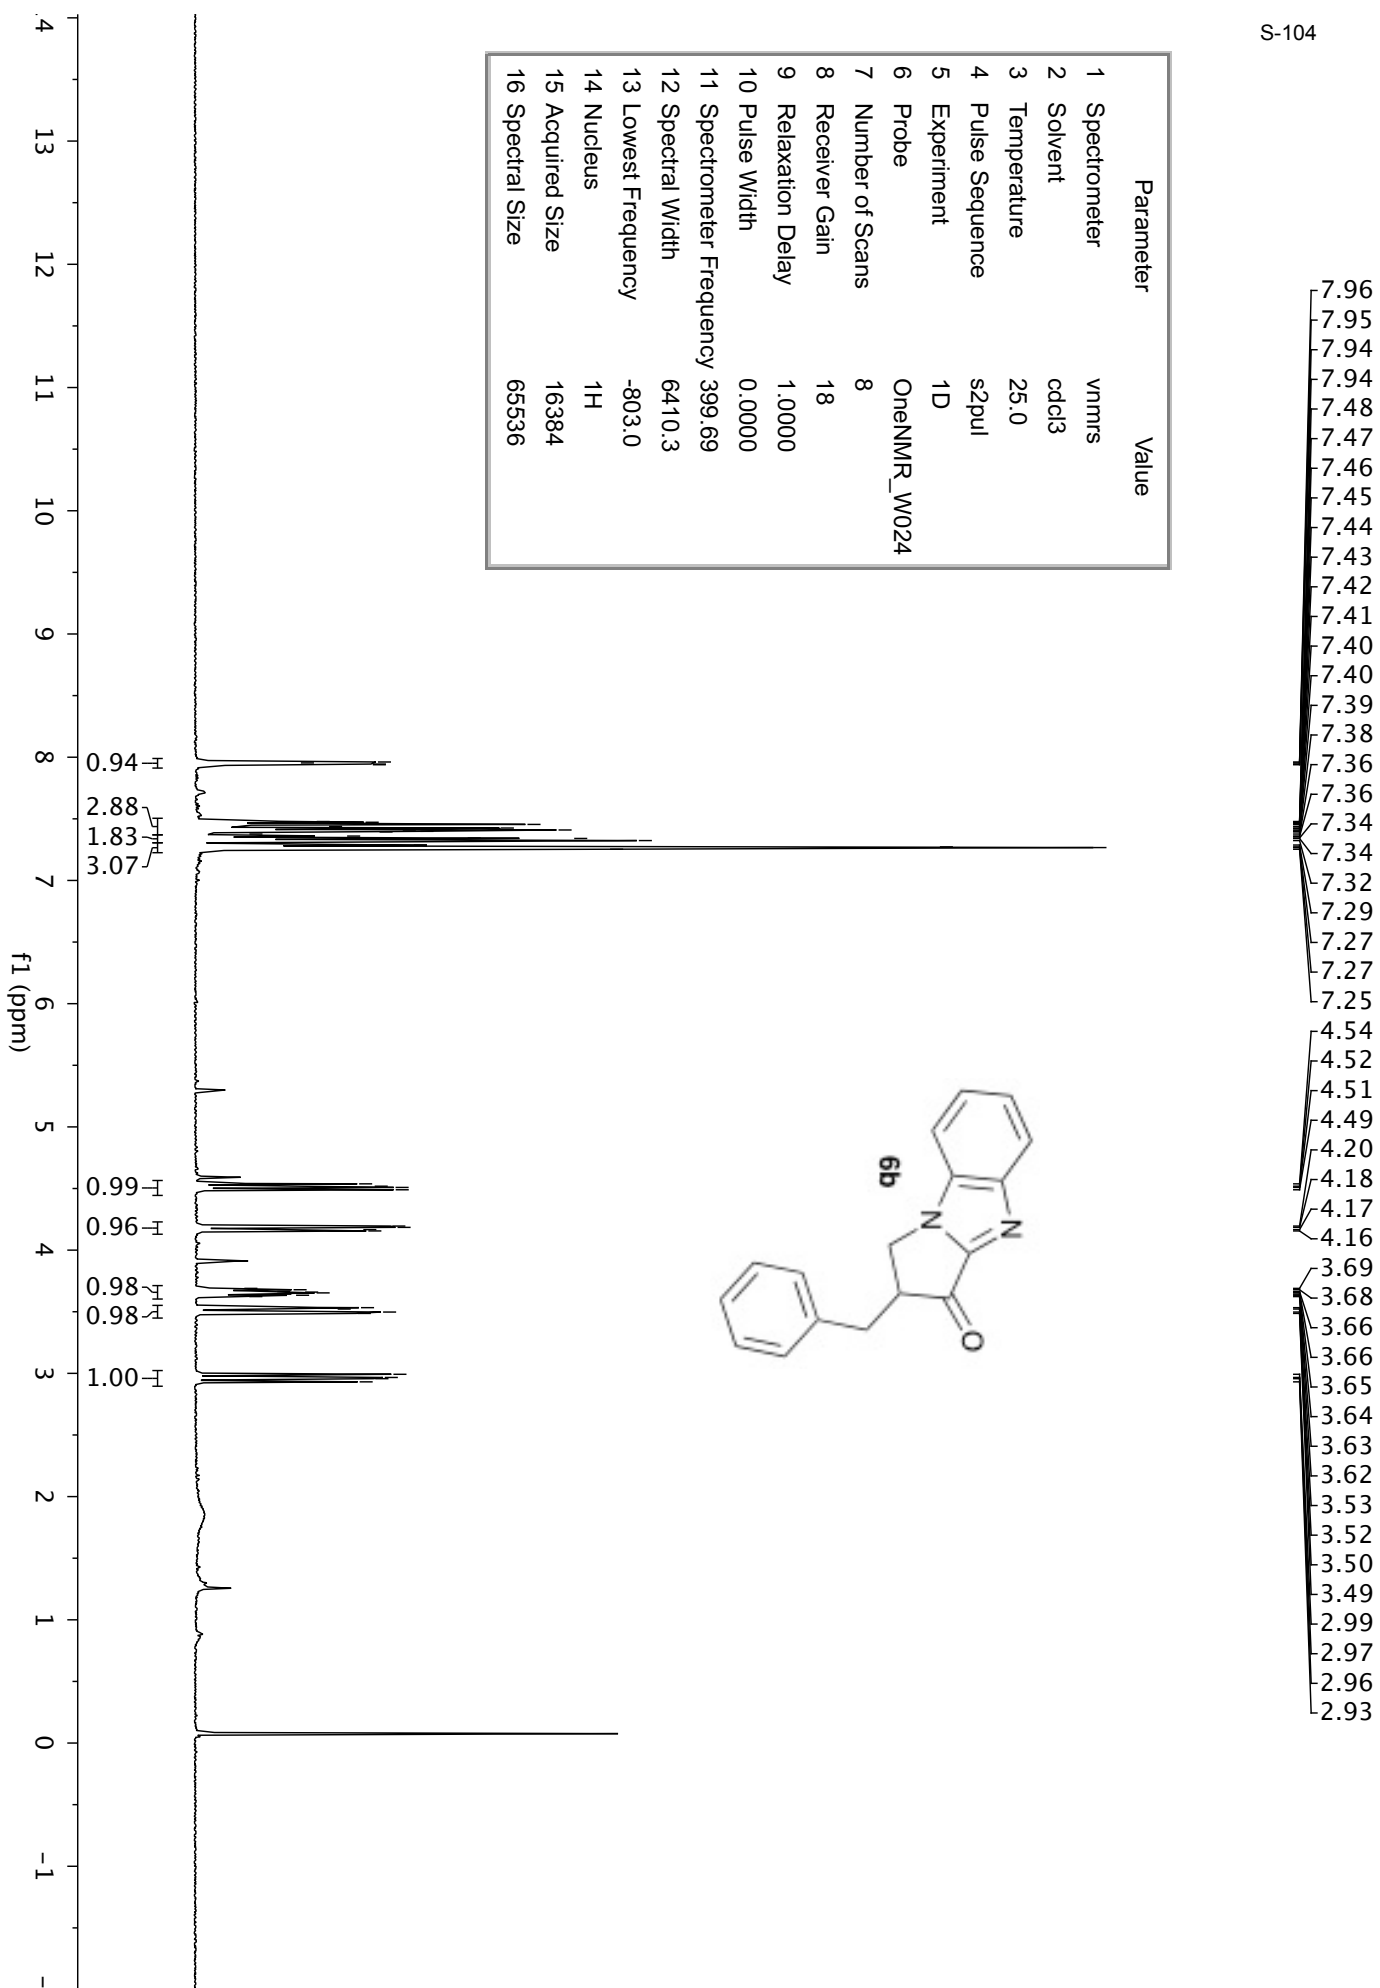



— 192.23

149.48  
 149.23  
 137.59  
 132.85  
 129.12  
 128.88  
 127.27  
 125.78  
 124.98  
 123.36

— 111.07

— 51.63

— 44.60

— 36.13

| Parameter                 | Value           |
|---------------------------|-----------------|
| 1 Spectrometer            | vmrns           |
| 2 Solvent                 | cdcl3           |
| 3 Temperature             | 25.0            |
| 4 Pulse Sequence          | s2pul           |
| 5 Experiment              | 1D              |
| 6 Probe                   | OneNMW024       |
| 7 Number of Scans         | 256             |
| 8 Receiver Gain           | 30              |
| 9 Relaxation Delay        | 1.0000          |
| 10 Pulse Width            | 0.0000          |
| 11 Spectrometer Frequency | 100.51          |
| 12 Spectral Width         | 25510.2         |
| 13 Lowest Frequency       | -1686.6         |
| 14 Nucleus                | <sup>13</sup> C |
| 15 Acquired Size          | 32768           |
| 16 Spectral Size          | 65536           |

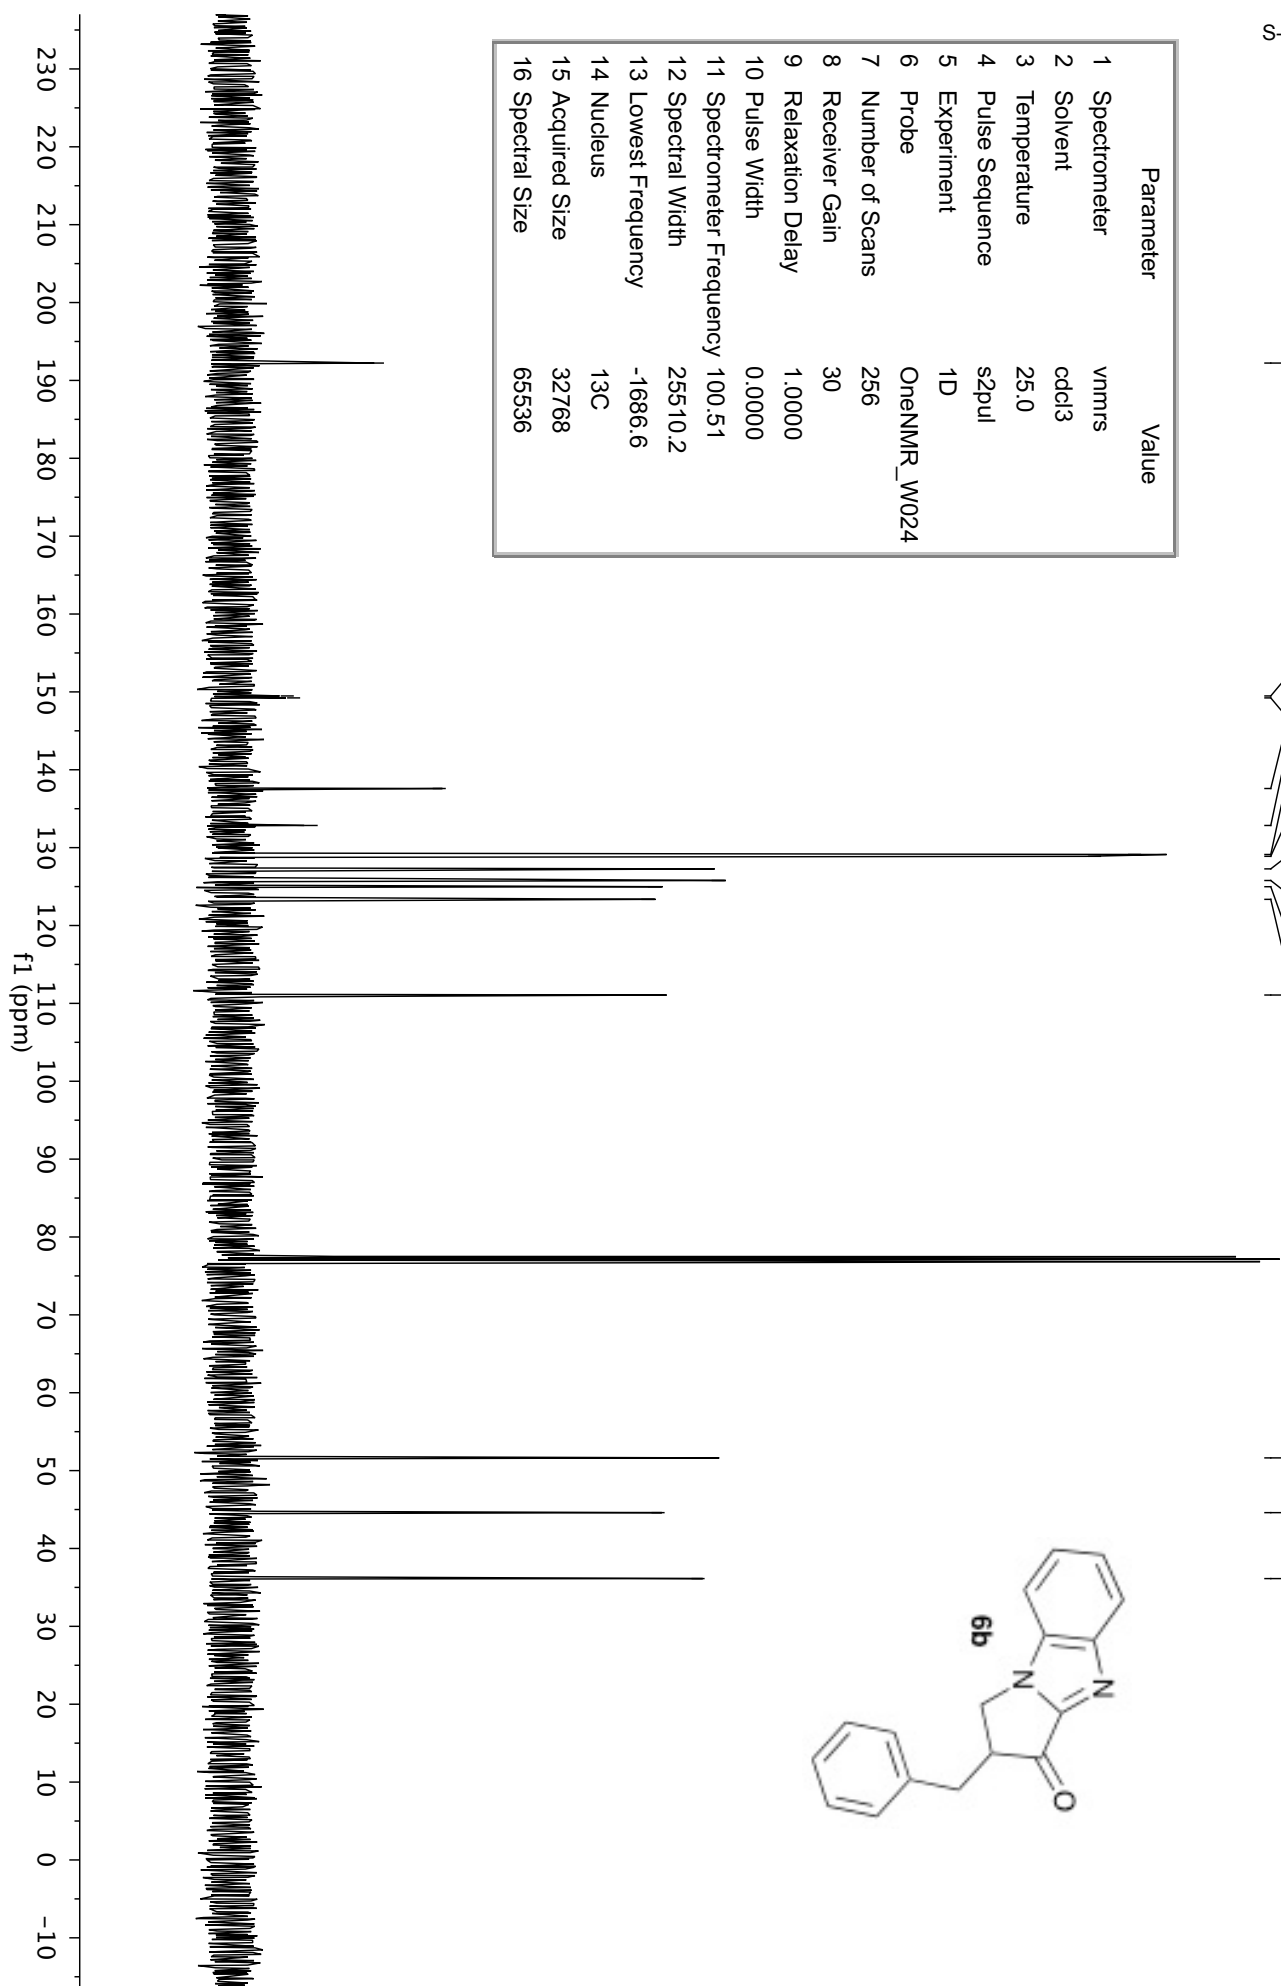

| Parameter                    | Value                                              |
|------------------------------|----------------------------------------------------|
| 1 Spectrometer               | spect                                              |
| 2 Solvent                    | DMSO                                               |
| 3 Temperature                | 298.2                                              |
| 4 Pulse Sequence             | zg30                                               |
| 5 Experiment                 | 1D                                                 |
| 6 Probe                      | 5 mm PABBO<br>BB/19F-1H/D<br>Z-GRD<br>Z114607/0065 |
| 7 Number of Scans            | 16                                                 |
| 8 Receiver Gain              | 88                                                 |
| 9 Relaxation Delay           | 1.0000                                             |
| 10 Pulse Width               | 11.0000                                            |
| 11 Spectrometer<br>Frequency | 600.39                                             |
| 12 Spectral Width            | 9615.4                                             |
| 13 Lowest Frequency          | -1216.2                                            |
| 14 Nucleus                   | <sup>1</sup> H                                     |
| 15 Acquired Size             | 32768                                              |
| 16 Spectral Size             | 65536                                              |

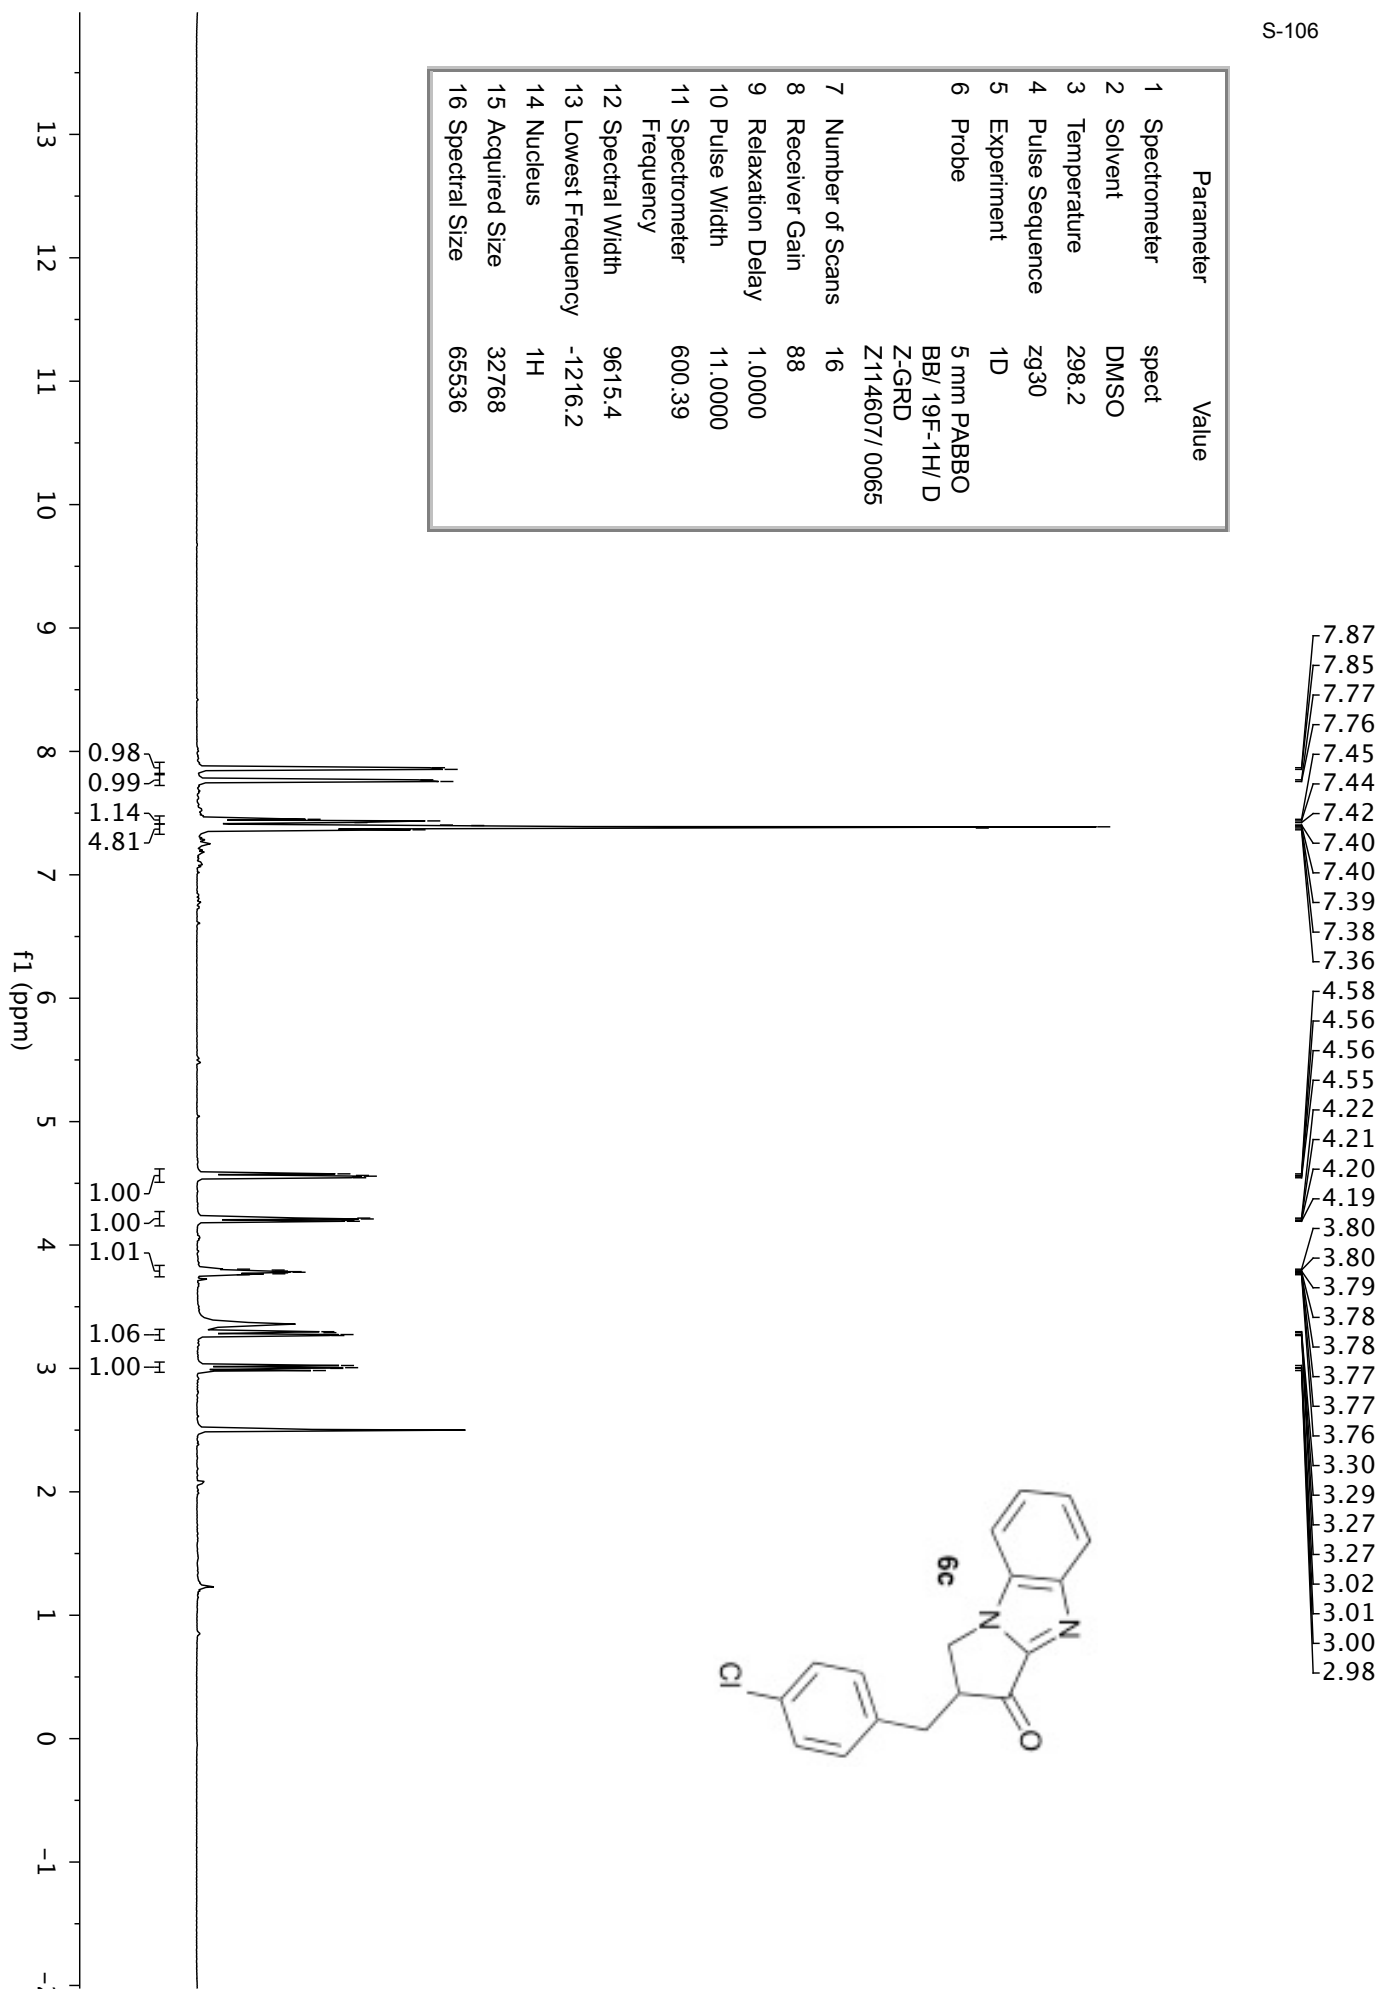

— 193.54

149.61  
 148.48  
 137.61  
 132.65  
 131.26  
 130.77  
 128.51  
 124.91  
 124.30  
 122.04  
 — 112.29

| Parameter                 | Value           |
|---------------------------|-----------------|
| 1 Spectrometer            | vmrs            |
| 2 Solvent                 | dmso            |
| 3 Temperature             | 25.0            |
| 4 Pulse Sequence          | s2pul           |
| 5 Experiment              | 1D              |
| 6 Probe                   | OneNMR_W024     |
| 7 Number of Scans         | 256             |
| 8 Receiver Gain           | 30              |
| 9 Relaxation Delay        | 1.0000          |
| 10 Pulse Width            | 0.0000          |
| 11 Spectrometer Frequency | 100.51          |
| 12 Spectral Width         | 25510.2         |
| 13 Lowest Frequency       | -1741.7         |
| 14 Nucleus                | <sup>13</sup> C |
| 15 Acquired Size          | 32768           |
| 16 Spectral Size          | 65536           |

— 50.81

— 44.62

— 34.06

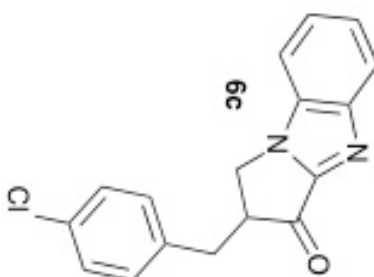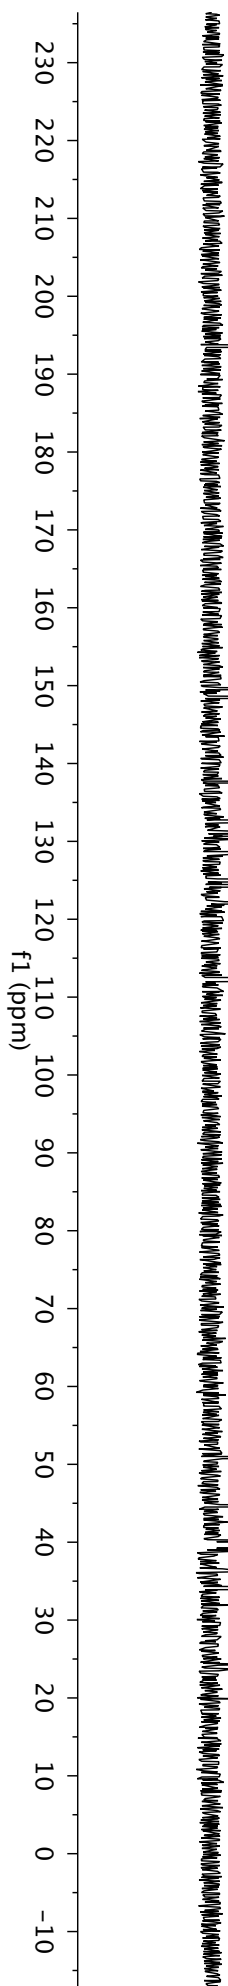

| Parameter                    | Value                                                  |
|------------------------------|--------------------------------------------------------|
| 1 Spectrometer               | spect                                                  |
| 2 Solvent                    | CDCl <sub>3</sub>                                      |
| 3 Temperature                | 298.0                                                  |
| 4 Pulse Sequence             | zg30                                                   |
| 5 Experiment                 | 1D                                                     |
| 6 Probe                      | 5 mm PABBO<br>BB/19F-1H/D<br>Z-GRD<br>Z114607/<br>0065 |
| 7 Number of Scans            | 16                                                     |
| 8 Receiver Gain              | 68                                                     |
| 9 Relaxation Delay           | 1.0000                                                 |
| 10 Pulse Width               | 11.0000                                                |
| 11 Spectrometer<br>Frequency | 600.39                                                 |
| 12 Spectral Width            | 9615.4                                                 |
| 13 Lowest Frequency          | -1214.4                                                |
| 14 Nucleus                   | <sup>1</sup> H                                         |
| 15 Acquired Size             | 32768                                                  |
| 16 Spectral Size             | 65536                                                  |

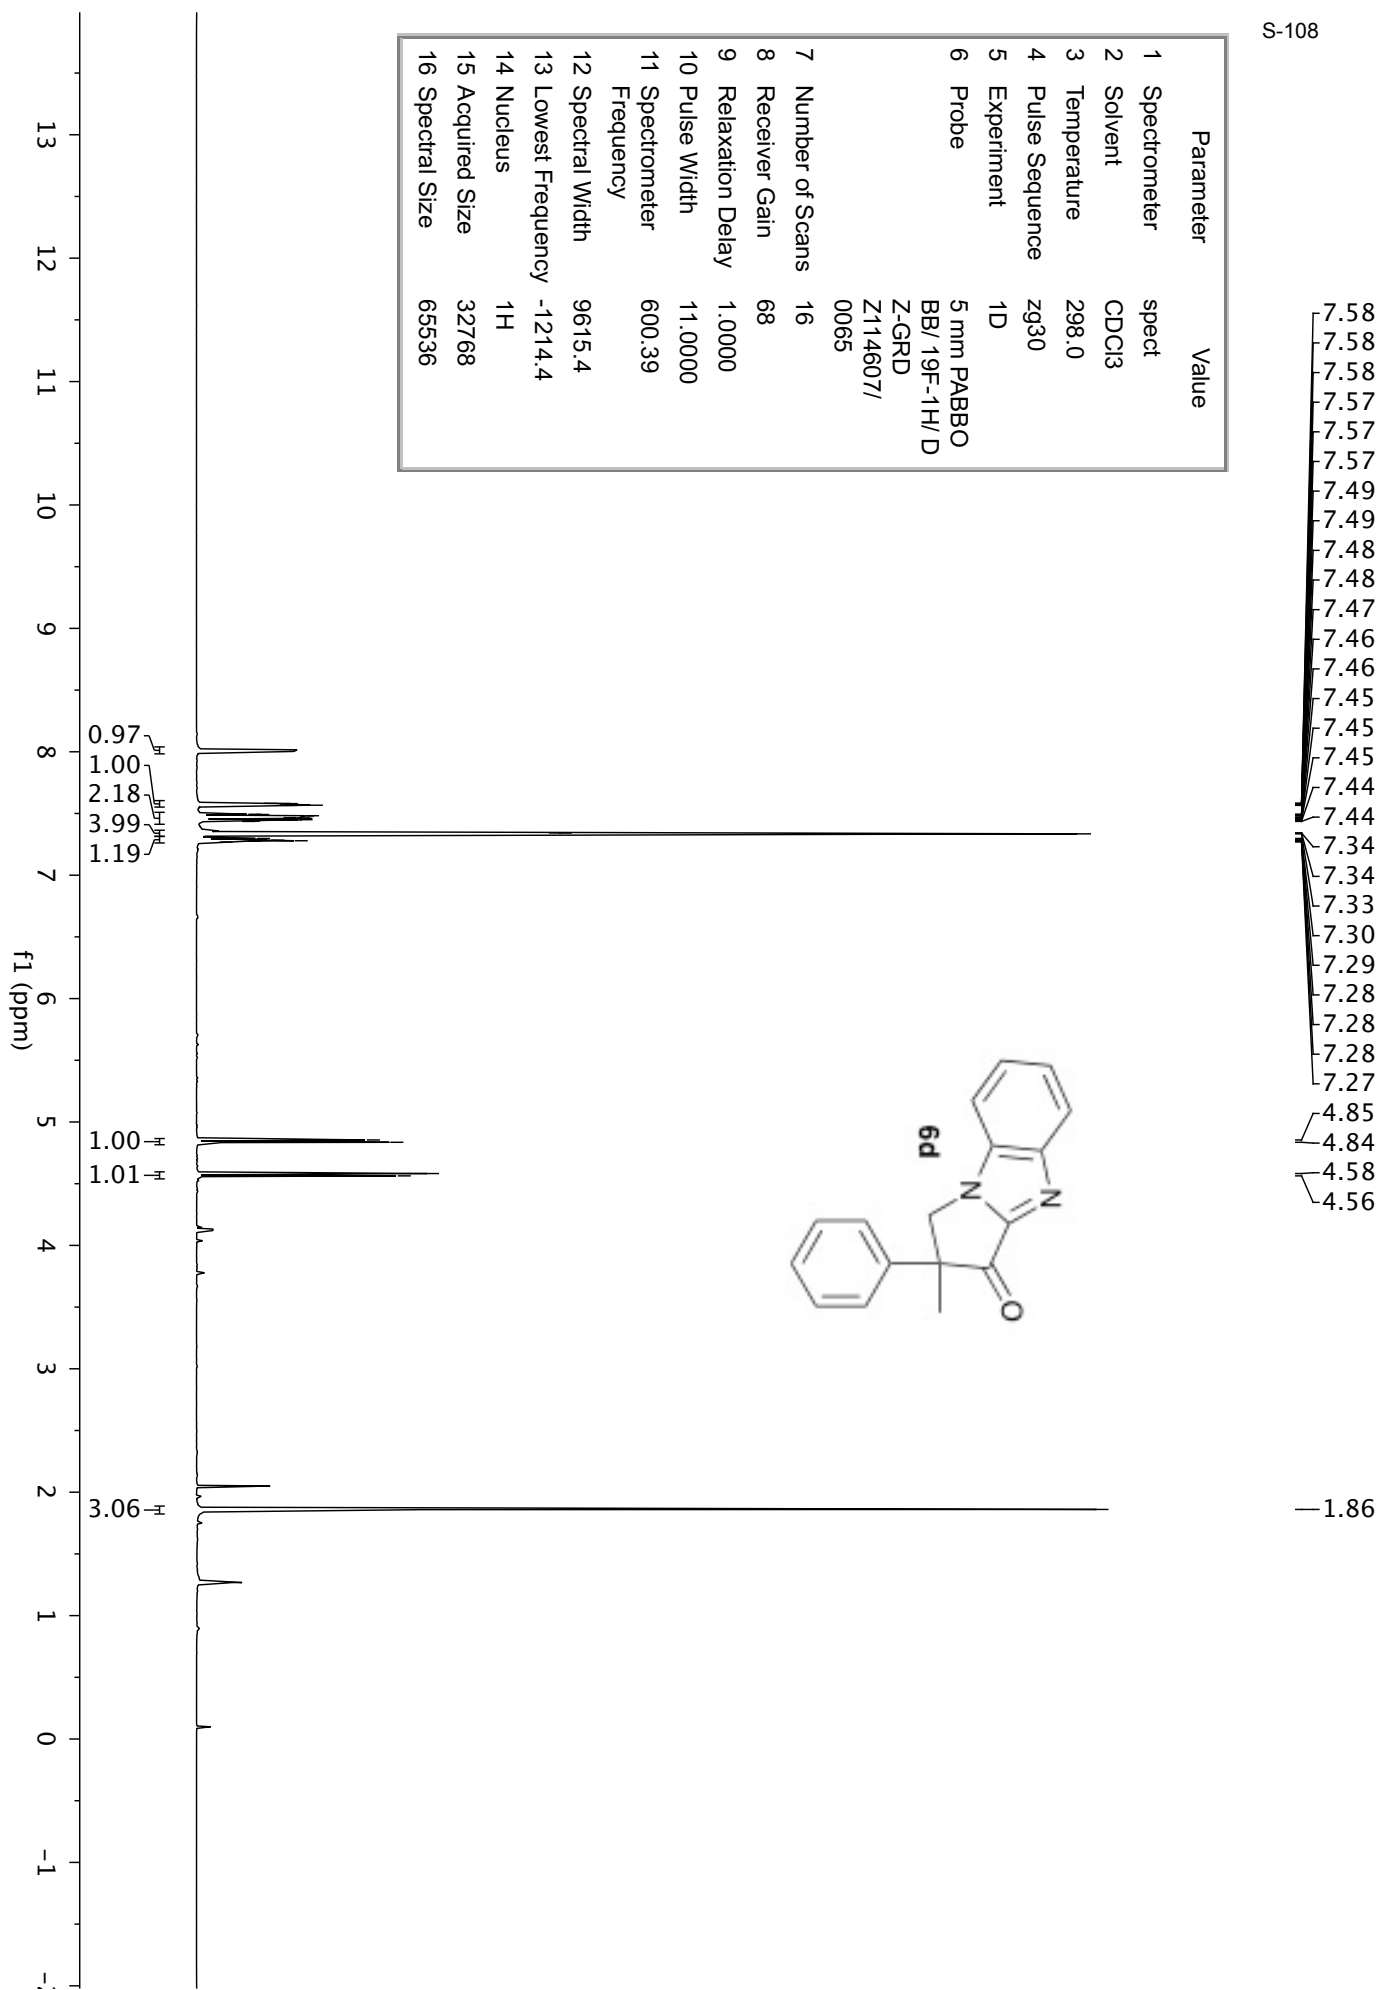

S-109  
— 193.80

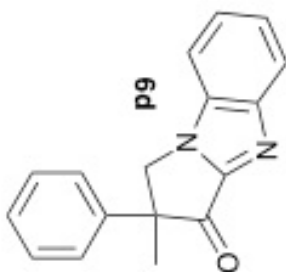

149.77  
148.62  
— 140.92  
132.84  
129.18  
127.86  
125.93  
125.90  
125.02  
123.38  
111.19

56.71  
55.50

— 23.78

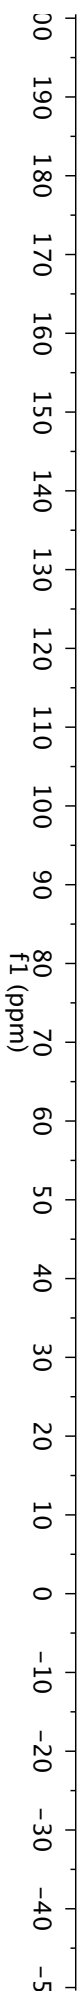

| Parameter                    | Value                                              |
|------------------------------|----------------------------------------------------|
| 1 Spectrometer               | spect                                              |
| 2 Solvent                    | CDCl3                                              |
| 3 Temperature                | 298.0                                              |
| 4 Pulse Sequence             | zgpg30                                             |
| 5 Experiment                 | 1D                                                 |
| 6 Probe                      | 5 mm PABBO<br>BB/19F-1H/D<br>Z-GRD<br>Z114607/0065 |
| 7 Number of Scans            | 278                                                |
| 8 Receiver Gain              | 177                                                |
| 9 Relaxation Delay           | 3.0000                                             |
| 10 Pulse Width               | 11.6000                                            |
| 11 Spectrometer<br>Frequency | 150.98                                             |
| 12 Spectral Width            | 37878.8                                            |
| 13 Lowest Frequency          | -7607.9                                            |
| 14 Nucleus                   | 13C                                                |
| 15 Acquired Size             | 32768                                              |
| 16 Spectral Size             | 65536                                              |

| Parameter                    | Value                                             |
|------------------------------|---------------------------------------------------|
| 1 Spectrometer               | spect                                             |
| 2 Solvent                    | CDCl3                                             |
| 3 Temperature                | 298.0                                             |
| 4 Pulse Sequence             | zg30                                              |
| 5 Experiment                 | 1D                                                |
| 6 Probe                      | 5 mm PABBO BB/<br>19F-1H/ D Z-GRD<br>Z114607/0065 |
| 7 Number of Scans            | 16                                                |
| 8 Receiver Gain              | 128                                               |
| 9 Relaxation Delay           | 1.0000                                            |
| 10 Pulse Width               | 11.0000                                           |
| 11 Spectrometer<br>Frequency | 600.39                                            |
| 12 Spectral Width            | 9615.4                                            |
| 13 Lowest Frequency          | -1225.8                                           |
| 14 Nucleus                   | <sup>1</sup> H                                    |
| 15 Acquired Size             | 32768                                             |
| 16 Spectral Size             | 65536                                             |

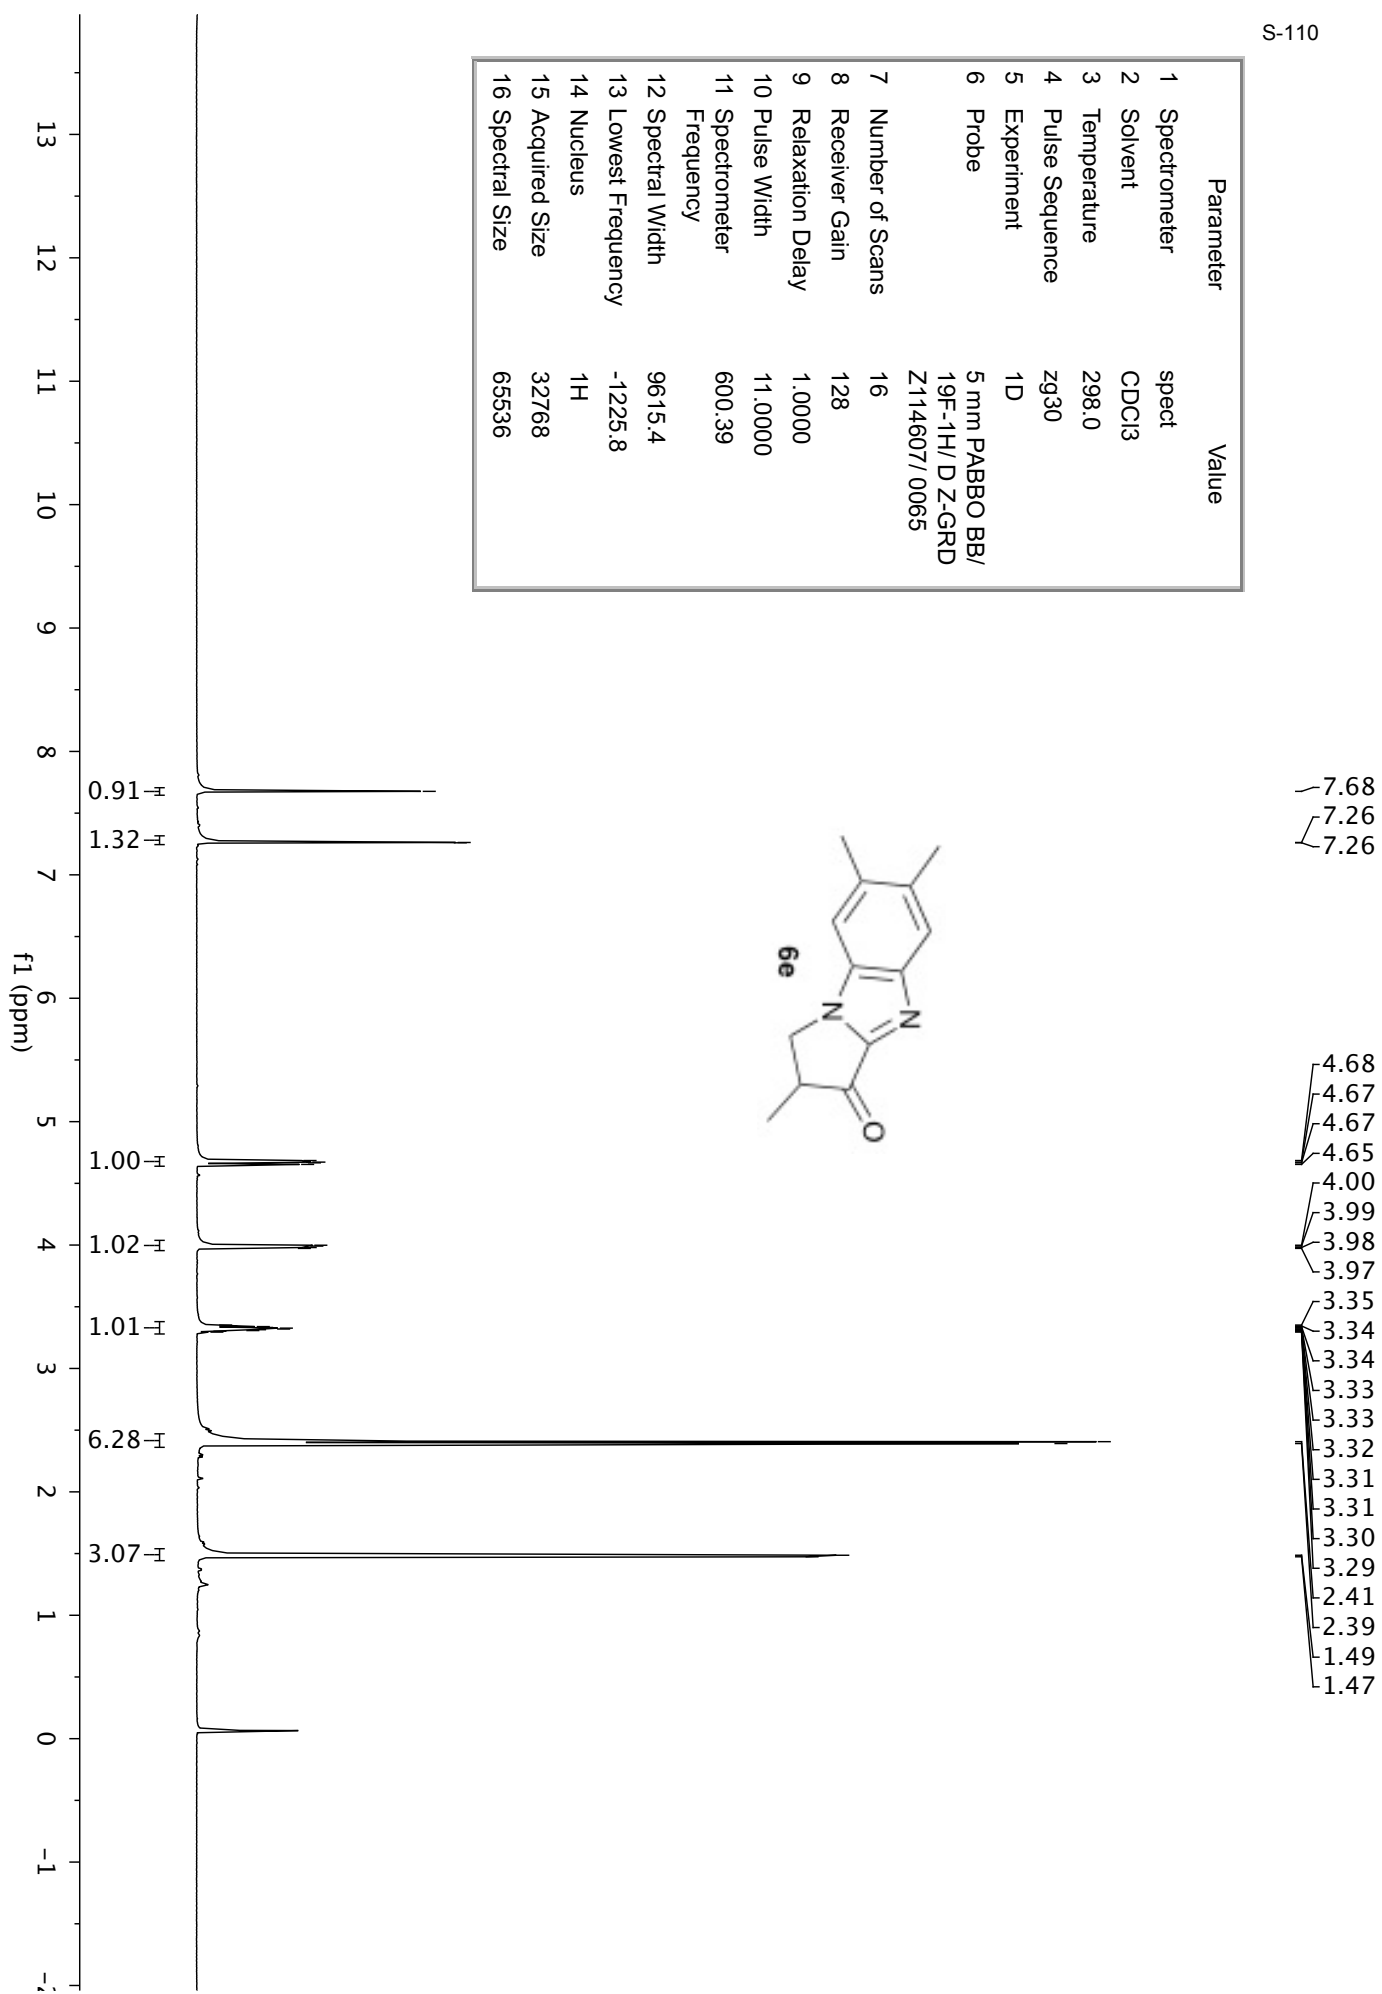

S-111  
 — 193.36  
 — 148.47  
 — 135.88  
 — 134.60  
 — 131.56  
 — 122.65  
 — 110.70

| Parameter                 | Value                                             |
|---------------------------|---------------------------------------------------|
| 1 Spectrometer            | spect                                             |
| 2 Solvent                 | CDCl3                                             |
| 3 Temperature             | 298.0                                             |
| 4 Pulse Sequence          | zgpg30                                            |
| 5 Experiment              | 1D                                                |
| 6 Probe                   | 5 mm PABBO BB/<br>19F-1H/ D Z-GRD<br>Z114607/0065 |
| 7 Number of Scans         | 1053                                              |
| 8 Receiver Gain           | 177                                               |
| 9 Relaxation Delay        | 3.0000                                            |
| 10 Pulse Width            | 11.6000                                           |
| 11 Spectrometer Frequency | 150.98                                            |
| 12 Spectral Width         | 37878.8                                           |
| 13 Lowest Frequency       | -7599.6                                           |
| 14 Nucleus                | <sup>13</sup> C                                   |
| 15 Acquired Size          | 32768                                             |
| 16 Spectral Size          | 65536                                             |

— 46.96  
 — 45.05  
 — 20.95  
 — 20.75  
 — 15.50  
 — 1.15

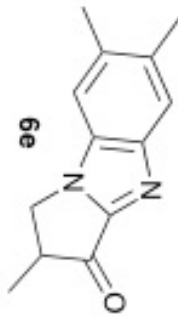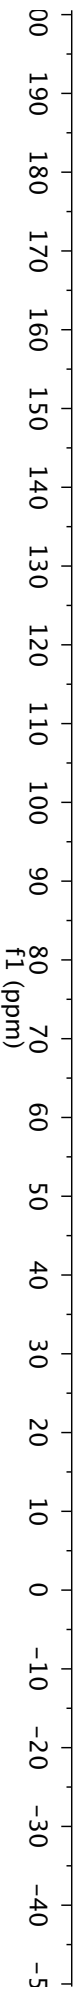

| Parameter                    | Value                                           |
|------------------------------|-------------------------------------------------|
| 1 Spectrometer               | spect                                           |
| 2 Solvent                    | CDCl3                                           |
| 3 Temperature                | 298.0                                           |
| 4 Pulse Sequence             | zg30                                            |
| 5 Experiment                 | 1D                                              |
| 6 Probe                      | 5 mm PABBO BB/<br>19F-1H/DZ-GRD<br>Z114607/0065 |
| 7 Number of Scans            | 16                                              |
| 8 Receiver Gain              | 128                                             |
| 9 Relaxation Delay           | 1.0000                                          |
| 10 Pulse Width               | 11.0000                                         |
| 11 Spectrometer<br>Frequency | 600.39                                          |
| 12 Spectral Width            | 9615.4                                          |
| 13 Lowest Frequency          | -1205.4                                         |
| 14 Nucleus                   | <sup>1</sup> H                                  |
| 15 Acquired Size             | 32768                                           |
| 16 Spectral Size             | 65536                                           |

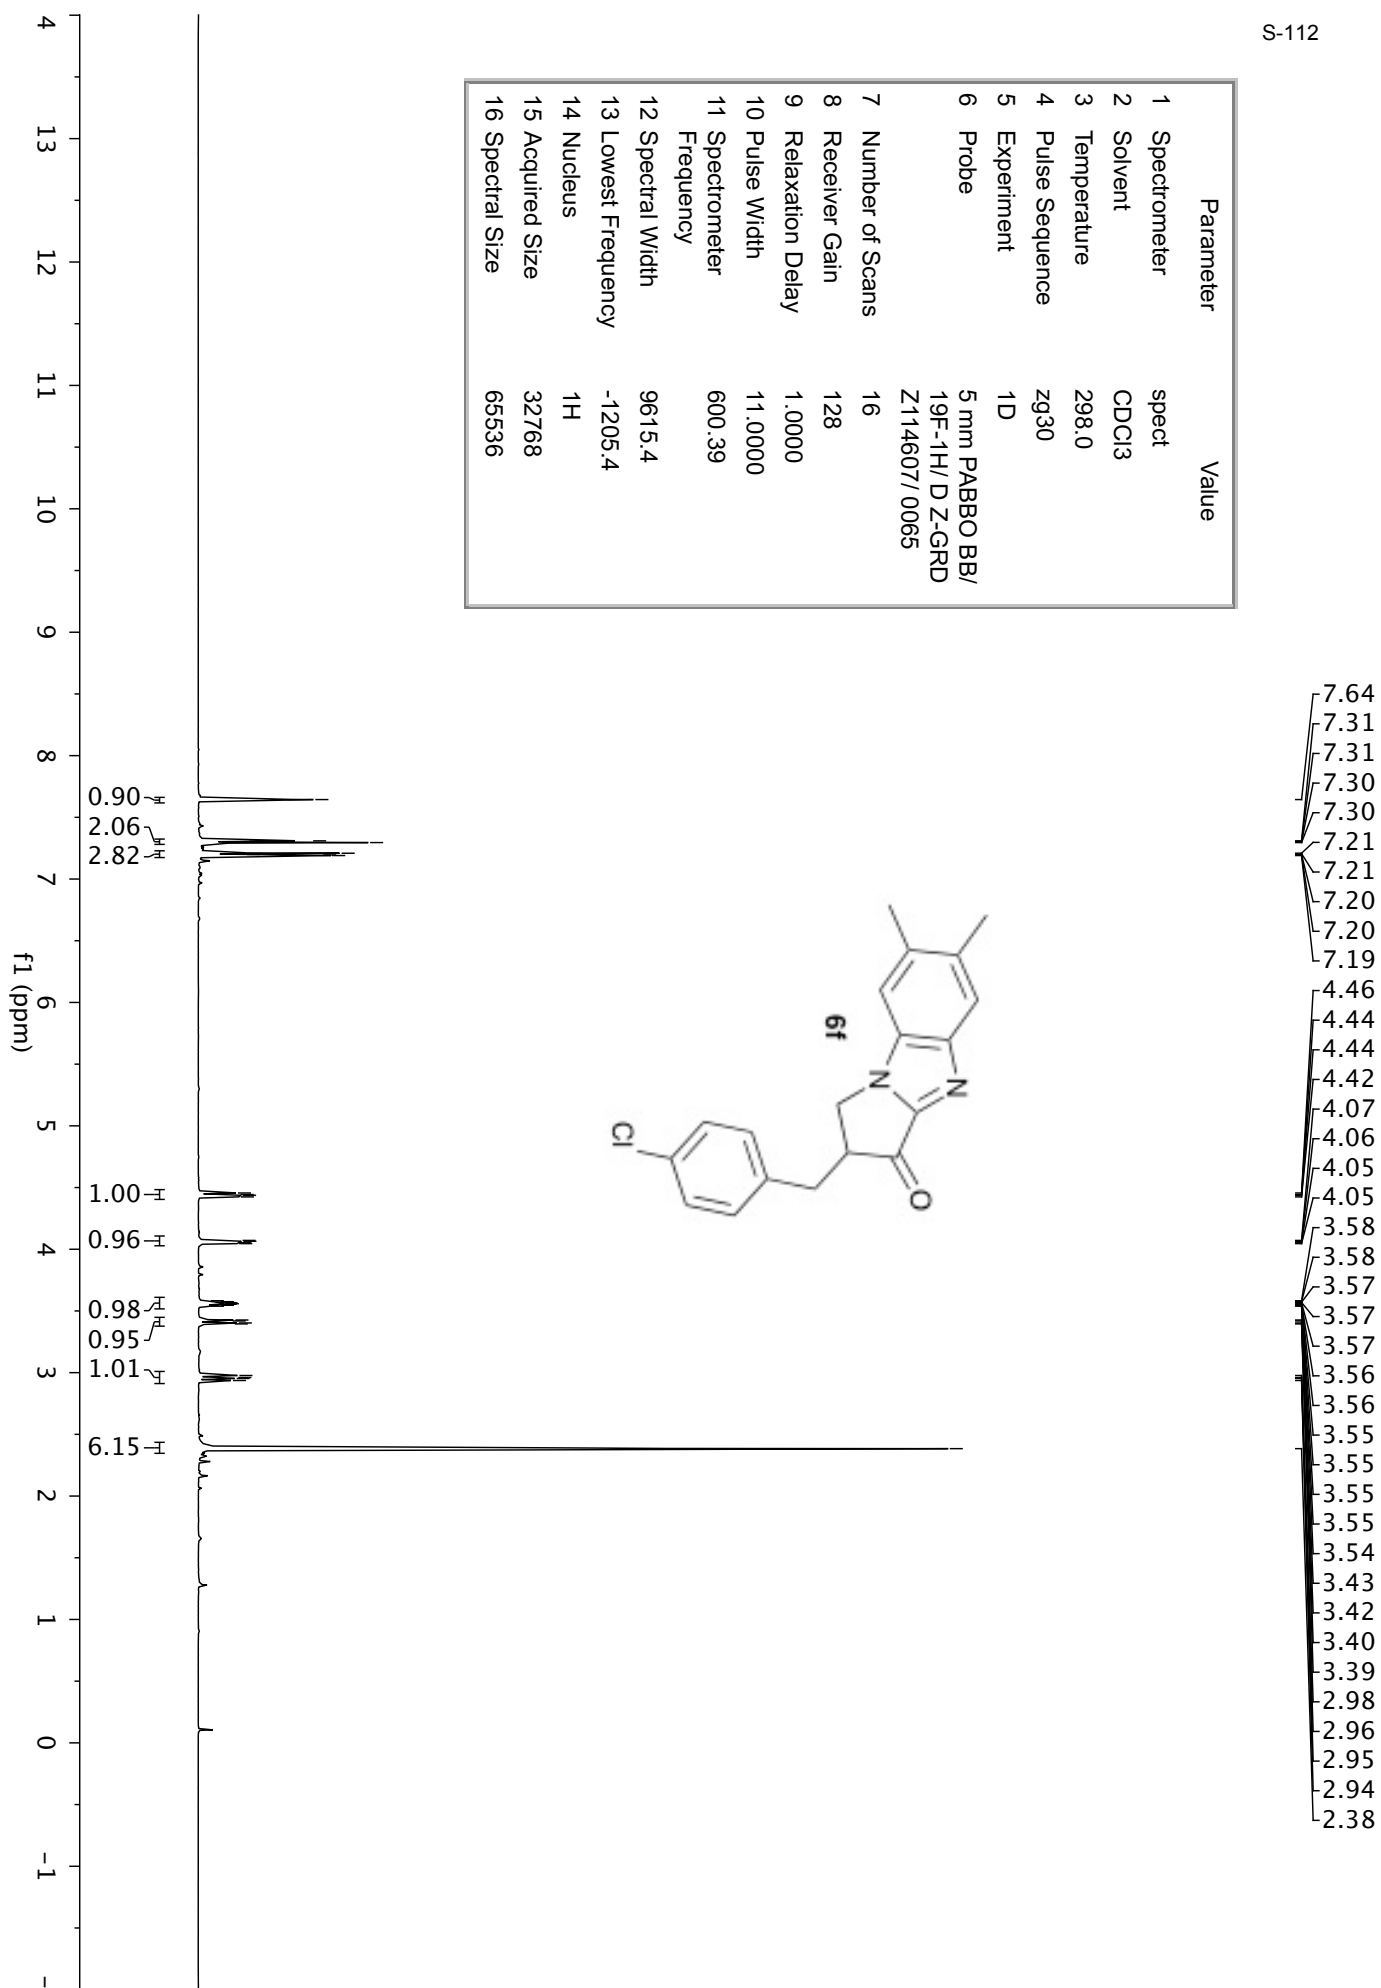



— 191.55

 148.31  
 148.29

 136.21  
 136.06

134.77

133.02

131.51

130.26

129.15

122.50

— 110.70

— 51.32

— 44.31

— 35.38

20.90

20.69

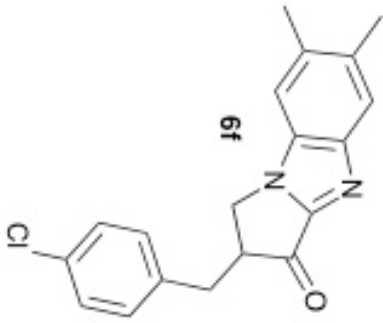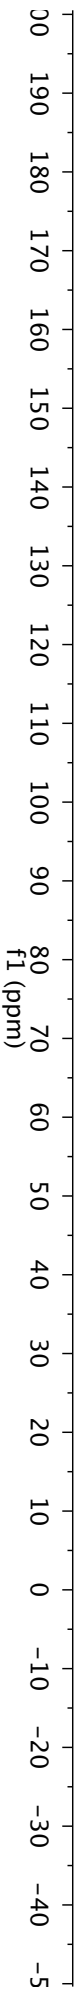

| Parameter                 | Value                                              |
|---------------------------|----------------------------------------------------|
| 1 Spectrometer            | spect                                              |
| 2 Solvent                 | CDCI3                                              |
| 3 Temperature             | 298.0                                              |
| 4 Pulse Sequence          | zpgpg30                                            |
| 5 Experiment              | 1D                                                 |
| 6 Probe                   | 5 mm PABBO<br>BB/19F-1H/D<br>Z-GRD<br>Z114607/0065 |
| 7 Number of Scans         | 147                                                |
| 8 Receiver Gain           | 177                                                |
| 9 Relaxation Delay        | 3.0000                                             |
| 10 Pulse Width            | 11.6000                                            |
| 11 Spectrometer Frequency | 150.98                                             |
| 12 Spectral Width         | 37878.8                                            |
| 13 Lowest Frequency       | -7604.6                                            |
| 14 Nucleus                | <sup>13</sup> C                                    |
| 15 Acquired Size          | 32768                                              |
| 16 Spectral Size          | 65536                                              |

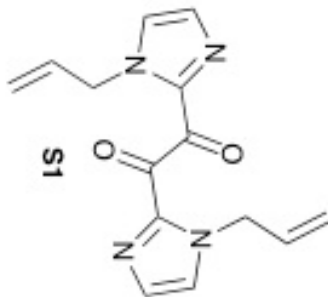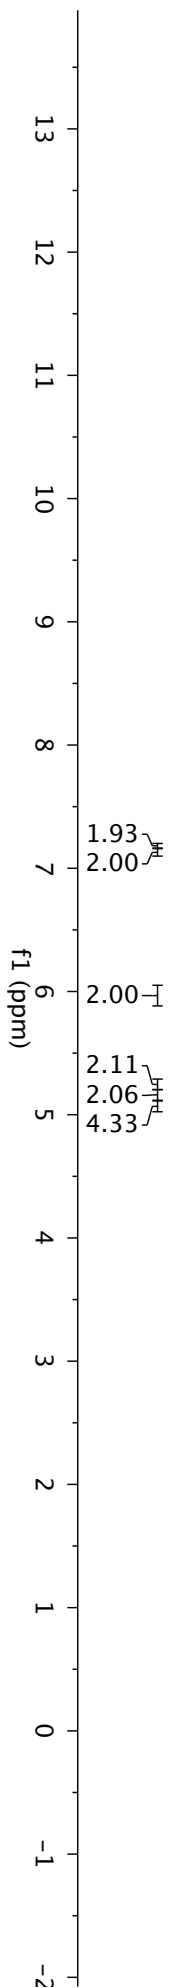

| Parameter                 | Value          |
|---------------------------|----------------|
| 1 Spectrometer            | vnmr5          |
| 2 Solvent                 | cdcl3          |
| 3 Temperature             | 25.0           |
| 4 Pulse Sequence          | sZpul          |
| 5 Experiment              | 1D             |
| 6 Probe                   | OneNMR_W024    |
| 7 Number of Scans         | 8              |
| 8 Receiver Gain           | 18             |
| 9 Relaxation Delay        | 1.0000         |
| 10 Pulse Width            | 0.0000         |
| 11 Spectrometer Frequency | 399.69         |
| 12 Spectral Width         | 6410.3         |
| 13 Lowest Frequency       | -829.5         |
| 14 Nucleus                | <sup>1</sup> H |
| 15 Acquired Size          | 16384          |
| 16 Spectral Size          | 65536          |

— 183.21

— 140.29

— 132.18

— 132.13

— 126.32

— 119.50

— 50.66

| Parameter                 | Value           |
|---------------------------|-----------------|
| 1 Spectrometer            | nmrs            |
| 2 Solvent                 | cdcl3           |
| 3 Temperature             | 25.0            |
| 4 Pulse Sequence          | s2pul           |
| 5 Experiment              | 1D              |
| 6 Probe                   | OneNMR_W024     |
| 7 Number of Scans         | 256             |
| 8 Receiver Gain           | 30              |
| 9 Relaxation Delay        | 1.0000          |
| 10 Pulse Width            | 0.0000          |
| 11 Spectrometer Frequency | 100.51          |
| 12 Spectral Width         | 25510.2         |
| 13 Lowest Frequency       | -1686.6         |
| 14 Nucleus                | <sup>13</sup> C |
| 15 Acquired Size          | 32768           |
| 16 Spectral Size          | 65536           |

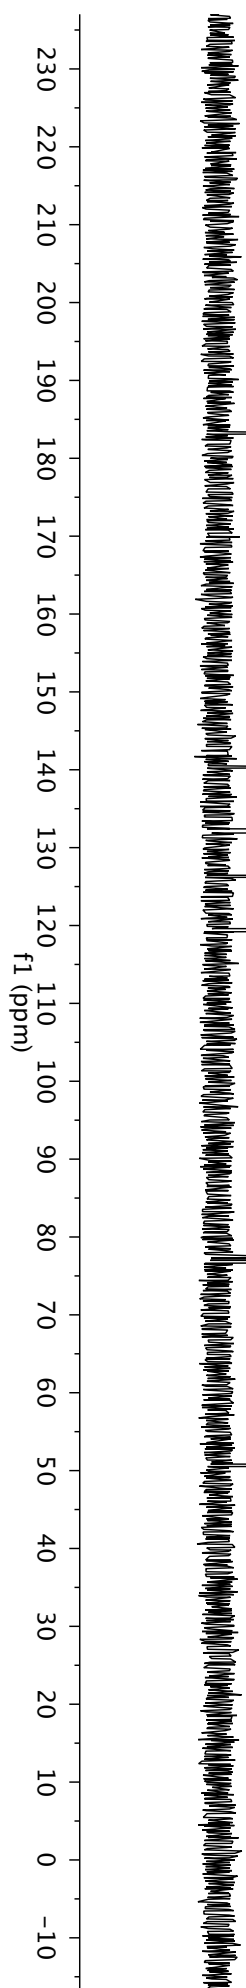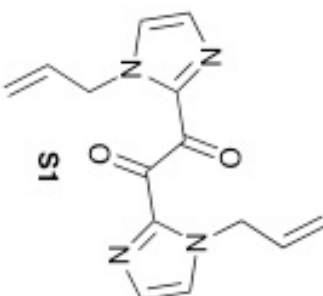

Supplement: c6ob01956k1.pdf [file c6ob01956k1.pdf]
